# Supplementary material for: Unravelling Chemical Pathways of H2 on Ga2O3 surfaces with Spectro-Electrochemistry
Source: Royal Society of Chemistry journal article supplement (doi:10.1039/d5lf00353a), 2026-01-01
Supplement: d5lf00353a1.zip [file SingleChannel_DRIFTS.xlsx]

## Sheet: SingleChannel_500C
Wavenumber	Nitrogen 1	25H2	50H2	75H2	100H2	125H2	150H2 1	175H2	200H2	250H2	300H2	350H2	400H2	450H2	500H2	750H2	1000H2	1250H2	1500H2	1750H2	2000H2	2250H2	2500H2	2750H2	3000H2	4000H2	5000H2	7500H2	10000H2
399.19	0	1e-05	6e-05	2e-05	0	2e-05	3e-05	2e-05	0	0	2e-05	1e-05	2e-05	3e-05	2e-05	2e-05	1e-05	-1e-05	1e-05	0	1e-05	2e-05	4e-05	0	1e-05	1e-05	1e-05	-1e-05	1e-05
401.118	0	1e-05	5e-05	1e-05	0	1e-05	2e-05	1e-05	0	1e-05	2e-05	1e-05	2e-05	2e-05	1e-05	1e-05	1e-05	-1e-05	1e-05	1e-05	3e-05	3e-05	3e-05	1e-05	1e-05	2e-05	2e-05	0	2e-05
403.047	0	1e-05	4e-05	1e-05	0	1e-05	2e-05	1e-05	1e-05	3e-05	2e-05	1e-05	2e-05	1e-05	1e-05	0	1e-05	1e-05	1e-05	2e-05	3e-05	4e-05	2e-05	1e-05	1e-05	1e-05	2e-05	2e-05	1e-05
404.975	0	1e-05	3e-05	1e-05	1e-05	2e-05	2e-05	2e-05	1e-05	3e-05	2e-05	1e-05	1e-05	1e-05	1e-05	0	1e-05	2e-05	1e-05	2e-05	3e-05	4e-05	1e-05	1e-05	1e-05	0	1e-05	2e-05	1e-05
406.904	1e-05	1e-05	2e-05	2e-05	2e-05	3e-05	2e-05	2e-05	1e-05	2e-05	2e-05	1e-05	1e-05	1e-05	2e-05	0	1e-05	3e-05	1e-05	2e-05	3e-05	3e-05	1e-05	1e-05	1e-05	1e-05	1e-05	2e-05	1e-05
408.832	2e-05	1e-05	2e-05	2e-05	3e-05	2e-05	2e-05	2e-05	1e-05	1e-05	1e-05	1e-05	1e-05	1e-05	2e-05	0	1e-05	2e-05	1e-05	2e-05	3e-05	2e-05	0	0	1e-05	2e-05	1e-05	2e-05	2e-05
410.761	2e-05	1e-05	1e-05	1e-05	3e-05	2e-05	1e-05	1e-05	0	1e-05	1e-05	1e-05	1e-05	1e-05	1e-05	1e-05	1e-05	2e-05	1e-05	1e-05	2e-05	1e-05	0	0	2e-05	2e-05	1e-05	2e-05	2e-05
412.689	2e-05	1e-05	1e-05	1e-05	3e-05	1e-05	1e-05	0	1e-05	1e-05	2e-05	1e-05	1e-05	1e-05	0	1e-05	1e-05	1e-05	1e-05	0	1e-05	2e-05	1e-05	1e-05	2e-05	2e-05	1e-05	2e-05	2e-05
414.617	2e-05	1e-05	1e-05	0	4e-05	1e-05	1e-05	0	1e-05	1e-05	1e-05	2e-05	1e-05	1e-05	0	1e-05	1e-05	1e-05	1e-05	0	1e-05	2e-05	2e-05	1e-05	1e-05	1e-05	1e-05	2e-05	2e-05
416.546	1e-05	1e-05	1e-05	1e-05	4e-05	2e-05	1e-05	0	1e-05	1e-05	1e-05	2e-05	2e-05	1e-05	1e-05	2e-05	1e-05	1e-05	3e-05	0	1e-05	2e-05	2e-05	1e-05	1e-05	1e-05	1e-05	2e-05	1e-05
418.474	1e-05	1e-05	1e-05	2e-05	4e-05	1e-05	1e-05	1e-05	1e-05	2e-05	1e-05	2e-05	2e-05	2e-05	1e-05	2e-05	0	1e-05	3e-05	1e-05	0	2e-05	1e-05	1e-05	1e-05	0	0	1e-05	0
420.403	1e-05	1e-05	2e-05	2e-05	3e-05	1e-05	1e-05	1e-05	2e-05	2e-05	1e-05	2e-05	2e-05	2e-05	1e-05	3e-05	0	1e-05	2e-05	1e-05	0	2e-05	1e-05	0	0	1e-05	0	1e-05	1e-05
422.331	1e-05	1e-05	1e-05	1e-05	2e-05	0	0	1e-05	2e-05	2e-05	0	1e-05	2e-05	2e-05	0	3e-05	-1e-05	1e-05	1e-05	1e-05	1e-05	1e-05	2e-05	1e-05	-1e-05	2e-05	1e-05	1e-05	1e-05
424.26	1e-05	1e-05	2e-05	0	1e-05	0	0	1e-05	1e-05	2e-05	0	0	1e-05	2e-05	0	2e-05	0	0	1e-05	1e-05	1e-05	0	2e-05	1e-05	0	2e-05	1e-05	1e-05	0
426.188	1e-05	0	2e-05	0	2e-05	1e-05	1e-05	1e-05	1e-05	1e-05	1e-05	0	1e-05	1e-05	-1e-05	0	0	0	1e-05	1e-05	1e-05	0	1e-05	1e-05	0	2e-05	2e-05	0	0
428.117	2e-05	1e-05	1e-05	1e-05	2e-05	2e-05	2e-05	1e-05	2e-05	1e-05	2e-05	1e-05	2e-05	1e-05	0	0	1e-05	1e-05	1e-05	1e-05	1e-05	1e-05	1e-05	1e-05	1e-05	3e-05	1e-05	1e-05	0
430.045	2e-05	1e-05	0	1e-05	2e-05	2e-05	1e-05	1e-05	2e-05	1e-05	2e-05	2e-05	2e-05	1e-05	1e-05	0	0	1e-05	1e-05	1e-05	2e-05	2e-05	1e-05	1e-05	1e-05	2e-05	1e-05	1e-05	0
431.974	1e-05	1e-05	0	1e-05	3e-05	2e-05	0	1e-05	2e-05	1e-05	2e-05	2e-05	2e-05	1e-05	2e-05	0	0	1e-05	0	1e-05	2e-05	2e-05	2e-05	0	2e-05	2e-05	1e-05	1e-05	0
433.902	1e-05	1e-05	1e-05	1e-05	3e-05	2e-05	0	1e-05	1e-05	2e-05	1e-05	2e-05	1e-05	2e-05	1e-05	0	1e-05	1e-05	0	1e-05	2e-05	1e-05	2e-05	0	2e-05	2e-05	1e-05	2e-05	0
435.83	1e-05	1e-05	1e-05	0	3e-05	3e-05	1e-05	1e-05	1e-05	1e-05	1e-05	2e-05	1e-05	2e-05	0	0	2e-05	1e-05	0	1e-05	2e-05	1e-05	2e-05	1e-05	2e-05	2e-05	1e-05	2e-05	1e-05
437.759	2e-05	2e-05	1e-05	0	2e-05	3e-05	2e-05	2e-05	1e-05	1e-05	0	2e-05	1e-05	1e-05	0	0	3e-05	1e-05	1e-05	2e-05	3e-05	1e-05	1e-05	2e-05	2e-05	2e-05	0	3e-05	0
439.687	2e-05	2e-05	2e-05	0	1e-05	2e-05	2e-05	2e-05	1e-05	1e-05	0	2e-05	2e-05	1e-05	1e-05	1e-05	3e-05	1e-05	2e-05	2e-05	3e-05	0	1e-05	2e-05	2e-05	2e-05	0	2e-05	0
441.616	1e-05	1e-05	1e-05	0	1e-05	1e-05	1e-05	1e-05	1e-05	2e-05	1e-05	2e-05	2e-05	2e-05	1e-05	0	2e-05	1e-05	2e-05	2e-05	2e-05	1e-05	0	2e-05	2e-05	2e-05	0	1e-05	0
443.544	1e-05	0	1e-05	0	1e-05	1e-05	1e-05	0	1e-05	2e-05	1e-05	2e-05	2e-05	2e-05	1e-05	0	1e-05	1e-05	1e-05	2e-05	1e-05	1e-05	0	3e-05	2e-05	1e-05	1e-05	1e-05	0
445.473	1e-05	1e-05	1e-05	1e-05	2e-05	1e-05	1e-05	0	2e-05	2e-05	1e-05	2e-05	2e-05	2e-05	1e-05	0	1e-05	1e-05	1e-05	2e-05	1e-05	1e-05	0	2e-05	2e-05	1e-05	1e-05	2e-05	1e-05
447.401	2e-05	2e-05	1e-05	1e-05	2e-05	2e-05	1e-05	1e-05	2e-05	1e-05	1e-05	2e-05	2e-05	1e-05	1e-05	1e-05	1e-05	1e-05	1e-05	2e-05	1e-05	1e-05	1e-05	2e-05	2e-05	1e-05	1e-05	2e-05	2e-05
449.33	1e-05	1e-05	1e-05	2e-05	2e-05	2e-05	2e-05	2e-05	2e-05	1e-05	1e-05	2e-05	2e-05	0	1e-05	2e-05	1e-05	2e-05	2e-05	2e-05	2e-05	2e-05	2e-05	2e-05	0	1e-05	1e-05	3e-05	2e-05
451.258	1e-05	1e-05	2e-05	2e-05	2e-05	2e-05	2e-05	2e-05	3e-05	1e-05	2e-05	1e-05	2e-05	0	2e-05	3e-05	1e-05	2e-05	2e-05	1e-05	2e-05	2e-05	1e-05	2e-05	-3e-05	2e-05	1e-05	4e-05	2e-05
453.187	1e-05	1e-05	3e-05	2e-05	2e-05	2e-05	2e-05	1e-05	2e-05	1e-05	1e-05	1e-05	2e-05	1e-05	2e-05	3e-05	0	2e-05	2e-05	0	2e-05	2e-05	1e-05	2e-05	-5e-05	3e-05	1e-05	4e-05	2e-05
455.115	1e-05	1e-05	2e-05	1e-05	2e-05	2e-05	2e-05	1e-05	2e-05	1e-05	1e-05	1e-05	2e-05	1e-05	2e-05	3e-05	0	2e-05	1e-05	0	1e-05	2e-05	1e-05	1e-05	-2e-05	2e-05	0	2e-05	1e-05
457.043	2e-05	1e-05	2e-05	0	2e-05	2e-05	2e-05	1e-05	1e-05	1e-05	2e-05	1e-05	2e-05	2e-05	2e-05	2e-05	1e-05	1e-05	1e-05	0	0	2e-05	1e-05	1e-05	1e-05	2e-05	0	1e-05	1e-05
458.972	1e-05	1e-05	1e-05	0	2e-05	1e-05	2e-05	1e-05	1e-05	1e-05	2e-05	1e-05	1e-05	2e-05	2e-05	2e-05	1e-05	1e-05	1e-05	0	1e-05	3e-05	1e-05	0	3e-05	1e-05	0	0	1e-05
460.9	1e-05	1e-05	2e-05	0	1e-05	2e-05	2e-05	1e-05	1e-05	1e-05	2e-05	0	1e-05	1e-05	1e-05	1e-05	2e-05	1e-05	1e-05	0	1e-05	2e-05	0	0	2e-05	1e-05	1e-05	0	1e-05
462.829	1e-05	1e-05	1e-05	0	0	2e-05	2e-05	1e-05	1e-05	1e-05	2e-05	1e-05	0	1e-05	1e-05	1e-05	1e-05	2e-05	1e-05	1e-05	1e-05	2e-05	0	1e-05	2e-05	1e-05	1e-05	0	1e-05
464.757	1e-05	1e-05	1e-05	0	0	1e-05	1e-05	1e-05	1e-05	1e-05	1e-05	2e-05	0	1e-05	1e-05	1e-05	0	2e-05	1e-05	1e-05	1e-05	1e-05	0	2e-05	1e-05	1e-05	2e-05	0	1e-05
466.686	1e-05	2e-05	1e-05	1e-05	0	1e-05	1e-05	1e-05	1e-05	1e-05	1e-05	3e-05	0	1e-05	1e-05	2e-05	0	1e-05	1e-05	1e-05	1e-05	1e-05	0	3e-05	1e-05	2e-05	2e-05	1e-05	1e-05
468.614	1e-05	2e-05	1e-05	1e-05	1e-05	1e-05	2e-05	0	1e-05	1e-05	1e-05	3e-05	1e-05	0	2e-05	2e-05	0	0	1e-05	1e-05	1e-05	0	0	2e-05	1e-05	2e-05	2e-05	1e-05	2e-05
470.543	2e-05	2e-05	2e-05	2e-05	1e-05	1e-05	2e-05	1e-05	2e-05	2e-05	1e-05	2e-05	2e-05	1e-05	2e-05	2e-05	1e-05	0	1e-05	1e-05	1e-05	0	0	2e-05	1e-05	1e-05	1e-05	1e-05	2e-05
472.471	1e-05	2e-05	1e-05	2e-05	1e-05	1e-05	1e-05	1e-05	2e-05	2e-05	2e-05	2e-05	3e-05	2e-05	1e-05	1e-05	2e-05	1e-05	3e-05	0	2e-05	0	1e-05	2e-05	0	2e-05	1e-05	1e-05	2e-05
474.4	2e-05	2e-05	2e-05	1e-05	1e-05	1e-05	0	2e-05	1e-05	3e-05	2e-05	2e-05	3e-05	2e-05	1e-05	1e-05	1e-05	2e-05	3e-05	0	2e-05	1e-05	1e-05	1e-05	1e-05	1e-05	2e-05	1e-05	1e-05
476.328	3e-05	2e-05	2e-05	1e-05	1e-05	1e-05	1e-05	2e-05	1e-05	2e-05	1e-05	2e-05	2e-05	2e-05	1e-05	1e-05	1e-05	2e-05	1e-05	0	1e-05	2e-05	0	1e-05	1e-05	0	3e-05	1e-05	0
478.256	3e-05	1e-05	2e-05	0	1e-05	1e-05	1e-05	1e-05	0	1e-05	0	2e-05	1e-05	2e-05	1e-05	0	0	1e-05	-1e-05	1e-05	-1e-05	2e-05	-1e-05	1e-05	1e-05	-1e-05	3e-05	1e-05	0
480.185	2e-05	1e-05	2e-05	0	1e-05	1e-05	2e-05	1e-05	0	1e-05	0	1e-05	1e-05	2e-05	1e-05	0	0	1e-05	-1e-05	2e-05	-1e-05	2e-05	-1e-05	1e-05	1e-05	0	3e-05	1e-05	1e-05
482.113	2e-05	1e-05	2e-05	0	1e-05	1e-05	2e-05	1e-05	1e-05	1e-05	1e-05	1e-05	2e-05	2e-05	1e-05	1e-05	1e-05	1e-05	1e-05	2e-05	-1e-05	2e-05	0	1e-05	1e-05	1e-05	3e-05	2e-05	2e-05
484.042	3e-05	2e-05	3e-05	1e-05	1e-05	1e-05	2e-05	1e-05	1e-05	1e-05	2e-05	1e-05	2e-05	2e-05	2e-05	2e-05	1e-05	1e-05	2e-05	2e-05	-1e-05	1e-05	1e-05	1e-05	2e-05	1e-05	2e-05	2e-05	2e-05
485.97	4e-05	2e-05	3e-05	1e-05	1e-05	2e-05	2e-05	1e-05	1e-05	1e-05	2e-05	0	2e-05	2e-05	2e-05	2e-05	0	1e-05	2e-05	1e-05	-1e-05	1e-05	2e-05	2e-05	1e-05	1e-05	2e-05	2e-05	2e-05
487.899	4e-05	3e-05	3e-05	1e-05	1e-05	3e-05	1e-05	1e-05	2e-05	1e-05	1e-05	1e-05	1e-05	3e-05	1e-05	1e-05	0	1e-05	1e-05	1e-05	0	1e-05	2e-05	3e-05	1e-05	1e-05	1e-05	2e-05	2e-05
489.827	4e-05	2e-05	3e-05	1e-05	1e-05	2e-05	1e-05	1e-05	2e-05	1e-05	1e-05	1e-05	1e-05	3e-05	1e-05	1e-05	-1e-05	1e-05	1e-05	2e-05	1e-05	2e-05	2e-05	3e-05	1e-05	1e-05	1e-05	1e-05	1e-05
491.756	3e-05	2e-05	2e-05	1e-05	1e-05	2e-05	1e-05	2e-05	2e-05	1e-05	1e-05	2e-05	1e-05	3e-05	2e-05	1e-05	0	1e-05	1e-05	2e-05	2e-05	2e-05	2e-05	2e-05	1e-05	1e-05	1e-05	1e-05	1e-05
493.684	2e-05	2e-05	1e-05	1e-05	1e-05	2e-05	2e-05	3e-05	2e-05	1e-05	1e-05	2e-05	1e-05	3e-05	2e-05	1e-05	1e-05	1e-05	2e-05	2e-05	2e-05	2e-05	3e-05	2e-05	0	1e-05	1e-05	1e-05	1e-05
495.613	2e-05	2e-05	1e-05	1e-05	1e-05	1e-05	2e-05	3e-05	1e-05	2e-05	0	2e-05	1e-05	2e-05	1e-05	1e-05	1e-05	1e-05	2e-05	0	2e-05	2e-05	3e-05	1e-05	1e-05	1e-05	0	1e-05	1e-05
497.541	3e-05	2e-05	1e-05	1e-05	0	0	1e-05	2e-05	1e-05	2e-05	0	2e-05	1e-05	2e-05	1e-05	1e-05	1e-05	1e-05	2e-05	0	1e-05	2e-05	3e-05	1e-05	1e-05	1e-05	0	1e-05	1e-05
499.469	3e-05	1e-05	1e-05	2e-05	0	0	1e-05	1e-05	0	2e-05	1e-05	2e-05	1e-05	1e-05	0	0	2e-05	2e-05	2e-05	0	1e-05	1e-05	3e-05	1e-05	1e-05	1e-05	0	2e-05	1e-05
501.398	3e-05	0	1e-05	2e-05	1e-05	1e-05	2e-05	1e-05	1e-05	2e-05	1e-05	1e-05	2e-05	1e-05	1e-05	0	1e-05	3e-05	2e-05	1e-05	1e-05	1e-05	3e-05	1e-05	1e-05	1e-05	0	2e-05	0
503.326	3e-05	-1e-05	1e-05	1e-05	1e-05	2e-05	2e-05	1e-05	1e-05	1e-05	1e-05	1e-05	2e-05	1e-05	1e-05	0	1e-05	2e-05	2e-05	2e-05	1e-05	0	3e-05	1e-05	1e-05	1e-05	0	1e-05	0
505.255	2e-05	0	1e-05	1e-05	2e-05	2e-05	2e-05	1e-05	1e-05	1e-05	1e-05	0	2e-05	1e-05	1e-05	1e-05	1e-05	2e-05	2e-05	2e-05	2e-05	0	2e-05	1e-05	1e-05	2e-05	1e-05	1e-05	-1e-05
507.183	2e-05	1e-05	1e-05	1e-05	2e-05	2e-05	1e-05	2e-05	1e-05	1e-05	1e-05	0	2e-05	1e-05	1e-05	1e-05	1e-05	1e-05	2e-05	2e-05	2e-05	0	1e-05	2e-05	1e-05	2e-05	2e-05	1e-05	0
509.112	2e-05	1e-05	1e-05	1e-05	2e-05	1e-05	1e-05	2e-05	1e-05	0	1e-05	0	1e-05	1e-05	2e-05	2e-05	0	1e-05	1e-05	1e-05	2e-05	0	0	2e-05	2e-05	1e-05	2e-05	0	1e-05
511.04	2e-05	2e-05	0	1e-05	1e-05	1e-05	1e-05	1e-05	1e-05	0	1e-05	1e-05	1e-05	1e-05	3e-05	2e-05	0	2e-05	1e-05	1e-05	1e-05	0	0	2e-05	2e-05	0	2e-05	0	1e-05
512.969	2e-05	1e-05	1e-05	1e-05	1e-05	1e-05	1e-05	0	1e-05	1e-05	0	1e-05	1e-05	2e-05	2e-05	1e-05	1e-05	2e-05	1e-05	2e-05	1e-05	1e-05	1e-05	2e-05	2e-05	0	2e-05	0	1e-05
514.897	1e-05	1e-05	1e-05	1e-05	1e-05	1e-05	2e-05	1e-05	1e-05	2e-05	0	2e-05	1e-05	1e-05	2e-05	1e-05	1e-05	2e-05	1e-05	2e-05	0	1e-05	1e-05	1e-05	2e-05	0	1e-05	1e-05	0
516.826	1e-05	1e-05	1e-05	2e-05	1e-05	1e-05	3e-05	1e-05	1e-05	2e-05	1e-05	2e-05	1e-05	1e-05	2e-05	2e-05	1e-05	1e-05	0	1e-05	1e-05	1e-05	1e-05	1e-05	2e-05	1e-05	-1e-05	2e-05	0
518.754	0	1e-05	1e-05	2e-05	1e-05	1e-05	3e-05	1e-05	2e-05	1e-05	2e-05	1e-05	1e-05	1e-05	2e-05	1e-05	2e-05	1e-05	0	0	1e-05	1e-05	1e-05	1e-05	1e-05	1e-05	-1e-05	2e-05	1e-05
520.682	0	1e-05	2e-05	2e-05	1e-05	1e-05	3e-05	1e-05	1e-05	0	1e-05	1e-05	1e-05	1e-05	2e-05	1e-05	1e-05	1e-05	0	0	2e-05	1e-05	1e-05	1e-05	1e-05	2e-05	-1e-05	2e-05	1e-05
522.611	0	2e-05	2e-05	1e-05	1e-05	1e-05	3e-05	1e-05	1e-05	0	1e-05	1e-05	1e-05	2e-05	2e-05	2e-05	1e-05	1e-05	2e-05	1e-05	2e-05	0	0	1e-05	1e-05	2e-05	0	2e-05	0
524.539	1e-05	3e-05	2e-05	0	1e-05	2e-05	2e-05	1e-05	1e-05	0	0	1e-05	1e-05	2e-05	1e-05	2e-05	1e-05	1e-05	2e-05	1e-05	1e-05	0	-1e-05	1e-05	1e-05	2e-05	0	1e-05	0
526.468	1e-05	3e-05	1e-05	1e-05	1e-05	2e-05	1e-05	1e-05	1e-05	1e-05	0	2e-05	1e-05	2e-05	1e-05	2e-05	0	1e-05	1e-05	1e-05	1e-05	0	-1e-05	1e-05	2e-05	2e-05	0	1e-05	0
528.396	1e-05	3e-05	1e-05	1e-05	1e-05	2e-05	0	1e-05	1e-05	1e-05	0	2e-05	1e-05	2e-05	1e-05	1e-05	0	1e-05	1e-05	2e-05	1e-05	1e-05	-2e-05	1e-05	2e-05	1e-05	1e-05	2e-05	0
530.325	1e-05	2e-05	0	1e-05	0	2e-05	-1e-05	2e-05	1e-05	2e-05	0	2e-05	1e-05	2e-05	1e-05	0	1e-05	1e-05	1e-05	2e-05	1e-05	2e-05	-2e-05	0	3e-05	0	2e-05	3e-05	0
532.253	0	2e-05	0	1e-05	1e-05	2e-05	-1e-05	2e-05	2e-05	3e-05	0	1e-05	1e-05	2e-05	0	0	2e-05	0	0	3e-05	1e-05	2e-05	-1e-05	0	2e-05	0	2e-05	3e-05	1e-05
534.182	0	2e-05	1e-05	1e-05	2e-05	3e-05	0	3e-05	2e-05	3e-05	0	0	0	2e-05	0	0	2e-05	0	0	2e-05	1e-05	2e-05	0	0	1e-05	1e-05	1e-05	1e-05	1e-05
536.11	0	2e-05	1e-05	1e-05	3e-05	3e-05	1e-05	3e-05	2e-05	2e-05	0	1e-05	0	2e-05	1e-05	1e-05	0	1e-05	0	2e-05	1e-05	2e-05	1e-05	0	0	2e-05	1e-05	0	0
538.038	1e-05	3e-05	1e-05	2e-05	2e-05	3e-05	2e-05	3e-05	2e-05	2e-05	2e-05	1e-05	0	2e-05	2e-05	1e-05	0	1e-05	1e-05	2e-05	1e-05	3e-05	2e-05	-1e-05	0	1e-05	1e-05	-1e-05	0
539.967	1e-05	3e-05	-1e-05	2e-05	1e-05	2e-05	2e-05	3e-05	1e-05	1e-05	3e-05	2e-05	0	1e-05	1e-05	2e-05	1e-05	1e-05	1e-05	3e-05	2e-05	3e-05	3e-05	0	1e-05	1e-05	1e-05	-1e-05	0
541.895	1e-05	1e-05	-1e-05	2e-05	0	1e-05	2e-05	3e-05	1e-05	0	3e-05	0	0	1e-05	-1e-05	1e-05	2e-05	1e-05	1e-05	3e-05	1e-05	3e-05	3e-05	2e-05	0	2e-05	0	0	0
543.824	3e-05	0	0	3e-05	-1e-05	1e-05	2e-05	2e-05	1e-05	-1e-05	3e-05	-1e-05	0	1e-05	-2e-05	2e-05	1e-05	-1e-05	1e-05	2e-05	1e-05	3e-05	3e-05	3e-05	0	2e-05	0	1e-05	1e-05
545.752	5e-05	1e-05	2e-05	4e-05	-1e-05	1e-05	2e-05	1e-05	1e-05	-2e-05	1e-05	-2e-05	1e-05	1e-05	-1e-05	4e-05	0	-2e-05	3e-05	0	2e-05	2e-05	3e-05	3e-05	0	2e-05	0	1e-05	1e-05
547.681	5e-05	3e-05	3e-05	4e-05	0	1e-05	1e-05	1e-05	2e-05	-1e-05	1e-05	-1e-05	3e-05	1e-05	0	4e-05	0	-2e-05	5e-05	-1e-05	2e-05	2e-05	2e-05	3e-05	1e-05	2e-05	0	0	2e-05
549.609	3e-05	3e-05	2e-05	4e-05	0	3e-05	0	2e-05	1e-05	1e-05	2e-05	0	3e-05	1e-05	2e-05	2e-05	0	-2e-05	5e-05	-1e-05	2e-05	1e-05	2e-05	3e-05	2e-05	3e-05	1e-05	-1e-05	2e-05
551.538	1e-05	3e-05	1e-05	2e-05	1e-05	4e-05	1e-05	2e-05	1e-05	2e-05	3e-05	1e-05	3e-05	1e-05	3e-05	2e-05	1e-05	-1e-05	3e-05	1e-05	2e-05	1e-05	1e-05	4e-05	2e-05	3e-05	2e-05	-1e-05	2e-05
553.466	1e-05	2e-05	1e-05	1e-05	3e-05	4e-05	1e-05	1e-05	1e-05	2e-05	3e-05	1e-05	4e-05	0	2e-05	2e-05	2e-05	0	1e-05	2e-05	2e-05	0	1e-05	3e-05	2e-05	2e-05	2e-05	1e-05	2e-05
555.395	2e-05	2e-05	0	1e-05	3e-05	3e-05	2e-05	2e-05	2e-05	1e-05	2e-05	0	3e-05	0	2e-05	2e-05	2e-05	1e-05	0	3e-05	2e-05	-1e-05	3e-05	2e-05	0	2e-05	0	3e-05	2e-05
557.323	3e-05	3e-05	-1e-05	1e-05	2e-05	1e-05	3e-05	4e-05	2e-05	0	0	0	1e-05	1e-05	2e-05	1e-05	2e-05	1e-05	1e-05	3e-05	1e-05	0	5e-05	2e-05	0	3e-05	-1e-05	3e-05	2e-05
559.251	3e-05	4e-05	1e-05	2e-05	0	0	4e-05	5e-05	1e-05	0	-1e-05	1e-05	0	1e-05	3e-05	0	1e-05	1e-05	2e-05	4e-05	1e-05	1e-05	5e-05	1e-05	2e-05	4e-05	0	3e-05	1e-05
561.18	2e-05	3e-05	2e-05	2e-05	-1e-05	-1e-05	4e-05	3e-05	0	2e-05	0	3e-05	0	1e-05	3e-05	-1e-05	1e-05	2e-05	1e-05	4e-05	2e-05	2e-05	2e-05	1e-05	4e-05	5e-05	0	2e-05	0
563.108	0	2e-05	3e-05	1e-05	0	-1e-05	3e-05	2e-05	1e-05	3e-05	2e-05	3e-05	1e-05	2e-05	4e-05	0	2e-05	2e-05	1e-05	3e-05	3e-05	2e-05	0	0	5e-05	5e-05	0	2e-05	0
565.037	0	1e-05	3e-05	1e-05	0	0	2e-05	1e-05	1e-05	2e-05	2e-05	3e-05	1e-05	2e-05	3e-05	1e-05	2e-05	2e-05	1e-05	2e-05	4e-05	1e-05	0	-1e-05	5e-05	5e-05	0	3e-05	-1e-05
566.965	0	2e-05	2e-05	0	0	1e-05	1e-05	0	1e-05	1e-05	1e-05	2e-05	1e-05	2e-05	1e-05	1e-05	1e-05	2e-05	2e-05	1e-05	5e-05	1e-05	2e-05	-1e-05	6e-05	3e-05	0	4e-05	-1e-05
568.894	1e-05	2e-05	2e-05	0	1e-05	2e-05	1e-05	0	0	1e-05	0	2e-05	0	2e-05	-1e-05	1e-05	1e-05	2e-05	3e-05	0	5e-05	1e-05	4e-05	0	4e-05	2e-05	0	3e-05	1e-05
570.822	2e-05	2e-05	2e-05	1e-05	2e-05	2e-05	1e-05	1e-05	0	0	-1e-05	3e-05	0	1e-05	-3e-05	3e-05	2e-05	2e-05	3e-05	0	4e-05	0	3e-05	1e-05	3e-05	0	-1e-05	2e-05	2e-05
572.751	3e-05	1e-05	1e-05	2e-05	2e-05	1e-05	1e-05	3e-05	0	1e-05	0	2e-05	1e-05	1e-05	-3e-05	3e-05	2e-05	2e-05	3e-05	1e-05	3e-05	1e-05	2e-05	0	2e-05	0	-1e-05	2e-05	2e-05
574.679	3e-05	0	1e-05	2e-05	2e-05	1e-05	1e-05	4e-05	1e-05	1e-05	1e-05	0	2e-05	0	0	1e-05	2e-05	2e-05	3e-05	2e-05	3e-05	2e-05	0	1e-05	1e-05	1e-05	-1e-05	1e-05	2e-05
576.608	1e-05	1e-05	2e-05	2e-05	1e-05	0	0	4e-05	1e-05	1e-05	2e-05	0	2e-05	0	1e-05	0	2e-05	1e-05	2e-05	1e-05	1e-05	2e-05	0	2e-05	1e-05	1e-05	0	1e-05	1e-05
578.536	0	3e-05	4e-05	2e-05	1e-05	0	-1e-05	2e-05	1e-05	1e-05	2e-05	0	1e-05	2e-05	1e-05	0	1e-05	1e-05	1e-05	1e-05	1e-05	1e-05	1e-05	3e-05	2e-05	2e-05	1e-05	1e-05	2e-05
580.464	1e-05	4e-05	4e-05	2e-05	1e-05	0	-1e-05	1e-05	1e-05	2e-05	2e-05	0	1e-05	2e-05	1e-05	2e-05	1e-05	1e-05	2e-05	1e-05	2e-05	1e-05	2e-05	3e-05	3e-05	3e-05	2e-05	3e-05	3e-05
582.393	2e-05	4e-05	3e-05	2e-05	5e-05	1e-05	1e-05	1e-05	1e-05	3e-05	2e-05	1e-05	1e-05	3e-05	1e-05	3e-05	1e-05	0	2e-05	2e-05	3e-05	3e-05	3e-05	2e-05	4e-05	2e-05	3e-05	4e-05	4e-05
584.321	2e-05	5e-05	0	2e-05	0.00013	3e-05	2e-05	0	1e-05	2e-05	2e-05	3e-05	3e-05	5e-05	1e-05	3e-05	0	1e-05	1e-05	3e-05	2e-05	6e-05	3e-05	2e-05	3e-05	1e-05	4e-05	4e-05	4e-05
586.25	3e-05	5e-05	-1e-05	2e-05	0.0002	4e-05	2e-05	0	1e-05	1e-05	2e-05	4e-05	5e-05	8e-05	0	2e-05	0	2e-05	1e-05	3e-05	2e-05	7e-05	3e-05	2e-05	2e-05	1e-05	4e-05	3e-05	3e-05
588.178	3e-05	4e-05	0	2e-05	0.00016	3e-05	1e-05	1e-05	2e-05	0	2e-05	4e-05	4e-05	6e-05	-1e-05	2e-05	0	2e-05	1e-05	3e-05	2e-05	4e-05	3e-05	1e-05	1e-05	1e-05	3e-05	2e-05	1e-05
590.107	3e-05	3e-05	2e-05	1e-05	6e-05	2e-05	2e-05	1e-05	2e-05	0	1e-05	4e-05	2e-05	2e-05	-1e-05	1e-05	0	2e-05	0	2e-05	2e-05	1e-05	2e-05	-1e-05	1e-05	1e-05	2e-05	2e-05	1e-05
592.035	2e-05	3e-05	1e-05	1e-05	0	1e-05	1e-05	1e-05	1e-05	0	0	3e-05	0	1e-05	0	1e-05	0	1e-05	1e-05	1e-05	2e-05	0	2e-05	-1e-05	2e-05	1e-05	2e-05	2e-05	1e-05
593.964	2e-05	3e-05	0	1e-05	0	2e-05	0	1e-05	0	1e-05	0	2e-05	0	2e-05	0	0	0	1e-05	3e-05	2e-05	2e-05	0	1e-05	0	2e-05	2e-05	3e-05	1e-05	1e-05
595.892	2e-05	3e-05	-1e-05	1e-05	0	3e-05	-1e-05	1e-05	1e-05	1e-05	0	1e-05	-1e-05	2e-05	0	0	1e-05	1e-05	3e-05	2e-05	2e-05	1e-05	0	1e-05	2e-05	1e-05	3e-05	0	1e-05
597.821	2e-05	2e-05	-1e-05	1e-05	0	3e-05	-1e-05	2e-05	1e-05	1e-05	1e-05	1e-05	-1e-05	2e-05	-1e-05	0	1e-05	1e-05	2e-05	1e-05	1e-05	1e-05	-1e-05	2e-05	2e-05	0	2e-05	0	1e-05
599.749	3e-05	2e-05	0	1e-05	1e-05	2e-05	1e-05	1e-05	0	2e-05	1e-05	1e-05	0	1e-05	0	1e-05	0	1e-05	2e-05	1e-05	1e-05	0	-1e-05	2e-05	2e-05	-1e-05	2e-05	1e-05	1e-05
601.677	3e-05	1e-05	1e-05	-1e-05	2e-05	2e-05	3e-05	0	0	2e-05	2e-05	1e-05	2e-05	0	2e-05	3e-05	-1e-05	1e-05	2e-05	1e-05	1e-05	0	-1e-05	-1e-05	2e-05	0	3e-05	1e-05	2e-05
603.606	3e-05	0	2e-05	-2e-05	2e-05	2e-05	3e-05	0	1e-05	1e-05	2e-05	1e-05	4e-05	0	3e-05	4e-05	-1e-05	0	2e-05	2e-05	1e-05	1e-05	0	-2e-05	2e-05	1e-05	2e-05	2e-05	1e-05
605.534	2e-05	-1e-05	3e-05	-1e-05	2e-05	3e-05	2e-05	1e-05	1e-05	1e-05	2e-05	2e-05	4e-05	0	3e-05	3e-05	1e-05	0	2e-05	2e-05	1e-05	1e-05	0	0	1e-05	2e-05	1e-05	3e-05	0
607.463	1e-05	0	4e-05	0	2e-05	2e-05	1e-05	3e-05	2e-05	1e-05	1e-05	1e-05	2e-05	1e-05	2e-05	2e-05	3e-05	0	1e-05	3e-05	0	0	0	1e-05	0	3e-05	1e-05	3e-05	-1e-05
609.391	1e-05	1e-05	3e-05	0	1e-05	1e-05	-1e-05	4e-05	1e-05	1e-05	2e-05	1e-05	1e-05	2e-05	0	0	3e-05	0	1e-05	3e-05	1e-05	1e-05	-1e-05	2e-05	0	3e-05	0	3e-05	-1e-05
611.32	2e-05	1e-05	2e-05	-1e-05	1e-05	1e-05	-4e-05	3e-05	0	0	1e-05	0	0	3e-05	-1e-05	0	2e-05	1e-05	1e-05	3e-05	1e-05	2e-05	0	2e-05	1e-05	3e-05	0	3e-05	2e-05
613.248	4e-05	1e-05	2e-05	-2e-05	1e-05	1e-05	-5e-05	1e-05	0	0	1e-05	0	0	4e-05	-1e-05	0	1e-05	1e-05	1e-05	4e-05	1e-05	2e-05	0	2e-05	2e-05	2e-05	0	2e-05	6e-05
615.177	6e-05	1e-05	2e-05	-3e-05	1e-05	3e-05	-2e-05	2e-05	0	1e-05	2e-05	1e-05	0	3e-05	0	-1e-05	3e-05	0	2e-05	3e-05	2e-05	2e-05	-1e-05	0	2e-05	2e-05	0	1e-05	8e-05
617.105	7e-05	2e-05	1e-05	-4e-05	-2e-05	6e-05	3e-05	5e-05	1e-05	2e-05	3e-05	2e-05	0	1e-05	2e-05	-3e-05	6e-05	-1e-05	3e-05	2e-05	1e-05	4e-05	-2e-05	-2e-05	2e-05	2e-05	3e-05	0	7e-05
619.034	6e-05	3e-05	1e-05	0	-6e-05	7e-05	3e-05	4e-05	1e-05	2e-05	1e-05	1e-05	-1e-05	0	4e-05	-2e-05	6e-05	0	4e-05	1e-05	0	6e-05	-1e-05	-2e-05	2e-05	2e-05	6e-05	-1e-05	5e-05
620.962	6e-05	3e-05	3e-05	5e-05	-6e-05	6e-05	3e-05	1e-05	1e-05	2e-05	-3e-05	0	-2e-05	1e-05	4e-05	2e-05	6e-05	2e-05	2e-05	1e-05	0	1e-05	-2e-05	1e-05	2e-05	2e-05	7e-05	0	7e-05
622.89	6e-05	2e-05	5e-05	7e-05	-2e-05	5e-05	7e-05	0	1e-05	3e-05	-5e-05	0	-1e-05	1e-05	2e-05	5e-05	7e-05	4e-05	0	1e-05	-1e-05	-8e-05	-1e-05	5e-05	1e-05	2e-05	6e-05	1e-05	0.00011
624.819	4e-05	2e-05	7e-05	8e-05	4e-05	3e-05	0.00014	0	1e-05	2e-05	-1e-05	0	0	4e-05	0	6e-05	7e-05	5e-05	0	2e-05	-2e-05	-0.0001	4e-05	7e-05	2e-05	1e-05	4e-05	1e-05	0.0001
626.747	2e-05	2e-05	6e-05	9e-05	8e-05	0	0.00019	-1e-05	2e-05	2e-05	5e-05	0	1e-05	9e-05	0	9e-05	4e-05	7e-05	0	1e-05	-1e-05	-4e-05	9e-05	8e-05	2e-05	1e-05	0	1e-05	7e-05
628.676	8e-05	3e-05	2e-05	0.00012	6e-05	-2e-05	0.00015	1e-05	2e-05	1e-05	8e-05	0	5e-05	0.00013	0	0.0001	2e-05	5e-05	-2e-05	1e-05	-1e-05	6e-05	7e-05	7e-05	1e-05	1e-05	-4e-05	2e-05	6e-05
630.604	0.00014	3e-05	2e-05	0.00015	2e-05	1e-05	7e-05	6e-05	1e-05	1e-05	8e-05	0	0.00012	0.00012	1e-05	7e-05	2e-05	0	-2e-05	0	0	9e-05	4e-05	7e-05	0	0	-3e-05	4e-05	5e-05
632.533	0.00013	3e-05	6e-05	0.00017	1e-05	3e-05	5e-05	9e-05	0	1e-05	5e-05	0	0.00013	8e-05	3e-05	5e-05	2e-05	-4e-05	0	0	0	3e-05	0.0001	0.00011	1e-05	-1e-05	1e-05	4e-05	2e-05
634.461	9e-05	2e-05	7e-05	0.00018	2e-05	3e-05	0.00012	6e-05	0	0	1e-05	1e-05	8e-05	5e-05	3e-05	3e-05	2e-05	-1e-05	0	1e-05	0	0	0.00017	0.00014	1e-05	-1e-05	1e-05	5e-05	-4e-05
636.39	8e-05	0	9e-05	0.00013	3e-05	5e-05	0.00019	3e-05	0	-1e-05	-2e-05	0	4e-05	6e-05	3e-05	-1e-05	4e-05	0	-2e-05	3e-05	-1e-05	2e-05	0.00014	0.00014	1e-05	0	-5e-05	7e-05	-7e-05
638.318	0.00013	2e-05	0.00011	8e-05	4e-05	7e-05	0.00023	7e-05	0	0	0	0	1e-05	6e-05	6e-05	-3e-05	2e-05	-1e-05	-4e-05	4e-05	-1e-05	4e-05	0.00013	0.00013	1e-05	0	-7e-05	8e-05	-4e-05
640.247	0.00014	4e-05	0.00011	7e-05	0.0001	6e-05	0.00024	0.00014	1e-05	1e-05	4e-05	0	3e-05	6e-05	8e-05	1e-05	-1e-05	1e-05	-3e-05	3e-05	1e-05	1e-05	0.00018	0.00013	0	-1e-05	0	9e-05	2e-05
642.175	5e-05	3e-05	0.00011	8e-05	0.00016	4e-05	0.00014	0.0002	2e-05	0	5e-05	-1e-05	4e-05	7e-05	9e-05	4e-05	-1e-05	7e-05	1e-05	2e-05	2e-05	-3e-05	0.0002	0.00011	-1e-05	-1e-05	8e-05	0.00011	3e-05
644.103	-3e-05	1e-05	0.00014	0.0001	0.00013	1e-05	2e-05	0.00019	1e-05	-1e-05	3e-05	-1e-05	3e-05	0.0001	0.00011	5e-05	2e-05	0.00011	3e-05	1e-05	3e-05	-1e-05	0.00012	0.0001	-2e-05	-1e-05	8e-05	8e-05	5e-05
646.032	-6e-05	6e-05	0.00017	8e-05	1e-05	3e-05	2e-05	0.00015	0	-2e-05	2e-05	0	8e-05	0.00014	0.00015	0.00012	4e-05	9e-05	2e-05	0	2e-05	5e-05	0	6e-05	-2e-05	0	5e-05	4e-05	8e-05
647.96	-5e-05	0.00012	0.00016	3e-05	-6e-05	0.00016	7e-05	0.00014	-1e-05	-1e-05	3e-05	1e-05	0.00016	0.00014	0.00018	0.0002	5e-05	6e-05	1e-05	-3e-05	0	5e-05	-6e-05	3e-05	-2e-05	0	0	3e-05	8e-05
649.889	-5e-05	0.00014	9e-05	4e-05	-1e-05	0.0003	6e-05	0.00012	-1e-05	0	4e-05	1e-05	0.00013	0.00011	0.00016	0.00017	9e-05	5e-05	0	-7e-05	0	2e-05	-3e-05	2e-05	-2e-05	1e-05	-4e-05	3e-05	9e-05
651.817	2e-05	9e-05	4e-05	0.00015	0.00013	0.00029	5e-05	6e-05	0	1e-05	6e-05	1e-05	5e-05	8e-05	0.0001	0.00011	0.00011	2e-05	-3e-05	-9e-05	0	4e-05	7e-05	5e-05	-2e-05	0	-6e-05	2e-05	0.0001
653.746	0.0001	5e-05	0.00011	0.0003	0.00022	0.00014	8e-05	1e-05	0	1e-05	0.0001	3e-05	9e-05	7e-05	-1e-05	0.0001	5e-05	0	-3e-05	-0.0001	0	0.00014	0.00023	5e-05	1e-05	7e-05	-1e-05	-1e-05	8e-05
655.674	0.00017	0.00011	0.00022	0.00036	0.00019	3e-05	7e-05	4e-05	0	0	0.00013	6e-05	0.00026	5e-05	-7e-05	0.0001	0	1e-05	0	-0.00012	1e-05	0.00026	0.00036	5e-05	0.00012	0.00029	0.00019	-5e-05	2e-05
657.603	0.00023	0.00024	0.00024	0.00023	0.00011	0	2e-05	0.0001	7e-05	-1e-05	0.00011	0.00016	0.00027	3e-05	-4e-05	7e-05	1e-05	2e-05	0.00012	-9e-05	2e-05	0.00035	0.00037	7e-05	0.00037	0.00051	0.00039	-9e-05	-1e-05
659.531	0.00026	0.00031	0.00016	5e-05	5e-05	-1e-05	-1e-05	0.00013	0.00025	1e-05	0.0001	0.00033	0.0001	0	1e-05	2e-05	2e-05	4e-05	0.00044	4e-05	0.00013	0.00035	0.00024	7e-05	0.0007	0.00048	0.00038	-4e-05	-1e-05
661.46	0.00028	0.00031	5e-05	-3e-05	2e-05	-1e-05	-1e-05	0.00014	0.00036	0.00022	0.00017	0.00036	0	0	2e-05	1e-05	2e-05	7e-05	0.0008	0.00012	0.00045	0.00025	5e-05	5e-05	0.00075	0.00025	0.00022	8e-05	1e-05
663.388	0.0002	0.0003	-2e-05	-2e-05	1e-05	0	0	0.00011	0.00025	0.00058	0.00025	0.00021	0	1e-05	0	1e-05	2e-05	8e-05	0.00083	6e-05	0.00082	0.00011	-6e-05	6e-05	0.00041	9e-05	6e-05	0.00018	3e-05
665.316	5e-05	0.00022	-3e-05	0	2e-05	1e-05	0	4e-05	5e-05	0.00071	0.00021	6e-05	0	0	0	1e-05	2e-05	6e-05	0.00062	4e-05	0.00089	2e-05	-4e-05	0.00016	8e-05	3e-05	-1e-05	0.00021	3e-05
667.245	0	7e-05	-2e-05	1e-05	1e-05	1e-05	1e-05	1e-05	-2e-05	0.00043	8e-05	1e-05	0	-1e-05	1e-05	0	2e-05	3e-05	0.00045	0.00027	0.00061	0	-1e-05	0.00032	0	1e-05	-2e-05	0.00011	2e-05
669.173	1e-05	0	-2e-05	1e-05	1e-05	1e-05	1e-05	0	-1e-05	0.00012	2e-05	1e-05	0	0	2e-05	1e-05	1e-05	1e-05	0.00022	0.00063	0.00024	1e-05	1e-05	0.00036	0	0	-1e-05	0	0
671.102	1e-05	0	-2e-05	1e-05	1e-05	1e-05	1e-05	-1e-05	-1e-05	1e-05	2e-05	1e-05	0	1e-05	2e-05	1e-05	1e-05	1e-05	2e-05	0.00075	4e-05	2e-05	1e-05	0.00021	-1e-05	-1e-05	1e-05	-2e-05	0
673.03	1e-05	-1e-05	-2e-05	1e-05	1e-05	1e-05	1e-05	-1e-05	0	-1e-05	1e-05	1e-05	0	1e-05	2e-05	1e-05	1e-05	2e-05	1e-05	0.00048	1e-05	1e-05	2e-05	6e-05	-1e-05	-2e-05	2e-05	0	0
674.959	1e-05	0	-1e-05	1e-05	1e-05	1e-05	1e-05	-1e-05	0	-1e-05	1e-05	1e-05	0	1e-05	2e-05	1e-05	2e-05	2e-05	4e-05	0.00015	2e-05	0	3e-05	2e-05	-2e-05	-2e-05	2e-05	0	0
676.887	2e-05	1e-05	0	1e-05	2e-05	1e-05	2e-05	0	0	0	0	1e-05	0	1e-05	2e-05	1e-05	2e-05	2e-05	3e-05	0	1e-05	0	4e-05	2e-05	-2e-05	0	1e-05	-1e-05	0
678.816	2e-05	2e-05	1e-05	1e-05	4e-05	2e-05	2e-05	1e-05	0	0	-2e-05	1e-05	0	1e-05	2e-05	1e-05	1e-05	2e-05	1e-05	-3e-05	-1e-05	1e-05	3e-05	2e-05	-1e-05	0	1e-05	-2e-05	0
680.744	1e-05	1e-05	2e-05	2e-05	4e-05	2e-05	3e-05	0	1e-05	1e-05	-3e-05	1e-05	0	2e-05	1e-05	1e-05	1e-05	2e-05	-2e-05	-3e-05	-2e-05	0	1e-05	3e-05	-1e-05	-1e-05	1e-05	-1e-05	0
682.672	1e-05	0	2e-05	3e-05	3e-05	3e-05	4e-05	0	1e-05	2e-05	-2e-05	1e-05	0	3e-05	1e-05	1e-05	2e-05	1e-05	-1e-05	-3e-05	-2e-05	0	0	2e-05	0	-2e-05	2e-05	-1e-05	1e-05
684.601	2e-05	0	2e-05	3e-05	1e-05	3e-05	4e-05	0	1e-05	2e-05	0	0	0	3e-05	0	2e-05	2e-05	0	2e-05	-1e-05	-3e-05	0	0	0	1e-05	-1e-05	2e-05	1e-05	1e-05
686.529	3e-05	1e-05	1e-05	3e-05	0	4e-05	5e-05	0	0	2e-05	0	0	1e-05	3e-05	0	2e-05	2e-05	0	7e-05	0	-2e-05	0	1e-05	0	3e-05	2e-05	2e-05	3e-05	2e-05
688.458	2e-05	3e-05	1e-05	2e-05	1e-05	3e-05	4e-05	-1e-05	0	1e-05	-1e-05	1e-05	2e-05	3e-05	1e-05	2e-05	1e-05	1e-05	9e-05	3e-05	-2e-05	0	3e-05	1e-05	2e-05	3e-05	2e-05	4e-05	2e-05
690.386	2e-05	3e-05	1e-05	2e-05	2e-05	2e-05	3e-05	0	2e-05	1e-05	-1e-05	2e-05	2e-05	2e-05	1e-05	2e-05	1e-05	1e-05	7e-05	5e-05	-2e-05	0	4e-05	1e-05	0	4e-05	1e-05	3e-05	3e-05
692.315	4e-05	1e-05	2e-05	1e-05	2e-05	2e-05	3e-05	1e-05	3e-05	0	0	4e-05	2e-05	2e-05	2e-05	2e-05	1e-05	2e-05	2e-05	5e-05	-2e-05	2e-05	5e-05	0	-2e-05	3e-05	-1e-05	2e-05	3e-05
694.243	6e-05	0	3e-05	0	3e-05	3e-05	4e-05	2e-05	3e-05	0	2e-05	3e-05	2e-05	3e-05	3e-05	1e-05	1e-05	2e-05	2e-05	3e-05	1e-05	5e-05	7e-05	0	-3e-05	3e-05	0	2e-05	2e-05
696.172	7e-05	0	3e-05	1e-05	4e-05	4e-05	5e-05	3e-05	3e-05	1e-05	4e-05	3e-05	2e-05	5e-05	3e-05	1e-05	2e-05	3e-05	6e-05	0	1e-05	6e-05	8e-05	-1e-05	-3e-05	4e-05	1e-05	1e-05	1e-05
698.1	5e-05	0	3e-05	3e-05	5e-05	4e-05	5e-05	2e-05	3e-05	3e-05	4e-05	3e-05	2e-05	7e-05	3e-05	3e-05	3e-05	3e-05	8e-05	-2e-05	-1e-05	4e-05	5e-05	0	-1e-05	2e-05	3e-05	1e-05	1e-05
700.029	2e-05	2e-05	4e-05	3e-05	5e-05	4e-05	5e-05	2e-05	3e-05	3e-05	3e-05	3e-05	2e-05	6e-05	3e-05	4e-05	4e-05	2e-05	7e-05	0	-1e-05	3e-05	1e-05	2e-05	-1e-05	0	3e-05	2e-05	1e-05
701.957	1e-05	4e-05	6e-05	5e-05	4e-05	4e-05	5e-05	2e-05	4e-05	3e-05	2e-05	3e-05	2e-05	5e-05	4e-05	4e-05	4e-05	2e-05	6e-05	3e-05	0	2e-05	0	3e-05	2e-05	0	4e-05	3e-05	1e-05
703.885	0	4e-05	8e-05	8e-05	4e-05	3e-05	4e-05	2e-05	4e-05	3e-05	3e-05	3e-05	3e-05	4e-05	5e-05	4e-05	4e-05	1e-05	4e-05	3e-05	0	1e-05	3e-05	2e-05	3e-05	1e-05	4e-05	3e-05	2e-05
705.814	2e-05	3e-05	8e-05	7e-05	5e-05	4e-05	3e-05	2e-05	5e-05	4e-05	3e-05	4e-05	4e-05	3e-05	6e-05	5e-05	5e-05	1e-05	1e-05	2e-05	1e-05	3e-05	4e-05	1e-05	3e-05	3e-05	4e-05	3e-05	3e-05
707.742	3e-05	2e-05	7e-05	7e-05	6e-05	4e-05	3e-05	3e-05	4e-05	5e-05	3e-05	5e-05	5e-05	3e-05	6e-05	6e-05	5e-05	1e-05	1e-05	4e-05	1e-05	5e-05	4e-05	1e-05	4e-05	4e-05	5e-05	3e-05	4e-05
709.671	0	3e-05	6e-05	7e-05	6e-05	5e-05	4e-05	3e-05	3e-05	7e-05	6e-05	6e-05	4e-05	4e-05	6e-05	7e-05	6e-05	1e-05	5e-05	8e-05	0	6e-05	5e-05	2e-05	6e-05	4e-05	5e-05	1e-05	5e-05
711.599	-2e-05	5e-05	6e-05	6e-05	6e-05	5e-05	6e-05	3e-05	2e-05	8e-05	8e-05	7e-05	5e-05	4e-05	6e-05	7e-05	8e-05	1e-05	0.0001	8e-05	3e-05	7e-05	9e-05	4e-05	8e-05	3e-05	6e-05	1e-05	5e-05
713.528	1e-05	6e-05	7e-05	5e-05	8e-05	5e-05	8e-05	4e-05	3e-05	9e-05	8e-05	8e-05	6e-05	5e-05	6e-05	7e-05	9e-05	1e-05	0.00014	6e-05	6e-05	7e-05	0.0001	5e-05	8e-05	4e-05	6e-05	2e-05	6e-05
715.456	6e-05	5e-05	9e-05	6e-05	9e-05	7e-05	7e-05	6e-05	5e-05	8e-05	9e-05	7e-05	8e-05	4e-05	7e-05	7e-05	9e-05	2e-05	0.00013	6e-05	5e-05	6e-05	6e-05	3e-05	4e-05	7e-05	6e-05	3e-05	6e-05
717.385	9e-05	5e-05	9e-05	7e-05	8e-05	8e-05	7e-05	6e-05	6e-05	6e-05	9e-05	7e-05	8e-05	4e-05	8e-05	8e-05	9e-05	3e-05	5e-05	4e-05	1e-05	6e-05	4e-05	3e-05	2e-05	9e-05	6e-05	4e-05	7e-05
719.313	0.00014	6e-05	9e-05	7e-05	8e-05	9e-05	7e-05	7e-05	6e-05	4e-05	8e-05	8e-05	7e-05	4e-05	9e-05	9e-05	9e-05	4e-05	-5e-05	1e-05	1e-05	6e-05	6e-05	5e-05	5e-05	8e-05	5e-05	6e-05	7e-05
721.242	0.00018	6e-05	0.0001	7e-05	9e-05	9e-05	8e-05	9e-05	7e-05	5e-05	8e-05	0.0001	9e-05	6e-05	0.0001	8e-05	9e-05	5e-05	-9e-05	0	3e-05	7e-05	7e-05	8e-05	0.0001	4e-05	6e-05	8e-05	6e-05
723.17	0.00019	7e-05	0.00011	8e-05	0.0001	0.0001	9e-05	0.0001	7e-05	0.0001	9e-05	0.00011	0.00011	8e-05	0.00011	7e-05	9e-05	4e-05	-2e-05	1e-05	2e-05	8e-05	9e-05	8e-05	0.00012	1e-05	7e-05	9e-05	7e-05
725.098	0.00015	9e-05	0.00012	8e-05	0.0001	0.0001	9e-05	9e-05	8e-05	0.00013	9e-05	9e-05	0.00011	9e-05	0.0001	8e-05	9e-05	4e-05	7e-05	-3e-05	1e-05	6e-05	0.00016	5e-05	9e-05	2e-05	8e-05	9e-05	9e-05
727.027	8e-05	9e-05	0.00013	7e-05	0.0001	0.0001	9e-05	9e-05	8e-05	0.00012	9e-05	7e-05	0.0001	9e-05	0.0001	9e-05	9e-05	4e-05	-4e-05	-5e-05	4e-05	5e-05	0.00016	1e-05	2e-05	6e-05	8e-05	9e-05	0.0001
728.955	3e-05	9e-05	0.00012	8e-05	0.00012	0.00011	0.0001	8e-05	7e-05	0.0001	0.0001	7e-05	0.0001	9e-05	0.0001	0.0001	0.0001	4e-05	-0.00012	2e-05	0.0001	6e-05	9e-05	-1e-05	-1e-05	8e-05	9e-05	9e-05	9e-05
730.884	3e-05	8e-05	0.00012	9e-05	0.00013	0.00012	0.00011	7e-05	6e-05	0.0001	0.0001	8e-05	0.0001	9e-05	9e-05	0.00011	0.0001	5e-05	4e-05	0.00011	0.00017	6e-05	0.00012	0	1e-05	9e-05	0.00012	9e-05	9e-05
732.812	5e-05	8e-05	0.00013	0.0001	0.00013	0.00011	0.00012	6e-05	6e-05	0.00013	9e-05	9e-05	0.0001	9e-05	0.0001	0.00012	0.0001	6e-05	0.00043	0.00014	0.00023	4e-05	0.00029	3e-05	-1e-05	0.0001	0.00015	8e-05	8e-05
734.741	5e-05	9e-05	0.00014	0.00011	0.00014	0.0001	0.00012	7e-05	7e-05	0.00015	8e-05	0.0001	0.00011	0.0001	0.00011	0.00013	0.00011	7e-05	0.00113	0.00011	0.00023	5e-05	0.00039	9e-05	-7e-05	0.00013	0.00013	9e-05	9e-05
736.669	5e-05	9e-05	0.00013	0.00013	0.00014	0.00012	0.00012	7e-05	9e-05	0.00015	9e-05	0.0001	0.00012	0.00011	0.00011	0.00013	0.00011	7e-05	0.00164	0.00013	0.00018	6e-05	0.00039	0.00022	-5e-05	0.00016	9e-05	0.00012	9e-05
738.598	3e-05	7e-05	0.00011	0.00013	0.00013	0.00012	0.00012	7e-05	9e-05	0.00012	0.00011	0.00011	0.00012	0.00012	0.0001	0.00013	0.00011	7e-05	0.00124	0.00028	0.00014	8e-05	0.00034	0.00037	1e-05	0.00017	8e-05	0.00013	0.0001
740.526	-2e-05	6e-05	0.0001	0.00013	0.00013	0.00012	0.00012	7e-05	8e-05	0.0001	0.00012	0.00012	0.00012	0.00012	0.0001	0.00013	0.00011	6e-05	0.00036	0.00052	0.0001	0.00011	0.0003	0.00039	2e-05	0.00014	8e-05	0.00011	0.00011
742.455	1e-05	9e-05	0.00011	0.00012	0.00013	0.00011	0.00012	9e-05	8e-05	0.00011	0.00013	0.00012	0.00011	0.00014	0.0001	0.00012	0.00012	6e-05	-0.00015	0.00072	8e-05	0.00014	0.00027	0.00029	-2e-05	0.00011	8e-05	8e-05	0.0001
744.383	0.00013	0.00012	0.00012	0.00012	0.00013	0.0001	0.00013	0.00011	8e-05	0.00013	0.00013	0.00012	0.00011	0.00015	0.00011	0.00011	0.00012	7e-05	-0.00014	0.00072	0.00013	0.00015	0.00015	0.0003	-4e-05	0.0001	7e-05	8e-05	8e-05
746.311	0.00017	0.00013	0.00013	0.00012	0.00012	0.0001	0.00014	0.00012	8e-05	0.00015	0.00012	0.00011	0.00011	0.00015	0.00012	0.00012	0.00012	8e-05	0.00013	0.00051	0.00025	0.00014	0.00016	0.00037	0	0.0001	6e-05	0.0001	8e-05
748.24	0	9e-05	0.00013	0.00013	0.00012	0.00012	0.00014	0.00011	8e-05	0.00015	0.00013	0.0001	0.00012	0.00015	0.00013	0.00013	0.00012	8e-05	0.00026	0.00034	0.00039	0.00017	0.00036	0.0003	0.00014	0.0001	7e-05	0.00011	0.0001
750.168	-0.00025	7e-05	0.00013	0.00013	0.00011	0.00013	0.00013	0.00012	8e-05	0.00013	0.00014	0.0001	0.00012	0.00014	0.00013	0.00013	0.00012	7e-05	0.00014	0.0002	0.00059	0.00024	0.00041	0.00023	0.0004	8e-05	9e-05	0.00011	0.00012
752.097	-0.00029	9e-05	0.00011	0.00011	0.00011	0.00014	0.00013	0.00013	9e-05	0.00011	0.00015	0.00011	0.00011	0.00013	0.00012	0.00013	0.00012	7e-05	8e-05	6e-05	0.00068	0.00029	0.00034	0.00027	0.00062	9e-05	0.0001	0.0001	0.00013
754.025	-0.0001	6e-05	7e-05	0.0001	0.00011	0.00015	0.00013	0.00015	0.0001	8e-05	0.00016	0.00012	0.0001	0.00014	0.00013	0.00011	0.00012	9e-05	0.00016	0.00016	0.00032	0.00032	0.00034	0.00028	0.00073	0.00018	9e-05	0.0001	0.0001
755.954	0.0003	-1e-05	3e-05	0.00012	0.00011	0.00015	0.00013	0.00015	0.00011	3e-05	0.00017	0.00012	0.00011	0.00014	0.00014	0.0001	0.00012	0.0001	0.00016	0.00041	-4e-05	0.00031	0.0003	0.0003	0.00091	0.00024	7e-05	0.0001	9e-05
757.882	0.00074	-7e-05	2e-05	0.00015	0.00012	0.00015	0.00012	0.00014	0.0001	5e-05	0.00014	0.00011	0.00013	0.00014	0.00016	0.00011	0.00012	0.00011	0.00011	0.00043	0.00029	0.00023	0.00026	0.00027	0.00109	0.00015	6e-05	0.0001	0.00011
759.811	0.00076	-0.00016	9e-05	0.00014	0.00012	0.00014	0.00012	0.00012	9e-05	0.00014	8e-05	0.0001	0.00013	0.00013	0.00015	0.00013	0.00013	0.00011	0.00015	0.00025	0.00082	8e-05	0.00035	0.00027	0.00091	5e-05	6e-05	8e-05	0.00013
761.739	0.00042	-6e-05	0.00014	0.00013	0.00012	0.00011	0.00013	0.00013	0.0001	0.0002	3e-05	0.0001	0.00013	0.00012	0.00014	0.00014	0.00014	0.00011	0.00029	0.00011	0.00084	-2e-05	0.00041	0.00037	0.00056	-6e-05	9e-05	6e-05	0.00012
763.668	0.00016	0.00036	0.00013	0.00012	0.00014	9e-05	0.00015	0.00015	9e-05	0.00015	5e-05	0.00011	0.00011	0.00012	0.00015	0.00014	0.00014	0.0001	0.00039	7e-05	0.00055	1e-05	0.00026	0.00049	0.00051	-0.00021	7e-05	5e-05	0.00011
765.596	8e-05	0.00067	0.00012	0.00011	0.00015	0.0001	0.00015	0.00016	5e-05	9e-05	0.00012	0.00013	0.00012	0.00012	0.00018	0.00012	0.00012	9e-05	0.00029	0.0001	0.00035	3e-05	3e-05	0.00056	0.00053	-3e-05	0	4e-05	0.0001
767.524	6e-05	0.00062	0.00015	0.00012	0.00014	0.00013	0.00014	0.00017	2e-05	0.00012	0.00018	0.00015	0.00014	0.00012	0.00018	0.0001	0.0001	8e-05	7e-05	0.00017	0.00035	-2e-05	-5e-05	0.00047	0.00016	0.00038	6e-05	4e-05	8e-05
769.453	0.00013	0.00035	0.00018	0.00016	0.00013	0.00013	0.00014	0.00016	6e-05	0.00018	0.00018	0.00017	0.00014	0.00013	0.00016	9e-05	0.00012	7e-05	2e-05	0.00023	0.00038	0	3e-05	0.00029	-0.00016	0.00052	0.00022	3e-05	0.00011
771.381	0.00024	0	0.00023	0.00021	0.00013	0.00013	0.00014	0.00016	0.00013	0.00025	0.00016	0.00016	0.0001	0.00014	0.00013	9e-05	0.00013	7e-05	0.00011	0.0002	0.00024	0.00023	0.00011	0.00024	-7e-05	0.00055	0.00027	4e-05	0.00017
773.31	7e-05	0	0.00027	0.00021	0.00013	0.00013	0.00014	0.00017	0.00016	0.00025	0.00012	0.00014	7e-05	0.00014	0.00012	0.0001	0.00013	9e-05	0.00012	0.00014	0	0.00053	0.00011	0.00026	6e-05	0.00057	0.00022	5e-05	0.00021
775.238	-0.00013	0.00051	0.00022	0.00016	0.00014	0.00013	0.00012	0.00017	0.00016	0.00015	6e-05	0.00013	6e-05	0.00013	0.00013	9e-05	0.00013	0.0001	0.00013	0.00014	-0.00011	0.00059	0.00011	0.00022	5e-05	0.00034	0.00021	8e-05	0.00023
777.167	-4e-05	0.00093	9e-05	0.00011	0.00015	0.00012	9e-05	0.00014	0.00014	2e-05	3e-05	0.00013	4e-05	0.0001	0.00013	8e-05	0.00014	0.00011	0.00019	0.00019	-5e-05	0.00055	8e-05	0.00016	-1e-05	0.00018	0.0002	0.00011	0.00026
779.095	0.0002	0.00088	-5e-05	0.0001	0.00014	0.00012	9e-05	9e-05	0.00014	-6e-05	3e-05	9e-05	3e-05	7e-05	0.00013	7e-05	0.00013	0.00011	0.00023	0.00021	0.00011	0.00051	4e-05	0.00015	-3e-05	0.00027	0.00018	0.00014	0.00028
781.024	0.00025	0.0006	-7e-05	0.00015	0.00013	0.00012	0.00011	5e-05	0.00012	-3e-05	2e-05	1e-05	5e-05	5e-05	0.00015	7e-05	0.0001	0.0001	0.00018	0.00016	0.00021	0.00034	5e-05	0.00016	2e-05	0.00027	0.00028	0.00017	0.00026
782.952	0.00016	0.00039	1e-05	0.00018	0.00013	0.00012	0.00012	5e-05	4e-05	9e-05	3e-05	0	9e-05	6e-05	0.00015	9e-05	9e-05	0.0001	0.0001	9e-05	0.00018	0.00023	8e-05	0.00016	0.00014	0.0002	0.00062	0.00013	0.00026
784.881	0.00018	0.00026	4e-05	0.00016	0.00017	8e-05	0.0001	0.0001	-3e-05	0.0002	9e-05	8e-05	0.00011	0.00011	0.00011	0.0001	9e-05	0.00012	0.0001	6e-05	0.00014	0.00026	8e-05	0.00017	0.00017	0.00031	0.00093	7e-05	0.00033
786.809	0.0002	0.00018	-1e-05	0.00012	0.00023	3e-05	7e-05	0.00013	2e-05	0.00028	0.00016	0.00016	0.0001	0.00013	9e-05	0.00012	0.00011	0.00013	0.00014	8e-05	0.00016	0.00024	0.00011	0.00017	0.0001	0.0004	0.00087	0.00016	0.00042
788.737	0.00015	0.00025	0	0.00013	0.00027	0	6e-05	0.00014	0.00011	0.00036	0.0002	0.0002	8e-05	0.00014	9e-05	0.00013	0.00012	0.00013	0.00014	0.0001	0.00018	0.00016	0.00015	0.00017	4e-05	0.00041	0.00074	0.00034	0.00044
790.666	8e-05	0.00033	2e-05	0.00014	0.00025	0	0.0001	0.00013	0.00013	0.00044	0.00014	0.0002	0.0001	0.00013	0.0001	0.0001	0.00015	0.00013	0.00017	0.00012	0.00023	0.0001	0.00016	0.00018	8e-05	0.00043	0.00079	0.00039	0.00038
792.594	8e-05	0.00027	0	0.0001	0.00018	2e-05	0.00015	0.0001	6e-05	0.00057	-4e-05	0.00017	0.00012	0.00011	0.0001	8e-05	0.00018	0.00014	0.00021	0.00013	0.00027	0.00016	0.00016	0.00016	0.00016	0.00025	0.00072	0.00035	0.00016
794.523	0.00016	9e-05	0	3e-05	0.00014	5e-05	0.00016	8e-05	-2e-05	0.00076	-0.00023	0.00013	0.00011	0.00011	9e-05	7e-05	0.00019	0.00016	0.00017	0.00017	0.00019	0.00028	0.00016	9e-05	0.00019	-9e-05	0.00038	0.00049	-0.00011
796.451	0.00022	-4e-05	-2e-05	5e-05	0.00012	6e-05	0.00012	0.00016	7e-05	0.00098	-0.00032	0.00012	9e-05	9e-05	0.0001	7e-05	0.00015	0.00018	0.00013	0.00025	8e-05	0.00031	0.00013	3e-05	0.00017	-0.0002	1e-05	0.00068	-2e-05
798.38	0.00024	-3e-05	0.00013	0.00013	4e-05	7e-05	9e-05	0.00022	0.00031	0.00139	-0.00025	5e-05	8e-05	5e-05	0.00012	7e-05	0.0001	0.0002	0.00015	0.00027	5e-05	0.00023	0.00011	4e-05	0.00017	-4e-05	-0.00011	0.0005	0.00044
800.308	0.00025	-2e-05	0.00074	0.00011	-2e-05	0.00011	8e-05	0.00017	0.00043	0.0016	-0.0001	-6e-05	0.0001	0	0.00014	0.00011	6e-05	0.00018	0.00017	0.00019	6e-05	0.00018	0.00015	8e-05	0.00018	8e-05	-1e-05	0.00016	0.00078
802.237	0.00025	-5e-05	0.00159	-0.00011	2e-05	0.00013	9e-05	0.00013	0.00038	0.00094	-2e-05	-0.00011	0.00012	-1e-05	0.00016	0.00017	7e-05	0.00013	0.00016	0.00012	6e-05	0.00018	0.0002	0.00012	0.00013	4e-05	0.0001	-6e-05	0.00086
804.165	0.00023	-3e-05	0.00179	-0.00015	0.0001	9e-05	0.00013	0.00016	0.00037	0.0003	-0.00011	-5e-05	0.00013	0	0.00015	0.00017	8e-05	9e-05	0.00015	0.0001	0.0001	0.00015	0.00022	0.00017	9e-05	1e-05	0.0001	-0.00011	0.00078
806.093	0.00018	5e-05	0.00094	3e-05	0.00019	7e-05	0.00018	0.00032	0.00033	0.00016	-0.00027	7e-05	0.00015	4e-05	0.0001	0.00011	7e-05	0.0001	0.00016	9e-05	0.00017	9e-05	0.00021	0.0002	0.00014	0.0001	0.0001	7e-05	0.00048
808.022	0.00015	0.00013	-0.00028	6e-05	0.0002	0.00012	0.00021	0.00051	0.00031	6e-05	0.00021	0.00022	0.00023	0.00013	8e-05	5e-05	9e-05	0.00014	0.00016	0.00012	0.00021	2e-05	0.0002	0.00021	0.00021	0.00021	0.00012	0.00026	0.00012
809.95	0.00018	0.00015	-0.00074	5e-05	0.00012	0.0002	0.00019	0.00031	0.00034	-0.00026	0.00148	0.00031	0.00029	0.00024	0.00012	8e-05	0.00013	0.00017	0.00014	0.00016	0.00022	-2e-05	0.0002	0.0002	0.00025	0.00024	0.00015	0.00034	-3e-05
811.879	0.00023	0.00012	-0.00013	0.00065	0.00011	0.00025	0.00013	0	0.00022	-0.00044	0.00282	0.00026	0.00036	0.00028	0.00021	0.00012	0.00016	0.00018	0.00011	0.00017	0.00018	0	0.00019	0.00019	0.00022	0.00021	0.00021	0.00037	-8e-05
813.807	0.00027	9e-05	0.00057	0.00141	0.00021	0.00024	7e-05	0.00039	1e-05	4e-05	0.00364	0.00022	0.00045	0.00025	0.00027	0.00014	0.00013	0.00018	0.0001	0.00015	9e-05	0.00014	0.00018	0.00017	0.00018	0.00015	0.00029	0.0003	-3e-05
815.736	0.00027	6e-05	0.00067	0.0014	0.00028	0.00022	8e-05	0.00127	-7e-05	0.00053	0.00348	0.00038	0.00045	0.00024	0.00026	0.00017	0.00013	0.00019	0.00012	0.00011	6e-05	0.00029	0.00019	0.00017	0.00016	0.00012	0.00032	0.00015	0.00011
817.664	0.00023	5e-05	0.0004	0.00141	0.00019	0.00021	0.00016	0.00187	-0.00012	0.00054	0.00206	0.00065	0.00037	0.00027	0.00022	0.00019	0.00017	0.0002	0.00011	8e-05	9e-05	0.00033	0.0002	0.00019	0.00016	0.00012	0.00028	5e-05	0.00019
819.593	0.00022	9e-05	0.0002	0.00206	3e-05	0.00024	0.00023	0.00193	-0.0002	0.00033	0.00045	0.00095	0.00036	0.00028	0.00017	0.00016	0.00021	0.00018	0.0001	7e-05	0.00015	0.00028	0.00021	0.00021	0.00012	0.00013	0.0002	0.0001	0.00028
821.521	0.00025	0.00013	0.00015	0.00225	-7e-05	0.0003	0.00023	0.0014	-0.00019	0.00011	0	0.00117	0.00044	0.00021	0.00011	0.00011	0.00021	0.0001	0.00012	0.00011	0.0002	0.00026	0.00021	0.00022	9e-05	0.00012	0.00012	0.00017	0.00033
823.45	0.00026	0.00012	0.00015	0.00175	0.00024	0.00024	0.00019	0.00066	-5e-05	-3e-05	0.00029	0.00094	0.00058	0.00014	9e-05	0.00011	0.00021	5e-05	0.00016	0.00018	0.00023	0.00025	0.00017	0.00022	0.00014	0.00015	0.00013	7e-05	0.00015
825.378	0.00025	0.0001	0.00019	0.00126	0.00107	2e-05	0.00019	0.00045	0	-5e-05	0.00029	0.00021	0.00069	0.00021	9e-05	0.00017	0.00023	0.00012	0.00024	0.00023	0.00025	0.0002	0.00015	0.00021	0.00019	0.00014	0.00019	-1e-05	-2e-05
827.306	0.00024	0.00014	0.00023	0.00088	0.0019	-3e-05	0.00022	0.00055	-8e-05	7e-05	-0.00012	-0.00039	0.00053	0.00036	9e-05	0.00019	0.00025	0.00025	0.00032	0.00025	0.00025	0.00015	0.00017	0.00022	0.00021	0.00011	0.00017	0.00012	1e-05
829.235	0.00023	0.00021	0.00035	0.00052	0.00254	0.00011	0.00028	0.00062	-0.0001	0.00024	-0.00041	-0.00014	0.00012	0.00041	0.0001	0.00015	0.00025	0.00033	0.00035	0.00024	0.00019	0.00016	0.00023	0.00021	0.00021	0.00011	0.00015	0.00023	7e-05
831.163	0.00024	0.00023	0.00058	0.00028	0.00311	8e-05	0.00032	0.00085	-4e-05	0.00032	-0.0002	0.00104	-0.00018	0.00031	0.00013	0.00013	0.00024	0.00032	0.0003	0.00022	0.0001	0.00021	0.00031	0.00018	0.00018	0.00011	0.00019	0.00018	3e-05
833.092	0.00029	0.00016	0.00067	0.0001	0.00315	-0.00021	0.00031	0.00109	5e-05	0.0003	8e-05	0.00182	-0.00015	0.00028	0.00028	0.00018	0.00031	0.00026	0.00021	0.00024	5e-05	0.00025	0.00033	0.00015	0.00018	0.00011	0.00021	0.00014	3e-05
835.02	0.00032	0.00011	0.00056	-1e-05	0.0024	-0.00048	0.00029	0.0011	0.00024	0.00023	4e-05	0.00137	-0.00014	0.00033	0.00044	0.00025	0.00037	0.00018	0.00017	0.00027	8e-05	0.00029	0.00026	0.00015	0.00023	0.00012	0.00017	0.00019	0.00015
836.949	0.00028	0.00017	0.00047	-1e-05	0.0014	-0.00028	0.00025	0.00077	0.00034	0.00018	-0.00015	0.00058	0	0.00015	0.00039	0.0003	0.00027	0.00012	0.00018	0.00028	0.00015	0.0003	0.00019	0.00015	0.00027	0.00015	0.00019	0.00018	0.00026
838.877	0.00025	0.00027	0.00043	6e-05	0.00094	0.00044	0.00028	0.00024	0.00025	0.00019	-0.00011	0.00014	0.00015	-0.0002	0.00016	0.00032	0.00012	0.00015	0.00018	0.00027	0.00019	0.00025	0.00017	0.00014	0.00024	0.00014	0.00026	7e-05	0.00027
840.806	0.00027	0.00034	0.00034	0.00014	0.00103	0.00108	0.00058	-8e-05	0.00013	0.00025	-4e-05	-7e-05	-0.00023	-9e-05	-7e-05	0.0003	0.00012	0.00024	0.00017	0.00027	0.00019	0.00019	0.00021	0.00016	0.00019	0.0001	0.00026	5e-05	0.00021
842.734	0.00027	0.00034	0.00027	0.00023	0.00097	0.00119	0.00095	-0.00011	0.00016	0.00031	-6e-05	3e-05	-0.00043	0.00028	-0.00017	0.00017	0.00025	0.00028	0.00022	0.00027	0.0002	0.00016	0.00025	0.0002	0.00018	0.0001	0.0002	0.00015	0.00019
844.663	0.00026	0.00027	0.00031	0.00027	0.00071	0.00094	0.00106	-2e-05	0.00024	0.0003	2e-05	0.00031	0.00037	-8e-05	-0.00013	0	0.00036	0.0002	0.00027	0.00026	0.00022	0.00017	0.00027	0.00022	0.0002	0.00015	0.00019	0.00021	0.00022
846.591	0.00028	0.00023	0.00042	0.00026	0.00065	0.00067	0.00089	0.00021	0.00027	0.00027	0.00022	0.00041	0.00118	-0.00086	4e-05	-5e-05	0.0004	0.0001	0.0003	0.00023	0.00023	0.00022	0.00028	0.00024	0.00021	0.0002	0.00022	0.00021	0.00022
848.519	0.0003	0.00021	0.00047	0.00033	0.00056	0.00058	0.0006	0.00049	0.00028	0.00025	0.00032	0.00034	0.00122	-0.00061	0.00034	6e-05	0.00047	0.00012	0.00028	0.00022	0.00022	0.00022	0.00027	0.00026	0.00021	0.00021	0.00023	0.00023	0.00022
850.448	0.00026	0.0002	0.00043	0.00037	0.00025	0.00058	0.00059	0.00058	0.00026	0.00023	0.0003	0.00036	0.00099	0.00103	0.00076	0.00031	0.00057	0.00026	0.00025	0.00023	0.00022	0.00016	0.00025	0.00031	0.00019	0.00022	0.00018	0.00027	0.00025
852.376	0.00021	0.00021	0.00036	0.00033	0	0.00072	0.00111	0.00049	0.00022	0.00024	0.00032	0.00043	0.00085	0.00254	0.0009	0.00049	0.00059	0.00041	0.00024	0.00026	0.00025	0.00015	0.00027	0.00033	0.0002	0.00024	0.00011	0.00028	0.00025
854.305	0.00023	0.00024	0.00025	0.00036	-2e-05	0.00077	0.00151	0.00043	0.0002	0.00022	0.00038	0.00043	0.00068	0.00236	0.00061	0.00034	0.00054	0.00049	0.00025	0.00029	0.0003	0.0002	0.00027	0.00027	0.00021	0.00026	0.00013	0.00024	0.00024
856.233	0.00028	0.00025	0.00015	0.00041	9e-05	0.00054	0.00135	0.00037	0.00023	0.0002	0.00044	0.00037	0.0004	0.00135	0.00026	-2e-05	0.00055	0.00042	0.00023	0.0003	0.00033	0.00024	0.00025	0.00023	0.00023	0.00025	0.00022	0.00021	0.00024
858.162	0.00034	0.00024	0.00014	0.00036	8e-05	0.00034	0.00128	0.00024	0.00026	0.00018	0.00044	0.00024	0.00021	0.00084	0.00042	-9e-05	0.00052	0.00024	0.00021	0.00029	0.00035	0.00025	0.00025	0.00026	0.00026	0.00022	0.00026	0.00025	0.00025
860.09	0.00039	0.00023	0.00023	0.00027	1e-05	0.00031	0.00157	9e-05	0.00025	0.00021	0.00039	0.00017	0.00042	0.00059	0.00141	0.00025	0.00024	-2e-05	0.00021	0.00028	0.00033	0.00023	0.00028	0.0003	0.0003	0.00022	0.00026	0.0003	0.00024
862.019	0.00039	0.00023	0.00032	0.00022	7e-05	0.00035	0.00148	5e-05	0.00025	0.00025	0.00033	0.00026	0.00061	0.00058	0.00266	0.00022	-0.00012	-0.00023	0.00026	0.00026	0.00033	0.00022	0.0003	0.00031	0.00032	0.00023	0.00024	0.00031	0.00022
863.947	0.00035	0.00024	0.00027	0.00019	0.00016	0.00039	0.00101	0.00018	0.00028	0.00026	0.00025	0.00036	0.00046	0.00098	0.00277	-0.00029	-4e-05	-0.00024	0.0003	0.00025	0.00033	0.00023	0.00029	0.00029	0.0003	0.00027	0.00024	0.00031	0.00023
865.876	0.00033	0.00022	0.00017	0.00024	0.00014	0.00041	0.00089	0.00034	0.00028	0.00025	0.00018	0.00039	0.00031	0.00122	0.00179	0.00025	0.00034	-0.00013	0.00032	0.00025	0.00032	0.00024	0.00026	0.00026	0.00028	0.00033	0.00028	0.00032	0.00025
867.804	0.00033	0.00021	0.00019	0.00036	0.0001	0.00041	0.00095	0.0004	0.00025	0.00028	0.00017	0.00038	0.00024	0.001	0.00123	0.00228	0.00054	0.00011	0.0003	0.00024	0.0003	0.00023	0.00023	0.00026	0.00027	0.00035	0.00032	0.00033	0.00026
869.732	0.00032	0.00024	0.00033	0.00038	0.00012	0.00036	0.00079	0.00038	0.00022	0.00032	0.00021	0.00032	0.00012	0.00066	0.00113	0.00351	0.00085	0.00066	0.0003	0.00024	0.00029	0.00024	0.00023	0.00027	0.00026	0.00033	0.00033	0.00035	0.00027
871.661	0.00031	0.0003	0.00043	0.00033	0.00022	0.00026	0.00063	0.00036	0.00021	0.00032	0.00025	0.0003	0.0001	0.00036	0.0009	0.00259	0.00157	0.00135	0.00031	0.00025	0.0003	0.00027	0.00024	0.00028	0.00027	0.00033	0.00029	0.00033	0.00029
873.589	0.00031	0.00035	0.00043	0.00033	0.00034	0.00019	0.00048	0.00038	0.00026	0.00032	0.00024	0.00035	0.0002	0.00022	0.00068	0.00091	0.00245	0.00163	0.00033	0.00026	0.0003	0.00027	0.00023	0.00027	0.0003	0.00035	0.00025	0.00029	0.00031
875.518	0.00031	0.00037	0.0004	0.00037	0.00036	0.00017	0.00017	0.00037	0.00033	0.00033	0.00024	0.00038	0.00022	0.00033	0.00035	-0.00019	0.00266	0.00117	0.00034	0.00028	0.00031	0.00025	0.00025	0.00027	0.00033	0.00036	0.00022	0.00028	0.00031
877.446	0.00031	0.00034	0.00035	0.00039	0.00035	0.00019	-2e-05	0.00034	0.00034	0.00036	0.00027	0.00035	0.00018	0.00041	-8e-05	-0.00058	0.00194	0.00057	0.00033	0.0003	0.00031	0.00024	0.00029	0.00027	0.00033	0.00035	0.00024	0.00029	0.00033
879.375	0.00031	0.00031	0.0003	0.00039	0.00036	0.00022	0.00013	0.00031	0.00032	0.00039	0.00033	0.0003	0.00016	0.00034	-0.00015	-0.00039	0.00154	0.00053	0.00032	0.0003	0.00029	0.00025	0.00033	0.00028	0.00032	0.00035	0.00027	0.00028	0.00034
881.303	0.00031	0.00028	0.00028	0.00038	0.00036	0.00031	0.00039	0.00029	0.00029	0.00038	0.00036	0.00026	0.00019	0.00025	0.0001	-1e-05	0.00145	0.00086	0.00031	0.00028	0.00029	0.00028	0.00034	0.00028	0.00031	0.00033	0.00028	0.00026	0.00032
883.232	0.00031	0.00027	0.00028	0.00036	0.00033	0.00041	0.00052	0.00026	0.00027	0.00034	0.00033	0.00027	0.00028	0.00018	0.00023	0.00019	0.00064	0.0008	0.00029	0.00028	0.00029	0.00029	0.00033	0.00028	0.0003	0.00031	0.00026	0.00026	0.0003
885.16	0.00031	0.00028	0.00029	0.00037	0.0003	0.00044	0.00048	0.00024	0.00025	0.00032	0.00029	0.00032	0.00035	0.00016	0.00028	0.00035	-0.00019	0.00028	0.00028	0.00029	0.0003	0.0003	0.00032	0.00026	0.0003	0.00031	0.00025	0.00027	0.0003
887.089	0.00031	0.00029	0.0003	0.00036	0.00028	0.00037	0.00044	0.00025	0.00025	0.00032	0.00028	0.00035	0.00035	0.00021	0.00032	0.00047	-0.0002	-2e-05	0.00027	0.00028	0.00029	0.00029	0.0003	0.00027	0.0003	0.00031	0.00026	0.00028	0.00031
889.017	0.00031	0.00028	0.0003	0.00034	0.00028	0.00031	0.00044	0.00027	0.00026	0.00031	0.0003	0.00033	0.00033	0.00029	0.00028	0.00046	1e-05	0.00012	0.00027	0.00027	0.00029	0.00028	0.00028	0.00028	0.00029	0.00031	0.00025	0.00028	0.0003
890.945	0.00031	0.00028	0.0003	0.00032	0.00029	0.00027	0.00038	0.00031	0.00026	0.00028	0.00032	0.00031	0.00032	0.00035	0.00026	0.00038	6e-05	0.00027	0.00028	0.00027	0.00027	0.00029	0.00028	0.00029	0.00028	0.00032	0.00024	0.00029	0.00026
892.874	0.0003	0.00028	0.00031	0.00032	0.00029	0.00026	0.00029	0.00033	0.00026	0.00027	0.00031	0.0003	0.0003	0.00037	0.00028	0.00036	0.00018	0.00017	0.00028	0.00027	0.00027	0.0003	0.00028	0.00029	0.00028	0.00032	0.00023	0.0003	0.00023
894.802	0.00029	0.00027	0.0003	0.00034	0.00027	0.00026	0.00026	0.00032	0.00026	0.00027	0.00028	0.00029	0.00029	0.00038	0.0003	0.00032	0.00028	0.00012	0.00028	0.00027	0.00027	0.0003	0.00028	0.00028	0.00028	0.00031	0.00024	0.0003	0.00023
896.731	0.00027	0.00027	0.0003	0.00033	0.00028	0.00027	0.00026	0.0003	0.00026	0.00027	0.00027	0.00027	0.00027	0.00039	0.00029	0.00022	0.00028	0.00028	0.00028	0.00027	0.00027	0.00029	0.00027	0.00027	0.00027	0.00028	0.00025	0.00029	0.00024
898.659	0.00026	0.00027	0.0003	0.00031	0.00032	0.00029	0.00027	0.00029	0.00025	0.00027	0.00027	0.00027	0.00027	0.00039	0.00026	0.00011	0.00024	0.00031	0.00028	0.00026	0.00027	0.00028	0.00026	0.00027	0.00026	0.00025	0.00025	0.00028	0.00024
900.588	0.00027	0.00027	0.00029	0.0003	0.00033	0.00029	0.00028	0.00028	0.00024	0.00028	0.00028	0.0003	0.00027	0.00036	0.00023	4e-05	0.00018	7e-05	0.00027	0.00025	0.00026	0.00026	0.00027	0.00026	0.00025	0.00024	0.00025	0.00026	0.00023
902.516	0.00027	0.00027	0.00028	0.00028	0.00031	0.00027	0.00028	0.00026	0.00023	0.00028	0.00027	0.00032	0.00027	0.0003	0.00022	6e-05	0.00014	-5e-05	0.00026	0.00025	0.00025	0.00025	0.00028	0.00025	0.00025	0.00025	0.00024	0.00024	0.00024
904.445	0.00026	0.00026	0.00027	0.00027	0.00029	0.00026	0.00028	0.00024	0.00024	0.00027	0.00026	0.00031	0.00027	0.00022	0.00023	0.00015	0.00016	1e-05	0.00025	0.00025	0.00025	0.00025	0.00028	0.00025	0.00026	0.00025	0.00025	0.00024	0.00024
906.373	0.00026	0.00026	0.00026	0.00025	0.00028	0.00027	0.00028	0.00024	0.00025	0.00026	0.00027	0.00029	0.00027	0.00017	0.00024	0.00023	0.00021	8e-05	0.00025	0.00025	0.00025	0.00025	0.00026	0.00025	0.00025	0.00025	0.00026	0.00023	0.00024
908.302	0.00025	0.00026	0.00026	0.00024	0.00027	0.00029	0.00027	0.00024	0.00024	0.00024	0.00027	0.00025	0.00027	0.00016	0.00024	0.00026	0.00025	0.00018	0.00025	0.00024	0.00025	0.00024	0.00025	0.00025	0.00024	0.00025	0.00027	0.00022	0.00024
910.23	0.00024	0.00026	0.00026	0.00024	0.00026	0.0003	0.00025	0.00025	0.00023	0.00024	0.00027	0.00022	0.00028	0.00017	0.00026	0.00026	0.00027	0.00024	0.00024	0.00023	0.00024	0.00023	0.00024	0.00024	0.00023	0.00024	0.00026	0.00022	0.00024
912.158	0.00023	0.00025	0.00025	0.00025	0.00025	0.0003	0.00021	0.00024	0.00022	0.00024	0.00027	0.00022	0.00028	0.00019	0.00027	0.00025	0.00027	0.00025	0.00022	0.00023	0.00024	0.00023	0.00023	0.00024	0.00022	0.00023	0.00024	0.00022	0.00024
914.087	0.00023	0.00024	0.00024	0.00025	0.00026	0.00027	0.0002	0.00024	0.00021	0.00024	0.00026	0.00024	0.00027	0.0002	0.00027	0.00026	0.00027	0.00024	0.00022	0.00023	0.00023	0.00023	0.00023	0.00024	0.00022	0.00023	0.00023	0.00022	0.00022
916.015	0.00023	0.00024	0.00025	0.00024	0.00027	0.00023	0.00023	0.00023	0.00021	0.00025	0.00024	0.00025	0.00026	0.00019	0.00023	0.00028	0.00026	0.00022	0.00022	0.00023	0.00022	0.00022	0.00023	0.00023	0.00022	0.00023	0.00022	0.00022	0.00022
917.944	0.00023	0.00023	0.00025	0.00024	0.00027	0.00021	0.00026	0.00023	0.00022	0.00025	0.00024	0.00024	0.00025	0.0002	0.00022	0.00029	0.00025	0.0002	0.00022	0.00022	0.00022	0.00022	0.00023	0.00022	0.00022	0.00023	0.00022	0.00022	0.00022
919.872	0.00023	0.00023	0.00024	0.00024	0.00026	0.00021	0.00026	0.00023	0.00023	0.00025	0.00024	0.00023	0.00025	0.00021	0.00023	0.00028	0.00024	0.00021	0.00023	0.00022	0.00022	0.00022	0.00023	0.00022	0.00022	0.00023	0.00022	0.00022	0.00022
921.801	0.00023	0.00023	0.00023	0.00023	0.00025	0.00022	0.00023	0.00022	0.00022	0.00024	0.00024	0.00023	0.00024	0.00021	0.00024	0.00026	0.00025	0.00021	0.00023	0.00022	0.00022	0.00022	0.00023	0.00022	0.00022	0.00022	0.00023	0.00022	0.00022
923.729	0.00023	0.00023	0.00023	0.00023	0.00024	0.00022	0.00022	0.00022	0.00022	0.00024	0.00023	0.00024	0.00024	0.00023	0.00023	0.00024	0.00025	0.00018	0.00024	0.00022	0.00022	0.00022	0.00023	0.00022	0.00022	0.00022	0.00023	0.00021	0.00021
925.658	0.00023	0.00023	0.00022	0.00022	0.00023	0.00023	0.00023	0.00022	0.00022	0.00023	0.00022	0.00024	0.00024	0.00025	0.00022	0.00022	0.00025	0.00017	0.00023	0.00022	0.00022	0.00022	0.00023	0.00022	0.00022	0.00022	0.00022	0.00021	0.00021
927.586	0.00023	0.00022	0.00022	0.00023	0.00023	0.00024	0.00024	0.00022	0.00021	0.00023	0.00022	0.00023	0.00024	0.00026	0.00022	0.00021	0.00023	0.00017	0.00023	0.00022	0.00022	0.00022	0.00023	0.00022	0.00022	0.00022	0.00022	0.00021	0.00022
929.515	0.00023	0.00022	0.00023	0.00023	0.00024	0.00024	0.00025	0.00022	0.00021	0.00023	0.00023	0.00022	0.00024	0.00025	0.00023	0.00021	0.00022	0.00018	0.00022	0.00022	0.00023	0.00022	0.00023	0.00022	0.00022	0.00023	0.00022	0.00022	0.00022
931.443	0.00023	0.00022	0.00024	0.00024	0.00025	0.00023	0.00025	0.00022	0.00021	0.00023	0.00023	0.00023	0.00023	0.00024	0.00023	0.00022	0.00021	0.00019	0.00023	0.00023	0.00023	0.00022	0.00023	0.00023	0.00023	0.00023	0.00022	0.00022	0.00022
933.371	0.00024	0.00023	0.00024	0.00025	0.00025	0.00023	0.00025	0.00022	0.00022	0.00023	0.00023	0.00024	0.00022	0.00024	0.00024	0.00024	0.00023	0.00021	0.00023	0.00023	0.00023	0.00022	0.00023	0.00023	0.00023	0.00023	0.00022	0.00022	0.00023
935.3	0.00024	0.00023	0.00024	0.00025	0.00025	0.00022	0.00025	0.00023	0.00022	0.00023	0.00023	0.00024	0.00022	0.00025	0.00025	0.00024	0.00024	0.00023	0.00023	0.00023	0.00022	0.00022	0.00023	0.00023	0.00023	0.00023	0.00022	0.00022	0.00023
937.228	0.00024	0.00024	0.00024	0.00025	0.00024	0.00022	0.00024	0.00023	0.00023	0.00024	0.00023	0.00025	0.00023	0.00025	0.00025	0.00024	0.00025	0.00024	0.00023	0.00023	0.00022	0.00023	0.00023	0.00024	0.00023	0.00023	0.00021	0.00022	0.00023
939.157	0.00025	0.00024	0.00025	0.00025	0.00024	0.00023	0.00023	0.00023	0.00022	0.00024	0.00023	0.00025	0.00024	0.00025	0.00025	0.00023	0.00026	0.00024	0.00023	0.00023	0.00022	0.00022	0.00023	0.00024	0.00023	0.00024	0.00022	0.00022	0.00023
941.085	0.00024	0.00024	0.00025	0.00025	0.00024	0.00024	0.00023	0.00023	0.00022	0.00025	0.00023	0.00025	0.00025	0.00025	0.00024	0.00024	0.00027	0.00023	0.00023	0.00023	0.00023	0.00022	0.00023	0.00024	0.00023	0.00024	0.00023	0.00022	0.00023
943.014	0.00024	0.00024	0.00025	0.00025	0.00025	0.00024	0.00023	0.00023	0.00022	0.00025	0.00024	0.00024	0.00025	0.00026	0.00024	0.00023	0.00026	0.00021	0.00023	0.00024	0.00023	0.00022	0.00023	0.00024	0.00023	0.00024	0.00023	0.00022	0.00023
944.942	0.00024	0.00024	0.00025	0.00025	0.00026	0.00024	0.00025	0.00023	0.00023	0.00025	0.00024	0.00024	0.00025	0.00026	0.00024	0.00023	0.00025	0.0002	0.00023	0.00024	0.00024	0.00023	0.00024	0.00024	0.00024	0.00024	0.00024	0.00023	0.00023
946.871	0.00024	0.00024	0.00025	0.00025	0.00026	0.00025	0.00026	0.00023	0.00023	0.00025	0.00025	0.00024	0.00025	0.00025	0.00025	0.00025	0.00024	0.00021	0.00023	0.00024	0.00024	0.00023	0.00024	0.00024	0.00024	0.00023	0.00024	0.00022	0.00024
948.799	0.00024	0.00025	0.00025	0.00026	0.00027	0.00025	0.00026	0.00024	0.00023	0.00025	0.00025	0.00025	0.00024	0.00025	0.00025	0.00026	0.00024	0.00022	0.00023	0.00024	0.00024	0.00023	0.00024	0.00024	0.00024	0.00023	0.00024	0.00022	0.00024
950.727	0.00025	0.00025	0.00025	0.00027	0.00027	0.00026	0.00027	0.00024	0.00024	0.00026	0.00025	0.00026	0.00025	0.00025	0.00025	0.00026	0.00024	0.00022	0.00024	0.00024	0.00024	0.00024	0.00024	0.00024	0.00024	0.00023	0.00024	0.00023	0.00023
952.656	0.00025	0.00026	0.00025	0.00027	0.00027	0.00027	0.00027	0.00024	0.00024	0.00026	0.00025	0.00026	0.00025	0.00025	0.00025	0.00026	0.00024	0.00023	0.00025	0.00024	0.00025	0.00024	0.00025	0.00024	0.00024	0.00023	0.00024	0.00023	0.00023
954.584	0.00025	0.00026	0.00026	0.00026	0.00027	0.00027	0.00027	0.00024	0.00024	0.00026	0.00025	0.00026	0.00026	0.00025	0.00026	0.00026	0.00024	0.00023	0.00025	0.00024	0.00025	0.00025	0.00026	0.00025	0.00024	0.00024	0.00024	0.00024	0.00024
956.513	0.00026	0.00025	0.00026	0.00027	0.00027	0.00027	0.00026	0.00024	0.00025	0.00026	0.00025	0.00026	0.00026	0.00026	0.00026	0.00026	0.00024	0.00024	0.00025	0.00025	0.00025	0.00025	0.00026	0.00025	0.00024	0.00024	0.00024	0.00024	0.00024
958.441	0.00026	0.00026	0.00027	0.00027	0.00027	0.00026	0.00026	0.00024	0.00025	0.00026	0.00025	0.00026	0.00026	0.00026	0.00026	0.00026	0.00024	0.00024	0.00025	0.00025	0.00024	0.00026	0.00026	0.00025	0.00024	0.00025	0.00024	0.00024	0.00024
960.37	0.00026	0.00026	0.00027	0.00027	0.00027	0.00026	0.00026	0.00025	0.00026	0.00027	0.00025	0.00026	0.00027	0.00026	0.00026	0.00026	0.00025	0.00024	0.00025	0.00026	0.00024	0.00026	0.00026	0.00026	0.00025	0.00025	0.00025	0.00024	0.00024
962.298	0.00027	0.00027	0.00027	0.00027	0.00028	0.00027	0.00026	0.00025	0.00026	0.00027	0.00026	0.00027	0.00027	0.00026	0.00027	0.00027	0.00025	0.00024	0.00025	0.00026	0.00025	0.00027	0.00026	0.00026	0.00025	0.00025	0.00025	0.00024	0.00024
964.227	0.00028	0.00027	0.00027	0.00027	0.00028	0.00027	0.00026	0.00026	0.00026	0.00028	0.00026	0.00028	0.00027	0.00027	0.00027	0.00028	0.00027	0.00023	0.00025	0.00026	0.00026	0.00027	0.00026	0.00026	0.00026	0.00025	0.00026	0.00025	0.00025
966.155	0.00028	0.00027	0.00028	0.00027	0.00028	0.00028	0.00028	0.00026	0.00026	0.00028	0.00026	0.00028	0.00027	0.00027	0.00028	0.00029	0.00028	0.00023	0.00026	0.00026	0.00026	0.00027	0.00027	0.00026	0.00026	0.00026	0.00026	0.00026	0.00025
968.084	0.00028	0.00028	0.00028	0.00028	0.00029	0.00028	0.00029	0.00027	0.00026	0.00028	0.00026	0.00028	0.00027	0.00028	0.00028	0.00028	0.00029	0.00024	0.00027	0.00026	0.00027	0.00027	0.00027	0.00027	0.00027	0.00026	0.00027	0.00025	0.00025
970.012	0.00028	0.00028	0.00029	0.00029	0.0003	0.00029	0.00029	0.00027	0.00027	0.00028	0.00027	0.00029	0.00028	0.00028	0.00028	0.00028	0.00029	0.00025	0.00028	0.00027	0.00027	0.00027	0.00027	0.00027	0.00027	0.00027	0.00027	0.00025	0.00025
971.94	0.00029	0.00028	0.0003	0.0003	0.00031	0.00029	0.00029	0.00027	0.00027	0.00029	0.00028	0.00029	0.00028	0.00029	0.00028	0.00028	0.00029	0.00026	0.00029	0.00027	0.00027	0.00028	0.00027	0.00028	0.00028	0.00027	0.00027	0.00026	0.00026
973.869	0.00029	0.00029	0.00031	0.0003	0.00031	0.0003	0.00029	0.00028	0.00027	0.0003	0.00028	0.00029	0.00029	0.00029	0.00029	0.00029	0.00029	0.00026	0.00029	0.00028	0.00028	0.00028	0.00027	0.00028	0.00028	0.00027	0.00027	0.00026	0.00027
975.797	0.00029	0.00029	0.00031	0.0003	0.00031	0.00031	0.00029	0.00028	0.00027	0.00029	0.00029	0.00029	0.00029	0.00029	0.0003	0.00029	0.00029	0.00026	0.00029	0.00028	0.00028	0.00028	0.00028	0.00028	0.00027	0.00027	0.00028	0.00027	0.00027
977.726	0.0003	0.00029	0.00031	0.0003	0.0003	0.00031	0.00029	0.00029	0.00027	0.00029	0.00029	0.0003	0.00029	0.0003	0.0003	0.00029	0.00029	0.00027	0.00029	0.00028	0.00028	0.00028	0.00028	0.00029	0.00027	0.00027	0.00028	0.00027	0.00027
979.654	0.0003	0.0003	0.00031	0.0003	0.0003	0.00031	0.0003	0.00029	0.00028	0.0003	0.0003	0.0003	0.0003	0.0003	0.0003	0.0003	0.00029	0.00027	0.00029	0.00029	0.00028	0.00029	0.00029	0.00029	0.00028	0.00028	0.00028	0.00028	0.00028
981.583	0.0003	0.0003	0.00031	0.00031	0.00031	0.00031	0.0003	0.00029	0.00028	0.00031	0.0003	0.0003	0.00031	0.0003	0.0003	0.00031	0.0003	0.00027	0.0003	0.00029	0.00029	0.00029	0.00029	0.00029	0.00028	0.00029	0.00028	0.00029	0.00028
983.511	0.00031	0.0003	0.00032	0.00031	0.00031	0.00032	0.0003	0.00029	0.00028	0.00031	0.00031	0.0003	0.00032	0.0003	0.0003	0.00031	0.0003	0.00027	0.0003	0.00029	0.0003	0.0003	0.00029	0.00029	0.00029	0.00029	0.00028	0.00029	0.00029
985.44	0.00031	0.0003	0.00033	0.00032	0.00031	0.00032	0.00032	0.0003	0.00029	0.00032	0.00031	0.0003	0.00033	0.0003	0.0003	0.00031	0.0003	0.00028	0.00031	0.00029	0.0003	0.0003	0.0003	0.00029	0.0003	0.0003	0.00029	0.00029	0.00029
987.368	0.00032	0.00031	0.00033	0.00033	0.00031	0.00033	0.00033	0.0003	0.00029	0.00032	0.00031	0.00031	0.00032	0.00031	0.00031	0.00031	0.00031	0.00028	0.00031	0.0003	0.00031	0.00031	0.0003	0.0003	0.0003	0.0003	0.0003	0.00029	0.00029
989.297	0.00033	0.00031	0.00033	0.00033	0.00032	0.00033	0.00033	0.00031	0.0003	0.00032	0.00032	0.00031	0.00032	0.00032	0.00032	0.00031	0.00032	0.00028	0.00031	0.00031	0.00031	0.00031	0.0003	0.0003	0.0003	0.0003	0.0003	0.00029	0.00029
991.225	0.00033	0.00032	0.00034	0.00034	0.00032	0.00032	0.00033	0.00031	0.0003	0.00032	0.00032	0.00032	0.00032	0.00032	0.00032	0.00032	0.00032	0.00029	0.00031	0.00031	0.00031	0.00031	0.0003	0.0003	0.0003	0.0003	0.00031	0.0003	0.00029
993.153	0.00033	0.00033	0.00034	0.00035	0.00033	0.00032	0.00033	0.00031	0.0003	0.00033	0.00032	0.00033	0.00032	0.00032	0.00033	0.00032	0.00032	0.0003	0.00032	0.00032	0.00031	0.00031	0.00031	0.00031	0.00031	0.0003	0.00031	0.0003	0.0003
995.082	0.00033	0.00034	0.00034	0.00035	0.00033	0.00033	0.00033	0.00032	0.0003	0.00033	0.00033	0.00033	0.00032	0.00032	0.00033	0.00032	0.00032	0.0003	0.00032	0.00032	0.00031	0.00031	0.00032	0.00031	0.00031	0.0003	0.00031	0.0003	0.0003
997.01	0.00033	0.00034	0.00034	0.00036	0.00033	0.00033	0.00034	0.00032	0.00031	0.00033	0.00033	0.00034	0.00032	0.00032	0.00033	0.00032	0.00033	0.0003	0.00032	0.00032	0.00032	0.00031	0.00032	0.00032	0.00032	0.00031	0.00031	0.0003	0.00031
998.939	0.00034	0.00034	0.00035	0.00035	0.00033	0.00033	0.00034	0.00032	0.00031	0.00033	0.00034	0.00034	0.00033	0.00033	0.00033	0.00032	0.00033	0.00031	0.00032	0.00033	0.00032	0.00031	0.00033	0.00033	0.00032	0.00031	0.00031	0.0003	0.00031
1000.87	0.00034	0.00035	0.00035	0.00035	0.00034	0.00034	0.00033	0.00032	0.00032	0.00034	0.00035	0.00034	0.00034	0.00033	0.00033	0.00033	0.00033	0.00032	0.00033	0.00033	0.00032	0.00031	0.00033	0.00033	0.00032	0.00032	0.00032	0.00031	0.0003
1002.8	0.00035	0.00035	0.00035	0.00035	0.00035	0.00035	0.00033	0.00033	0.00033	0.00034	0.00034	0.00034	0.00034	0.00034	0.00034	0.00033	0.00034	0.00032	0.00033	0.00033	0.00032	0.00032	0.00032	0.00033	0.00032	0.00032	0.00032	0.00031	0.0003
1004.72	0.00035	0.00035	0.00035	0.00035	0.00036	0.00035	0.00034	0.00033	0.00033	0.00034	0.00035	0.00034	0.00034	0.00034	0.00034	0.00034	0.00034	0.00032	0.00034	0.00032	0.00032	0.00032	0.00033	0.00034	0.00033	0.00032	0.00032	0.00031	0.0003
1006.65	0.00035	0.00035	0.00035	0.00035	0.00036	0.00035	0.00035	0.00033	0.00032	0.00034	0.00035	0.00034	0.00035	0.00033	0.00034	0.00034	0.00034	0.00032	0.00034	0.00032	0.00032	0.00032	0.00033	0.00034	0.00033	0.00032	0.00032	0.00031	0.00031
1008.58	0.00035	0.00034	0.00036	0.00035	0.00035	0.00034	0.00035	0.00032	0.00032	0.00033	0.00035	0.00034	0.00035	0.00033	0.00033	0.00035	0.00034	0.00033	0.00033	0.00032	0.00033	0.00032	0.00033	0.00034	0.00033	0.00032	0.00032	0.00031	0.00031
1010.51	0.00034	0.00034	0.00036	0.00035	0.00035	0.00034	0.00034	0.00032	0.00033	0.00033	0.00034	0.00034	0.00035	0.00033	0.00033	0.00035	0.00034	0.00033	0.00033	0.00033	0.00033	0.00032	0.00033	0.00033	0.00033	0.00032	0.00032	0.00032	0.00031
1012.44	0.00034	0.00034	0.00036	0.00035	0.00035	0.00035	0.00034	0.00032	0.00033	0.00033	0.00034	0.00034	0.00034	0.00034	0.00034	0.00035	0.00034	0.00032	0.00033	0.00033	0.00032	0.00032	0.00033	0.00033	0.00032	0.00032	0.00032	0.00032	0.00031
1014.37	0.00034	0.00034	0.00035	0.00036	0.00035	0.00035	0.00034	0.00033	0.00032	0.00033	0.00034	0.00033	0.00034	0.00033	0.00035	0.00035	0.00034	0.00031	0.00033	0.00032	0.00032	0.00032	0.00033	0.00032	0.00032	0.00032	0.00032	0.00032	0.0003
1016.29	0.00034	0.00034	0.00035	0.00035	0.00035	0.00036	0.00034	0.00033	0.00032	0.00033	0.00035	0.00033	0.00033	0.00033	0.00035	0.00034	0.00034	0.00031	0.00033	0.00032	0.00031	0.00032	0.00032	0.00032	0.00032	0.00032	0.00032	0.00032	0.0003
1018.22	0.00034	0.00034	0.00035	0.00035	0.00035	0.00036	0.00034	0.00033	0.00032	0.00033	0.00034	0.00033	0.00033	0.00033	0.00034	0.00033	0.00034	0.00029	0.00033	0.00032	0.00031	0.00032	0.00032	0.00032	0.00032	0.00032	0.00032	0.00031	0.00031
1020.15	0.00034	0.00034	0.00036	0.00035	0.00035	0.00036	0.00035	0.00032	0.00032	0.00033	0.00034	0.00034	0.00033	0.00032	0.00034	0.00033	0.00035	0.00028	0.00032	0.00031	0.00032	0.00032	0.00032	0.00033	0.00033	0.00032	0.00032	0.00031	0.00031
1022.08	0.00033	0.00034	0.00036	0.00035	0.00034	0.00035	0.00035	0.00032	0.00032	0.00034	0.00033	0.00034	0.00034	0.00033	0.00035	0.00034	0.00035	0.00029	0.00033	0.00031	0.00032	0.00032	0.00033	0.00033	0.00033	0.00032	0.00032	0.00031	0.0003
1024.01	0.00034	0.00035	0.00036	0.00035	0.00034	0.00035	0.00035	0.00033	0.00032	0.00034	0.00033	0.00034	0.00035	0.00034	0.00035	0.00034	0.00035	0.00031	0.00033	0.00031	0.00032	0.00032	0.00033	0.00034	0.00032	0.00032	0.00032	0.00031	0.0003
1025.94	0.00035	0.00034	0.00036	0.00036	0.00035	0.00035	0.00035	0.00034	0.00032	0.00034	0.00034	0.00034	0.00035	0.00035	0.00035	0.00035	0.00034	0.00032	0.00034	0.00032	0.00032	0.00032	0.00032	0.00033	0.00033	0.00032	0.00032	0.00031	0.0003
1027.87	0.00036	0.00033	0.00036	0.00037	0.00035	0.00035	0.00035	0.00034	0.00032	0.00034	0.00035	0.00035	0.00034	0.00035	0.00034	0.00034	0.00034	0.00032	0.00034	0.00032	0.00032	0.00032	0.00033	0.00033	0.00033	0.00032	0.00032	0.00031	0.0003
1029.79	0.00036	0.00034	0.00036	0.00037	0.00035	0.00035	0.00036	0.00034	0.00032	0.00034	0.00035	0.00035	0.00033	0.00035	0.00033	0.00034	0.00034	0.00032	0.00033	0.00032	0.00032	0.00032	0.00034	0.00032	0.00033	0.00032	0.00032	0.00031	0.00031
1031.72	0.00035	0.00034	0.00036	0.00036	0.00036	0.00036	0.00036	0.00034	0.00033	0.00034	0.00035	0.00034	0.00034	0.00035	0.00034	0.00034	0.00034	0.00032	0.00033	0.00032	0.00032	0.00033	0.00035	0.00032	0.00033	0.00033	0.00031	0.00032	0.00031
1033.65	0.00035	0.00034	0.00036	0.00036	0.00035	0.00036	0.00035	0.00034	0.00033	0.00034	0.00035	0.00034	0.00034	0.00035	0.00035	0.00035	0.00034	0.00031	0.00034	0.00032	0.00032	0.00033	0.00034	0.00032	0.00033	0.00033	0.00031	0.00032	0.00032
1035.58	0.00035	0.00035	0.00035	0.00036	0.00035	0.00036	0.00035	0.00034	0.00033	0.00034	0.00035	0.00034	0.00035	0.00035	0.00035	0.00035	0.00034	0.00031	0.00035	0.00032	0.00032	0.00033	0.00034	0.00033	0.00033	0.00033	0.00032	0.00032	0.00032
1037.51	0.00035	0.00035	0.00035	0.00035	0.00035	0.00035	0.00036	0.00034	0.00033	0.00035	0.00034	0.00034	0.00035	0.00035	0.00035	0.00035	0.00034	0.0003	0.00035	0.00033	0.00032	0.00033	0.00034	0.00034	0.00033	0.00033	0.00033	0.00032	0.00032
1039.44	0.00035	0.00036	0.00036	0.00035	0.00036	0.00034	0.00036	0.00033	0.00033	0.00036	0.00034	0.00034	0.00034	0.00036	0.00036	0.00035	0.00035	0.00031	0.00035	0.00034	0.00032	0.00034	0.00035	0.00034	0.00033	0.00032	0.00033	0.00032	0.00032
1041.36	0.00036	0.00036	0.00036	0.00035	0.00037	0.00034	0.00037	0.00034	0.00034	0.00036	0.00034	0.00034	0.00034	0.00037	0.00036	0.00035	0.00035	0.00032	0.00035	0.00035	0.00032	0.00034	0.00035	0.00034	0.00034	0.00033	0.00033	0.00031	0.00032
1043.29	0.00036	0.00036	0.00036	0.00035	0.00038	0.00035	0.00037	0.00035	0.00034	0.00037	0.00035	0.00035	0.00034	0.00037	0.00036	0.00036	0.00036	0.00033	0.00035	0.00036	0.00033	0.00035	0.00036	0.00033	0.00034	0.00034	0.00034	0.00032	0.00032
1045.22	0.00037	0.00037	0.00036	0.00036	0.00038	0.00037	0.00037	0.00036	0.00035	0.00037	0.00035	0.00036	0.00034	0.00037	0.00036	0.00036	0.00036	0.00034	0.00035	0.00036	0.00033	0.00034	0.00035	0.00034	0.00035	0.00035	0.00034	0.00033	0.00033
1047.15	0.00037	0.00038	0.00037	0.00036	0.00038	0.00038	0.00037	0.00036	0.00035	0.00037	0.00035	0.00036	0.00035	0.00037	0.00035	0.00036	0.00035	0.00034	0.00036	0.00036	0.00032	0.00035	0.00035	0.00035	0.00035	0.00035	0.00034	0.00033	0.00033
1049.08	0.00039	0.00038	0.00037	0.00037	0.00038	0.00038	0.00037	0.00036	0.00034	0.00037	0.00036	0.00036	0.00035	0.00037	0.00036	0.00036	0.00035	0.00034	0.00037	0.00035	0.00033	0.00035	0.00034	0.00035	0.00035	0.00034	0.00034	0.00033	0.00034
1051.01	0.00039	0.00038	0.00038	0.00038	0.00038	0.00038	0.00037	0.00036	0.00034	0.00037	0.00036	0.00036	0.00036	0.00037	0.00037	0.00036	0.00036	0.00034	0.00038	0.00035	0.00035	0.00035	0.00034	0.00035	0.00035	0.00034	0.00034	0.00033	0.00034
1052.94	0.00039	0.00038	0.00039	0.00038	0.00039	0.00038	0.00037	0.00037	0.00035	0.00038	0.00037	0.00037	0.00036	0.00037	0.00037	0.00037	0.00036	0.00034	0.0004	0.00034	0.00035	0.00035	0.00034	0.00035	0.00035	0.00034	0.00034	0.00033	0.00034
1054.86	0.00038	0.00039	0.00039	0.00039	0.00039	0.00039	0.00037	0.00037	0.00036	0.00038	0.00037	0.00037	0.00037	0.00038	0.00038	0.00036	0.00037	0.00034	0.00038	0.00034	0.00034	0.00035	0.00033	0.00036	0.00035	0.00035	0.00035	0.00035	0.00034
1056.79	0.00038	0.00039	0.00039	0.0004	0.0004	0.00039	0.00038	0.00037	0.00036	0.00039	0.00037	0.00037	0.00037	0.00038	0.00038	0.00036	0.00037	0.00035	0.00035	0.00034	0.00034	0.00036	0.00034	0.00038	0.00035	0.00036	0.00036	0.00035	0.00034
1058.72	0.00038	0.00038	0.0004	0.0004	0.0004	0.00039	0.00039	0.00037	0.00037	0.00039	0.00038	0.00038	0.00038	0.00039	0.00039	0.00037	0.00038	0.00035	0.00037	0.00034	0.00035	0.00037	0.00035	0.00038	0.00035	0.00036	0.00036	0.00036	0.00034
1060.65	0.00038	0.00038	0.00041	0.00041	0.0004	0.00039	0.0004	0.00037	0.00037	0.0004	0.00039	0.00038	0.00039	0.00039	0.00039	0.00037	0.00038	0.00035	0.00039	0.00034	0.00036	0.00038	0.00037	0.00037	0.00035	0.00036	0.00036	0.00036	0.00033
1062.58	0.00038	0.00038	0.00042	0.00041	0.0004	0.00039	0.00039	0.00038	0.00037	0.0004	0.00038	0.00038	0.00039	0.00038	0.00039	0.00038	0.00038	0.00035	0.00038	0.00034	0.00037	0.00037	0.00039	0.00036	0.00035	0.00036	0.00037	0.00036	0.00034
1064.51	0.00038	0.0004	0.00042	0.00041	0.0004	0.00039	0.00039	0.00039	0.00037	0.00039	0.00037	0.00039	0.00039	0.00038	0.00039	0.00039	0.00038	0.00035	0.00038	0.00035	0.00037	0.00037	0.00041	0.00035	0.00036	0.00036	0.00037	0.00035	0.00034
1066.43	0.0004	0.00041	0.00041	0.00041	0.00041	0.0004	0.0004	0.00039	0.00037	0.00039	0.00038	0.0004	0.00039	0.00039	0.0004	0.00039	0.00038	0.00036	0.0004	0.00035	0.00037	0.00037	0.00044	0.00036	0.00037	0.00037	0.00037	0.00035	0.00035
1068.36	0.00041	0.00042	0.00042	0.00042	0.00042	0.00041	0.00041	0.00039	0.00038	0.0004	0.00039	0.0004	0.00039	0.0004	0.0004	0.00039	0.00039	0.00036	0.0004	0.00036	0.00037	0.00037	0.00044	0.00037	0.00038	0.00037	0.00038	0.00035	0.00036
1070.29	0.00042	0.00043	0.00043	0.00042	0.00043	0.00043	0.00041	0.0004	0.00039	0.00041	0.00041	0.00041	0.0004	0.0004	0.0004	0.00039	0.00039	0.00036	0.00037	0.00037	0.00038	0.00038	0.00041	0.00039	0.00038	0.00038	0.00038	0.00036	0.00037
1072.22	0.00044	0.00043	0.00044	0.00042	0.00044	0.00043	0.00042	0.00041	0.0004	0.00041	0.00042	0.00041	0.0004	0.0004	0.00041	0.0004	0.0004	0.00037	0.00035	0.00039	0.00039	0.00038	0.00039	0.0004	0.0004	0.00038	0.00038	0.00037	0.00037
1074.15	0.00045	0.00042	0.00044	0.00042	0.00044	0.00044	0.00043	0.00041	0.00041	0.00042	0.00043	0.00042	0.00041	0.0004	0.00042	0.00041	0.0004	0.00038	0.00036	0.00039	0.0004	0.00038	0.00037	0.00041	0.00041	0.00039	0.00038	0.00037	0.00037
1076.08	0.00045	0.00042	0.00045	0.00044	0.00044	0.00044	0.00044	0.00042	0.00041	0.00042	0.00044	0.00042	0.00041	0.00041	0.00042	0.00041	0.0004	0.00039	0.00038	0.00038	0.0004	0.00039	0.00036	0.00041	0.00042	0.0004	0.00039	0.00038	0.00038
1078.01	0.00046	0.00043	0.00045	0.00045	0.00045	0.00045	0.00044	0.00043	0.00041	0.00043	0.00045	0.00042	0.00042	0.00043	0.00043	0.00042	0.00041	0.00039	0.00041	0.00039	0.0004	0.0004	0.00037	0.00042	0.00041	0.0004	0.0004	0.00039	0.00039
1079.93	0.00048	0.00044	0.00045	0.00047	0.00046	0.00045	0.00044	0.00044	0.00042	0.00043	0.00046	0.00043	0.00043	0.00043	0.00044	0.00043	0.00042	0.00039	0.00042	0.00041	0.0004	0.0004	0.00037	0.00043	0.00041	0.00041	0.0004	0.0004	0.00039
1081.86	0.00049	0.00045	0.00046	0.00048	0.00047	0.00045	0.00045	0.00045	0.00044	0.00044	0.00046	0.00044	0.00044	0.00044	0.00045	0.00044	0.00043	0.0004	0.00043	0.00042	0.00041	0.00042	0.00039	0.00043	0.00042	0.00041	0.00041	0.00041	0.0004
1083.79	0.00046	0.00046	0.00048	0.00048	0.00048	0.00046	0.00046	0.00046	0.00045	0.00044	0.00046	0.00046	0.00045	0.00044	0.00045	0.00045	0.00045	0.00041	0.00043	0.00044	0.00042	0.00043	0.00041	0.00043	0.00043	0.00042	0.00042	0.00042	0.00041
1085.72	0.00043	0.00047	0.00049	0.00048	0.00049	0.00047	0.00047	0.00046	0.00044	0.00045	0.00046	0.00048	0.00046	0.00046	0.00046	0.00045	0.00046	0.00043	0.00044	0.00047	0.00043	0.00044	0.00043	0.00044	0.00043	0.00042	0.00042	0.00043	0.00042
1087.65	0.00043	0.00048	0.00049	0.00049	0.0005	0.00048	0.00049	0.00046	0.00044	0.00046	0.00046	0.00049	0.00048	0.00047	0.00047	0.00047	0.00047	0.00044	0.00045	0.0005	0.00043	0.00043	0.00044	0.00048	0.00044	0.00043	0.00042	0.00044	0.00042
1089.58	0.00045	0.00051	0.0005	0.00051	0.0005	0.0005	0.00049	0.00046	0.00044	0.00047	0.00047	0.00049	0.00049	0.00048	0.00049	0.00048	0.00047	0.00045	0.00046	0.00052	0.00043	0.00043	0.00045	0.0005	0.00045	0.00044	0.00043	0.00045	0.00042
1091.5	0.00045	0.00052	0.00052	0.00053	0.00051	0.00051	0.00049	0.00046	0.00046	0.00048	0.00049	0.00049	0.0005	0.00049	0.0005	0.00049	0.00048	0.00046	0.00047	0.00052	0.00043	0.00044	0.00045	0.00048	0.00046	0.00045	0.00045	0.00045	0.00042
1093.43	0.00044	0.00052	0.00054	0.00054	0.00051	0.00053	0.00049	0.00047	0.00047	0.00048	0.0005	0.00049	0.00051	0.00049	0.0005	0.0005	0.00049	0.00046	0.00048	0.00049	0.00044	0.00045	0.00046	0.00046	0.00047	0.00047	0.00046	0.00045	0.00043
1095.36	0.00047	0.00052	0.00053	0.00054	0.0005	0.00054	0.00052	0.00049	0.00046	0.00048	0.0005	0.00049	0.00051	0.00049	0.00051	0.0005	0.00049	0.00046	0.00048	0.00048	0.00047	0.00046	0.00047	0.00048	0.00047	0.00047	0.00047	0.00045	0.00044
1097.29	0.00051	0.00053	0.00053	0.00054	0.0005	0.00053	0.00053	0.00051	0.00047	0.00048	0.0005	0.00048	0.00051	0.0005	0.00051	0.0005	0.00048	0.00046	0.00048	0.00049	0.0005	0.00047	0.00048	0.0005	0.00047	0.00046	0.00047	0.00045	0.00044
1099.22	0.00054	0.00054	0.00054	0.00055	0.00052	0.00053	0.00054	0.00052	0.00049	0.0005	0.0005	0.00049	0.00051	0.00051	0.00051	0.0005	0.00049	0.00047	0.00048	0.00048	0.0005	0.00048	0.00048	0.00051	0.00048	0.00045	0.00048	0.00046	0.00043
1101.15	0.00055	0.00056	0.00055	0.00055	0.00053	0.00053	0.00054	0.00053	0.00052	0.00052	0.0005	0.00051	0.00051	0.00053	0.00051	0.00051	0.0005	0.00048	0.00049	0.00047	0.0005	0.00049	0.00049	0.00051	0.00049	0.00046	0.00048	0.00048	0.00044
1103.08	0.00055	0.00056	0.00055	0.00056	0.00054	0.00054	0.00054	0.00054	0.00054	0.00055	0.00052	0.00052	0.00051	0.00053	0.00052	0.00052	0.00051	0.00049	0.0005	0.0005	0.00052	0.0005	0.0005	0.00051	0.00049	0.00047	0.00048	0.00049	0.00046
1105	0.00057	0.00055	0.00055	0.00057	0.00055	0.00056	0.00055	0.00054	0.00055	0.00057	0.00054	0.00053	0.00051	0.00054	0.00053	0.00053	0.00052	0.0005	0.00051	0.00052	0.00055	0.00051	0.0005	0.00051	0.00051	0.00049	0.00049	0.00049	0.00047
1106.93	0.00058	0.00055	0.00057	0.00058	0.00056	0.00057	0.00056	0.00055	0.00055	0.00056	0.00055	0.00055	0.00052	0.00056	0.00054	0.00054	0.00053	0.00051	0.00051	0.00052	0.00058	0.00052	0.00051	0.0005	0.00052	0.0005	0.00051	0.0005	0.00048
1108.86	0.0006	0.00057	0.0006	0.0006	0.00058	0.00058	0.00058	0.00056	0.00055	0.00054	0.00056	0.00057	0.00054	0.00058	0.00057	0.00056	0.00053	0.00052	0.00053	0.00051	0.00059	0.00053	0.00051	0.00049	0.00054	0.0005	0.00051	0.0005	0.00049
1110.79	0.00061	0.00059	0.00062	0.00061	0.0006	0.00059	0.00059	0.00057	0.00056	0.00054	0.00056	0.00058	0.00055	0.00058	0.00058	0.00058	0.00055	0.00053	0.00055	0.00051	0.00057	0.00056	0.00053	0.00051	0.00055	0.00051	0.00052	0.0005	0.0005
1112.72	0.00062	0.00061	0.00062	0.00061	0.00062	0.00059	0.0006	0.00058	0.00057	0.00055	0.00057	0.00058	0.00056	0.00057	0.00058	0.00058	0.00057	0.00054	0.00057	0.00053	0.00055	0.00057	0.00054	0.00054	0.00056	0.00052	0.00052	0.0005	0.0005
1114.65	0.00061	0.00062	0.00063	0.00062	0.00063	0.00059	0.00061	0.00059	0.00059	0.00055	0.00058	0.00059	0.00057	0.00058	0.00057	0.00057	0.00058	0.00054	0.00057	0.00054	0.00053	0.00057	0.00056	0.00056	0.00059	0.00052	0.00053	0.00051	0.0005
1116.57	0.00062	0.00061	0.00065	0.00063	0.00064	0.0006	0.00064	0.0006	0.00058	0.00054	0.0006	0.0006	0.00058	0.0006	0.00058	0.00058	0.00058	0.00054	0.00057	0.00055	0.00055	0.00056	0.00057	0.00056	0.00061	0.00052	0.00054	0.00052	0.0005
1118.5	0.00064	0.00058	0.00065	0.00064	0.00063	0.00062	0.00065	0.00061	0.00058	0.00055	0.00061	0.00061	0.00059	0.00061	0.00059	0.0006	0.0006	0.00056	0.00056	0.00056	0.00056	0.00056	0.00057	0.00056	0.0006	0.00052	0.00055	0.00053	0.0005
1120.43	0.00065	0.00058	0.00066	0.00065	0.00064	0.00064	0.00066	0.00062	0.00058	0.00056	0.00062	0.00062	0.00061	0.00063	0.00062	0.00062	0.00062	0.00058	0.00057	0.00058	0.00057	0.00057	0.00057	0.00058	0.00056	0.00054	0.00055	0.00054	0.00052
1122.36	0.00067	0.0006	0.00067	0.00067	0.00067	0.00066	0.00067	0.00064	0.0006	0.0006	0.00063	0.00063	0.00063	0.00064	0.00064	0.00063	0.00062	0.0006	0.00058	0.00058	0.00058	0.0006	0.00058	0.0006	0.00054	0.00057	0.00055	0.00055	0.00054
1124.29	0.00069	0.00061	0.00066	0.00069	0.00069	0.00068	0.00069	0.00067	0.00063	0.00064	0.00064	0.00064	0.00065	0.00066	0.00065	0.00064	0.00063	0.00061	0.00061	0.00059	0.0006	0.00063	0.0006	0.00062	0.00058	0.00059	0.00057	0.00056	0.00056
1126.22	0.00071	0.00064	0.00062	0.00071	0.00071	0.0007	0.0007	0.00069	0.00066	0.00067	0.00066	0.00065	0.00066	0.00067	0.00067	0.00065	0.00065	0.00063	0.00064	0.00061	0.00062	0.00065	0.00062	0.00063	0.00063	0.00061	0.0006	0.00059	0.00057
1128.15	0.00074	0.00069	0.00059	0.00074	0.00072	0.00072	0.00071	0.0007	0.00068	0.00068	0.00069	0.00068	0.00068	0.00068	0.0007	0.00066	0.00067	0.00065	0.00066	0.00063	0.00064	0.00065	0.00064	0.00064	0.00066	0.00063	0.00062	0.0006	0.00058
1130.07	0.00078	0.00073	0.00063	0.00075	0.00073	0.00073	0.00071	0.00071	0.00069	0.00069	0.00071	0.0007	0.0007	0.00069	0.00073	0.00068	0.00069	0.00067	0.00067	0.00064	0.00066	0.00065	0.00066	0.00064	0.00068	0.00064	0.00064	0.00061	0.00059
1132	0.0008	0.00075	0.00074	0.00076	0.00075	0.00074	0.00073	0.00072	0.0007	0.00071	0.00073	0.00071	0.00072	0.00071	0.00074	0.00069	0.00071	0.00068	0.00068	0.00065	0.00066	0.00067	0.00067	0.00065	0.00068	0.00065	0.00066	0.00063	0.0006
1133.93	0.0008	0.00075	0.00083	0.00077	0.00076	0.00076	0.00075	0.00073	0.00072	0.00074	0.00075	0.00073	0.00073	0.00072	0.00075	0.00071	0.00072	0.00069	0.0007	0.00067	0.00068	0.0007	0.00069	0.00066	0.0007	0.00064	0.00067	0.00064	0.00061
1135.86	0.00081	0.00077	0.00084	0.0008	0.00078	0.00077	0.00077	0.00075	0.00073	0.00076	0.00074	0.00074	0.00075	0.00074	0.00075	0.00072	0.00073	0.00069	0.00071	0.00069	0.0007	0.00072	0.0007	0.00067	0.00072	0.00066	0.00067	0.00065	0.00062
1137.79	0.00081	0.0008	0.00083	0.00082	0.0008	0.00078	0.00079	0.00076	0.00075	0.00077	0.00072	0.00076	0.00076	0.00075	0.00075	0.00074	0.00074	0.0007	0.00072	0.00071	0.00072	0.00074	0.00072	0.00069	0.00072	0.00068	0.00068	0.00067	0.00063
1139.72	0.00083	0.00083	0.00084	0.00081	0.00082	0.00079	0.00082	0.00077	0.00077	0.00077	0.00071	0.00078	0.00077	0.00077	0.00075	0.00076	0.00074	0.00071	0.00072	0.00072	0.00073	0.00074	0.00073	0.00071	0.00071	0.00071	0.0007	0.00068	0.00066
1141.64	0.00084	0.00084	0.00087	0.0008	0.00085	0.00082	0.00085	0.00078	0.00078	0.00077	0.00075	0.0008	0.00079	0.0008	0.00077	0.00077	0.00076	0.00074	0.00073	0.00073	0.00074	0.00072	0.00074	0.00074	0.0007	0.00072	0.00071	0.00069	0.00068
1143.57	0.00084	0.00085	0.00089	0.00081	0.00087	0.00084	0.00087	0.0008	0.00079	0.00079	0.00081	0.00081	0.00081	0.00082	0.00079	0.00079	0.00078	0.00075	0.00074	0.00074	0.00076	0.0007	0.00075	0.00076	0.00072	0.00075	0.00072	0.0007	0.00069
1145.5	0.00085	0.00087	0.0009	0.00085	0.00089	0.00086	0.00087	0.00083	0.0008	0.00082	0.00083	0.00081	0.00082	0.00083	0.0008	0.0008	0.00079	0.00077	0.00075	0.00076	0.00078	0.00074	0.00076	0.00076	0.00074	0.00078	0.00073	0.00072	0.0007
1147.43	0.00087	0.00088	0.0009	0.0009	0.0009	0.00087	0.00087	0.00085	0.00081	0.00084	0.0008	0.00082	0.00083	0.00084	0.00081	0.00082	0.00081	0.00078	0.00077	0.00077	0.00078	0.00079	0.00078	0.00077	0.00077	0.00079	0.00074	0.00073	0.00071
1149.36	0.0009	0.00089	0.00091	0.00094	0.0009	0.00088	0.00088	0.00085	0.00082	0.00085	0.0008	0.00083	0.00084	0.00085	0.00083	0.00083	0.00082	0.00079	0.00079	0.00078	0.00079	0.00082	0.00079	0.00078	0.00079	0.00079	0.00074	0.00073	0.00071
1151.29	0.00092	0.00089	0.00091	0.00096	0.0009	0.0009	0.0009	0.00086	0.00083	0.00086	0.00083	0.00084	0.00086	0.00086	0.00086	0.00083	0.00083	0.00081	0.00081	0.00079	0.00079	0.00082	0.00081	0.00079	0.00079	0.00079	0.00075	0.00074	0.00071
1153.22	0.00093	0.0009	0.00092	0.00095	0.0009	0.00092	0.00091	0.00087	0.00085	0.00088	0.00085	0.00087	0.00088	0.00088	0.00087	0.00085	0.00084	0.00082	0.00083	0.0008	0.00081	0.00079	0.00081	0.0008	0.0008	0.00079	0.00078	0.00075	0.00073
1155.14	0.00094	0.00091	0.00093	0.00095	0.00092	0.00094	0.00091	0.00088	0.00087	0.0009	0.00086	0.0009	0.00089	0.00089	0.00089	0.00087	0.00086	0.00083	0.00084	0.00081	0.00083	0.00078	0.00082	0.00082	0.00081	0.00079	0.00081	0.00075	0.00075
1157.07	0.00094	0.00093	0.00094	0.00096	0.00094	0.00094	0.00092	0.00089	0.00088	0.00091	0.00087	0.00092	0.0009	0.0009	0.00091	0.00089	0.00087	0.00084	0.00085	0.00082	0.00084	0.00082	0.00083	0.00084	0.00082	0.0008	0.00081	0.00077	0.00076
1159	0.00095	0.00095	0.00097	0.00096	0.00096	0.00094	0.00094	0.0009	0.00089	0.00092	0.0009	0.00093	0.00091	0.00091	0.00092	0.00089	0.00088	0.00085	0.00086	0.00084	0.00085	0.00085	0.00084	0.00084	0.00083	0.00082	0.0008	0.00079	0.00076
1160.93	0.00096	0.00097	0.00099	0.00095	0.00098	0.00094	0.00095	0.00091	0.00091	0.00093	0.00091	0.00092	0.00091	0.00091	0.00093	0.00088	0.00089	0.00085	0.00087	0.00085	0.00085	0.00085	0.00085	0.00084	0.00085	0.00083	0.00081	0.00081	0.00077
1162.86	0.00096	0.00099	0.001	0.00095	0.00099	0.00096	0.00096	0.00093	0.00092	0.00092	0.00093	0.0009	0.00091	0.00092	0.00094	0.00089	0.0009	0.00085	0.00088	0.00085	0.00086	0.00084	0.00086	0.00084	0.00087	0.00084	0.00081	0.00081	0.00078
1164.79	0.00097	0.001	0.001	0.00096	0.00099	0.00098	0.00097	0.00094	0.00093	0.00093	0.00094	0.00092	0.00092	0.00094	0.00095	0.00091	0.00091	0.00087	0.00089	0.00086	0.00088	0.00084	0.00087	0.00085	0.00087	0.00087	0.00082	0.00081	0.00079
1166.71	0.00098	0.001	0.001	0.001	0.00101	0.00099	0.00098	0.00095	0.00094	0.00095	0.00095	0.00099	0.00094	0.00095	0.00095	0.00093	0.00092	0.00089	0.00091	0.00087	0.0009	0.00087	0.00088	0.00086	0.00087	0.0009	0.00084	0.00082	0.0008
1168.64	0.001	0.00101	0.00102	0.00103	0.00108	0.001	0.001	0.00096	0.00095	0.00096	0.00096	0.00105	0.00096	0.00096	0.00095	0.00095	0.00093	0.0009	0.00091	0.00088	0.00091	0.0009	0.00089	0.00087	0.00089	0.00092	0.00088	0.00083	0.00081
1170.57	0.00101	0.00102	0.00103	0.00104	0.00115	0.00101	0.00101	0.00098	0.00096	0.00097	0.00096	0.00106	0.00097	0.00097	0.00096	0.00097	0.00094	0.0009	0.00091	0.00089	0.0009	0.00092	0.00091	0.00089	0.00091	0.00092	0.0009	0.00085	0.00081
1172.5	0.00102	0.00102	0.00104	0.00104	0.00116	0.00103	0.00101	0.00098	0.00097	0.00098	0.00097	0.00105	0.00098	0.00097	0.00098	0.00098	0.00095	0.00091	0.00092	0.0009	0.00089	0.00093	0.00092	0.0009	0.00092	0.00092	0.0009	0.00086	0.00082
1174.43	0.00104	0.00102	0.00105	0.00105	0.00112	0.00104	0.00102	0.00099	0.00098	0.001	0.00098	0.00106	0.00098	0.00099	0.001	0.00098	0.00096	0.00092	0.00095	0.00092	0.0009	0.00094	0.00092	0.00092	0.00091	0.00092	0.00092	0.00086	0.00082
1176.36	0.00106	0.00103	0.00106	0.00106	0.00107	0.00106	0.00103	0.00099	0.001	0.00102	0.001	0.00107	0.00097	0.001	0.00101	0.00098	0.00096	0.00093	0.00097	0.00092	0.00091	0.00095	0.00092	0.00093	0.00091	0.00092	0.00095	0.00086	0.00082
1178.29	0.00108	0.00104	0.00108	0.00108	0.00103	0.00108	0.00103	0.001	0.001	0.00102	0.00101	0.00106	0.00096	0.001	0.00101	0.00098	0.00098	0.00094	0.00097	0.00093	0.00092	0.00096	0.00093	0.00095	0.00092	0.00093	0.00096	0.00086	0.00083
1180.21	0.00109	0.00106	0.0011	0.0011	0.00102	0.00109	0.00104	0.00101	0.00101	0.00103	0.00101	0.00104	0.00098	0.001	0.00102	0.00099	0.00099	0.00094	0.00097	0.00094	0.00093	0.00096	0.00094	0.00096	0.00094	0.00095	0.00095	0.00086	0.00085
1182.14	0.0011	0.00108	0.00112	0.00112	0.00107	0.00109	0.00105	0.00102	0.00102	0.00103	0.00103	0.00103	0.00105	0.00101	0.00103	0.00101	0.001	0.00096	0.00098	0.00096	0.00094	0.00097	0.00096	0.00096	0.00095	0.00094	0.00095	0.00087	0.00086
1184.07	0.00112	0.00109	0.00114	0.00115	0.00115	0.00108	0.00107	0.00104	0.00103	0.00105	0.00104	0.00104	0.00113	0.00102	0.00103	0.00104	0.001	0.00097	0.00101	0.00097	0.00097	0.00099	0.00098	0.00096	0.00099	0.00093	0.00095	0.00088	0.00088
1186	0.00112	0.0011	0.00115	0.00116	0.00119	0.00112	0.00107	0.00105	0.00105	0.00107	0.00105	0.00104	0.00115	0.00105	0.00103	0.0011	0.00096	0.00099	0.00103	0.00099	0.00099	0.00099	0.00099	0.00098	0.00106	0.00094	0.00096	0.00089	0.00091
1187.93	0.00113	0.00111	0.00116	0.00115	0.00117	0.00125	0.00103	0.00107	0.00107	0.00108	0.00104	0.00105	0.00109	0.0011	0.00103	0.00111	0.0009	0.00101	0.00103	0.00101	0.001	0.00099	0.00099	0.00101	0.0011	0.00095	0.00099	0.00095	0.00095
1189.86	0.00115	0.00113	0.00117	0.00116	0.00115	0.00129	0.00101	0.00108	0.00108	0.00109	0.00103	0.00108	0.00103	0.00113	0.00104	0.00111	0.00089	0.00102	0.00103	0.00102	0.00101	0.00101	0.00099	0.00103	0.0011	0.00096	0.001	0.00102	0.00098
1191.78	0.00117	0.00115	0.00117	0.00118	0.00114	0.00114	0.00105	0.00109	0.00108	0.0011	0.00105	0.00109	0.00105	0.00109	0.00106	0.00114	0.00096	0.00103	0.00104	0.00102	0.00101	0.00103	0.00101	0.00104	0.00111	0.00095	0.00098	0.00101	0.00095
1193.71	0.00118	0.00117	0.00117	0.0012	0.00114	0.00106	0.0011	0.0011	0.00109	0.00112	0.00107	0.0011	0.00112	0.00107	0.00108	0.00113	0.00105	0.00104	0.00104	0.00103	0.00102	0.00103	0.00104	0.00102	0.00107	0.00095	0.00096	0.00095	0.00092
1195.64	0.00119	0.0012	0.00119	0.0012	0.00114	0.00114	0.00113	0.0011	0.0011	0.00112	0.0011	0.0011	0.00116	0.00106	0.00111	0.00109	0.00108	0.00105	0.00104	0.00104	0.00103	0.00103	0.00105	0.00101	0.00101	0.00097	0.00097	0.00093	0.00092
1197.57	0.00119	0.0012	0.00121	0.0012	0.00118	0.0012	0.00114	0.00111	0.0011	0.00112	0.00112	0.00111	0.00117	0.00102	0.00112	0.00109	0.00109	0.00106	0.00105	0.00103	0.00103	0.00103	0.00104	0.00102	0.00102	0.00102	0.00098	0.00094	0.00092
1199.5	0.0012	0.00118	0.00123	0.0012	0.00123	0.00121	0.00116	0.00113	0.0011	0.00113	0.00112	0.00111	0.00117	0.00095	0.00114	0.0011	0.00109	0.00106	0.00106	0.00103	0.00103	0.00103	0.00104	0.00105	0.00103	0.00105	0.00101	0.00093	0.00093
1201.43	0.0012	0.00118	0.00124	0.00121	0.00126	0.00124	0.00119	0.00115	0.00112	0.00116	0.00112	0.0011	0.00117	0.00096	0.00117	0.00111	0.0011	0.00107	0.00107	0.00103	0.00103	0.00104	0.00105	0.00106	0.00102	0.00106	0.00107	0.00096	0.00093
1203.35	0.00121	0.00121	0.00126	0.00124	0.00125	0.00122	0.00124	0.00115	0.00113	0.00118	0.00112	0.00111	0.00118	0.00105	0.00119	0.00113	0.00111	0.00108	0.00107	0.00105	0.00104	0.00106	0.00107	0.00107	0.00103	0.00106	0.0011	0.00111	0.00092
1205.28	0.00122	0.00125	0.00127	0.00127	0.00125	0.00117	0.00126	0.00113	0.00115	0.00117	0.00113	0.00114	0.00116	0.00109	0.00119	0.00115	0.00112	0.00109	0.00109	0.00104	0.00107	0.00108	0.00107	0.00109	0.00107	0.00105	0.00109	0.00125	0.00089
1207.21	0.00122	0.00127	0.00127	0.00127	0.00127	0.00115	0.00123	0.00111	0.00116	0.00117	0.00114	0.00114	0.00113	0.0011	0.00118	0.00116	0.00113	0.0011	0.00111	0.00104	0.00111	0.00109	0.00107	0.00109	0.0011	0.00103	0.00107	0.00127	0.0009
1209.14	0.00121	0.00126	0.00127	0.00126	0.00128	0.00115	0.00121	0.00114	0.00117	0.0012	0.00115	0.00115	0.00113	0.00118	0.00117	0.00116	0.00114	0.00111	0.00114	0.00105	0.00112	0.00109	0.00108	0.0011	0.00112	0.00103	0.00108	0.00122	0.00094
1211.07	0.00122	0.00124	0.00127	0.00128	0.00128	0.00116	0.00122	0.00118	0.00117	0.00122	0.00115	0.00119	0.00117	0.00126	0.00117	0.00117	0.00115	0.00111	0.00116	0.00107	0.00112	0.00107	0.00109	0.00111	0.00113	0.00105	0.00109	0.00115	0.00098
1213	0.00123	0.00124	0.00128	0.0013	0.0013	0.00118	0.00119	0.0012	0.00119	0.00122	0.00116	0.00121	0.00121	0.00124	0.00117	0.00118	0.00116	0.00112	0.00114	0.00108	0.00112	0.00107	0.0011	0.00112	0.00113	0.00107	0.0011	0.00108	0.00094
1214.93	0.00124	0.00125	0.00128	0.00131	0.0013	0.00119	0.00115	0.00126	0.00122	0.00121	0.00118	0.00119	0.00122	0.00119	0.00118	0.00122	0.00117	0.00113	0.00113	0.00109	0.00114	0.00109	0.00113	0.00112	0.00113	0.0011	0.0011	0.00104	0.00088
1216.85	0.00126	0.00126	0.0013	0.00132	0.0013	0.00121	0.00115	0.00133	0.00125	0.00122	0.00121	0.00119	0.0012	0.0012	0.00121	0.00124	0.00119	0.00114	0.00113	0.00111	0.00115	0.0011	0.00114	0.00113	0.00113	0.00111	0.00111	0.00107	0.0009
1218.78	0.00128	0.00126	0.00132	0.00132	0.00128	0.00126	0.00123	0.00136	0.00126	0.00123	0.00122	0.0012	0.00122	0.00123	0.00126	0.00124	0.0012	0.00115	0.00116	0.00113	0.00116	0.00112	0.00115	0.00115	0.00111	0.00114	0.00109	0.00113	0.00098
1220.71	0.0013	0.00127	0.00133	0.00132	0.00127	0.00131	0.00134	0.0013	0.00125	0.00124	0.00123	0.00123	0.00125	0.00125	0.00129	0.00124	0.00121	0.00115	0.00118	0.00114	0.00116	0.00114	0.00116	0.00115	0.00111	0.00115	0.00108	0.00114	0.00101
1222.64	0.00132	0.00129	0.00134	0.00132	0.0013	0.00135	0.00138	0.00119	0.00127	0.00125	0.00124	0.00125	0.00125	0.00124	0.00132	0.00124	0.00122	0.00116	0.00119	0.00115	0.00116	0.00115	0.00116	0.00117	0.00114	0.00115	0.0011	0.00112	0.00098
1224.57	0.00133	0.00132	0.00136	0.00134	0.00135	0.00135	0.00137	0.00117	0.00128	0.00126	0.00125	0.00126	0.00124	0.00124	0.00136	0.00125	0.00123	0.00117	0.00119	0.00117	0.00116	0.00116	0.00117	0.00118	0.00117	0.00115	0.00113	0.00111	0.001
1226.5	0.00133	0.00134	0.00137	0.00135	0.00135	0.00133	0.00136	0.0013	0.00128	0.00127	0.00127	0.00126	0.00126	0.00126	0.00136	0.00124	0.00123	0.00118	0.0012	0.00117	0.00117	0.00117	0.00118	0.00119	0.00118	0.00115	0.00115	0.00111	0.00106
1228.42	0.00134	0.00135	0.00138	0.00136	0.00135	0.00132	0.00136	0.00142	0.00126	0.00127	0.00128	0.00127	0.00127	0.00128	0.00132	0.00123	0.00124	0.00119	0.0012	0.00118	0.00118	0.00117	0.00119	0.00119	0.00118	0.00115	0.00116	0.00111	0.00109
1230.35	0.00135	0.00135	0.00139	0.00136	0.00135	0.00132	0.00135	0.00141	0.00124	0.00127	0.00127	0.00127	0.00127	0.00129	0.00128	0.00123	0.00124	0.0012	0.0012	0.00118	0.00118	0.00117	0.00119	0.00119	0.00118	0.00115	0.00115	0.00111	0.00109
1232.28	0.00136	0.00135	0.00138	0.00136	0.00135	0.00132	0.00134	0.00132	0.00124	0.00127	0.00127	0.00126	0.00127	0.00128	0.00127	0.00123	0.00124	0.0012	0.00121	0.00118	0.00118	0.00118	0.00119	0.00118	0.00118	0.00116	0.00114	0.00111	0.00108
1234.21	0.00135	0.00135	0.00138	0.00135	0.00135	0.00132	0.00133	0.00126	0.00126	0.00127	0.00126	0.00126	0.00127	0.00127	0.00127	0.00124	0.00124	0.00121	0.00121	0.00118	0.00119	0.00118	0.00119	0.00118	0.00118	0.00116	0.00114	0.0011	0.00107
1236.14	0.00135	0.00134	0.00138	0.00135	0.00135	0.00133	0.00132	0.00127	0.00128	0.00128	0.00126	0.00126	0.00127	0.00127	0.00128	0.00124	0.00125	0.00121	0.00121	0.00118	0.00119	0.00118	0.00119	0.00117	0.00118	0.00116	0.00114	0.0011	0.00107
1238.07	0.00135	0.00134	0.00137	0.00135	0.00135	0.00133	0.00131	0.00128	0.00129	0.00128	0.00126	0.00126	0.00126	0.00126	0.00128	0.00122	0.00125	0.0012	0.0012	0.00118	0.00118	0.00117	0.00119	0.00117	0.00118	0.00115	0.00114	0.0011	0.00107
1240	0.00134	0.00133	0.00136	0.00135	0.00134	0.00132	0.0013	0.00126	0.00127	0.00127	0.00126	0.00125	0.00126	0.00126	0.00127	0.0012	0.00123	0.00119	0.0012	0.00118	0.00117	0.00117	0.00118	0.00117	0.00117	0.00115	0.00114	0.0011	0.00106
1241.92	0.00133	0.00132	0.00135	0.00133	0.00132	0.00131	0.00129	0.00125	0.00125	0.00126	0.00125	0.00124	0.00125	0.00125	0.00125	0.0012	0.00122	0.00118	0.00119	0.00116	0.00116	0.00116	0.00118	0.00117	0.00116	0.00114	0.00113	0.00109	0.00106
1243.85	0.00132	0.00131	0.00134	0.00132	0.00131	0.00129	0.00128	0.00124	0.00124	0.00125	0.00124	0.00124	0.00123	0.00123	0.00124	0.00122	0.00121	0.00117	0.00117	0.00115	0.00115	0.00115	0.00117	0.00115	0.00115	0.00113	0.00112	0.00108	0.00105
1245.78	0.0013	0.0013	0.00132	0.00131	0.0013	0.00128	0.00127	0.00123	0.00122	0.00124	0.00123	0.00123	0.00122	0.00122	0.00122	0.00122	0.0012	0.00117	0.00116	0.00114	0.00114	0.00114	0.00116	0.00114	0.00114	0.00112	0.0011	0.00107	0.00104
1247.71	0.00129	0.00128	0.00131	0.00131	0.00128	0.00127	0.00126	0.00123	0.00121	0.00123	0.00122	0.00122	0.00121	0.00122	0.00121	0.00121	0.0012	0.00116	0.00115	0.00113	0.00113	0.00113	0.00114	0.00113	0.00113	0.00111	0.00108	0.00106	0.00103
1249.64	0.00128	0.00127	0.00131	0.00131	0.00127	0.00127	0.00125	0.00123	0.0012	0.00122	0.00121	0.00121	0.0012	0.00121	0.0012	0.00119	0.00121	0.00115	0.00114	0.00113	0.00112	0.00112	0.00114	0.00113	0.00112	0.00111	0.00108	0.00106	0.00103
1251.57	0.00128	0.00126	0.0013	0.0013	0.00126	0.00126	0.00125	0.00122	0.00117	0.00121	0.0012	0.0012	0.00119	0.0012	0.00119	0.00118	0.00121	0.00115	0.00114	0.00112	0.00112	0.00111	0.00113	0.00112	0.00112	0.0011	0.00108	0.00106	0.00102
1253.49	0.00127	0.00125	0.00129	0.00128	0.00126	0.00126	0.00125	0.00121	0.00114	0.0012	0.00119	0.0012	0.00119	0.00118	0.00118	0.00117	0.00119	0.00114	0.00114	0.00112	0.00111	0.00111	0.00112	0.00111	0.00111	0.0011	0.00108	0.00105	0.00102
1255.42	0.00126	0.00124	0.00128	0.00126	0.00125	0.00124	0.00123	0.0012	0.00113	0.00119	0.00119	0.00119	0.00118	0.00117	0.00116	0.00114	0.00114	0.00113	0.00113	0.00111	0.0011	0.00111	0.00111	0.0011	0.00111	0.00109	0.00107	0.00104	0.00102
1257.35	0.00124	0.00123	0.00126	0.00124	0.00124	0.00123	0.00121	0.00119	0.00112	0.00118	0.00118	0.00117	0.00117	0.00116	0.00116	0.00112	0.00109	0.00112	0.00112	0.0011	0.0011	0.0011	0.0011	0.00109	0.00109	0.00108	0.00106	0.00103	0.00101
1259.28	0.00123	0.00122	0.00124	0.00123	0.00122	0.00121	0.00118	0.00118	0.0011	0.00117	0.00116	0.00116	0.00115	0.00115	0.00115	0.00112	0.00105	0.0011	0.0011	0.00109	0.00108	0.00108	0.00109	0.00107	0.00107	0.00106	0.00105	0.00102	0.00099
1261.21	0.00121	0.0012	0.00123	0.00121	0.00121	0.0012	0.00117	0.00117	0.00109	0.00116	0.00114	0.00114	0.00113	0.00114	0.00114	0.00112	0.00104	0.00109	0.00109	0.00107	0.00106	0.00107	0.00107	0.00106	0.00106	0.00104	0.00105	0.001	0.00097
1263.14	0.0012	0.00119	0.00122	0.0012	0.00119	0.00119	0.00116	0.00115	0.00108	0.00116	0.00112	0.00113	0.00112	0.00113	0.00113	0.00113	0.00106	0.00109	0.00109	0.00106	0.00105	0.00105	0.00105	0.00105	0.00105	0.00103	0.00104	0.00099	0.00096
1265.07	0.00119	0.00118	0.00122	0.0012	0.00119	0.00118	0.00117	0.00113	0.0011	0.00114	0.00111	0.00112	0.00113	0.00112	0.00111	0.00111	0.0011	0.0011	0.00108	0.00105	0.00105	0.00104	0.00105	0.00105	0.00104	0.00102	0.00102	0.00099	0.00096
1266.99	0.00119	0.00118	0.00121	0.0012	0.0012	0.00117	0.00117	0.00113	0.00114	0.00113	0.00111	0.00112	0.00113	0.00111	0.00112	0.00109	0.00114	0.00109	0.00108	0.00105	0.00105	0.00104	0.00105	0.00106	0.00105	0.00103	0.00101	0.00099	0.00096
1268.92	0.0012	0.00119	0.00121	0.0012	0.0012	0.00118	0.00117	0.00115	0.00117	0.00114	0.00112	0.00114	0.00114	0.00111	0.00113	0.00111	0.00115	0.00106	0.00108	0.00106	0.00106	0.00105	0.00106	0.00107	0.00105	0.00103	0.00101	0.00101	0.00096
1270.85	0.00121	0.0012	0.00122	0.00121	0.00121	0.00119	0.00118	0.00117	0.00117	0.00115	0.00114	0.00114	0.00114	0.00112	0.00115	0.00115	0.00114	0.00106	0.00109	0.00107	0.00107	0.00106	0.00108	0.00108	0.00106	0.00104	0.00103	0.00103	0.00097
1272.78	0.00123	0.00122	0.00124	0.00124	0.00123	0.00122	0.00119	0.00118	0.00117	0.00117	0.00116	0.00115	0.00115	0.00114	0.00117	0.00119	0.00113	0.0011	0.0011	0.00108	0.00109	0.00108	0.0011	0.00109	0.00107	0.00105	0.00104	0.00104	0.001
1274.71	0.00125	0.00124	0.00127	0.00126	0.00126	0.00123	0.00121	0.0012	0.00118	0.00119	0.00118	0.00117	0.00118	0.00116	0.00119	0.0012	0.00115	0.00115	0.00112	0.0011	0.0011	0.00109	0.00111	0.0011	0.00108	0.00107	0.00105	0.00105	0.00102
1276.64	0.00126	0.00125	0.00128	0.00128	0.00127	0.00124	0.00121	0.00121	0.0012	0.00121	0.00118	0.00119	0.0012	0.00118	0.0012	0.00121	0.00119	0.00119	0.00114	0.00113	0.00112	0.00111	0.00112	0.00111	0.0011	0.00109	0.00106	0.00106	0.00103
1278.56	0.00127	0.00126	0.00129	0.00128	0.00127	0.00125	0.00122	0.00123	0.0012	0.00122	0.00119	0.00121	0.00122	0.0012	0.00121	0.00122	0.00122	0.0012	0.00116	0.00114	0.00113	0.00113	0.00114	0.00113	0.00112	0.0011	0.00108	0.00106	0.00104
1280.49	0.00128	0.00126	0.0013	0.00129	0.00128	0.00126	0.00123	0.00125	0.0012	0.00123	0.00121	0.00123	0.00123	0.00122	0.00122	0.0012	0.00123	0.00121	0.00118	0.00115	0.00114	0.00114	0.00115	0.00115	0.00114	0.00112	0.0011	0.00107	0.00105
1282.42	0.00129	0.00127	0.0013	0.0013	0.00129	0.00128	0.00124	0.00126	0.00122	0.00124	0.00122	0.00124	0.00124	0.00124	0.00123	0.00119	0.00124	0.00123	0.00119	0.00116	0.00116	0.00116	0.00115	0.00115	0.00115	0.00113	0.00112	0.00108	0.00107
1284.35	0.0013	0.00128	0.00131	0.00131	0.00129	0.00128	0.00124	0.00126	0.00123	0.00124	0.00123	0.00124	0.00123	0.00124	0.00124	0.0012	0.00123	0.00127	0.00119	0.00117	0.00117	0.00117	0.00116	0.00116	0.00116	0.00114	0.00113	0.0011	0.00108
1286.28	0.00131	0.0013	0.00133	0.00131	0.00129	0.00127	0.00127	0.00125	0.00124	0.00124	0.00124	0.00124	0.00123	0.00125	0.00126	0.00122	0.00122	0.00128	0.00119	0.00117	0.00118	0.00116	0.00117	0.00117	0.00117	0.00115	0.00114	0.00111	0.00108
1288.21	0.00132	0.00131	0.00134	0.00132	0.00131	0.00127	0.0013	0.00124	0.00124	0.00126	0.00125	0.00124	0.00125	0.00125	0.00127	0.00124	0.00123	0.00126	0.0012	0.00118	0.00118	0.00116	0.00118	0.00118	0.00117	0.00116	0.00115	0.00113	0.00108
1290.14	0.00133	0.00132	0.00135	0.00133	0.00132	0.00129	0.00131	0.00125	0.00125	0.00127	0.00127	0.00125	0.00127	0.00125	0.00128	0.00124	0.00124	0.00128	0.0012	0.00119	0.00119	0.00116	0.00119	0.00119	0.00118	0.00117	0.00116	0.00113	0.00109
1292.06	0.00135	0.00133	0.00136	0.00135	0.00134	0.00131	0.00131	0.00127	0.00126	0.00128	0.00128	0.00127	0.00128	0.00125	0.0013	0.00125	0.00126	0.00137	0.00122	0.0012	0.00119	0.00118	0.0012	0.0012	0.00119	0.00118	0.00116	0.00114	0.00111
1293.99	0.00136	0.00134	0.00138	0.00136	0.00136	0.00134	0.00133	0.00128	0.00127	0.00129	0.00128	0.00129	0.00129	0.00126	0.00131	0.00126	0.00128	0.00145	0.00124	0.00121	0.0012	0.0012	0.00122	0.00121	0.0012	0.00119	0.00117	0.00115	0.00112
1295.92	0.00137	0.00136	0.00139	0.00137	0.00137	0.00136	0.00135	0.00129	0.00127	0.00131	0.0013	0.0013	0.00131	0.00129	0.00131	0.00127	0.0013	0.00137	0.00126	0.00123	0.00121	0.00121	0.00123	0.00122	0.00121	0.0012	0.00118	0.00117	0.00114
1297.85	0.00138	0.00137	0.0014	0.00139	0.00139	0.00137	0.00136	0.00131	0.00129	0.00133	0.00131	0.00131	0.00132	0.00131	0.00132	0.00129	0.00129	0.00118	0.00127	0.00124	0.00123	0.00122	0.00125	0.00124	0.00122	0.00122	0.0012	0.00118	0.00115
1299.78	0.00139	0.00139	0.00142	0.00141	0.00141	0.00138	0.00138	0.00133	0.00131	0.00134	0.00132	0.00132	0.00133	0.00133	0.00133	0.00131	0.00128	0.00103	0.00127	0.00125	0.00124	0.00124	0.00125	0.00125	0.00123	0.00123	0.00121	0.00119	0.00116
1301.71	0.00141	0.0014	0.00143	0.00143	0.00142	0.0014	0.00139	0.00135	0.00133	0.00135	0.00133	0.00133	0.00133	0.00134	0.00135	0.00132	0.00129	0.00102	0.00128	0.00126	0.00126	0.00125	0.00127	0.00126	0.00125	0.00124	0.00122	0.0012	0.00116
1303.63	0.00142	0.00141	0.00145	0.00144	0.00144	0.00141	0.0014	0.00137	0.00134	0.00137	0.00134	0.00135	0.00135	0.00136	0.00136	0.00133	0.00132	0.00108	0.00129	0.00127	0.00127	0.00127	0.00128	0.00127	0.00127	0.00125	0.00124	0.00122	0.00117
1305.56	0.00144	0.00143	0.00147	0.00145	0.00145	0.00143	0.00142	0.00138	0.00135	0.00138	0.00136	0.00136	0.00136	0.00137	0.00138	0.00134	0.00133	0.00118	0.0013	0.00129	0.00128	0.00129	0.0013	0.00128	0.00128	0.00126	0.00125	0.00123	0.00118
1307.49	0.00146	0.00145	0.00148	0.00147	0.00147	0.00144	0.00143	0.00139	0.00137	0.0014	0.00138	0.00137	0.00138	0.00138	0.0014	0.00136	0.00135	0.00126	0.00132	0.0013	0.00129	0.0013	0.00131	0.0013	0.0013	0.00127	0.00127	0.00123	0.0012
1309.42	0.00147	0.00146	0.00149	0.00148	0.00148	0.00146	0.00144	0.0014	0.00139	0.00141	0.00139	0.00138	0.00139	0.0014	0.00141	0.00138	0.00137	0.00132	0.00134	0.00132	0.00131	0.00131	0.00133	0.00131	0.00132	0.00129	0.00128	0.00124	0.00122
1311.35	0.00149	0.00147	0.0015	0.00149	0.00149	0.00147	0.00145	0.00141	0.0014	0.00143	0.00141	0.0014	0.0014	0.00141	0.00142	0.0014	0.00139	0.00134	0.00135	0.00134	0.00133	0.00133	0.00134	0.00133	0.00133	0.0013	0.00129	0.00126	0.00123
1313.28	0.00151	0.00148	0.00152	0.00151	0.0015	0.00148	0.00147	0.00143	0.00141	0.00144	0.00142	0.00141	0.00142	0.00142	0.00143	0.00141	0.0014	0.00136	0.00136	0.00135	0.00135	0.00134	0.00135	0.00134	0.00134	0.00132	0.0013	0.00128	0.00124
1315.21	0.00152	0.0015	0.00154	0.00152	0.00151	0.00148	0.00148	0.00144	0.00142	0.00145	0.00144	0.00143	0.00144	0.00143	0.00144	0.00142	0.00141	0.00137	0.00137	0.00136	0.00135	0.00135	0.00137	0.00135	0.00135	0.00133	0.00132	0.00129	0.00124
1317.13	0.00152	0.00151	0.00155	0.00153	0.00153	0.0015	0.00149	0.00145	0.00143	0.00146	0.00144	0.00145	0.00145	0.00144	0.00144	0.00144	0.00143	0.00139	0.00139	0.00137	0.00136	0.00136	0.00138	0.00136	0.00136	0.00134	0.00133	0.0013	0.00125
1319.06	0.00153	0.00152	0.00156	0.00154	0.00154	0.00151	0.0015	0.00146	0.00144	0.00147	0.00145	0.00145	0.00146	0.00146	0.00146	0.00145	0.00143	0.00141	0.0014	0.00137	0.00137	0.00138	0.00138	0.00137	0.00137	0.00134	0.00134	0.00131	0.00127
1320.99	0.00154	0.00153	0.00157	0.00155	0.00154	0.00152	0.00151	0.00147	0.00145	0.00148	0.00146	0.00146	0.00146	0.00147	0.00147	0.00146	0.00144	0.00142	0.00141	0.00138	0.00138	0.00139	0.00139	0.00138	0.00138	0.00136	0.00135	0.00131	0.00128
1322.92	0.00155	0.00154	0.00158	0.00156	0.00155	0.00153	0.00152	0.00148	0.00146	0.00149	0.00147	0.00146	0.00147	0.00148	0.00148	0.00147	0.00145	0.00142	0.00142	0.00138	0.00139	0.00139	0.0014	0.00139	0.00139	0.00137	0.00136	0.00132	0.00129
1324.85	0.00156	0.00155	0.00159	0.00157	0.00156	0.00154	0.00152	0.00148	0.00146	0.0015	0.00148	0.00148	0.00148	0.00149	0.00148	0.00147	0.00146	0.00141	0.00142	0.00139	0.0014	0.00139	0.00141	0.0014	0.0014	0.00137	0.00136	0.00133	0.00129
1326.78	0.00157	0.00155	0.0016	0.00158	0.00157	0.00155	0.00153	0.00149	0.00147	0.0015	0.00149	0.00149	0.00149	0.00149	0.00149	0.00147	0.00147	0.00141	0.00143	0.0014	0.0014	0.0014	0.00141	0.00141	0.0014	0.00138	0.00137	0.00134	0.0013
1328.7	0.00158	0.00156	0.0016	0.00159	0.00157	0.00156	0.00153	0.00149	0.00147	0.0015	0.00149	0.00149	0.0015	0.0015	0.00149	0.00148	0.00148	0.00142	0.00143	0.00141	0.00141	0.0014	0.00142	0.00141	0.00141	0.00139	0.00138	0.00135	0.00131
1330.63	0.00158	0.00156	0.0016	0.00159	0.00158	0.00156	0.00154	0.0015	0.00148	0.0015	0.0015	0.0015	0.0015	0.0015	0.0015	0.00149	0.00148	0.00144	0.00144	0.00142	0.00141	0.00141	0.00142	0.00142	0.00141	0.00139	0.00138	0.00135	0.00131
1332.56	0.00158	0.00157	0.00161	0.0016	0.00158	0.00157	0.00155	0.0015	0.00149	0.00151	0.0015	0.0015	0.0015	0.00151	0.00151	0.00149	0.00148	0.00145	0.00144	0.00142	0.00142	0.00141	0.00143	0.00143	0.00141	0.0014	0.00139	0.00135	0.00131
1334.49	0.00159	0.00157	0.00161	0.0016	0.00159	0.00157	0.00156	0.00151	0.0015	0.00151	0.00151	0.00151	0.00151	0.00152	0.00151	0.0015	0.00149	0.00145	0.00145	0.00142	0.00143	0.00142	0.00144	0.00143	0.00142	0.00141	0.00139	0.00135	0.00132
1336.42	0.00159	0.00158	0.00162	0.00161	0.00159	0.00158	0.00156	0.00151	0.0015	0.00152	0.00151	0.00151	0.00152	0.00152	0.00152	0.0015	0.00149	0.00145	0.00146	0.00143	0.00143	0.00142	0.00144	0.00143	0.00142	0.00141	0.00139	0.00135	0.00132
1338.35	0.0016	0.00159	0.00163	0.00162	0.0016	0.00158	0.00157	0.00152	0.00151	0.00153	0.00152	0.00152	0.00152	0.00152	0.00152	0.00151	0.0015	0.00146	0.00147	0.00144	0.00144	0.00143	0.00145	0.00143	0.00143	0.00141	0.0014	0.00136	0.00133
1340.28	0.0016	0.00159	0.00163	0.00162	0.00161	0.00159	0.00157	0.00153	0.00151	0.00154	0.00152	0.00153	0.00153	0.00153	0.00153	0.00152	0.0015	0.00146	0.00147	0.00145	0.00144	0.00144	0.00145	0.00144	0.00143	0.00142	0.0014	0.00137	0.00133
1342.2	0.00161	0.0016	0.00164	0.00163	0.00161	0.00159	0.00158	0.00153	0.00152	0.00155	0.00153	0.00153	0.00154	0.00154	0.00154	0.00152	0.00151	0.00147	0.00148	0.00145	0.00145	0.00145	0.00146	0.00145	0.00144	0.00142	0.00141	0.00137	0.00133
1344.13	0.00162	0.00161	0.00165	0.00164	0.00162	0.0016	0.00158	0.00154	0.00152	0.00155	0.00153	0.00154	0.00154	0.00154	0.00154	0.00153	0.00151	0.00147	0.00148	0.00146	0.00145	0.00145	0.00146	0.00146	0.00145	0.00143	0.00141	0.00138	0.00134
1346.06	0.00162	0.00162	0.00165	0.00164	0.00162	0.00161	0.00159	0.00154	0.00153	0.00156	0.00154	0.00154	0.00154	0.00154	0.00154	0.00154	0.00152	0.00148	0.00148	0.00146	0.00146	0.00146	0.00147	0.00146	0.00145	0.00144	0.00142	0.00139	0.00135
1347.99	0.00163	0.00162	0.00166	0.00165	0.00163	0.00161	0.0016	0.00155	0.00153	0.00157	0.00154	0.00154	0.00154	0.00154	0.00155	0.00154	0.00152	0.00148	0.00149	0.00147	0.00146	0.00146	0.00147	0.00146	0.00146	0.00144	0.00142	0.00139	0.00135
1349.92	0.00163	0.00162	0.00166	0.00165	0.00163	0.00161	0.0016	0.00155	0.00154	0.00156	0.00155	0.00155	0.00154	0.00155	0.00155	0.00153	0.00152	0.00148	0.00149	0.00146	0.00146	0.00146	0.00147	0.00146	0.00146	0.00144	0.00142	0.00139	0.00135
1351.85	0.00163	0.00162	0.00166	0.00165	0.00163	0.00161	0.0016	0.00155	0.00154	0.00156	0.00155	0.00155	0.00155	0.00155	0.00156	0.00154	0.00153	0.00148	0.0015	0.00146	0.00147	0.00146	0.00147	0.00146	0.00146	0.00144	0.00142	0.00139	0.00136
1353.77	0.00163	0.00162	0.00166	0.00165	0.00163	0.00161	0.0016	0.00156	0.00154	0.00156	0.00155	0.00155	0.00155	0.00155	0.00156	0.00154	0.00153	0.00148	0.00149	0.00146	0.00147	0.00146	0.00147	0.00146	0.00146	0.00144	0.00142	0.0014	0.00136
1355.7	0.00163	0.00162	0.00167	0.00165	0.00163	0.00161	0.0016	0.00156	0.00154	0.00157	0.00155	0.00155	0.00155	0.00155	0.00156	0.00154	0.00153	0.00149	0.00149	0.00147	0.00147	0.00146	0.00147	0.00146	0.00147	0.00144	0.00143	0.00139	0.00136
1357.63	0.00163	0.00162	0.00167	0.00165	0.00163	0.00162	0.00161	0.00156	0.00154	0.00157	0.00155	0.00155	0.00155	0.00156	0.00156	0.00154	0.00153	0.00149	0.00149	0.00147	0.00147	0.00147	0.00147	0.00147	0.00147	0.00145	0.00143	0.00139	0.00136
1359.56	0.00164	0.00163	0.00168	0.00166	0.00164	0.00162	0.00161	0.00157	0.00155	0.00157	0.00156	0.00156	0.00156	0.00157	0.00156	0.00155	0.00153	0.0015	0.0015	0.00148	0.00147	0.00147	0.00148	0.00147	0.00147	0.00145	0.00143	0.00139	0.00136
1361.49	0.00165	0.00164	0.00168	0.00167	0.00165	0.00163	0.00162	0.00157	0.00156	0.00158	0.00157	0.00156	0.00157	0.00158	0.00157	0.00155	0.00154	0.0015	0.0015	0.00148	0.00147	0.00148	0.00149	0.00148	0.00148	0.00146	0.00144	0.0014	0.00137
1363.42	0.00167	0.00165	0.00169	0.00168	0.00166	0.00165	0.00164	0.00158	0.00157	0.00159	0.00158	0.00157	0.00158	0.00158	0.00158	0.00156	0.00155	0.00151	0.00152	0.00149	0.00148	0.00149	0.0015	0.00149	0.00149	0.00146	0.00146	0.00141	0.00138
1365.34	0.00168	0.00167	0.00171	0.0017	0.00168	0.00167	0.00165	0.00159	0.00158	0.0016	0.00159	0.00158	0.00159	0.00159	0.00159	0.00157	0.00157	0.00152	0.00153	0.0015	0.00149	0.0015	0.00151	0.0015	0.00149	0.00147	0.00146	0.00143	0.00138
1367.27	0.0017	0.00168	0.00172	0.00172	0.00169	0.00168	0.00167	0.00161	0.00159	0.00162	0.0016	0.0016	0.0016	0.00161	0.00161	0.00159	0.00158	0.00153	0.00155	0.00152	0.00151	0.00151	0.00152	0.00151	0.0015	0.00149	0.00147	0.00143	0.00139
1369.2	0.00171	0.0017	0.00174	0.00173	0.00171	0.00169	0.00168	0.00163	0.00161	0.00163	0.00162	0.00162	0.00162	0.00162	0.00163	0.0016	0.00159	0.00154	0.00156	0.00153	0.00152	0.00152	0.00154	0.00153	0.00152	0.0015	0.00148	0.00144	0.0014
1371.13	0.00173	0.00171	0.00175	0.00174	0.00172	0.00171	0.00169	0.00164	0.00162	0.00165	0.00163	0.00163	0.00163	0.00163	0.00164	0.00161	0.0016	0.00156	0.00157	0.00154	0.00154	0.00153	0.00155	0.00154	0.00153	0.00151	0.00149	0.00145	0.00142
1373.06	0.00174	0.00173	0.00177	0.00176	0.00173	0.00172	0.0017	0.00165	0.00163	0.00166	0.00164	0.00164	0.00164	0.00165	0.00165	0.00163	0.00161	0.00157	0.00158	0.00155	0.00155	0.00154	0.00156	0.00155	0.00154	0.00152	0.0015	0.00146	0.00142
1374.99	0.00175	0.00174	0.00179	0.00177	0.00175	0.00174	0.00172	0.00166	0.00164	0.00167	0.00165	0.00165	0.00165	0.00165	0.00165	0.00164	0.00162	0.00158	0.00159	0.00156	0.00156	0.00155	0.00156	0.00156	0.00155	0.00153	0.00151	0.00147	0.00143
1376.92	0.00177	0.00176	0.0018	0.00178	0.00176	0.00175	0.00173	0.00168	0.00165	0.00168	0.00167	0.00166	0.00166	0.00166	0.00167	0.00165	0.00163	0.00159	0.00159	0.00157	0.00157	0.00156	0.00157	0.00157	0.00156	0.00153	0.00152	0.00148	0.00144
1378.84	0.00178	0.00177	0.00182	0.00179	0.00178	0.00176	0.00174	0.00169	0.00167	0.0017	0.00168	0.00167	0.00168	0.00168	0.00168	0.00166	0.00165	0.0016	0.0016	0.00157	0.00158	0.00157	0.00158	0.00157	0.00157	0.00155	0.00153	0.00149	0.00145
1380.77	0.00179	0.00179	0.00183	0.00181	0.00179	0.00178	0.00176	0.0017	0.00169	0.00171	0.00169	0.00168	0.00169	0.00169	0.0017	0.00167	0.00166	0.00162	0.00162	0.00158	0.00159	0.00159	0.00159	0.00158	0.00158	0.00156	0.00154	0.0015	0.00146
1382.7	0.00181	0.00181	0.00185	0.00183	0.00181	0.00179	0.00177	0.00172	0.00171	0.00173	0.0017	0.0017	0.00171	0.00171	0.00171	0.00169	0.00168	0.00164	0.00163	0.0016	0.00161	0.0016	0.00161	0.0016	0.0016	0.00157	0.00156	0.00152	0.00147
1384.63	0.00184	0.00183	0.00188	0.00185	0.00184	0.00182	0.0018	0.00175	0.00173	0.00176	0.00173	0.00173	0.00173	0.00173	0.00174	0.00171	0.0017	0.00166	0.00166	0.00163	0.00163	0.00162	0.00163	0.00162	0.00162	0.00159	0.00158	0.00154	0.00149
1386.56	0.00188	0.00187	0.00191	0.00189	0.00188	0.00186	0.00183	0.00178	0.00176	0.00179	0.00176	0.00176	0.00177	0.00177	0.00177	0.00174	0.00173	0.00169	0.0017	0.00167	0.00166	0.00165	0.00167	0.00165	0.00165	0.00163	0.00161	0.00156	0.00152
1388.49	0.00192	0.0019	0.00195	0.00194	0.00192	0.0019	0.00187	0.00182	0.0018	0.00182	0.0018	0.0018	0.0018	0.0018	0.00181	0.00178	0.00177	0.00173	0.00173	0.0017	0.00169	0.00169	0.0017	0.00169	0.00168	0.00166	0.00164	0.00159	0.00155
1390.41	0.00195	0.00194	0.00199	0.00197	0.00195	0.00193	0.00191	0.00185	0.00182	0.00186	0.00183	0.00183	0.00184	0.00184	0.00184	0.00181	0.0018	0.00176	0.00176	0.00172	0.00172	0.00171	0.00173	0.00172	0.00171	0.00169	0.00167	0.00162	0.00157
1392.34	0.00198	0.00197	0.00202	0.002	0.00199	0.00196	0.00194	0.00189	0.00185	0.00188	0.00186	0.00186	0.00187	0.00187	0.00187	0.00184	0.00183	0.00179	0.00178	0.00175	0.00174	0.00174	0.00175	0.00174	0.00174	0.00171	0.00169	0.00165	0.0016
1394.27	0.00202	0.002	0.00205	0.00203	0.00202	0.00198	0.00197	0.00191	0.00188	0.00191	0.00188	0.00189	0.0019	0.00189	0.00189	0.00186	0.00185	0.00181	0.00179	0.00177	0.00176	0.00176	0.00178	0.00177	0.00176	0.00174	0.00171	0.00167	0.00161
1396.2	0.00205	0.00202	0.00208	0.00206	0.00204	0.00201	0.00199	0.00194	0.0019	0.00194	0.00191	0.00191	0.00192	0.00192	0.00192	0.00188	0.00188	0.00183	0.00182	0.00179	0.00179	0.00179	0.0018	0.00179	0.00178	0.00176	0.00173	0.00169	0.00163
1398.13	0.00207	0.00205	0.00211	0.00208	0.00207	0.00203	0.00202	0.00196	0.00193	0.00196	0.00193	0.00194	0.00194	0.00194	0.00194	0.0019	0.0019	0.00185	0.00184	0.00181	0.00181	0.00181	0.00182	0.00181	0.0018	0.00178	0.00175	0.0017	0.00165
1400.06	0.0021	0.00207	0.00213	0.00211	0.00209	0.00206	0.00204	0.00198	0.00195	0.00198	0.00196	0.00196	0.00196	0.00196	0.00196	0.00193	0.00192	0.00188	0.00186	0.00183	0.00183	0.00183	0.00184	0.00182	0.00182	0.00179	0.00177	0.00172	0.00167
1401.99	0.00212	0.0021	0.00216	0.00213	0.00212	0.00208	0.00206	0.00201	0.00197	0.002	0.00198	0.00198	0.00197	0.00198	0.00198	0.00195	0.00194	0.0019	0.00188	0.00185	0.00185	0.00185	0.00186	0.00184	0.00184	0.00181	0.00179	0.00174	0.00168
1403.91	0.00214	0.00213	0.00218	0.00215	0.00214	0.00211	0.00209	0.00203	0.002	0.00203	0.002	0.002	0.00199	0.002	0.00201	0.00197	0.00195	0.00191	0.0019	0.00187	0.00186	0.00186	0.00188	0.00186	0.00185	0.00182	0.0018	0.00175	0.0017
1405.84	0.00217	0.00215	0.0022	0.00218	0.00216	0.00213	0.00211	0.00205	0.00202	0.00205	0.00202	0.00202	0.00202	0.00202	0.00203	0.00199	0.00197	0.00193	0.00191	0.00189	0.00188	0.00188	0.00189	0.00188	0.00187	0.00184	0.00181	0.00176	0.00171
1407.77	0.0022	0.00217	0.00223	0.00221	0.00219	0.00216	0.00213	0.00207	0.00204	0.00207	0.00205	0.00204	0.00204	0.00204	0.00205	0.00202	0.002	0.00195	0.00193	0.00191	0.0019	0.00189	0.00191	0.0019	0.00189	0.00186	0.00183	0.00178	0.00173
1409.7	0.00222	0.0022	0.00226	0.00224	0.00222	0.00219	0.00216	0.0021	0.00207	0.0021	0.00207	0.00206	0.00207	0.00207	0.00207	0.00204	0.00202	0.00197	0.00196	0.00193	0.00192	0.00192	0.00193	0.00192	0.00191	0.00188	0.00185	0.0018	0.00175
1411.63	0.00225	0.00223	0.00229	0.00227	0.00225	0.00222	0.00219	0.00213	0.0021	0.00213	0.0021	0.00209	0.0021	0.0021	0.0021	0.00207	0.00205	0.00199	0.00199	0.00195	0.00194	0.00194	0.00195	0.00194	0.00194	0.00191	0.00188	0.00183	0.00177
1413.56	0.00229	0.00227	0.00233	0.00231	0.00228	0.00225	0.00222	0.00216	0.00214	0.00216	0.00213	0.00212	0.00213	0.00213	0.00213	0.0021	0.00207	0.00202	0.00201	0.00198	0.00197	0.00197	0.00198	0.00197	0.00196	0.00193	0.0019	0.00185	0.00179
1415.48	0.00233	0.00231	0.00236	0.00235	0.00232	0.00228	0.00226	0.00219	0.00217	0.00219	0.00216	0.00216	0.00217	0.00217	0.00216	0.00213	0.0021	0.00205	0.00205	0.00201	0.002	0.00199	0.00201	0.002	0.00199	0.00196	0.00193	0.00187	0.00181
1417.41	0.00237	0.00235	0.00241	0.00238	0.00236	0.00232	0.00229	0.00223	0.0022	0.00223	0.00219	0.00219	0.0022	0.0022	0.00219	0.00216	0.00214	0.00209	0.00207	0.00204	0.00203	0.00202	0.00204	0.00203	0.00202	0.00198	0.00196	0.00189	0.00183
1419.34	0.00241	0.00239	0.00245	0.00242	0.0024	0.00236	0.00233	0.00226	0.00223	0.00226	0.00223	0.00223	0.00222	0.00223	0.00223	0.00219	0.00217	0.00212	0.0021	0.00207	0.00206	0.00205	0.00207	0.00205	0.00204	0.00201	0.00198	0.00192	0.00185
1421.27	0.00244	0.00243	0.00249	0.00246	0.00243	0.0024	0.00237	0.00229	0.00227	0.00229	0.00226	0.00226	0.00226	0.00226	0.00226	0.00222	0.0022	0.00215	0.00213	0.0021	0.00209	0.00208	0.0021	0.00208	0.00207	0.00204	0.00201	0.00195	0.00188
1423.2	0.00248	0.00246	0.00253	0.0025	0.00247	0.00244	0.0024	0.00233	0.0023	0.00233	0.0023	0.00229	0.0023	0.00229	0.0023	0.00226	0.00223	0.00218	0.00216	0.00213	0.00212	0.00211	0.00213	0.00211	0.0021	0.00207	0.00204	0.00198	0.00191
1425.13	0.00252	0.0025	0.00256	0.00253	0.0025	0.00247	0.00244	0.00236	0.00234	0.00236	0.00233	0.00233	0.00233	0.00232	0.00233	0.00229	0.00226	0.00221	0.00219	0.00215	0.00215	0.00214	0.00216	0.00214	0.00213	0.00209	0.00206	0.002	0.00193
1427.06	0.00255	0.00253	0.0026	0.00257	0.00254	0.0025	0.00247	0.0024	0.00237	0.00239	0.00236	0.00235	0.00236	0.00235	0.00235	0.00232	0.00229	0.00224	0.00222	0.00218	0.00218	0.00216	0.00218	0.00216	0.00216	0.00211	0.00209	0.00202	0.00195
1428.98	0.00259	0.00256	0.00263	0.0026	0.00257	0.00253	0.00249	0.00242	0.00239	0.00242	0.00239	0.00238	0.00238	0.00238	0.00238	0.00235	0.00231	0.00226	0.00225	0.00221	0.0022	0.00219	0.00221	0.00219	0.00218	0.00214	0.00211	0.00205	0.00197
1430.91	0.00262	0.0026	0.00266	0.00264	0.0026	0.00256	0.00252	0.00245	0.00242	0.00245	0.00241	0.00241	0.0024	0.0024	0.00241	0.00237	0.00234	0.00228	0.00227	0.00223	0.00222	0.00221	0.00223	0.00221	0.0022	0.00216	0.00213	0.00207	0.00198
1432.84	0.00264	0.00263	0.00269	0.00266	0.00263	0.00258	0.00255	0.00247	0.00245	0.00247	0.00244	0.00243	0.00242	0.00243	0.00243	0.00239	0.00236	0.00231	0.0023	0.00225	0.00224	0.00223	0.00225	0.00223	0.00222	0.00218	0.00215	0.00209	0.002
1434.77	0.00267	0.00266	0.00272	0.00269	0.00265	0.0026	0.00257	0.0025	0.00247	0.0025	0.00246	0.00245	0.00244	0.00245	0.00245	0.00241	0.00238	0.00233	0.00231	0.00227	0.00226	0.00225	0.00227	0.00225	0.00224	0.0022	0.00216	0.0021	0.00201
1436.7	0.00269	0.00268	0.00274	0.00271	0.00267	0.00262	0.0026	0.00252	0.00249	0.00252	0.00247	0.00247	0.00246	0.00247	0.00247	0.00243	0.00239	0.00235	0.00232	0.00228	0.00227	0.00227	0.00228	0.00226	0.00226	0.00221	0.00218	0.00211	0.00203
1438.63	0.00271	0.0027	0.00276	0.00273	0.00269	0.00265	0.00262	0.00254	0.0025	0.00254	0.00249	0.00249	0.00248	0.00249	0.00249	0.00245	0.00241	0.00237	0.00233	0.0023	0.00229	0.00228	0.0023	0.00228	0.00227	0.00223	0.0022	0.00212	0.00204
1440.55	0.00273	0.00272	0.00278	0.00275	0.00271	0.00267	0.00264	0.00256	0.00252	0.00255	0.00251	0.0025	0.0025	0.0025	0.00251	0.00247	0.00243	0.00238	0.00235	0.00231	0.00231	0.0023	0.00231	0.00229	0.00228	0.00225	0.00221	0.00213	0.00205
1442.48	0.00275	0.00274	0.00279	0.00277	0.00273	0.00269	0.00266	0.00257	0.00254	0.00257	0.00252	0.00251	0.00252	0.00252	0.00252	0.00248	0.00244	0.00239	0.00236	0.00232	0.00232	0.00231	0.00232	0.00231	0.0023	0.00226	0.00222	0.00214	0.00206
1444.41	0.00277	0.00275	0.0028	0.00279	0.00275	0.0027	0.00267	0.00258	0.00255	0.00258	0.00254	0.00253	0.00253	0.00253	0.00254	0.00249	0.00245	0.00241	0.00238	0.00233	0.00233	0.00232	0.00233	0.00232	0.00231	0.00226	0.00223	0.00215	0.00207
1446.34	0.00279	0.00277	0.00282	0.00281	0.00277	0.00272	0.00269	0.0026	0.00257	0.0026	0.00255	0.00255	0.00254	0.00255	0.00255	0.0025	0.00247	0.00242	0.00239	0.00234	0.00234	0.00234	0.00235	0.00233	0.00232	0.00227	0.00224	0.00217	0.00208
1448.27	0.00281	0.00279	0.00285	0.00283	0.00279	0.00274	0.00271	0.00262	0.00259	0.00261	0.00257	0.00256	0.00256	0.00256	0.00257	0.00252	0.00248	0.00244	0.0024	0.00236	0.00236	0.00235	0.00236	0.00234	0.00232	0.00228	0.00225	0.00218	0.00209
1450.2	0.00284	0.00281	0.00288	0.00285	0.00281	0.00276	0.00272	0.00264	0.00261	0.00263	0.00258	0.00258	0.00258	0.00258	0.00258	0.00253	0.0025	0.00245	0.00242	0.00238	0.00237	0.00237	0.00238	0.00236	0.00234	0.0023	0.00227	0.00219	0.0021
1452.13	0.00286	0.00283	0.0029	0.00287	0.00283	0.00278	0.00273	0.00267	0.00263	0.00265	0.0026	0.0026	0.00259	0.0026	0.0026	0.00255	0.00252	0.00247	0.00244	0.00239	0.00239	0.00238	0.00239	0.00238	0.00236	0.00231	0.00228	0.0022	0.00211
1454.05	0.00288	0.00285	0.00291	0.00288	0.00285	0.0028	0.00275	0.00268	0.00264	0.00267	0.00262	0.00261	0.00261	0.00262	0.00261	0.00256	0.00253	0.00248	0.00245	0.00241	0.0024	0.00239	0.0024	0.00239	0.00237	0.00232	0.00229	0.00221	0.00213
1455.98	0.0029	0.00287	0.00293	0.00291	0.00287	0.00282	0.00277	0.0027	0.00266	0.00269	0.00264	0.00263	0.00263	0.00264	0.00263	0.00258	0.00255	0.0025	0.00247	0.00242	0.00241	0.0024	0.00242	0.0024	0.00239	0.00234	0.0023	0.00223	0.00214
1457.91	0.00292	0.0029	0.00296	0.00293	0.00289	0.00285	0.0028	0.00272	0.00269	0.00271	0.00266	0.00265	0.00265	0.00266	0.00265	0.0026	0.00256	0.00251	0.00249	0.00244	0.00242	0.00242	0.00243	0.00242	0.00241	0.00235	0.00232	0.00224	0.00215
1459.84	0.00296	0.00293	0.003	0.00296	0.00291	0.00288	0.00283	0.00275	0.00271	0.00273	0.00268	0.00268	0.00267	0.00268	0.00268	0.00262	0.00258	0.00253	0.00251	0.00246	0.00244	0.00244	0.00246	0.00244	0.00243	0.00237	0.00233	0.00225	0.00217
1461.77	0.00299	0.00297	0.00303	0.003	0.00295	0.00291	0.00286	0.00277	0.00274	0.00276	0.00271	0.00271	0.0027	0.0027	0.0027	0.00264	0.00261	0.00256	0.00254	0.00248	0.00247	0.00246	0.00248	0.00246	0.00245	0.00239	0.00236	0.00227	0.00219
1463.7	0.00304	0.00301	0.00308	0.00304	0.00299	0.00295	0.0029	0.00281	0.00278	0.00279	0.00275	0.00275	0.00274	0.00274	0.00274	0.00268	0.00265	0.0026	0.00257	0.00251	0.0025	0.00249	0.00251	0.00249	0.00248	0.00243	0.00239	0.0023	0.00221
1465.62	0.0031	0.00307	0.00314	0.0031	0.00305	0.003	0.00296	0.00286	0.00283	0.00285	0.0028	0.0028	0.00278	0.00279	0.00279	0.00272	0.0027	0.00264	0.00261	0.00256	0.00255	0.00254	0.00256	0.00253	0.00252	0.00247	0.00243	0.00234	0.00224
1467.55	0.00316	0.00314	0.0032	0.00317	0.00313	0.00307	0.00302	0.00293	0.00289	0.00291	0.00286	0.00285	0.00284	0.00285	0.00285	0.00278	0.00275	0.0027	0.00266	0.00261	0.0026	0.00259	0.00261	0.00258	0.00257	0.00251	0.00248	0.00239	0.00229
1469.48	0.00324	0.00321	0.00327	0.00324	0.0032	0.00314	0.00308	0.00299	0.00295	0.00297	0.00292	0.00291	0.00291	0.00291	0.00291	0.00284	0.0028	0.00276	0.00271	0.00266	0.00265	0.00264	0.00266	0.00264	0.00262	0.00256	0.00253	0.00243	0.00233
1471.41	0.00331	0.00327	0.00334	0.00331	0.00327	0.0032	0.00315	0.00306	0.00301	0.00303	0.00299	0.00298	0.00297	0.00297	0.00297	0.0029	0.00286	0.00281	0.00276	0.00272	0.00271	0.00269	0.00271	0.00269	0.00267	0.00261	0.00258	0.00247	0.00237
1473.34	0.00338	0.00334	0.00342	0.00338	0.00334	0.00327	0.00322	0.00313	0.00308	0.0031	0.00305	0.00305	0.00304	0.00304	0.00303	0.00297	0.00293	0.00287	0.00282	0.00278	0.00276	0.00275	0.00277	0.00274	0.00273	0.00267	0.00263	0.00252	0.00242
1475.27	0.00346	0.00342	0.0035	0.00346	0.00342	0.00335	0.0033	0.0032	0.00315	0.00317	0.00312	0.00311	0.00311	0.0031	0.00311	0.00304	0.00299	0.00293	0.00288	0.00284	0.00282	0.00281	0.00283	0.00281	0.00279	0.00273	0.00268	0.00257	0.00247
1477.2	0.00353	0.00349	0.00357	0.00354	0.00349	0.00342	0.00336	0.00326	0.00322	0.00324	0.00318	0.00317	0.00317	0.00316	0.00317	0.0031	0.00305	0.00298	0.00294	0.00289	0.00288	0.00286	0.00288	0.00286	0.00284	0.00278	0.00273	0.00262	0.00252
1479.12	0.00359	0.00356	0.00364	0.0036	0.00354	0.00347	0.00342	0.00332	0.00327	0.00329	0.00323	0.00322	0.00322	0.00322	0.00322	0.00315	0.0031	0.00304	0.003	0.00293	0.00292	0.00291	0.00293	0.00291	0.00289	0.00283	0.00277	0.00267	0.00256
1481.05	0.00364	0.00361	0.00369	0.00366	0.00359	0.00352	0.00347	0.00337	0.00331	0.00334	0.00327	0.00326	0.00327	0.00326	0.00326	0.00319	0.00314	0.00308	0.00304	0.00297	0.00296	0.00295	0.00296	0.00294	0.00292	0.00286	0.00281	0.0027	0.00259
1482.98	0.00369	0.00366	0.00374	0.0037	0.00364	0.00357	0.00351	0.00341	0.00335	0.00338	0.00331	0.0033	0.0033	0.0033	0.0033	0.00322	0.00318	0.00311	0.00308	0.003	0.00299	0.00298	0.003	0.00297	0.00295	0.00289	0.00284	0.00273	0.00261
1484.91	0.00373	0.00371	0.00378	0.00374	0.00369	0.00361	0.00355	0.00344	0.00339	0.00342	0.00335	0.00334	0.00334	0.00334	0.00334	0.00325	0.00321	0.00314	0.00311	0.00304	0.00303	0.00301	0.00303	0.003	0.00298	0.00292	0.00287	0.00276	0.00264
1486.84	0.00378	0.00375	0.00383	0.00378	0.00373	0.00366	0.00359	0.00347	0.00343	0.00345	0.00339	0.00337	0.00337	0.00337	0.00337	0.00329	0.00323	0.00317	0.00314	0.00307	0.00306	0.00304	0.00306	0.00303	0.00301	0.00295	0.00289	0.00278	0.00266
1488.77	0.00382	0.00379	0.00387	0.00382	0.00377	0.0037	0.00363	0.00351	0.00346	0.00348	0.00342	0.00341	0.0034	0.00341	0.0034	0.00332	0.00326	0.0032	0.00316	0.0031	0.00308	0.00307	0.00308	0.00306	0.00304	0.00297	0.00292	0.0028	0.00268
1490.69	0.00385	0.00383	0.00391	0.00386	0.00381	0.00373	0.00367	0.00354	0.0035	0.00352	0.00346	0.00344	0.00343	0.00344	0.00344	0.00335	0.00329	0.00323	0.00319	0.00313	0.00311	0.0031	0.00311	0.00309	0.00307	0.003	0.00295	0.00283	0.0027
1492.62	0.00389	0.00387	0.00395	0.0039	0.00384	0.00377	0.0037	0.00358	0.00353	0.00355	0.00349	0.00348	0.00346	0.00347	0.00347	0.00338	0.00333	0.00326	0.00322	0.00316	0.00314	0.00313	0.00314	0.00311	0.0031	0.00302	0.00297	0.00285	0.00272
1494.55	0.00393	0.00391	0.00399	0.00394	0.00388	0.0038	0.00373	0.00362	0.00357	0.00359	0.00352	0.0035	0.0035	0.0035	0.0035	0.00341	0.00336	0.00329	0.00325	0.00318	0.00316	0.00315	0.00316	0.00314	0.00312	0.00305	0.00299	0.00287	0.00274
1496.48	0.00397	0.00395	0.00403	0.00398	0.00392	0.00384	0.00376	0.00366	0.0036	0.00362	0.00355	0.00353	0.00353	0.00353	0.00353	0.00344	0.00339	0.00332	0.00328	0.00321	0.00319	0.00317	0.00319	0.00316	0.00315	0.00307	0.00302	0.00289	0.00276
1498.41	0.00401	0.00398	0.00406	0.00402	0.00396	0.00388	0.0038	0.00369	0.00363	0.00365	0.00358	0.00356	0.00356	0.00355	0.00355	0.00347	0.00341	0.00334	0.0033	0.00323	0.00321	0.00319	0.00321	0.00318	0.00317	0.0031	0.00304	0.00292	0.00278
1500.34	0.00404	0.00402	0.0041	0.00405	0.00399	0.00391	0.00383	0.00372	0.00365	0.00368	0.00361	0.00359	0.00358	0.00358	0.00358	0.00349	0.00344	0.00337	0.00333	0.00326	0.00323	0.00321	0.00323	0.0032	0.0032	0.00311	0.00306	0.00293	0.00279
1502.27	0.00407	0.00405	0.00413	0.00408	0.00402	0.00393	0.00386	0.00374	0.00368	0.0037	0.00363	0.00362	0.0036	0.0036	0.0036	0.00351	0.00346	0.00339	0.00335	0.00327	0.00324	0.00323	0.00325	0.00322	0.00321	0.00313	0.00307	0.00295	0.0028
1504.19	0.0041	0.00407	0.00416	0.00411	0.00404	0.00395	0.00389	0.00376	0.0037	0.00372	0.00365	0.00363	0.00362	0.00362	0.00362	0.00353	0.00348	0.00341	0.00336	0.00328	0.00326	0.00325	0.00326	0.00323	0.00322	0.00314	0.00308	0.00296	0.00281
1506.12	0.00412	0.0041	0.00418	0.00413	0.00407	0.00398	0.00391	0.00378	0.00372	0.00374	0.00367	0.00365	0.00364	0.00364	0.00364	0.00355	0.00349	0.00342	0.00337	0.0033	0.00327	0.00326	0.00328	0.00325	0.00324	0.00315	0.00309	0.00297	0.00283
1508.05	0.00416	0.00414	0.00422	0.00417	0.00411	0.00401	0.00394	0.00381	0.00375	0.00377	0.0037	0.00368	0.00367	0.00367	0.00367	0.00358	0.00352	0.00345	0.00339	0.00331	0.0033	0.00328	0.0033	0.00327	0.00326	0.00317	0.00311	0.00299	0.00285
1509.98	0.00421	0.00419	0.00427	0.00422	0.00415	0.00406	0.00399	0.00385	0.0038	0.00381	0.00374	0.00372	0.00371	0.00371	0.00371	0.00362	0.00356	0.00348	0.00342	0.00334	0.00333	0.00331	0.00334	0.0033	0.00329	0.00321	0.00314	0.00302	0.00288
1511.91	0.00428	0.00425	0.00434	0.00428	0.00421	0.00412	0.00405	0.00391	0.00385	0.00387	0.00379	0.00377	0.00377	0.00376	0.00376	0.00366	0.00361	0.00352	0.00347	0.00339	0.00338	0.00336	0.00338	0.00335	0.00333	0.00325	0.00318	0.00305	0.00292
1513.84	0.00436	0.00432	0.00442	0.00436	0.00429	0.0042	0.00412	0.00398	0.00392	0.00393	0.00385	0.00383	0.00383	0.00383	0.00383	0.00372	0.00366	0.00358	0.00352	0.00345	0.00343	0.00341	0.00343	0.0034	0.00338	0.0033	0.00323	0.0031	0.00296
1515.76	0.00444	0.0044	0.0045	0.00444	0.00437	0.00427	0.00419	0.00405	0.004	0.00401	0.00392	0.0039	0.00389	0.0039	0.00389	0.00379	0.00372	0.00364	0.00359	0.00351	0.00349	0.00347	0.00349	0.00346	0.00344	0.00335	0.00328	0.00314	0.003
1517.69	0.00452	0.00448	0.00458	0.00452	0.00445	0.00435	0.00427	0.00413	0.00406	0.00408	0.00399	0.00397	0.00396	0.00396	0.00396	0.00385	0.00378	0.0037	0.00364	0.00357	0.00354	0.00353	0.00355	0.00352	0.00349	0.0034	0.00334	0.00319	0.00304
1519.62	0.00459	0.00455	0.00465	0.00459	0.00452	0.00441	0.00433	0.00418	0.00412	0.00414	0.00405	0.00402	0.00402	0.00402	0.00401	0.00391	0.00383	0.00375	0.00368	0.00362	0.00359	0.00358	0.00359	0.00357	0.00353	0.00345	0.00338	0.00323	0.00308
1521.55	0.00465	0.00461	0.0047	0.00465	0.00457	0.00446	0.00438	0.00423	0.00417	0.00418	0.00409	0.00407	0.00406	0.00406	0.00406	0.00395	0.00387	0.00379	0.00372	0.00365	0.00362	0.00361	0.00362	0.0036	0.00357	0.00348	0.00342	0.00327	0.00311
1523.48	0.0047	0.00465	0.00475	0.0047	0.00461	0.0045	0.00442	0.00427	0.00421	0.00421	0.00413	0.00411	0.0041	0.0041	0.00409	0.00398	0.00391	0.00382	0.00375	0.00368	0.00365	0.00364	0.00365	0.00363	0.0036	0.00351	0.00344	0.0033	0.00313
1525.41	0.00474	0.00469	0.00479	0.00474	0.00465	0.00454	0.00445	0.00431	0.00424	0.00425	0.00416	0.00414	0.00413	0.00413	0.00413	0.004	0.00393	0.00385	0.00378	0.0037	0.00368	0.00366	0.00368	0.00365	0.00363	0.00353	0.00346	0.00332	0.00315
1527.34	0.00477	0.00473	0.00483	0.00478	0.00469	0.00458	0.00448	0.00434	0.00427	0.00428	0.00419	0.00417	0.00416	0.00416	0.00415	0.00403	0.00395	0.00387	0.00381	0.00372	0.0037	0.00368	0.0037	0.00367	0.00365	0.00355	0.00348	0.00333	0.00316
1529.26	0.00481	0.00476	0.00486	0.00481	0.00472	0.00461	0.00451	0.00436	0.0043	0.0043	0.00421	0.00419	0.00418	0.00418	0.00418	0.00405	0.00397	0.00389	0.00383	0.00374	0.00371	0.0037	0.00372	0.00369	0.00367	0.00356	0.0035	0.00334	0.00318
1531.19	0.00484	0.00479	0.00489	0.00483	0.00475	0.00463	0.00453	0.00438	0.00431	0.00432	0.00423	0.00421	0.0042	0.0042	0.00419	0.00407	0.00399	0.00391	0.00384	0.00376	0.00373	0.00371	0.00373	0.0037	0.00368	0.00358	0.0035	0.00335	0.00318
1533.12	0.00486	0.00482	0.00492	0.00485	0.00477	0.00465	0.00455	0.0044	0.00433	0.00434	0.00425	0.00421	0.00421	0.00421	0.00421	0.00408	0.004	0.00393	0.00384	0.00377	0.00374	0.00372	0.00375	0.00371	0.00369	0.00359	0.00351	0.00336	0.00319
1535.05	0.00487	0.00483	0.00494	0.00487	0.00478	0.00466	0.00456	0.00441	0.00434	0.00435	0.00426	0.00422	0.00421	0.00421	0.00421	0.00409	0.00401	0.00393	0.00385	0.00378	0.00375	0.00373	0.00375	0.00372	0.0037	0.00359	0.00352	0.00336	0.0032
1536.98	0.00488	0.00484	0.00495	0.00488	0.00479	0.00467	0.00457	0.00442	0.00435	0.00436	0.00427	0.00423	0.00422	0.00422	0.00421	0.0041	0.00402	0.00393	0.00385	0.00378	0.00375	0.00373	0.00375	0.00371	0.0037	0.00359	0.00352	0.00336	0.0032
1538.91	0.00488	0.00485	0.00495	0.00489	0.0048	0.00467	0.00458	0.00442	0.00434	0.00436	0.00427	0.00424	0.00422	0.00422	0.00421	0.0041	0.00402	0.00393	0.00386	0.00377	0.00375	0.00372	0.00375	0.00371	0.00369	0.00359	0.00351	0.00336	0.00319
1540.83	0.00489	0.00486	0.00496	0.0049	0.0048	0.00468	0.00459	0.00443	0.00435	0.00436	0.00427	0.00425	0.00423	0.00422	0.00422	0.0041	0.00402	0.00393	0.00386	0.00377	0.00375	0.00372	0.00375	0.00371	0.00369	0.00359	0.00351	0.00336	0.00319
1542.76	0.00491	0.00487	0.00497	0.00492	0.00482	0.0047	0.0046	0.00444	0.00436	0.00438	0.00428	0.00425	0.00424	0.00423	0.00423	0.0041	0.00403	0.00394	0.00387	0.00378	0.00376	0.00373	0.00375	0.00371	0.0037	0.00359	0.00352	0.00336	0.00319
1544.69	0.00494	0.0049	0.00499	0.00495	0.00485	0.00472	0.00462	0.00446	0.00439	0.00439	0.00429	0.00427	0.00426	0.00425	0.00424	0.00411	0.00404	0.00395	0.00388	0.00379	0.00377	0.00375	0.00376	0.00373	0.00371	0.0036	0.00353	0.00337	0.00319
1546.62	0.00498	0.00493	0.00503	0.00498	0.00488	0.00476	0.00466	0.00449	0.00442	0.00442	0.00432	0.0043	0.00429	0.00427	0.00426	0.00414	0.00406	0.00397	0.0039	0.00381	0.00379	0.00377	0.00378	0.00375	0.00373	0.00362	0.00354	0.00339	0.00321
1548.55	0.00502	0.00497	0.00508	0.00502	0.00492	0.00479	0.00469	0.00453	0.00445	0.00445	0.00435	0.00433	0.00432	0.00431	0.0043	0.00417	0.00409	0.004	0.00393	0.00384	0.00382	0.0038	0.00381	0.00378	0.00376	0.00364	0.00357	0.00341	0.00323
1550.48	0.00506	0.00502	0.00512	0.00506	0.00496	0.00483	0.00473	0.00456	0.00448	0.00449	0.00439	0.00436	0.00435	0.00434	0.00434	0.0042	0.00412	0.00403	0.00396	0.00387	0.00384	0.00382	0.00384	0.00381	0.00379	0.00367	0.00359	0.00343	0.00325
1552.4	0.0051	0.00506	0.00516	0.0051	0.005	0.00487	0.00477	0.0046	0.00452	0.00452	0.00443	0.00439	0.00437	0.00437	0.00437	0.00424	0.00415	0.00406	0.00399	0.00389	0.00386	0.00385	0.00386	0.00384	0.00381	0.00369	0.00362	0.00345	0.00327
1554.33	0.00514	0.0051	0.0052	0.00514	0.00504	0.0049	0.0048	0.00463	0.00455	0.00455	0.00445	0.00442	0.0044	0.0044	0.0044	0.00426	0.00417	0.00409	0.00401	0.00392	0.00389	0.00387	0.00389	0.00386	0.00383	0.00371	0.00364	0.00348	0.00329
1556.26	0.00518	0.00513	0.00524	0.00517	0.00507	0.00494	0.00483	0.00466	0.00457	0.00458	0.00447	0.00445	0.00443	0.00443	0.00442	0.00428	0.0042	0.00411	0.00403	0.00394	0.00391	0.00389	0.00391	0.00388	0.00384	0.00373	0.00366	0.0035	0.00331
1558.19	0.00521	0.00516	0.00528	0.0052	0.0051	0.00497	0.00486	0.00468	0.0046	0.00461	0.0045	0.00447	0.00446	0.00445	0.00444	0.0043	0.00422	0.00413	0.00405	0.00396	0.00393	0.00391	0.00393	0.00389	0.00386	0.00376	0.00368	0.00351	0.00332
1560.12	0.00524	0.0052	0.00531	0.00524	0.00514	0.005	0.00489	0.00471	0.00463	0.00464	0.00453	0.0045	0.00448	0.00448	0.00447	0.00432	0.00424	0.00415	0.00407	0.00398	0.00395	0.00393	0.00395	0.00391	0.00389	0.00378	0.0037	0.00352	0.00334
1562.05	0.00528	0.00523	0.00535	0.00528	0.00518	0.00503	0.00492	0.00474	0.00466	0.00466	0.00456	0.00453	0.0045	0.00451	0.00449	0.00435	0.00427	0.00418	0.00409	0.004	0.00397	0.00395	0.00398	0.00393	0.0039	0.0038	0.00372	0.00354	0.00336
1563.98	0.00531	0.00527	0.00539	0.00531	0.0052	0.00506	0.00495	0.00477	0.00468	0.00468	0.00458	0.00455	0.00453	0.00453	0.00451	0.00437	0.00429	0.0042	0.00412	0.00402	0.00399	0.00397	0.004	0.00395	0.00392	0.00382	0.00374	0.00356	0.00337
1565.9	0.00533	0.00529	0.00541	0.00533	0.00523	0.00509	0.00497	0.00479	0.00471	0.00471	0.0046	0.00457	0.00455	0.00455	0.00453	0.00439	0.00431	0.00421	0.00414	0.00404	0.004	0.00398	0.00401	0.00396	0.00393	0.00383	0.00375	0.00357	0.00338
1567.83	0.00536	0.00532	0.00543	0.00535	0.00525	0.00511	0.00499	0.00481	0.00472	0.00473	0.00462	0.00458	0.00457	0.00457	0.00455	0.0044	0.00432	0.00423	0.00415	0.00405	0.00402	0.004	0.00402	0.00397	0.00395	0.00384	0.00376	0.00358	0.00339
1569.76	0.00538	0.00534	0.00545	0.00537	0.00527	0.00513	0.00501	0.00483	0.00474	0.00475	0.00463	0.0046	0.00459	0.00458	0.00457	0.00442	0.00434	0.00424	0.00417	0.00406	0.00403	0.00401	0.00403	0.00399	0.00396	0.00386	0.00376	0.00359	0.0034
1571.69	0.0054	0.00536	0.00547	0.00539	0.00529	0.00515	0.00502	0.00485	0.00476	0.00476	0.00465	0.00462	0.0046	0.00459	0.00459	0.00444	0.00435	0.00425	0.00418	0.00407	0.00404	0.00402	0.00404	0.004	0.00398	0.00387	0.00377	0.0036	0.00341
1573.62	0.00541	0.00538	0.00548	0.0054	0.0053	0.00516	0.00503	0.00486	0.00478	0.00477	0.00466	0.00462	0.00461	0.0046	0.00459	0.00445	0.00435	0.00426	0.00419	0.00408	0.00405	0.00403	0.00404	0.00401	0.00398	0.00387	0.00378	0.00361	0.00341
1575.55	0.00542	0.00539	0.00549	0.00541	0.0053	0.00516	0.00504	0.00487	0.00478	0.00477	0.00466	0.00463	0.00462	0.0046	0.0046	0.00445	0.00436	0.00426	0.00419	0.00408	0.00406	0.00403	0.00404	0.00401	0.00399	0.00387	0.00378	0.00361	0.00342
1577.47	0.00543	0.0054	0.0055	0.00542	0.00531	0.00516	0.00505	0.00488	0.00479	0.00478	0.00467	0.00464	0.00462	0.00462	0.0046	0.00446	0.00436	0.00427	0.00419	0.00409	0.00407	0.00404	0.00405	0.00402	0.00399	0.00388	0.00379	0.00362	0.00342
1579.4	0.00545	0.00541	0.00551	0.00543	0.00532	0.00518	0.00506	0.00489	0.0048	0.00479	0.00468	0.00465	0.00463	0.00463	0.00461	0.00447	0.00438	0.00428	0.0042	0.0041	0.00407	0.00405	0.00406	0.00403	0.004	0.00389	0.0038	0.00362	0.00342
1581.33	0.00547	0.00542	0.00554	0.00546	0.00535	0.0052	0.00508	0.00491	0.00482	0.00481	0.0047	0.00467	0.00465	0.00465	0.00463	0.00449	0.0044	0.0043	0.00421	0.00412	0.00409	0.00406	0.00407	0.00404	0.00402	0.0039	0.00381	0.00363	0.00343
1583.26	0.0055	0.00544	0.00556	0.00548	0.00537	0.00523	0.0051	0.00493	0.00484	0.00484	0.00472	0.00469	0.00467	0.00467	0.00466	0.00451	0.00442	0.00432	0.00423	0.00413	0.00411	0.00408	0.0041	0.00406	0.00403	0.00391	0.00383	0.00365	0.00345
1585.19	0.00552	0.00547	0.00559	0.00552	0.0054	0.00525	0.00513	0.00495	0.00486	0.00486	0.00474	0.00471	0.00469	0.00469	0.00468	0.00453	0.00444	0.00434	0.00425	0.00415	0.00413	0.0041	0.00412	0.00408	0.00405	0.00393	0.00385	0.00367	0.00347
1587.12	0.00555	0.0055	0.00561	0.00554	0.00542	0.00527	0.00515	0.00497	0.00489	0.00488	0.00477	0.00474	0.00472	0.00471	0.0047	0.00455	0.00446	0.00436	0.00427	0.00417	0.00415	0.00412	0.00414	0.0041	0.00407	0.00395	0.00387	0.00369	0.00348
1589.05	0.00557	0.00552	0.00563	0.00556	0.00545	0.00529	0.00517	0.00499	0.0049	0.0049	0.00479	0.00475	0.00473	0.00473	0.00472	0.00457	0.00448	0.00437	0.00429	0.0042	0.00417	0.00413	0.00416	0.00412	0.00409	0.00397	0.00389	0.0037	0.00349
1590.97	0.00558	0.00554	0.00565	0.00558	0.00547	0.0053	0.00518	0.00501	0.00492	0.00491	0.0048	0.00477	0.00475	0.00474	0.00473	0.00458	0.00449	0.00439	0.0043	0.00421	0.00418	0.00414	0.00417	0.00413	0.0041	0.00397	0.0039	0.00371	0.0035
1592.9	0.00559	0.00555	0.00566	0.00558	0.00548	0.00531	0.00519	0.00501	0.00493	0.00492	0.00481	0.00478	0.00476	0.00475	0.00474	0.00459	0.00449	0.0044	0.00431	0.00421	0.00418	0.00414	0.00417	0.00413	0.00411	0.00398	0.0039	0.00371	0.0035
1594.83	0.0056	0.00555	0.00567	0.00559	0.00548	0.00532	0.0052	0.00502	0.00493	0.00492	0.00482	0.00478	0.00477	0.00475	0.00474	0.00459	0.00449	0.0044	0.00431	0.00421	0.00419	0.00414	0.00417	0.00414	0.00411	0.00398	0.0039	0.00371	0.0035
1596.76	0.00561	0.00557	0.00569	0.0056	0.00549	0.00533	0.00521	0.00502	0.00494	0.00493	0.00482	0.00479	0.00477	0.00476	0.00475	0.00459	0.0045	0.00441	0.00431	0.00422	0.00419	0.00415	0.00417	0.00414	0.00412	0.00399	0.0039	0.00371	0.00351
1598.69	0.00562	0.00559	0.00571	0.00562	0.0055	0.00534	0.00523	0.00504	0.00495	0.00494	0.00484	0.0048	0.00478	0.00477	0.00477	0.0046	0.00451	0.00441	0.00433	0.00423	0.0042	0.00416	0.00419	0.00415	0.00412	0.004	0.00391	0.00372	0.00352
1600.62	0.00564	0.00561	0.00572	0.00564	0.00552	0.00536	0.00525	0.00506	0.00497	0.00497	0.00485	0.00481	0.00479	0.00479	0.00478	0.00462	0.00453	0.00443	0.00435	0.00424	0.00421	0.00418	0.0042	0.00416	0.00413	0.00401	0.00393	0.00373	0.00353
1602.54	0.00567	0.00563	0.00575	0.00566	0.00555	0.00539	0.00527	0.00508	0.00499	0.00499	0.00487	0.00484	0.00482	0.00481	0.0048	0.00464	0.00455	0.00445	0.00437	0.00426	0.00423	0.0042	0.00422	0.00418	0.00415	0.00402	0.00394	0.00375	0.00355
1604.47	0.00571	0.00566	0.00577	0.00569	0.00558	0.00542	0.0053	0.00511	0.00502	0.00501	0.00489	0.00486	0.00485	0.00483	0.00482	0.00466	0.00457	0.00448	0.00439	0.00428	0.00425	0.00422	0.00425	0.0042	0.00418	0.00404	0.00396	0.00376	0.00357
1606.4	0.00574	0.0057	0.00581	0.00573	0.00561	0.00545	0.00533	0.00514	0.00505	0.00504	0.00492	0.00489	0.00487	0.00486	0.00485	0.00469	0.00459	0.0045	0.00441	0.00431	0.00428	0.00425	0.00427	0.00422	0.0042	0.00407	0.00398	0.00378	0.00359
1608.33	0.00579	0.00574	0.00586	0.00578	0.00566	0.00549	0.00536	0.00518	0.00508	0.00508	0.00496	0.00492	0.00491	0.0049	0.00488	0.00472	0.00462	0.00453	0.00443	0.00433	0.00431	0.00428	0.0043	0.00425	0.00423	0.00409	0.00401	0.00381	0.00361
1610.26	0.00584	0.00579	0.00591	0.00583	0.0057	0.00553	0.0054	0.00522	0.00513	0.00512	0.005	0.00497	0.00495	0.00494	0.00492	0.00476	0.00466	0.00457	0.00447	0.00437	0.00434	0.00431	0.00433	0.00428	0.00426	0.00413	0.00404	0.00384	0.00364
1612.19	0.00589	0.00585	0.00597	0.00589	0.00575	0.00559	0.00546	0.00527	0.00517	0.00517	0.00505	0.00501	0.005	0.00498	0.00497	0.0048	0.00471	0.00461	0.00451	0.0044	0.00437	0.00435	0.00437	0.00432	0.0043	0.00417	0.00407	0.00388	0.00367
1614.12	0.00594	0.0059	0.00602	0.00594	0.0058	0.00564	0.00551	0.00531	0.00522	0.00521	0.00509	0.00505	0.00503	0.00502	0.00501	0.00484	0.00475	0.00465	0.00455	0.00444	0.00441	0.00438	0.0044	0.00436	0.00434	0.00421	0.00411	0.00392	0.0037
1616.04	0.00599	0.00595	0.00607	0.00598	0.00585	0.00568	0.00556	0.00535	0.00526	0.00525	0.00513	0.00509	0.00507	0.00506	0.00505	0.00488	0.00478	0.00468	0.00459	0.00447	0.00444	0.00442	0.00443	0.0044	0.00437	0.00424	0.00414	0.00395	0.00372
1617.97	0.00603	0.006	0.00611	0.00602	0.0059	0.00572	0.0056	0.00539	0.0053	0.00529	0.00517	0.00513	0.00511	0.0051	0.00509	0.00492	0.00482	0.00471	0.00462	0.00451	0.00447	0.00445	0.00446	0.00443	0.00439	0.00427	0.00417	0.00397	0.00375
1619.9	0.00608	0.00604	0.00615	0.00606	0.00594	0.00577	0.00564	0.00543	0.00533	0.00533	0.0052	0.00516	0.00514	0.00513	0.00512	0.00496	0.00486	0.00475	0.00465	0.00454	0.00451	0.00448	0.0045	0.00446	0.00442	0.0043	0.0042	0.00399	0.00377
1621.83	0.00612	0.00607	0.0062	0.00611	0.00598	0.00581	0.00568	0.00547	0.00537	0.00537	0.00524	0.0052	0.00518	0.00517	0.00516	0.005	0.00489	0.00478	0.00468	0.00457	0.00454	0.00451	0.00453	0.00449	0.00445	0.00432	0.00423	0.00402	0.0038
1623.76	0.00617	0.00611	0.00624	0.00615	0.00602	0.00585	0.00572	0.00551	0.0054	0.00541	0.00527	0.00524	0.00521	0.0052	0.00519	0.00503	0.00492	0.00482	0.00471	0.0046	0.00457	0.00454	0.00456	0.00452	0.00449	0.00435	0.00426	0.00405	0.00383
1625.69	0.00621	0.00615	0.00629	0.00619	0.00606	0.00589	0.00575	0.00554	0.00544	0.00544	0.0053	0.00527	0.00525	0.00524	0.00523	0.00506	0.00495	0.00484	0.00474	0.00463	0.0046	0.00457	0.00459	0.00454	0.00452	0.00438	0.00428	0.00408	0.00385
1627.61	0.00624	0.00619	0.00632	0.00622	0.00609	0.00593	0.00577	0.00558	0.00547	0.00547	0.00533	0.0053	0.00527	0.00526	0.00525	0.00509	0.00497	0.00486	0.00476	0.00465	0.00462	0.00459	0.00461	0.00456	0.00454	0.0044	0.0043	0.0041	0.00387
1629.54	0.00626	0.00622	0.00635	0.00625	0.00613	0.00595	0.0058	0.0056	0.0055	0.00549	0.00536	0.00532	0.00529	0.00528	0.00528	0.00511	0.00499	0.00488	0.00479	0.00467	0.00464	0.0046	0.00462	0.00458	0.00456	0.00442	0.00432	0.00411	0.00389
1631.47	0.00629	0.00625	0.00638	0.00627	0.00615	0.00598	0.00582	0.00562	0.00552	0.00551	0.00538	0.00534	0.00531	0.0053	0.00529	0.00512	0.00501	0.0049	0.00481	0.00469	0.00466	0.00462	0.00464	0.0046	0.00457	0.00444	0.00433	0.00412	0.0039
1633.4	0.00632	0.00626	0.00639	0.0063	0.00617	0.00599	0.00584	0.00564	0.00553	0.00553	0.00539	0.00535	0.00533	0.00532	0.00531	0.00514	0.00503	0.00492	0.00482	0.0047	0.00467	0.00463	0.00466	0.00461	0.00459	0.00445	0.00434	0.00414	0.00391
1635.33	0.00634	0.00628	0.00641	0.00632	0.00619	0.006	0.00586	0.00566	0.00555	0.00555	0.00541	0.00536	0.00535	0.00534	0.00532	0.00515	0.00505	0.00493	0.00483	0.00471	0.00468	0.00465	0.00467	0.00462	0.0046	0.00446	0.00436	0.00415	0.00392
1637.26	0.00636	0.00631	0.00644	0.00634	0.00621	0.00602	0.00588	0.00567	0.00557	0.00556	0.00543	0.00538	0.00537	0.00536	0.00534	0.00517	0.00506	0.00495	0.00484	0.00473	0.00469	0.00467	0.00469	0.00464	0.00461	0.00448	0.00437	0.00416	0.00393
1639.19	0.00638	0.00633	0.00647	0.00636	0.00622	0.00604	0.0059	0.00569	0.00558	0.00558	0.00545	0.0054	0.00539	0.00538	0.00536	0.00518	0.00507	0.00496	0.00485	0.00475	0.00471	0.00468	0.0047	0.00466	0.00462	0.00449	0.00439	0.00418	0.00394
1641.11	0.0064	0.00634	0.00648	0.00638	0.00624	0.00606	0.00592	0.00571	0.0056	0.00559	0.00546	0.00542	0.0054	0.00539	0.00537	0.00519	0.00508	0.00497	0.00487	0.00476	0.00472	0.00469	0.00471	0.00467	0.00463	0.0045	0.0044	0.00419	0.00395
1643.04	0.00641	0.00636	0.0065	0.0064	0.00626	0.00608	0.00593	0.00572	0.00562	0.00561	0.00547	0.00544	0.00541	0.0054	0.00539	0.00521	0.00509	0.00498	0.00488	0.00477	0.00473	0.0047	0.00472	0.00468	0.00465	0.00451	0.00441	0.0042	0.00396
1644.97	0.00643	0.00638	0.00651	0.00642	0.00628	0.00609	0.00595	0.00574	0.00563	0.00562	0.00549	0.00545	0.00542	0.00541	0.0054	0.00522	0.0051	0.005	0.0049	0.00478	0.00474	0.0047	0.00473	0.00469	0.00466	0.00452	0.00441	0.00421	0.00397
1646.9	0.00644	0.0064	0.00653	0.00644	0.00629	0.0061	0.00596	0.00575	0.00564	0.00563	0.0055	0.00545	0.00544	0.00542	0.00541	0.00522	0.00511	0.00501	0.00491	0.00479	0.00475	0.00472	0.00474	0.0047	0.00466	0.00452	0.00442	0.00422	0.00398
1648.83	0.00646	0.00642	0.00654	0.00645	0.00631	0.00611	0.00598	0.00576	0.00565	0.00564	0.00551	0.00546	0.00545	0.00543	0.00542	0.00523	0.00513	0.00502	0.00492	0.0048	0.00476	0.00473	0.00475	0.00471	0.00467	0.00453	0.00443	0.00422	0.00399
1650.76	0.00647	0.00642	0.00655	0.00647	0.00632	0.00613	0.00598	0.00577	0.00566	0.00565	0.00552	0.00547	0.00545	0.00544	0.00542	0.00524	0.00513	0.00503	0.00493	0.00481	0.00476	0.00474	0.00476	0.00471	0.00468	0.00453	0.00443	0.00423	0.004
1652.68	0.00648	0.00643	0.00656	0.00647	0.00632	0.00614	0.00599	0.00578	0.00567	0.00566	0.00552	0.00547	0.00546	0.00545	0.00543	0.00525	0.00514	0.00504	0.00493	0.00482	0.00477	0.00475	0.00476	0.00472	0.00469	0.00454	0.00444	0.00423	0.004
1654.61	0.0065	0.00645	0.00658	0.00648	0.00634	0.00615	0.006	0.00579	0.00568	0.00567	0.00554	0.00549	0.00547	0.00546	0.00544	0.00526	0.00515	0.00505	0.00494	0.00483	0.00478	0.00476	0.00478	0.00473	0.0047	0.00455	0.00445	0.00423	0.00401
1656.54	0.00652	0.00646	0.0066	0.0065	0.00636	0.00617	0.00602	0.0058	0.0057	0.00569	0.00555	0.00551	0.00548	0.00548	0.00546	0.00527	0.00516	0.00506	0.00494	0.00484	0.00479	0.00477	0.00479	0.00474	0.0047	0.00457	0.00447	0.00425	0.00402
1658.47	0.00654	0.00648	0.00661	0.00651	0.00637	0.00618	0.00603	0.00581	0.0057	0.0057	0.00556	0.00552	0.00549	0.00548	0.00547	0.00528	0.00517	0.00507	0.00495	0.00484	0.00481	0.00478	0.0048	0.00474	0.00471	0.00458	0.00447	0.00426	0.00403
1660.4	0.00654	0.00649	0.00662	0.00651	0.00637	0.00618	0.00604	0.00582	0.00571	0.0057	0.00556	0.00552	0.0055	0.00548	0.00547	0.00529	0.00518	0.00507	0.00496	0.00484	0.00481	0.00478	0.0048	0.00475	0.00471	0.00457	0.00447	0.00426	0.00403
1662.33	0.00654	0.00649	0.00662	0.00652	0.00638	0.00619	0.00604	0.00582	0.00571	0.0057	0.00557	0.00552	0.0055	0.00548	0.00547	0.00528	0.00518	0.00507	0.00496	0.00484	0.00481	0.00477	0.00479	0.00475	0.00471	0.00457	0.00447	0.00426	0.00403
1664.26	0.00654	0.0065	0.00662	0.00652	0.00638	0.00619	0.00603	0.00582	0.00572	0.0057	0.00556	0.00552	0.0055	0.00548	0.00547	0.00528	0.00518	0.00507	0.00496	0.00484	0.00481	0.00477	0.00479	0.00475	0.00471	0.00457	0.00447	0.00425	0.00403
1666.18	0.00654	0.00649	0.00662	0.00652	0.00637	0.00619	0.00603	0.00582	0.00571	0.0057	0.00556	0.00552	0.0055	0.00547	0.00547	0.00528	0.00517	0.00506	0.00496	0.00484	0.00481	0.00477	0.00479	0.00474	0.00471	0.00457	0.00447	0.00425	0.00402
1668.11	0.00654	0.00649	0.00661	0.00652	0.00637	0.00618	0.00602	0.00582	0.0057	0.0057	0.00556	0.00552	0.00549	0.00546	0.00546	0.00528	0.00516	0.00506	0.00496	0.00484	0.0048	0.00477	0.00478	0.00474	0.00471	0.00456	0.00446	0.00424	0.00401
1670.04	0.00653	0.00648	0.00661	0.00651	0.00636	0.00617	0.00602	0.00581	0.0057	0.00569	0.00556	0.00551	0.00549	0.00546	0.00546	0.00527	0.00516	0.00505	0.00495	0.00483	0.00479	0.00476	0.00478	0.00473	0.0047	0.00456	0.00446	0.00424	0.00401
1671.97	0.00652	0.00647	0.00661	0.0065	0.00636	0.00617	0.00602	0.0058	0.00569	0.00568	0.00555	0.0055	0.00548	0.00546	0.00545	0.00526	0.00515	0.00505	0.00494	0.00482	0.00478	0.00475	0.00477	0.00473	0.0047	0.00456	0.00445	0.00423	0.00401
1673.9	0.00651	0.00646	0.0066	0.00649	0.00635	0.00616	0.00601	0.00579	0.00568	0.00567	0.00553	0.00549	0.00547	0.00546	0.00544	0.00525	0.00514	0.00504	0.00493	0.00481	0.00478	0.00475	0.00477	0.00472	0.00469	0.00455	0.00444	0.00423	0.004
1675.83	0.00649	0.00645	0.00658	0.00648	0.00634	0.00614	0.00601	0.00577	0.00567	0.00566	0.00552	0.00548	0.00545	0.00545	0.00543	0.00524	0.00513	0.00503	0.00492	0.0048	0.00477	0.00474	0.00476	0.00471	0.00468	0.00454	0.00443	0.00422	0.00399
1677.75	0.00648	0.00643	0.00656	0.00646	0.00632	0.00612	0.00599	0.00576	0.00565	0.00564	0.0055	0.00547	0.00544	0.00543	0.00542	0.00523	0.00512	0.00501	0.00491	0.00479	0.00476	0.00473	0.00475	0.0047	0.00467	0.00453	0.00442	0.00421	0.00398
1679.68	0.00646	0.00641	0.00654	0.00644	0.0063	0.0061	0.00597	0.00574	0.00563	0.00562	0.00549	0.00545	0.00542	0.00541	0.0054	0.00521	0.00511	0.00499	0.00489	0.00477	0.00474	0.00471	0.00473	0.00468	0.00465	0.00451	0.00441	0.0042	0.00396
1681.61	0.00644	0.00638	0.00652	0.00642	0.00628	0.00609	0.00594	0.00573	0.00561	0.00561	0.00547	0.00543	0.00541	0.00539	0.00538	0.0052	0.00509	0.00498	0.00487	0.00475	0.00472	0.00469	0.00471	0.00466	0.00464	0.0045	0.0044	0.00419	0.00395
1683.54	0.00642	0.00637	0.0065	0.00641	0.00627	0.00607	0.00592	0.00571	0.0056	0.0056	0.00546	0.00542	0.00539	0.00538	0.00537	0.00519	0.00508	0.00497	0.00486	0.00474	0.00471	0.00468	0.00469	0.00466	0.00463	0.00449	0.00439	0.00417	0.00395
1685.47	0.00643	0.00638	0.00651	0.00641	0.00627	0.00608	0.00593	0.00572	0.00561	0.00561	0.00546	0.00542	0.00539	0.00539	0.00537	0.00519	0.00508	0.00497	0.00486	0.00475	0.00471	0.00469	0.0047	0.00466	0.00463	0.00449	0.00438	0.00417	0.00395
1687.4	0.00645	0.0064	0.00653	0.00643	0.00629	0.0061	0.00595	0.00574	0.00563	0.00563	0.00548	0.00544	0.00541	0.0054	0.00539	0.00521	0.0051	0.00499	0.00489	0.00477	0.00473	0.0047	0.00472	0.00468	0.00464	0.00451	0.0044	0.00419	0.00397
1689.33	0.00649	0.00644	0.00657	0.00647	0.00633	0.00613	0.00599	0.00577	0.00566	0.00566	0.00551	0.00547	0.00544	0.00543	0.00542	0.00524	0.00513	0.00502	0.00492	0.00479	0.00476	0.00473	0.00475	0.0047	0.00467	0.00453	0.00442	0.00421	0.00399
1691.25	0.00653	0.00648	0.00661	0.00651	0.00637	0.00617	0.00603	0.00581	0.0057	0.00569	0.00555	0.00551	0.00549	0.00546	0.00546	0.00527	0.00516	0.00505	0.00494	0.00482	0.00479	0.00475	0.00478	0.00473	0.0047	0.00456	0.00445	0.00424	0.00402
1693.18	0.00657	0.00653	0.00666	0.00656	0.00642	0.00621	0.00607	0.00585	0.00574	0.00573	0.00559	0.00554	0.00552	0.0055	0.00549	0.0053	0.00519	0.00509	0.00497	0.00485	0.00482	0.00479	0.00481	0.00477	0.00473	0.00459	0.00448	0.00426	0.00404
1695.11	0.00661	0.00657	0.0067	0.0066	0.00646	0.00625	0.0061	0.00588	0.00577	0.00576	0.00562	0.00557	0.00555	0.00554	0.00552	0.00533	0.00522	0.00512	0.005	0.00488	0.00485	0.00482	0.00483	0.00479	0.00476	0.00461	0.00451	0.00429	0.00406
1697.04	0.00664	0.0066	0.00673	0.00663	0.00649	0.00628	0.00613	0.00591	0.00579	0.00578	0.00564	0.00559	0.00557	0.00556	0.00554	0.00536	0.00524	0.00514	0.00502	0.0049	0.00487	0.00484	0.00485	0.00482	0.00477	0.00463	0.00453	0.00431	0.00408
1698.97	0.00666	0.00662	0.00675	0.00664	0.0065	0.00629	0.00614	0.00592	0.0058	0.00579	0.00566	0.00561	0.00558	0.00557	0.00556	0.00537	0.00526	0.00515	0.00503	0.00492	0.00488	0.00485	0.00486	0.00483	0.00478	0.00464	0.00454	0.00432	0.00409
1700.9	0.00667	0.00662	0.00675	0.00665	0.0065	0.0063	0.00615	0.00593	0.00581	0.0058	0.00566	0.00561	0.00559	0.00557	0.00556	0.00538	0.00527	0.00515	0.00503	0.00492	0.00488	0.00485	0.00487	0.00483	0.00479	0.00465	0.00455	0.00432	0.00409
1702.82	0.00667	0.00663	0.00675	0.00665	0.0065	0.0063	0.00615	0.00592	0.00581	0.0058	0.00566	0.00561	0.00559	0.00557	0.00556	0.00538	0.00526	0.00515	0.00503	0.00492	0.00488	0.00485	0.00487	0.00482	0.00479	0.00465	0.00455	0.00432	0.00409
1704.75	0.00666	0.00662	0.00674	0.00664	0.00649	0.00629	0.00614	0.00591	0.0058	0.00579	0.00565	0.0056	0.00558	0.00556	0.00555	0.00536	0.00525	0.00514	0.00502	0.0049	0.00488	0.00484	0.00486	0.00481	0.00478	0.00464	0.00454	0.00431	0.00408
1706.68	0.00664	0.0066	0.00672	0.00662	0.00648	0.00627	0.00612	0.00589	0.00578	0.00577	0.00563	0.00558	0.00557	0.00555	0.00553	0.00534	0.00523	0.00512	0.00501	0.00489	0.00486	0.00483	0.00484	0.00479	0.00477	0.00462	0.00452	0.0043	0.00406
1708.61	0.00661	0.00657	0.00669	0.00659	0.00645	0.00624	0.00609	0.00587	0.00576	0.00574	0.0056	0.00556	0.00554	0.00552	0.00551	0.00532	0.00521	0.0051	0.00498	0.00487	0.00483	0.0048	0.00481	0.00477	0.00474	0.0046	0.0045	0.00428	0.00404
1710.54	0.00657	0.00652	0.00665	0.00655	0.0064	0.00621	0.00605	0.00583	0.00572	0.0057	0.00556	0.00552	0.00549	0.00548	0.00546	0.00528	0.00517	0.00506	0.00495	0.00484	0.00479	0.00476	0.00477	0.00473	0.0047	0.00456	0.00446	0.00424	0.00401
1712.47	0.00651	0.00645	0.00659	0.00649	0.00634	0.00615	0.00599	0.00577	0.00566	0.00565	0.0055	0.00546	0.00544	0.00542	0.00541	0.00522	0.00511	0.005	0.0049	0.00478	0.00474	0.0047	0.00472	0.00467	0.00464	0.00451	0.00441	0.00419	0.00396
1714.4	0.00642	0.00636	0.0065	0.0064	0.00625	0.00606	0.0059	0.00569	0.00558	0.00557	0.00542	0.00538	0.00536	0.00534	0.00532	0.00514	0.00503	0.00493	0.00483	0.00471	0.00467	0.00463	0.00464	0.0046	0.00457	0.00444	0.00434	0.00412	0.0039
1716.32	0.00631	0.00626	0.00639	0.00629	0.00614	0.00595	0.0058	0.00559	0.00548	0.00547	0.00532	0.00529	0.00526	0.00524	0.00523	0.00504	0.00494	0.00483	0.00474	0.00462	0.00458	0.00454	0.00456	0.00451	0.00449	0.00436	0.00425	0.00404	0.00382
1718.25	0.0062	0.00615	0.00628	0.00618	0.00603	0.00584	0.0057	0.00549	0.00538	0.00536	0.00523	0.00519	0.00516	0.00514	0.00513	0.00495	0.00484	0.00474	0.00464	0.00452	0.00449	0.00446	0.00447	0.00442	0.0044	0.00427	0.00416	0.00396	0.00375
1720.18	0.00612	0.00607	0.00619	0.00609	0.00594	0.00576	0.00562	0.00541	0.0053	0.00528	0.00516	0.00511	0.00508	0.00506	0.00505	0.00488	0.00476	0.00467	0.00457	0.00445	0.00442	0.00439	0.0044	0.00436	0.00433	0.0042	0.0041	0.0039	0.00369
1722.11	0.00608	0.00603	0.00615	0.00605	0.0059	0.00572	0.00558	0.00537	0.00526	0.00524	0.00512	0.00507	0.00504	0.00502	0.00501	0.00484	0.00473	0.00463	0.00453	0.00442	0.00438	0.00435	0.00437	0.00432	0.0043	0.00417	0.00406	0.00387	0.00366
1724.04	0.00609	0.00604	0.00616	0.00605	0.00592	0.00573	0.00558	0.00538	0.00527	0.00525	0.00512	0.00508	0.00505	0.00503	0.00501	0.00484	0.00474	0.00464	0.00453	0.00443	0.00439	0.00436	0.00437	0.00433	0.0043	0.00417	0.00407	0.00387	0.00367
1725.97	0.00615	0.00609	0.00621	0.00611	0.00597	0.00578	0.00563	0.00543	0.00532	0.0053	0.00516	0.00512	0.0051	0.00508	0.00506	0.00489	0.00478	0.00468	0.00457	0.00447	0.00443	0.0044	0.00441	0.00437	0.00434	0.00422	0.00411	0.00391	0.0037
1727.89	0.00623	0.00618	0.0063	0.00619	0.00606	0.00586	0.00571	0.0055	0.0054	0.00538	0.00524	0.0052	0.00517	0.00515	0.00514	0.00497	0.00486	0.00475	0.00464	0.00454	0.00451	0.00447	0.00448	0.00444	0.00441	0.00428	0.00418	0.00398	0.00376
1729.82	0.00634	0.00628	0.00641	0.0063	0.00617	0.00596	0.00582	0.0056	0.0055	0.00548	0.00534	0.0053	0.00527	0.00525	0.00524	0.00506	0.00495	0.00484	0.00474	0.00462	0.00459	0.00455	0.00456	0.00453	0.0045	0.00437	0.00426	0.00406	0.00384
1731.75	0.00645	0.0064	0.00653	0.00642	0.00628	0.00608	0.00593	0.00571	0.0056	0.00559	0.00544	0.0054	0.00537	0.00535	0.00535	0.00516	0.00505	0.00494	0.00484	0.00472	0.00469	0.00464	0.00466	0.00463	0.00459	0.00446	0.00435	0.00414	0.00392
1733.68	0.00657	0.00652	0.00666	0.00655	0.0064	0.0062	0.00604	0.00582	0.00571	0.0057	0.00556	0.00551	0.00548	0.00547	0.00546	0.00527	0.00515	0.00505	0.00493	0.00481	0.00478	0.00474	0.00476	0.00472	0.00468	0.00455	0.00444	0.00423	0.004
1735.61	0.0067	0.00665	0.00678	0.00668	0.00653	0.00633	0.00617	0.00594	0.00583	0.00582	0.00567	0.00562	0.0056	0.00558	0.00557	0.00538	0.00526	0.00515	0.00503	0.00492	0.00488	0.00485	0.00486	0.00482	0.00478	0.00465	0.00454	0.00432	0.00409
1737.54	0.00684	0.00678	0.00692	0.00682	0.00666	0.00645	0.00629	0.00606	0.00595	0.00593	0.00578	0.00574	0.00571	0.00569	0.00568	0.00549	0.00537	0.00526	0.00513	0.00502	0.00498	0.00495	0.00497	0.00493	0.00489	0.00475	0.00464	0.00442	0.00418
1739.46	0.00697	0.00691	0.00705	0.00695	0.00679	0.00657	0.00641	0.00618	0.00606	0.00605	0.00589	0.00585	0.00582	0.00581	0.00579	0.0056	0.00548	0.00537	0.00524	0.00513	0.00509	0.00505	0.00507	0.00503	0.00499	0.00484	0.00474	0.00451	0.00427
1741.39	0.00711	0.00704	0.00719	0.00708	0.00692	0.0067	0.00654	0.0063	0.00618	0.00617	0.00601	0.00596	0.00594	0.00592	0.00591	0.00572	0.00559	0.00547	0.00534	0.00523	0.00519	0.00516	0.00517	0.00513	0.00509	0.00494	0.00483	0.0046	0.00435
1743.32	0.00724	0.00718	0.00733	0.00722	0.00705	0.00683	0.00666	0.00642	0.0063	0.00628	0.00613	0.00608	0.00605	0.00604	0.00603	0.00583	0.0057	0.00558	0.00544	0.00533	0.0053	0.00526	0.00528	0.00523	0.00519	0.00503	0.00493	0.00469	0.00444
1745.25	0.00736	0.00731	0.00746	0.00735	0.00717	0.00695	0.00678	0.00654	0.00641	0.0064	0.00624	0.00619	0.00616	0.00614	0.00614	0.00593	0.00581	0.00568	0.00555	0.00543	0.00539	0.00536	0.00537	0.00533	0.00529	0.00513	0.00502	0.00478	0.00453
1747.18	0.00747	0.00742	0.00757	0.00746	0.00728	0.00707	0.00689	0.00664	0.00652	0.0065	0.00634	0.00629	0.00626	0.00624	0.00624	0.00603	0.0059	0.00577	0.00565	0.00552	0.00548	0.00544	0.00546	0.00541	0.00537	0.00522	0.0051	0.00486	0.0046
1749.11	0.00757	0.00752	0.00768	0.00755	0.00738	0.00717	0.00698	0.00673	0.0066	0.00659	0.00643	0.00638	0.00635	0.00633	0.00632	0.00611	0.00598	0.00585	0.00572	0.00559	0.00555	0.00552	0.00554	0.00548	0.00545	0.00529	0.00517	0.00493	0.00467
1751.04	0.00766	0.00761	0.00777	0.00764	0.00747	0.00725	0.00706	0.00681	0.00668	0.00667	0.0065	0.00646	0.00643	0.00641	0.0064	0.00618	0.00605	0.00592	0.00578	0.00566	0.00562	0.00558	0.0056	0.00555	0.00551	0.00535	0.00523	0.00499	0.00473
1752.96	0.00774	0.00768	0.00785	0.00772	0.00755	0.00732	0.00714	0.00688	0.00675	0.00673	0.00657	0.00652	0.00649	0.00647	0.00646	0.00624	0.00612	0.00598	0.00585	0.00572	0.00567	0.00564	0.00566	0.00561	0.00557	0.0054	0.00529	0.00504	0.00477
1754.89	0.0078	0.00775	0.00791	0.00778	0.00761	0.00738	0.0072	0.00694	0.00681	0.00679	0.00662	0.00658	0.00655	0.00653	0.00652	0.0063	0.00616	0.00603	0.0059	0.00577	0.00572	0.00569	0.00571	0.00566	0.00563	0.00545	0.00533	0.00508	0.00481
1756.82	0.00785	0.0078	0.00796	0.00784	0.00766	0.00742	0.00725	0.00698	0.00685	0.00684	0.00667	0.00662	0.00659	0.00657	0.00656	0.00634	0.0062	0.00608	0.00594	0.00581	0.00577	0.00573	0.00575	0.0057	0.00567	0.00549	0.00537	0.00511	0.00485
1758.75	0.0079	0.00784	0.008	0.00788	0.0077	0.00746	0.00729	0.00701	0.00689	0.00687	0.0067	0.00665	0.00662	0.0066	0.0066	0.00638	0.00624	0.00612	0.00597	0.00584	0.0058	0.00576	0.00578	0.00573	0.0057	0.00552	0.0054	0.00514	0.00488
1760.68	0.00793	0.00787	0.00804	0.00792	0.00774	0.0075	0.00732	0.00705	0.00692	0.0069	0.00673	0.00669	0.00665	0.00664	0.00663	0.00641	0.00627	0.00615	0.00601	0.00586	0.00583	0.00579	0.00581	0.00576	0.00572	0.00555	0.00542	0.00517	0.00491
1762.61	0.00797	0.0079	0.00807	0.00795	0.00777	0.00754	0.00736	0.00708	0.00695	0.00694	0.00676	0.00672	0.00668	0.00667	0.00666	0.00643	0.0063	0.00617	0.00604	0.00589	0.00585	0.00582	0.00583	0.00578	0.00574	0.00558	0.00545	0.0052	0.00493
1764.53	0.008	0.00794	0.00811	0.00799	0.0078	0.00757	0.00738	0.00711	0.00698	0.00697	0.00679	0.00674	0.00672	0.0067	0.00668	0.00646	0.00633	0.0062	0.00606	0.00591	0.00588	0.00584	0.00586	0.00581	0.00577	0.0056	0.00547	0.00522	0.00495
1766.46	0.00803	0.00797	0.00813	0.00802	0.00783	0.0076	0.00741	0.00714	0.007	0.00699	0.00681	0.00677	0.00675	0.00672	0.00671	0.00648	0.00635	0.00622	0.00608	0.00593	0.0059	0.00586	0.00589	0.00583	0.00579	0.00562	0.0055	0.00524	0.00497
1768.39	0.00805	0.008	0.00816	0.00805	0.00786	0.00763	0.00743	0.00716	0.00703	0.00701	0.00684	0.0068	0.00677	0.00675	0.00673	0.00651	0.00637	0.00625	0.0061	0.00596	0.00593	0.00588	0.0059	0.00585	0.00581	0.00564	0.00552	0.00525	0.00498
1770.32	0.00808	0.00803	0.00819	0.00807	0.00789	0.00766	0.00746	0.00718	0.00705	0.00704	0.00686	0.00682	0.00679	0.00677	0.00675	0.00653	0.00639	0.00627	0.00612	0.00598	0.00595	0.0059	0.00592	0.00587	0.00583	0.00566	0.00554	0.00527	0.00499
1772.25	0.00811	0.00805	0.00822	0.0081	0.00792	0.00768	0.00748	0.00721	0.00707	0.00706	0.00689	0.00684	0.00682	0.0068	0.00678	0.00655	0.00642	0.00628	0.00614	0.00601	0.00596	0.00592	0.00594	0.00589	0.00585	0.00568	0.00556	0.00529	0.00501
1774.18	0.00814	0.00808	0.00825	0.00813	0.00795	0.0077	0.00751	0.00724	0.0071	0.00709	0.00692	0.00686	0.00684	0.00682	0.0068	0.00658	0.00644	0.00631	0.00617	0.00603	0.00598	0.00595	0.00597	0.00591	0.00588	0.0057	0.00558	0.00532	0.00504
1776.11	0.00817	0.00812	0.00828	0.00816	0.00798	0.00773	0.00754	0.00728	0.00713	0.00712	0.00695	0.00689	0.00687	0.00685	0.00683	0.00661	0.00646	0.00633	0.0062	0.00605	0.006	0.00597	0.006	0.00594	0.0059	0.00573	0.0056	0.00534	0.00506
1778.03	0.0082	0.00814	0.00831	0.00819	0.008	0.00776	0.00757	0.0073	0.00716	0.00714	0.00697	0.00692	0.00689	0.00688	0.00686	0.00663	0.00649	0.00636	0.00622	0.00607	0.00603	0.00599	0.00602	0.00596	0.00592	0.00575	0.00562	0.00536	0.00508
1779.96	0.00823	0.00818	0.00834	0.00821	0.00803	0.00779	0.0076	0.00733	0.00719	0.00717	0.007	0.00695	0.00692	0.0069	0.00688	0.00665	0.00651	0.00639	0.00625	0.00609	0.00606	0.00602	0.00604	0.00598	0.00594	0.00578	0.00564	0.00538	0.0051
1781.89	0.00826	0.00821	0.00837	0.00824	0.00806	0.00782	0.00763	0.00735	0.00721	0.00719	0.00702	0.00697	0.00694	0.00693	0.00691	0.00668	0.00653	0.00641	0.00628	0.00611	0.00608	0.00604	0.00607	0.006	0.00597	0.0058	0.00566	0.0054	0.00512
1783.82	0.00829	0.00823	0.00841	0.00828	0.00809	0.00784	0.00766	0.00738	0.00724	0.00722	0.00705	0.007	0.00697	0.00695	0.00694	0.00671	0.00656	0.00643	0.0063	0.00613	0.0061	0.00606	0.0061	0.00603	0.00599	0.00582	0.00568	0.00542	0.00514
1785.75	0.00832	0.00826	0.00844	0.00831	0.00812	0.00787	0.00768	0.00741	0.00727	0.00726	0.00708	0.00702	0.00699	0.00698	0.00697	0.00673	0.00658	0.00646	0.00632	0.00616	0.00613	0.00608	0.00612	0.00605	0.00602	0.00583	0.00571	0.00544	0.00516
1787.68	0.00836	0.00829	0.00848	0.00834	0.00816	0.0079	0.00771	0.00743	0.00729	0.00729	0.0071	0.00705	0.00702	0.007	0.00699	0.00676	0.00661	0.00648	0.00634	0.00618	0.00615	0.0061	0.00614	0.00607	0.00604	0.00586	0.00573	0.00547	0.00518
1789.6	0.00838	0.00832	0.00851	0.00838	0.00819	0.00793	0.00774	0.00746	0.00732	0.00731	0.00713	0.00707	0.00705	0.00703	0.00702	0.00678	0.00664	0.0065	0.00637	0.00621	0.00617	0.00613	0.00616	0.0061	0.00605	0.00588	0.00575	0.00549	0.0052
1791.53	0.00841	0.00835	0.00854	0.0084	0.00821	0.00796	0.00777	0.00749	0.00734	0.00733	0.00715	0.0071	0.00707	0.00705	0.00704	0.0068	0.00666	0.00653	0.00639	0.00623	0.00619	0.00615	0.00618	0.00611	0.00608	0.0059	0.00577	0.00551	0.00522
1793.46	0.00844	0.00838	0.00857	0.00842	0.00824	0.00799	0.00779	0.00752	0.00737	0.00735	0.00718	0.00712	0.0071	0.00708	0.00706	0.00683	0.00668	0.00655	0.00641	0.00626	0.00622	0.00617	0.0062	0.00613	0.0061	0.00592	0.00579	0.00552	0.00524
1795.39	0.00847	0.00841	0.00859	0.00845	0.00827	0.00802	0.00782	0.00754	0.0074	0.00738	0.0072	0.00715	0.00712	0.00711	0.00709	0.00685	0.00671	0.00657	0.00642	0.00628	0.00624	0.0062	0.00622	0.00615	0.00612	0.00594	0.00581	0.00554	0.00526
1797.32	0.0085	0.00843	0.00861	0.00847	0.0083	0.00804	0.00784	0.00757	0.00743	0.0074	0.00722	0.00717	0.00714	0.00713	0.00711	0.00687	0.00673	0.00659	0.00645	0.0063	0.00625	0.00622	0.00624	0.00618	0.00615	0.00596	0.00583	0.00556	0.00528
1799.25	0.00852	0.00846	0.00864	0.0085	0.00832	0.00806	0.00787	0.00759	0.00745	0.00742	0.00725	0.00719	0.00716	0.00715	0.00714	0.0069	0.00675	0.00661	0.00647	0.00632	0.00627	0.00624	0.00626	0.0062	0.00617	0.00598	0.00585	0.00558	0.00529
1801.18	0.00854	0.00849	0.00867	0.00852	0.00834	0.00808	0.00789	0.00761	0.00747	0.00744	0.00727	0.00721	0.00718	0.00717	0.00715	0.00692	0.00677	0.00663	0.0065	0.00633	0.00629	0.00626	0.00628	0.00622	0.00618	0.006	0.00587	0.00559	0.00531
1803.1	0.00856	0.0085	0.00868	0.00854	0.00835	0.0081	0.00792	0.00762	0.00748	0.00746	0.00729	0.00723	0.0072	0.00719	0.00717	0.00693	0.00678	0.00665	0.00651	0.00635	0.00631	0.00627	0.0063	0.00624	0.00619	0.00602	0.00588	0.00561	0.00533
1805.03	0.00858	0.00852	0.0087	0.00856	0.00837	0.00812	0.00793	0.00763	0.0075	0.00748	0.0073	0.00725	0.00722	0.0072	0.00718	0.00694	0.0068	0.00666	0.00653	0.00637	0.00632	0.00628	0.00631	0.00625	0.0062	0.00603	0.0059	0.00562	0.00534
1806.96	0.00859	0.00853	0.00872	0.00857	0.00838	0.00814	0.00795	0.00765	0.00751	0.00749	0.00731	0.00726	0.00723	0.00721	0.00719	0.00696	0.00681	0.00667	0.00654	0.00638	0.00633	0.00629	0.00633	0.00627	0.00621	0.00604	0.00591	0.00563	0.00535
1808.89	0.00861	0.00855	0.00874	0.00859	0.0084	0.00816	0.00796	0.00766	0.00752	0.0075	0.00733	0.00728	0.00724	0.00722	0.00721	0.00697	0.00682	0.00668	0.00655	0.00639	0.00635	0.00631	0.00634	0.00628	0.00623	0.00605	0.00592	0.00565	0.00536
1810.82	0.00863	0.00857	0.00875	0.00861	0.00843	0.00818	0.00798	0.00768	0.00754	0.00752	0.00734	0.00729	0.00726	0.00724	0.00723	0.00699	0.00684	0.0067	0.00656	0.00641	0.00637	0.00632	0.00635	0.00629	0.00624	0.00606	0.00593	0.00566	0.00537
1812.75	0.00865	0.00858	0.00877	0.00863	0.00845	0.00819	0.00799	0.0077	0.00756	0.00754	0.00736	0.00731	0.00727	0.00726	0.00725	0.007	0.00685	0.00671	0.00657	0.00642	0.00638	0.00634	0.00636	0.0063	0.00625	0.00607	0.00594	0.00568	0.00539
1814.67	0.00867	0.0086	0.00879	0.00864	0.00847	0.00821	0.008	0.00771	0.00757	0.00756	0.00738	0.00733	0.00729	0.00727	0.00726	0.00701	0.00687	0.00673	0.00658	0.00644	0.0064	0.00635	0.00637	0.00632	0.00627	0.00609	0.00596	0.00569	0.0054
1816.6	0.00868	0.00862	0.00881	0.00866	0.00848	0.00822	0.00802	0.00773	0.00758	0.00757	0.00739	0.00734	0.0073	0.00728	0.00727	0.00703	0.00688	0.00674	0.00661	0.00645	0.00641	0.00636	0.00638	0.00634	0.00629	0.00611	0.00598	0.0057	0.00541
1818.53	0.00869	0.00864	0.00882	0.00868	0.0085	0.00824	0.00804	0.00774	0.0076	0.00758	0.00741	0.00735	0.00732	0.00729	0.00728	0.00705	0.0069	0.00676	0.00663	0.00646	0.00642	0.00637	0.0064	0.00635	0.0063	0.00612	0.00599	0.00572	0.00543
1820.46	0.00871	0.00866	0.00883	0.0087	0.00851	0.00825	0.00806	0.00775	0.00761	0.0076	0.00742	0.00737	0.00733	0.00731	0.0073	0.00707	0.00692	0.00678	0.00664	0.00648	0.00643	0.00638	0.00642	0.00636	0.00632	0.00613	0.006	0.00573	0.00544
1822.39	0.00872	0.00867	0.00884	0.00871	0.00852	0.00826	0.00806	0.00777	0.00763	0.00762	0.00742	0.00737	0.00734	0.00732	0.00731	0.00707	0.00693	0.00679	0.00663	0.00649	0.00645	0.00639	0.00643	0.00637	0.00633	0.00614	0.00601	0.00574	0.00545
1824.32	0.00873	0.00868	0.00885	0.00872	0.00853	0.00827	0.00807	0.00778	0.00763	0.00763	0.00743	0.00738	0.00735	0.00733	0.00732	0.00708	0.00694	0.0068	0.00663	0.0065	0.00646	0.00641	0.00644	0.00638	0.00634	0.00616	0.00603	0.00575	0.00546
1826.25	0.00874	0.00869	0.00886	0.00873	0.00854	0.00828	0.00808	0.00779	0.00764	0.00764	0.00744	0.0074	0.00736	0.00734	0.00733	0.00709	0.00695	0.00681	0.00663	0.00651	0.00647	0.00642	0.00645	0.00638	0.00635	0.00617	0.00604	0.00575	0.00546
1828.17	0.00875	0.0087	0.00887	0.00875	0.00855	0.0083	0.00809	0.0078	0.00765	0.00765	0.00745	0.00741	0.00737	0.00735	0.00734	0.0071	0.00696	0.00682	0.00664	0.00651	0.00647	0.00643	0.00645	0.0064	0.00635	0.00617	0.00604	0.00577	0.00547
1830.1	0.00876	0.0087	0.00888	0.00876	0.00856	0.00831	0.0081	0.00781	0.00766	0.00765	0.00746	0.00741	0.00738	0.00736	0.00735	0.00711	0.00697	0.00683	0.00665	0.00652	0.00648	0.00644	0.00646	0.00641	0.00636	0.00618	0.00605	0.00577	0.00547
1832.03	0.00877	0.00872	0.00889	0.00877	0.00857	0.00832	0.00811	0.00782	0.00768	0.00766	0.00747	0.00742	0.00739	0.00737	0.00736	0.00712	0.00698	0.00684	0.00668	0.00653	0.00649	0.00645	0.00648	0.00642	0.00637	0.00619	0.00605	0.00578	0.00548
1833.96	0.00879	0.00873	0.0089	0.00879	0.00859	0.00833	0.00812	0.00783	0.00769	0.00767	0.00749	0.00743	0.0074	0.00738	0.00737	0.00713	0.00699	0.00685	0.0067	0.00654	0.0065	0.00646	0.00649	0.00643	0.00638	0.00621	0.00606	0.00578	0.00549
1835.89	0.0088	0.00873	0.00892	0.00879	0.0086	0.00833	0.00813	0.00784	0.0077	0.00767	0.0075	0.00744	0.00741	0.0074	0.00739	0.00714	0.007	0.00686	0.0067	0.00655	0.00651	0.00647	0.00649	0.00644	0.00638	0.00622	0.00608	0.00579	0.0055
1837.82	0.00881	0.00874	0.00892	0.0088	0.0086	0.00834	0.00815	0.00785	0.00771	0.00768	0.00751	0.00746	0.00742	0.00742	0.0074	0.00714	0.00701	0.00687	0.0067	0.00655	0.00652	0.00647	0.0065	0.00645	0.00639	0.00622	0.00609	0.00581	0.00551
1839.74	0.00882	0.00875	0.00892	0.00881	0.00861	0.00835	0.00816	0.00786	0.00771	0.00769	0.00752	0.00746	0.00743	0.00742	0.0074	0.00715	0.00701	0.00688	0.00669	0.00657	0.00653	0.00648	0.00651	0.00646	0.0064	0.00623	0.0061	0.00582	0.00552
1841.67	0.00882	0.00876	0.00892	0.00882	0.00862	0.00837	0.00816	0.00787	0.00772	0.0077	0.00753	0.00746	0.00744	0.00743	0.0074	0.00716	0.00702	0.00689	0.0067	0.00658	0.00653	0.00649	0.00652	0.00647	0.00642	0.00624	0.00611	0.00582	0.00552
1843.6	0.00883	0.00877	0.00894	0.00882	0.00863	0.00838	0.00817	0.00788	0.00773	0.00772	0.00753	0.00747	0.00745	0.00743	0.00741	0.00717	0.00703	0.00689	0.00672	0.00658	0.00653	0.0065	0.00652	0.00647	0.00643	0.00625	0.00611	0.00583	0.00552
1845.53	0.00884	0.00878	0.00897	0.00883	0.00864	0.00839	0.00818	0.00789	0.00774	0.00773	0.00754	0.00748	0.00746	0.00744	0.00743	0.00718	0.00704	0.0069	0.00675	0.00659	0.00654	0.00651	0.00653	0.00648	0.00644	0.00626	0.00612	0.00584	0.00553
1847.46	0.00885	0.00878	0.00899	0.00884	0.00864	0.00839	0.00819	0.0079	0.00775	0.00773	0.00755	0.00748	0.00747	0.00745	0.00744	0.00719	0.00705	0.00691	0.00676	0.0066	0.00655	0.00651	0.00655	0.00649	0.00645	0.00627	0.00613	0.00585	0.00555
1849.39	0.00887	0.00878	0.009	0.00886	0.00864	0.00839	0.00821	0.00791	0.00776	0.00774	0.00756	0.00749	0.00748	0.00745	0.00745	0.00719	0.00706	0.00692	0.00676	0.00661	0.00655	0.00652	0.00655	0.00649	0.00645	0.00627	0.00614	0.00586	0.00556
1851.32	0.00888	0.00879	0.009	0.00886	0.00865	0.0084	0.00822	0.00791	0.00776	0.00775	0.00757	0.0075	0.00748	0.00746	0.00745	0.0072	0.00706	0.00692	0.00677	0.00662	0.00656	0.00653	0.00655	0.0065	0.00646	0.00628	0.00614	0.00587	0.00557
1853.24	0.00887	0.00881	0.009	0.00886	0.00866	0.00841	0.00822	0.00791	0.00777	0.00776	0.00758	0.00751	0.00749	0.00747	0.00745	0.00721	0.00706	0.00693	0.00678	0.00662	0.00656	0.00655	0.00656	0.00652	0.00646	0.00628	0.00614	0.00588	0.00557
1855.17	0.00886	0.00882	0.009	0.00887	0.00866	0.00841	0.00822	0.00792	0.00778	0.00778	0.00759	0.00753	0.0075	0.00749	0.00746	0.00722	0.00707	0.00694	0.00679	0.00663	0.00657	0.00656	0.00656	0.00652	0.00647	0.00628	0.00615	0.00588	0.00558
1857.1	0.00887	0.00881	0.00901	0.00889	0.00867	0.00841	0.00822	0.00793	0.00778	0.00779	0.00759	0.00754	0.00751	0.00749	0.00747	0.00723	0.00708	0.00695	0.0068	0.00665	0.00658	0.00656	0.00657	0.00652	0.00649	0.00629	0.00615	0.00587	0.00558
1859.03	0.00888	0.0088	0.00902	0.0089	0.00869	0.00842	0.00822	0.00794	0.00779	0.0078	0.00759	0.00755	0.00752	0.00749	0.00748	0.00724	0.00709	0.00696	0.00679	0.00666	0.00658	0.00656	0.00658	0.00652	0.00652	0.00629	0.00616	0.00588	0.00559
1860.96	0.0089	0.00881	0.00903	0.0089	0.0087	0.00843	0.00823	0.00794	0.00779	0.00781	0.00759	0.00756	0.00752	0.0075	0.00748	0.00725	0.0071	0.00697	0.00678	0.00666	0.00658	0.00656	0.0066	0.00652	0.00654	0.0063	0.00617	0.00589	0.0056
1862.89	0.00891	0.00882	0.00903	0.0089	0.0087	0.00844	0.00824	0.00795	0.0078	0.0078	0.0076	0.00756	0.00752	0.00751	0.00749	0.00726	0.00711	0.00698	0.00678	0.00665	0.00659	0.00658	0.0066	0.00652	0.00653	0.00631	0.00618	0.00591	0.0056
1864.81	0.00892	0.00882	0.00904	0.0089	0.0087	0.00844	0.00825	0.00795	0.00781	0.00778	0.0076	0.00756	0.00752	0.00752	0.00749	0.00726	0.00712	0.00698	0.0068	0.00666	0.0066	0.0066	0.00661	0.00653	0.00651	0.00631	0.00619	0.00592	0.00561
1866.74	0.00893	0.00882	0.00905	0.0089	0.00871	0.00845	0.00825	0.00796	0.00782	0.00779	0.00762	0.00757	0.00754	0.00753	0.00749	0.00726	0.00712	0.00699	0.0068	0.00666	0.00661	0.0066	0.00661	0.00655	0.0065	0.00632	0.00619	0.00593	0.00562
1868.67	0.00893	0.00884	0.00906	0.0089	0.00873	0.00846	0.00826	0.00796	0.00783	0.0078	0.00763	0.00758	0.00755	0.00754	0.00751	0.00727	0.00713	0.00699	0.00682	0.00667	0.00662	0.00659	0.00661	0.00657	0.0065	0.00634	0.00619	0.00594	0.00562
1870.6	0.00893	0.00886	0.00906	0.00891	0.00874	0.00848	0.00827	0.00797	0.00783	0.00781	0.00763	0.00759	0.00756	0.00755	0.00753	0.00727	0.00713	0.00699	0.00684	0.00667	0.00662	0.00659	0.00663	0.00658	0.00652	0.00634	0.0062	0.00594	0.00564
1872.53	0.00894	0.00887	0.00906	0.00892	0.00874	0.00849	0.00828	0.00798	0.00783	0.00782	0.00763	0.00759	0.00756	0.00756	0.00753	0.00728	0.00714	0.007	0.00686	0.00668	0.00663	0.0066	0.00665	0.00659	0.00653	0.00634	0.00621	0.00595	0.00565
1874.46	0.00895	0.00888	0.00907	0.00894	0.00874	0.0085	0.00828	0.00799	0.00784	0.00783	0.00764	0.0076	0.00756	0.00756	0.00753	0.00729	0.00714	0.00701	0.00687	0.00669	0.00664	0.00661	0.00666	0.00659	0.00655	0.00634	0.00622	0.00595	0.00566
1876.39	0.00895	0.0089	0.00908	0.00895	0.00876	0.00851	0.00828	0.00799	0.00785	0.00783	0.00765	0.0076	0.00757	0.00756	0.00753	0.0073	0.00714	0.00702	0.00687	0.00671	0.00666	0.00663	0.00666	0.00659	0.00656	0.00635	0.00622	0.00595	0.00566
1878.31	0.00896	0.0089	0.00908	0.00896	0.00877	0.00851	0.00829	0.00801	0.00786	0.00784	0.00766	0.00761	0.00758	0.00756	0.00754	0.0073	0.00714	0.00703	0.00687	0.00673	0.00667	0.00664	0.00666	0.00659	0.00657	0.00637	0.00623	0.00596	0.00566
1880.24	0.00897	0.0089	0.00909	0.00896	0.00878	0.0085	0.0083	0.00802	0.00787	0.00785	0.00766	0.00762	0.00759	0.00757	0.00755	0.00731	0.00715	0.00704	0.00688	0.00673	0.00667	0.00664	0.00667	0.0066	0.00657	0.00638	0.00624	0.00596	0.00567
1882.17	0.00897	0.00891	0.00909	0.00897	0.00878	0.0085	0.00831	0.00802	0.00787	0.00786	0.00767	0.00763	0.0076	0.00759	0.00756	0.00731	0.00717	0.00704	0.00689	0.00673	0.00668	0.00664	0.00667	0.00661	0.00658	0.00639	0.00625	0.00595	0.00567
1884.1	0.00897	0.00891	0.0091	0.00898	0.00878	0.00851	0.00832	0.00803	0.00788	0.00787	0.00767	0.00763	0.00761	0.00759	0.00756	0.00732	0.00719	0.00705	0.0069	0.00673	0.00669	0.00664	0.00669	0.00662	0.00659	0.00641	0.00626	0.00595	0.00568
1886.03	0.00898	0.00892	0.00912	0.00898	0.00879	0.00852	0.00833	0.00804	0.00789	0.00788	0.00769	0.00764	0.00762	0.00759	0.00757	0.00733	0.00719	0.00706	0.00691	0.00674	0.00671	0.00665	0.0067	0.00662	0.0066	0.00642	0.00627	0.00597	0.00569
1887.96	0.00899	0.00893	0.00913	0.00899	0.0088	0.00854	0.00834	0.00805	0.0079	0.00788	0.0077	0.00764	0.00762	0.0076	0.00759	0.00734	0.0072	0.00707	0.00692	0.00676	0.00672	0.00666	0.00671	0.00664	0.00661	0.00643	0.00628	0.00599	0.0057
1889.88	0.009	0.00895	0.00914	0.00899	0.00881	0.00855	0.00835	0.00807	0.0079	0.00789	0.00771	0.00765	0.00763	0.00761	0.0076	0.00736	0.00721	0.00708	0.00692	0.00677	0.00673	0.00667	0.00672	0.00665	0.00662	0.00643	0.00629	0.00601	0.00571
1891.81	0.00901	0.00896	0.00915	0.009	0.00883	0.00856	0.00835	0.00809	0.00791	0.0079	0.00771	0.00766	0.00763	0.00762	0.00761	0.00737	0.00722	0.00709	0.00693	0.00677	0.00674	0.00668	0.00672	0.00666	0.00663	0.00643	0.0063	0.00602	0.00572
1893.74	0.00903	0.00897	0.00916	0.00901	0.00883	0.00857	0.00836	0.0081	0.00793	0.00791	0.00773	0.00768	0.00764	0.00764	0.00761	0.00737	0.00723	0.0071	0.00694	0.00679	0.00675	0.00669	0.00673	0.00667	0.00664	0.00645	0.00631	0.00602	0.00573
1895.67	0.00904	0.00898	0.00916	0.00902	0.00884	0.00858	0.00838	0.0081	0.00794	0.00792	0.00774	0.0077	0.00766	0.00765	0.00762	0.00738	0.00724	0.00711	0.00695	0.0068	0.00676	0.00671	0.00675	0.00668	0.00665	0.00647	0.00632	0.00603	0.00575
1897.6	0.00905	0.00898	0.00918	0.00904	0.00885	0.00859	0.00839	0.0081	0.00795	0.00794	0.00775	0.00771	0.00767	0.00766	0.00763	0.00739	0.00725	0.00712	0.00696	0.00681	0.00677	0.00672	0.00676	0.0067	0.00666	0.00648	0.00633	0.00604	0.00576
1899.53	0.00906	0.00899	0.00918	0.00904	0.00886	0.00861	0.0084	0.0081	0.00795	0.00795	0.00776	0.00771	0.00768	0.00766	0.00765	0.00739	0.00727	0.00713	0.00697	0.00682	0.00677	0.00673	0.00677	0.00671	0.00666	0.00648	0.00635	0.00606	0.00578
1901.46	0.00906	0.009	0.00919	0.00905	0.00886	0.00861	0.00841	0.00812	0.00796	0.00796	0.00777	0.00771	0.00769	0.00767	0.00766	0.0074	0.00728	0.00714	0.00698	0.00683	0.00678	0.00674	0.00678	0.00671	0.00666	0.00648	0.00636	0.00607	0.00579
1903.38	0.00907	0.00901	0.00919	0.00906	0.00887	0.00862	0.00842	0.00813	0.00796	0.00796	0.00778	0.00772	0.0077	0.00768	0.00767	0.00741	0.00729	0.00714	0.00698	0.00684	0.00679	0.00675	0.00678	0.00672	0.00667	0.00649	0.00636	0.00608	0.00579
1905.31	0.00907	0.00902	0.0092	0.00907	0.00888	0.00863	0.00843	0.00814	0.00797	0.00797	0.00779	0.00773	0.0077	0.00769	0.00768	0.00743	0.0073	0.00715	0.00699	0.00684	0.0068	0.00676	0.0068	0.00672	0.00668	0.0065	0.00637	0.00609	0.0058
1907.24	0.00908	0.00903	0.00921	0.00908	0.00889	0.00863	0.00843	0.00814	0.00798	0.00798	0.0078	0.00774	0.00771	0.0077	0.00769	0.00744	0.0073	0.00716	0.007	0.00685	0.0068	0.00676	0.0068	0.00673	0.00668	0.00651	0.00637	0.00609	0.00581
1909.17	0.00909	0.00903	0.00923	0.00909	0.0089	0.00864	0.00844	0.00815	0.00799	0.00799	0.0078	0.00775	0.00772	0.00771	0.0077	0.00745	0.00731	0.00717	0.00701	0.00686	0.00681	0.00677	0.00681	0.00674	0.00669	0.00652	0.00638	0.0061	0.00581
1911.1	0.0091	0.00904	0.00924	0.0091	0.00891	0.00865	0.00845	0.00815	0.008	0.008	0.00781	0.00776	0.00773	0.00772	0.00771	0.00747	0.00732	0.00718	0.00702	0.00686	0.00682	0.00678	0.00682	0.00675	0.00671	0.00653	0.00639	0.00611	0.00581
1913.03	0.0091	0.00904	0.00925	0.00911	0.00891	0.00866	0.00845	0.00815	0.00801	0.00801	0.00781	0.00777	0.00774	0.00772	0.00771	0.00748	0.00733	0.00718	0.00703	0.00687	0.00683	0.00679	0.00682	0.00676	0.00672	0.00653	0.0064	0.00612	0.00581
1914.95	0.00911	0.00904	0.00925	0.00911	0.00891	0.00866	0.00846	0.00815	0.00801	0.00801	0.00782	0.00777	0.00775	0.00772	0.00771	0.00749	0.00733	0.00719	0.00703	0.00687	0.00683	0.0068	0.00683	0.00676	0.00672	0.00654	0.0064	0.00612	0.00582
1916.88	0.00911	0.00905	0.00924	0.00911	0.00891	0.00866	0.00846	0.00815	0.00801	0.00801	0.00782	0.00777	0.00775	0.00773	0.00771	0.00749	0.00733	0.00719	0.00704	0.00687	0.00683	0.0068	0.00683	0.00676	0.00672	0.00654	0.00641	0.00613	0.00583
1918.81	0.00911	0.00905	0.00925	0.00911	0.00892	0.00866	0.00846	0.00815	0.00801	0.00802	0.00782	0.00778	0.00775	0.00773	0.00771	0.00749	0.00734	0.00719	0.00705	0.00687	0.00684	0.00679	0.00683	0.00677	0.00672	0.00655	0.00641	0.00612	0.00583
1920.74	0.00912	0.00906	0.00925	0.00911	0.00892	0.00866	0.00846	0.00816	0.00802	0.00802	0.00783	0.00778	0.00776	0.00774	0.00772	0.00749	0.00734	0.0072	0.00705	0.00688	0.00684	0.0068	0.00684	0.00677	0.00673	0.00656	0.00642	0.00612	0.00583
1922.67	0.00912	0.00906	0.00926	0.00912	0.00893	0.00867	0.00847	0.00817	0.00803	0.00803	0.00783	0.00778	0.00776	0.00775	0.00772	0.0075	0.00734	0.0072	0.00705	0.00688	0.00684	0.0068	0.00684	0.00678	0.00674	0.00656	0.00642	0.00613	0.00583
1924.6	0.00912	0.00905	0.00926	0.00912	0.00893	0.00868	0.00847	0.00818	0.00803	0.00803	0.00783	0.00778	0.00776	0.00776	0.00772	0.0075	0.00735	0.00721	0.00705	0.00689	0.00685	0.00681	0.00684	0.00678	0.00674	0.00656	0.00642	0.00614	0.00583
1926.52	0.00912	0.00906	0.00926	0.00912	0.00893	0.00868	0.00847	0.00818	0.00803	0.00803	0.00784	0.00778	0.00776	0.00776	0.00773	0.0075	0.00735	0.00722	0.00706	0.00689	0.00685	0.00682	0.00684	0.00678	0.00674	0.00655	0.00642	0.00614	0.00584
1928.45	0.00912	0.00906	0.00925	0.00912	0.00893	0.00868	0.00847	0.00818	0.00803	0.00803	0.00784	0.00778	0.00777	0.00775	0.00773	0.0075	0.00735	0.00722	0.00706	0.0069	0.00686	0.00682	0.00684	0.00678	0.00675	0.00655	0.00643	0.00615	0.00584
1930.38	0.00912	0.00906	0.00925	0.00912	0.00893	0.00868	0.00848	0.00818	0.00802	0.00803	0.00784	0.00779	0.00777	0.00775	0.00773	0.0075	0.00735	0.00721	0.00706	0.0069	0.00686	0.00682	0.00685	0.00679	0.00674	0.00656	0.00643	0.00615	0.00584
1932.31	0.00912	0.00905	0.00925	0.00912	0.00893	0.00868	0.00848	0.00818	0.00802	0.00803	0.00784	0.00779	0.00777	0.00774	0.00774	0.00749	0.00735	0.00722	0.00705	0.0069	0.00687	0.00682	0.00685	0.00679	0.00674	0.00656	0.00643	0.00615	0.00584
1934.24	0.00912	0.00905	0.00926	0.00913	0.00894	0.00868	0.00848	0.00818	0.00802	0.00803	0.00784	0.00779	0.00777	0.00775	0.00773	0.0075	0.00736	0.00722	0.00706	0.0069	0.00687	0.00682	0.00686	0.00679	0.00675	0.00657	0.00643	0.00616	0.00584
1936.17	0.00912	0.00905	0.00927	0.00913	0.00894	0.00868	0.00849	0.00819	0.00803	0.00803	0.00784	0.0078	0.00777	0.00776	0.00773	0.0075	0.00736	0.00722	0.00707	0.00691	0.00687	0.00682	0.00686	0.0068	0.00675	0.00658	0.00643	0.00616	0.00585
1938.1	0.00913	0.00906	0.00927	0.00913	0.00894	0.00868	0.00849	0.00819	0.00805	0.00804	0.00785	0.0078	0.00777	0.00776	0.00774	0.00751	0.00735	0.00723	0.00707	0.00691	0.00687	0.00683	0.00686	0.0068	0.00676	0.00658	0.00643	0.00616	0.00585
1940.02	0.00913	0.00907	0.00927	0.00913	0.00894	0.00869	0.00849	0.0082	0.00805	0.00804	0.00785	0.00781	0.00777	0.00776	0.00774	0.00752	0.00736	0.00723	0.00707	0.00691	0.00688	0.00683	0.00686	0.0068	0.00676	0.00657	0.00644	0.00616	0.00586
1941.95	0.00914	0.00907	0.00928	0.00914	0.00896	0.0087	0.0085	0.0082	0.00806	0.00805	0.00786	0.00782	0.00778	0.00777	0.00775	0.00752	0.00737	0.00724	0.00708	0.00692	0.00688	0.00684	0.00687	0.00681	0.00677	0.00658	0.00645	0.00616	0.00586
1943.88	0.00914	0.00908	0.00929	0.00915	0.00897	0.0087	0.00851	0.00821	0.00807	0.00806	0.00787	0.00783	0.00779	0.00778	0.00776	0.00753	0.00739	0.00725	0.00709	0.00693	0.00689	0.00685	0.00689	0.00682	0.00677	0.00658	0.00646	0.00616	0.00587
1945.81	0.00915	0.00909	0.00929	0.00915	0.00897	0.00871	0.00852	0.00821	0.00807	0.00807	0.00788	0.00783	0.0078	0.00779	0.00777	0.00754	0.0074	0.00725	0.0071	0.00694	0.0069	0.00686	0.0069	0.00682	0.00678	0.00659	0.00647	0.00617	0.00587
1947.74	0.00916	0.0091	0.0093	0.00916	0.00896	0.00872	0.00852	0.00822	0.00807	0.00808	0.00789	0.00784	0.0078	0.0078	0.00779	0.00755	0.0074	0.00726	0.00711	0.00694	0.0069	0.00686	0.00691	0.00683	0.00678	0.0066	0.00647	0.00617	0.00587
1949.67	0.00916	0.0091	0.0093	0.00916	0.00897	0.00873	0.00853	0.00822	0.00807	0.00808	0.0079	0.00785	0.00781	0.0078	0.00779	0.00755	0.0074	0.00727	0.00712	0.00694	0.00691	0.00687	0.00692	0.00684	0.00679	0.00661	0.00648	0.00618	0.00587
1951.59	0.00917	0.00911	0.0093	0.00917	0.00898	0.00874	0.00854	0.00824	0.00808	0.00809	0.0079	0.00785	0.00782	0.00781	0.00779	0.00756	0.00741	0.00727	0.00712	0.00695	0.00692	0.00687	0.00692	0.00685	0.00679	0.00662	0.00648	0.00619	0.00588
1953.52	0.00918	0.00911	0.00931	0.00918	0.00899	0.00874	0.00855	0.00824	0.00808	0.0081	0.0079	0.00785	0.00783	0.00781	0.00779	0.00756	0.00742	0.00728	0.00712	0.00696	0.00693	0.00688	0.00692	0.00685	0.0068	0.00662	0.00648	0.00619	0.00589
1955.45	0.00918	0.00912	0.00932	0.00918	0.009	0.00874	0.00855	0.00825	0.00809	0.0081	0.0079	0.00785	0.00784	0.00782	0.0078	0.00757	0.00742	0.00728	0.00712	0.00696	0.00693	0.00688	0.00692	0.00686	0.0068	0.00662	0.00648	0.00619	0.00589
1957.38	0.00919	0.00913	0.00933	0.00919	0.009	0.00875	0.00856	0.00825	0.00811	0.00811	0.0079	0.00786	0.00784	0.00782	0.0078	0.00757	0.00742	0.00729	0.00713	0.00697	0.00692	0.00688	0.00692	0.00687	0.00681	0.00663	0.00648	0.0062	0.00589
1959.31	0.0092	0.00914	0.00934	0.00919	0.00901	0.00877	0.00857	0.00825	0.00812	0.00813	0.00792	0.00788	0.00786	0.00783	0.00782	0.00758	0.00743	0.0073	0.00714	0.00698	0.00693	0.00689	0.00693	0.00688	0.00683	0.00664	0.00649	0.0062	0.00589
1961.24	0.00921	0.00915	0.00936	0.0092	0.00903	0.00878	0.00858	0.00827	0.00813	0.00814	0.00794	0.00789	0.00787	0.00784	0.00783	0.00759	0.00744	0.00731	0.00715	0.00699	0.00695	0.0069	0.00694	0.00689	0.00684	0.00665	0.0065	0.00621	0.00588
1963.17	0.00923	0.00916	0.00937	0.00922	0.00905	0.00879	0.00859	0.00829	0.00813	0.00814	0.00795	0.00791	0.00789	0.00785	0.00784	0.0076	0.00746	0.00732	0.00716	0.007	0.00696	0.00691	0.00695	0.0069	0.00685	0.00665	0.00651	0.00622	0.00588
1965.09	0.00924	0.00918	0.00937	0.00924	0.00907	0.0088	0.0086	0.0083	0.00814	0.00814	0.00796	0.00792	0.0079	0.00786	0.00785	0.00761	0.00747	0.00734	0.00716	0.00701	0.00696	0.00693	0.00695	0.0069	0.00686	0.00667	0.00652	0.00623	0.00589
1967.02	0.00925	0.00919	0.00937	0.00926	0.00908	0.00881	0.00862	0.00832	0.00815	0.00816	0.00797	0.00793	0.00791	0.00788	0.00787	0.00762	0.00749	0.00735	0.00717	0.00701	0.00698	0.00694	0.00697	0.00691	0.00686	0.00668	0.00652	0.00624	0.00589
1968.95	0.00925	0.00921	0.00937	0.00927	0.00909	0.00882	0.00863	0.00832	0.00817	0.00817	0.00798	0.00794	0.00792	0.00789	0.00788	0.00763	0.00751	0.00736	0.00718	0.00701	0.00699	0.00695	0.00698	0.00691	0.00686	0.00668	0.00653	0.00624	0.00589
1970.88	0.00925	0.00921	0.00938	0.00928	0.00909	0.00883	0.00864	0.00833	0.00818	0.00818	0.00798	0.00795	0.00793	0.00789	0.00789	0.00765	0.00752	0.00736	0.0072	0.00702	0.00699	0.00695	0.00699	0.00691	0.00686	0.00668	0.00653	0.00624	0.00589
1972.81	0.00926	0.00922	0.0094	0.00929	0.00909	0.00883	0.00864	0.00833	0.00819	0.00819	0.00798	0.00795	0.00794	0.0079	0.0079	0.00766	0.00752	0.00736	0.00722	0.00703	0.00699	0.00695	0.00697	0.00691	0.00686	0.00668	0.00652	0.00622	0.00588
1974.74	0.00928	0.00922	0.00941	0.0093	0.0091	0.00885	0.00864	0.00834	0.00819	0.0082	0.00799	0.00796	0.00794	0.00791	0.0079	0.00767	0.00751	0.00737	0.00723	0.00704	0.00699	0.00695	0.00697	0.00691	0.00686	0.00668	0.00652	0.00621	0.00586
1976.66	0.00929	0.00923	0.00942	0.00931	0.00911	0.00885	0.00865	0.00835	0.0082	0.0082	0.00801	0.00797	0.00794	0.00792	0.00791	0.00767	0.00751	0.00737	0.00723	0.00704	0.00699	0.00695	0.00697	0.00691	0.00685	0.00668	0.00652	0.0062	0.00585
1978.59	0.0093	0.00924	0.00942	0.00932	0.00912	0.00886	0.00867	0.00835	0.0082	0.00821	0.00803	0.00798	0.00794	0.00793	0.00791	0.00767	0.00751	0.00738	0.00722	0.00704	0.007	0.00695	0.00698	0.0069	0.00686	0.00667	0.00652	0.00619	0.00584
1980.52	0.0093	0.00925	0.00944	0.00931	0.00912	0.00887	0.00867	0.00835	0.00821	0.00823	0.00803	0.00798	0.00794	0.00793	0.00792	0.00767	0.00752	0.00737	0.00723	0.00704	0.007	0.00695	0.00698	0.0069	0.00686	0.00666	0.00651	0.00619	0.00584
1982.45	0.0093	0.00926	0.00946	0.00931	0.00913	0.00887	0.00867	0.00836	0.00821	0.00824	0.00802	0.00798	0.00794	0.00793	0.00792	0.00768	0.00752	0.00737	0.00723	0.00704	0.007	0.00694	0.00698	0.0069	0.00686	0.00665	0.0065	0.00619	0.00583
1984.38	0.0093	0.00927	0.00947	0.00931	0.00913	0.00887	0.00868	0.00836	0.00822	0.00824	0.00801	0.00798	0.00794	0.00794	0.00792	0.00768	0.00752	0.00737	0.00721	0.00704	0.00699	0.00693	0.00697	0.0069	0.00685	0.00665	0.00649	0.00618	0.00583
1986.31	0.0093	0.00927	0.00947	0.00932	0.00913	0.00887	0.00868	0.00837	0.00822	0.00825	0.008	0.00798	0.00795	0.00794	0.00792	0.00767	0.00752	0.00737	0.00718	0.00704	0.00698	0.00694	0.00696	0.0069	0.00685	0.00664	0.00649	0.00617	0.00583
1988.24	0.00931	0.00928	0.00946	0.00933	0.00913	0.00888	0.00869	0.00838	0.00823	0.00826	0.00802	0.00799	0.00795	0.00794	0.00792	0.00767	0.00752	0.00737	0.00716	0.00703	0.00697	0.00694	0.00696	0.00689	0.00685	0.00663	0.0065	0.00617	0.00583
1990.16	0.00932	0.00929	0.00945	0.00934	0.00914	0.00888	0.0087	0.00839	0.00823	0.00826	0.00804	0.00799	0.00796	0.00795	0.00793	0.00768	0.00752	0.00737	0.00714	0.00702	0.00697	0.00693	0.00696	0.00688	0.00685	0.00663	0.00651	0.00617	0.00584
1992.09	0.00933	0.00929	0.00946	0.00933	0.00915	0.00888	0.00871	0.0084	0.00824	0.00827	0.00806	0.008	0.00797	0.00795	0.00793	0.00769	0.00753	0.00738	0.00714	0.00702	0.00698	0.00694	0.00696	0.00688	0.00686	0.00664	0.00653	0.00618	0.00585
1994.02	0.00935	0.00929	0.00948	0.00934	0.00916	0.00889	0.00871	0.0084	0.00825	0.00827	0.00806	0.008	0.00797	0.00795	0.00794	0.0077	0.00754	0.00739	0.00718	0.00704	0.007	0.00697	0.00697	0.00689	0.00688	0.00665	0.00653	0.0062	0.00586
1995.95	0.00936	0.00928	0.00948	0.00935	0.00917	0.00889	0.00871	0.00841	0.00825	0.00826	0.00807	0.008	0.00796	0.00795	0.00795	0.00771	0.00754	0.0074	0.00722	0.00705	0.00702	0.00699	0.00699	0.00689	0.00691	0.00666	0.00654	0.00622	0.00587
1997.88	0.00936	0.00926	0.00949	0.00937	0.00917	0.00891	0.00871	0.00841	0.00826	0.00825	0.00807	0.00801	0.00796	0.00796	0.00796	0.00771	0.00755	0.0074	0.00724	0.00706	0.00704	0.007	0.00701	0.00692	0.00693	0.00668	0.00655	0.00623	0.00589
1999.81	0.00936	0.00926	0.00949	0.00937	0.00917	0.00892	0.00872	0.00841	0.00826	0.00825	0.00808	0.00802	0.00798	0.00796	0.00797	0.00772	0.00756	0.00741	0.00726	0.00708	0.00705	0.007	0.00703	0.00695	0.00694	0.00671	0.00656	0.00625	0.00591
2001.73	0.00937	0.00928	0.0095	0.00938	0.00917	0.00892	0.00874	0.00842	0.00827	0.00826	0.00809	0.00804	0.00801	0.00797	0.00798	0.00772	0.00757	0.00742	0.00727	0.0071	0.00706	0.00701	0.00705	0.00697	0.00694	0.00674	0.00658	0.00628	0.00593
2003.66	0.00937	0.0093	0.00951	0.00938	0.00916	0.00894	0.00875	0.00843	0.00828	0.00828	0.0081	0.00807	0.00804	0.00798	0.00798	0.00773	0.00758	0.00744	0.00726	0.00711	0.00706	0.00701	0.00707	0.00699	0.00695	0.00676	0.0066	0.0063	0.00595
2005.59	0.00938	0.00932	0.00952	0.00939	0.00917	0.00894	0.00875	0.00844	0.00829	0.0083	0.00811	0.00808	0.00804	0.008	0.00799	0.00774	0.0076	0.00746	0.00725	0.00712	0.00708	0.00703	0.00708	0.007	0.00695	0.00677	0.00663	0.00632	0.00597
2007.52	0.00938	0.00933	0.00953	0.00939	0.00918	0.00894	0.00875	0.00845	0.0083	0.00831	0.00811	0.00807	0.00804	0.00801	0.008	0.00775	0.00761	0.00747	0.00726	0.00713	0.00708	0.00704	0.00709	0.00701	0.00696	0.00678	0.00666	0.00634	0.00599
2009.45	0.0094	0.00934	0.00954	0.00939	0.0092	0.00893	0.00875	0.00846	0.00831	0.00831	0.00811	0.00807	0.00805	0.00803	0.00801	0.00777	0.00762	0.00748	0.0073	0.00714	0.00709	0.00705	0.00709	0.00702	0.00697	0.00679	0.00667	0.00636	0.00601
2011.38	0.00941	0.00934	0.00955	0.0094	0.00922	0.00894	0.00877	0.00847	0.00832	0.00832	0.00811	0.00807	0.00806	0.00804	0.00802	0.00778	0.00764	0.00749	0.00734	0.00715	0.0071	0.00706	0.00709	0.00704	0.00699	0.0068	0.00667	0.00638	0.00602
2013.31	0.00941	0.00934	0.00956	0.00941	0.00923	0.00896	0.00878	0.00847	0.00833	0.00832	0.00812	0.00808	0.00807	0.00805	0.00803	0.00779	0.00765	0.0075	0.00736	0.00716	0.00712	0.00706	0.0071	0.00705	0.00701	0.00682	0.00667	0.00639	0.00605
2015.23	0.00941	0.00934	0.00957	0.00941	0.00922	0.00897	0.00878	0.00848	0.00834	0.00833	0.00812	0.00809	0.00807	0.00806	0.00804	0.00779	0.00765	0.00751	0.00736	0.00717	0.00714	0.00707	0.00712	0.00706	0.00701	0.00683	0.00669	0.00639	0.00607
2017.16	0.00941	0.00934	0.00956	0.00942	0.00923	0.00899	0.00879	0.00848	0.00834	0.00834	0.00814	0.0081	0.00808	0.00806	0.00804	0.0078	0.00766	0.00753	0.00735	0.00718	0.00715	0.00709	0.00713	0.00707	0.00702	0.00685	0.00671	0.0064	0.00609
2019.09	0.00941	0.00935	0.00956	0.00942	0.00924	0.00901	0.00879	0.00848	0.00834	0.00834	0.00815	0.00811	0.00808	0.00806	0.00805	0.00781	0.00766	0.00753	0.00734	0.00719	0.00715	0.0071	0.00715	0.00707	0.00703	0.00685	0.00673	0.0064	0.0061
2021.02	0.00942	0.00936	0.00956	0.00943	0.00925	0.00901	0.00881	0.00849	0.00834	0.00835	0.00816	0.00811	0.00809	0.00807	0.00806	0.00782	0.00766	0.00753	0.00735	0.00721	0.00716	0.00711	0.00716	0.00708	0.00705	0.00685	0.00673	0.00641	0.00612
2022.95	0.00942	0.00936	0.00957	0.00943	0.00925	0.009	0.00883	0.00849	0.00835	0.00836	0.00817	0.00812	0.0081	0.00808	0.00807	0.00783	0.00767	0.00754	0.00737	0.00722	0.00717	0.00712	0.00717	0.00709	0.00707	0.00687	0.00674	0.00643	0.00614
2024.88	0.00944	0.00937	0.00958	0.00944	0.00926	0.009	0.00883	0.0085	0.00836	0.00836	0.00817	0.00813	0.00811	0.00809	0.00807	0.00784	0.00769	0.00755	0.00739	0.00723	0.00718	0.00714	0.00718	0.00711	0.00708	0.00689	0.00675	0.00646	0.00615
2026.8	0.00944	0.00937	0.00959	0.00945	0.00927	0.00902	0.00881	0.0085	0.00836	0.00836	0.00817	0.00814	0.00811	0.0081	0.00808	0.00784	0.0077	0.00757	0.0074	0.00724	0.00719	0.00715	0.00719	0.00712	0.00708	0.0069	0.00677	0.00649	0.00617
2028.73	0.00945	0.00938	0.00959	0.00946	0.00927	0.00902	0.00881	0.00851	0.00836	0.00837	0.00818	0.00814	0.00812	0.00811	0.0081	0.00785	0.00771	0.00759	0.0074	0.00725	0.00721	0.00716	0.0072	0.00713	0.00709	0.00691	0.00678	0.0065	0.00619
2030.66	0.00945	0.00939	0.00959	0.00946	0.00927	0.00902	0.00883	0.00852	0.00837	0.00838	0.00819	0.00815	0.00813	0.00811	0.0081	0.00786	0.00771	0.00759	0.00741	0.00726	0.00721	0.00717	0.00721	0.00714	0.0071	0.00692	0.00679	0.0065	0.00621
2032.59	0.00945	0.00939	0.0096	0.00946	0.00927	0.00902	0.00884	0.00852	0.00837	0.00839	0.00819	0.00815	0.00813	0.00812	0.0081	0.00787	0.00772	0.00758	0.00742	0.00727	0.00722	0.00717	0.00722	0.00716	0.00711	0.00693	0.00679	0.00651	0.00621
2034.52	0.00945	0.00938	0.0096	0.00946	0.00927	0.00903	0.00883	0.00852	0.00837	0.00839	0.00819	0.00815	0.00813	0.00812	0.00809	0.00787	0.00772	0.00758	0.00742	0.00727	0.00722	0.00718	0.00723	0.00716	0.00711	0.00694	0.0068	0.00652	0.00622
2036.45	0.00945	0.00938	0.00959	0.00946	0.00927	0.00903	0.00883	0.00852	0.00836	0.00839	0.00819	0.00815	0.00813	0.00811	0.00809	0.00787	0.00773	0.00759	0.00743	0.00727	0.00722	0.00718	0.00724	0.00717	0.00712	0.00694	0.00681	0.00653	0.00623
2038.38	0.00945	0.00938	0.00959	0.00945	0.00927	0.00902	0.00883	0.00852	0.00836	0.00839	0.00819	0.00815	0.00813	0.00811	0.00809	0.00787	0.00773	0.0076	0.00743	0.00727	0.00723	0.00719	0.00724	0.00717	0.00712	0.00695	0.00681	0.00652	0.00624
2040.3	0.00944	0.00938	0.00959	0.00945	0.00927	0.00902	0.00883	0.00852	0.00837	0.00839	0.00819	0.00815	0.00813	0.00812	0.0081	0.00787	0.00773	0.00759	0.00743	0.00727	0.00722	0.00719	0.00724	0.00717	0.00712	0.00695	0.00681	0.00652	0.00623
2042.23	0.00944	0.00938	0.00959	0.00945	0.00927	0.00902	0.00883	0.00852	0.00837	0.00839	0.00819	0.00815	0.00813	0.00812	0.0081	0.00787	0.00773	0.00759	0.00744	0.00727	0.00722	0.00719	0.00723	0.00717	0.00712	0.00695	0.00681	0.00653	0.00623
2044.16	0.00944	0.00938	0.00959	0.00944	0.00926	0.00903	0.00883	0.00852	0.00837	0.00839	0.00819	0.00815	0.00813	0.00812	0.0081	0.00788	0.00773	0.00759	0.00745	0.00727	0.00723	0.00719	0.00723	0.00717	0.00712	0.00695	0.00681	0.00653	0.00624
2046.09	0.00944	0.00938	0.00959	0.00945	0.00926	0.00903	0.00882	0.00852	0.00837	0.00839	0.00819	0.00815	0.00813	0.00811	0.0081	0.00788	0.00773	0.0076	0.00745	0.00727	0.00723	0.0072	0.00724	0.00717	0.00712	0.00695	0.00682	0.00654	0.00625
2048.02	0.00944	0.00938	0.00959	0.00945	0.00927	0.00903	0.00883	0.00853	0.00838	0.00839	0.0082	0.00816	0.00813	0.00811	0.0081	0.00788	0.00774	0.0076	0.00745	0.00727	0.00723	0.0072	0.00724	0.00717	0.00712	0.00695	0.00682	0.00655	0.00625
2049.95	0.00945	0.00939	0.0096	0.00946	0.00927	0.00903	0.00883	0.00854	0.00838	0.0084	0.0082	0.00816	0.00813	0.00812	0.00809	0.00788	0.00774	0.0076	0.00745	0.00728	0.00724	0.0072	0.00725	0.00718	0.00713	0.00696	0.00683	0.00655	0.00625
2051.87	0.00945	0.00939	0.0096	0.00946	0.00928	0.00904	0.00883	0.00855	0.00838	0.0084	0.00821	0.00816	0.00814	0.00813	0.0081	0.00789	0.00775	0.00761	0.00745	0.00728	0.00725	0.00721	0.00726	0.00718	0.00714	0.00696	0.00684	0.00656	0.00626
2053.8	0.00946	0.00939	0.00961	0.00947	0.00928	0.00904	0.00883	0.00855	0.00839	0.00841	0.00821	0.00816	0.00815	0.00813	0.00811	0.00789	0.00775	0.00761	0.00745	0.00729	0.00726	0.00722	0.00726	0.0072	0.00715	0.00697	0.00684	0.00656	0.00626
2055.73	0.00946	0.00939	0.00961	0.00947	0.00928	0.00904	0.00884	0.00854	0.00839	0.0084	0.00821	0.00817	0.00815	0.00813	0.00813	0.0079	0.00775	0.00762	0.00745	0.0073	0.00726	0.00722	0.00727	0.0072	0.00715	0.00698	0.00685	0.00657	0.00626
2057.66	0.00946	0.00939	0.00961	0.00947	0.00928	0.00904	0.00885	0.00853	0.00839	0.0084	0.00822	0.00817	0.00815	0.00813	0.00814	0.00791	0.00775	0.00762	0.00746	0.0073	0.00726	0.00722	0.00727	0.00721	0.00716	0.00698	0.00686	0.00657	0.00627
2059.59	0.00946	0.00939	0.00961	0.00947	0.00929	0.00905	0.00885	0.00853	0.00839	0.0084	0.00822	0.00818	0.00815	0.00814	0.00814	0.00791	0.00776	0.00762	0.00746	0.0073	0.00726	0.00723	0.00727	0.00721	0.00717	0.00698	0.00686	0.00658	0.00629
2061.52	0.00946	0.00939	0.00961	0.00947	0.00929	0.00905	0.00886	0.00854	0.00839	0.0084	0.00822	0.00818	0.00816	0.00815	0.00814	0.00791	0.00777	0.00762	0.00746	0.00731	0.00726	0.00723	0.00728	0.00721	0.00717	0.00698	0.00686	0.00658	0.0063
2063.45	0.00946	0.0094	0.00961	0.00948	0.00929	0.00905	0.00886	0.00853	0.0084	0.00841	0.00822	0.00819	0.00817	0.00815	0.00814	0.0079	0.00777	0.00763	0.00747	0.00731	0.00727	0.00723	0.00728	0.00721	0.00717	0.00699	0.00686	0.00659	0.0063
2065.37	0.00947	0.0094	0.00961	0.00948	0.0093	0.00905	0.00886	0.00853	0.0084	0.00842	0.00822	0.00819	0.00817	0.00816	0.00814	0.0079	0.00778	0.00763	0.00748	0.00731	0.00727	0.00724	0.00729	0.00722	0.00717	0.00699	0.00687	0.00659	0.0063
2067.3	0.00947	0.0094	0.00962	0.00949	0.0093	0.00905	0.00886	0.00854	0.00841	0.00842	0.00823	0.00819	0.00818	0.00816	0.00815	0.00791	0.00778	0.00764	0.00749	0.00731	0.00728	0.00724	0.00729	0.00723	0.00717	0.007	0.00687	0.0066	0.0063
2069.23	0.00947	0.0094	0.00962	0.00949	0.0093	0.00906	0.00887	0.00855	0.00841	0.00842	0.00824	0.00819	0.00818	0.00816	0.00815	0.00791	0.00778	0.00765	0.00749	0.00731	0.00729	0.00724	0.00729	0.00723	0.00718	0.00701	0.00688	0.0066	0.00631
2071.16	0.00947	0.0094	0.00962	0.00949	0.0093	0.00906	0.00888	0.00856	0.00842	0.00842	0.00824	0.00819	0.00818	0.00816	0.00814	0.00792	0.00779	0.00765	0.00749	0.00731	0.00729	0.00724	0.0073	0.00723	0.00718	0.00701	0.00688	0.0066	0.00632
2073.09	0.00947	0.0094	0.00962	0.00949	0.00931	0.00906	0.00888	0.00856	0.00842	0.00843	0.00824	0.0082	0.00818	0.00817	0.00814	0.00793	0.00779	0.00765	0.00749	0.00732	0.00729	0.00724	0.0073	0.00723	0.00719	0.00701	0.00688	0.00661	0.00632
2075.02	0.00947	0.00941	0.00962	0.00949	0.00931	0.00906	0.00888	0.00856	0.00842	0.00843	0.00825	0.0082	0.00818	0.00817	0.00815	0.00795	0.00779	0.00766	0.00749	0.00732	0.00729	0.00725	0.0073	0.00723	0.00719	0.00701	0.00688	0.00661	0.00632
2076.94	0.00947	0.00941	0.00962	0.00949	0.00931	0.00906	0.00888	0.00856	0.00842	0.00844	0.00825	0.0082	0.00818	0.00817	0.00815	0.00796	0.00779	0.00766	0.0075	0.00733	0.00729	0.00726	0.0073	0.00724	0.0072	0.00702	0.00689	0.00661	0.00632
2078.87	0.00947	0.00941	0.00962	0.00949	0.00932	0.00906	0.00887	0.00857	0.00842	0.00844	0.00824	0.0082	0.00818	0.00817	0.00816	0.00795	0.0078	0.00766	0.00751	0.00733	0.0073	0.00726	0.0073	0.00724	0.0072	0.00702	0.00689	0.00662	0.00633
2080.8	0.00948	0.00941	0.00962	0.00949	0.00932	0.00906	0.00887	0.00858	0.00842	0.00844	0.00825	0.00821	0.00819	0.00817	0.00816	0.00794	0.0078	0.00766	0.00751	0.00733	0.0073	0.00727	0.00731	0.00725	0.0072	0.00703	0.0069	0.00662	0.00633
2082.73	0.00948	0.00941	0.00963	0.0095	0.00932	0.00907	0.00888	0.00858	0.00842	0.00844	0.00825	0.00821	0.00819	0.00818	0.00816	0.00793	0.0078	0.00766	0.00751	0.00734	0.00731	0.00727	0.00731	0.00725	0.00721	0.00703	0.0069	0.00662	0.00634
2084.66	0.00949	0.00941	0.00963	0.0095	0.00932	0.00908	0.00889	0.00858	0.00843	0.00845	0.00825	0.00821	0.0082	0.00819	0.00817	0.00793	0.0078	0.00767	0.00751	0.00735	0.00731	0.00728	0.00732	0.00725	0.00721	0.00703	0.0069	0.00663	0.00634
2086.59	0.00949	0.00942	0.00964	0.00951	0.00932	0.00908	0.00889	0.00858	0.00843	0.00845	0.00826	0.00822	0.0082	0.00819	0.00818	0.00793	0.00781	0.00767	0.00752	0.00735	0.00731	0.00728	0.00733	0.00726	0.00722	0.00704	0.00691	0.00664	0.00635
2088.51	0.00949	0.00943	0.00964	0.00951	0.00933	0.00908	0.0089	0.00859	0.00844	0.00845	0.00826	0.00822	0.00821	0.0082	0.00819	0.00795	0.00782	0.00768	0.00753	0.00736	0.00732	0.00729	0.00733	0.00727	0.00722	0.00704	0.00692	0.00664	0.00636
2090.44	0.00949	0.00943	0.00965	0.00952	0.00933	0.00909	0.00891	0.0086	0.00844	0.00846	0.00827	0.00823	0.00821	0.0082	0.00819	0.00796	0.00783	0.00769	0.00754	0.00736	0.00733	0.00729	0.00734	0.00727	0.00723	0.00705	0.00693	0.00665	0.00636
2092.37	0.0095	0.00944	0.00965	0.00952	0.00934	0.00909	0.00891	0.0086	0.00845	0.00847	0.00827	0.00824	0.00822	0.00821	0.0082	0.00796	0.00783	0.0077	0.00754	0.00737	0.00734	0.0073	0.00735	0.00728	0.00724	0.00706	0.00694	0.00666	0.00637
2094.3	0.00951	0.00944	0.00966	0.00953	0.00935	0.0091	0.00891	0.00861	0.00845	0.00847	0.00828	0.00824	0.00822	0.00821	0.0082	0.00796	0.00783	0.00771	0.00755	0.00738	0.00734	0.0073	0.00735	0.00729	0.00724	0.00707	0.00694	0.00667	0.00638
2096.23	0.00951	0.00944	0.00966	0.00953	0.00935	0.0091	0.00891	0.00861	0.00846	0.00847	0.00828	0.00825	0.00823	0.00822	0.00821	0.00797	0.00784	0.00771	0.00755	0.00738	0.00735	0.00731	0.00736	0.0073	0.00725	0.00707	0.00695	0.00667	0.00638
2098.16	0.00951	0.00945	0.00967	0.00953	0.00935	0.00911	0.00892	0.00861	0.00846	0.00848	0.00829	0.00825	0.00823	0.00822	0.00821	0.00797	0.00784	0.00771	0.00755	0.00739	0.00735	0.00732	0.00736	0.0073	0.00725	0.00707	0.00695	0.00667	0.00639
2100.09	0.00951	0.00945	0.00967	0.00953	0.00935	0.00911	0.00892	0.00861	0.00846	0.00848	0.00829	0.00825	0.00823	0.00822	0.00821	0.00797	0.00785	0.00771	0.00755	0.00739	0.00735	0.00732	0.00736	0.0073	0.00725	0.00708	0.00695	0.00667	0.00639
2102.01	0.00951	0.00945	0.00967	0.00953	0.00935	0.00911	0.00892	0.00861	0.00847	0.00848	0.00829	0.00826	0.00823	0.00822	0.00821	0.00798	0.00786	0.00771	0.00755	0.00739	0.00736	0.00732	0.00737	0.0073	0.00726	0.00708	0.00696	0.00667	0.00639
2103.94	0.00951	0.00945	0.00967	0.00953	0.00935	0.00912	0.00892	0.00862	0.00847	0.00849	0.00829	0.00826	0.00823	0.00822	0.00822	0.00798	0.00786	0.00772	0.00756	0.00739	0.00736	0.00732	0.00737	0.00731	0.00726	0.00708	0.00696	0.00668	0.00639
2105.87	0.00952	0.00946	0.00967	0.00953	0.00936	0.00912	0.00892	0.00862	0.00847	0.00849	0.0083	0.00826	0.00824	0.00823	0.00822	0.00798	0.00786	0.00772	0.00756	0.0074	0.00736	0.00732	0.00737	0.00731	0.00726	0.00709	0.00696	0.00668	0.0064
2107.8	0.00952	0.00946	0.00968	0.00954	0.00936	0.00912	0.00893	0.00862	0.00848	0.0085	0.0083	0.00826	0.00824	0.00823	0.00822	0.00799	0.00786	0.00772	0.00757	0.0074	0.00737	0.00733	0.00738	0.00732	0.00727	0.00709	0.00697	0.00669	0.0064
2109.73	0.00952	0.00946	0.00968	0.00954	0.00937	0.00913	0.00893	0.00863	0.00847	0.0085	0.0083	0.00827	0.00825	0.00824	0.00822	0.008	0.00787	0.00773	0.00757	0.00741	0.00737	0.00734	0.00738	0.00732	0.00727	0.00709	0.00697	0.0067	0.00641
2111.66	0.00952	0.00946	0.00968	0.00955	0.00937	0.00913	0.00894	0.00863	0.00847	0.0085	0.00831	0.00827	0.00826	0.00824	0.00823	0.00801	0.00787	0.00773	0.00758	0.00741	0.00737	0.00734	0.00739	0.00732	0.00728	0.0071	0.00697	0.0067	0.00641
2113.58	0.00952	0.00945	0.00968	0.00955	0.00937	0.00913	0.00894	0.00863	0.00847	0.0085	0.00831	0.00827	0.00826	0.00824	0.00823	0.00801	0.00787	0.00774	0.00758	0.00742	0.00738	0.00734	0.0074	0.00733	0.00728	0.0071	0.00697	0.00671	0.00642
2115.51	0.00952	0.00946	0.00968	0.00955	0.00937	0.00913	0.00894	0.00863	0.00846	0.0085	0.00832	0.00828	0.00826	0.00824	0.00823	0.00801	0.00788	0.00774	0.00759	0.00742	0.00738	0.00734	0.0074	0.00733	0.00728	0.00711	0.00698	0.00671	0.00642
2117.44	0.00952	0.00946	0.00968	0.00954	0.00937	0.00913	0.00893	0.00863	0.00846	0.0085	0.00832	0.00828	0.00826	0.00825	0.00823	0.00801	0.00788	0.00774	0.00759	0.00742	0.00738	0.00734	0.0074	0.00733	0.00728	0.00711	0.00699	0.00671	0.00642
2119.37	0.00952	0.00946	0.00967	0.00954	0.00936	0.00912	0.00893	0.00863	0.00846	0.0085	0.00832	0.00828	0.00826	0.00825	0.00824	0.00802	0.00788	0.00774	0.00759	0.00742	0.00738	0.00735	0.0074	0.00733	0.00728	0.00711	0.00699	0.00671	0.00643
2121.3	0.00952	0.00946	0.00967	0.00954	0.00936	0.00913	0.00893	0.00863	0.00847	0.0085	0.00832	0.00828	0.00826	0.00825	0.00824	0.00802	0.00788	0.00774	0.00759	0.00742	0.00738	0.00735	0.0074	0.00733	0.00729	0.00711	0.00699	0.00671	0.00643
2123.23	0.00952	0.00946	0.00968	0.00954	0.00936	0.00913	0.00894	0.00864	0.00849	0.00851	0.00832	0.00828	0.00826	0.00825	0.00824	0.00802	0.00788	0.00775	0.00759	0.00743	0.00739	0.00735	0.0074	0.00734	0.00729	0.00712	0.00699	0.00672	0.00643
2125.16	0.00951	0.00945	0.00968	0.00954	0.00936	0.00913	0.00894	0.00864	0.00849	0.00851	0.00832	0.00828	0.00826	0.00825	0.00824	0.00802	0.00789	0.00775	0.00759	0.00743	0.00739	0.00736	0.0074	0.00734	0.0073	0.00712	0.00699	0.00672	0.00644
2127.08	0.00952	0.00945	0.00968	0.00954	0.00937	0.00913	0.00894	0.00864	0.00848	0.00851	0.00832	0.00828	0.00827	0.00825	0.00824	0.00802	0.00789	0.00775	0.0076	0.00743	0.00739	0.00736	0.00741	0.00734	0.0073	0.00713	0.00699	0.00672	0.00644
2129.01	0.00952	0.00945	0.00968	0.00954	0.00937	0.00913	0.00895	0.00863	0.00847	0.00851	0.00832	0.00828	0.00827	0.00826	0.00825	0.00802	0.00788	0.00775	0.0076	0.00743	0.00739	0.00736	0.00741	0.00734	0.0073	0.00713	0.007	0.00673	0.00645
2130.94	0.00952	0.00945	0.00967	0.00953	0.00937	0.00913	0.00894	0.00863	0.00847	0.00851	0.00832	0.00828	0.00827	0.00825	0.00825	0.00802	0.00789	0.00775	0.0076	0.00743	0.0074	0.00736	0.00741	0.00734	0.0073	0.00713	0.007	0.00673	0.00645
2132.87	0.00952	0.00945	0.00967	0.00954	0.00937	0.00913	0.00894	0.00863	0.00847	0.00851	0.00831	0.00828	0.00826	0.00825	0.00825	0.00802	0.00788	0.00775	0.00759	0.00743	0.0074	0.00736	0.00741	0.00734	0.0073	0.00713	0.007	0.00673	0.00645
2134.8	0.00952	0.00945	0.00967	0.00954	0.00937	0.00913	0.00894	0.00863	0.00848	0.00851	0.00832	0.00828	0.00827	0.00825	0.00825	0.00803	0.00788	0.00775	0.0076	0.00743	0.0074	0.00736	0.00741	0.00735	0.0073	0.00713	0.007	0.00674	0.00645
2136.73	0.00952	0.00945	0.00968	0.00954	0.00937	0.00913	0.00894	0.00864	0.00849	0.00851	0.00832	0.00829	0.00827	0.00826	0.00825	0.00803	0.00788	0.00776	0.0076	0.00744	0.00741	0.00737	0.00742	0.00735	0.00731	0.00714	0.00701	0.00674	0.00646
2138.65	0.00953	0.00946	0.00968	0.00955	0.00938	0.00914	0.00895	0.00864	0.0085	0.00852	0.00833	0.0083	0.00828	0.00827	0.00825	0.00803	0.00788	0.00776	0.00761	0.00744	0.00741	0.00737	0.00743	0.00736	0.00731	0.00714	0.00702	0.00675	0.00646
2140.58	0.00953	0.00946	0.00969	0.00956	0.00938	0.00914	0.00896	0.00864	0.0085	0.00853	0.00834	0.0083	0.00828	0.00827	0.00826	0.00804	0.0079	0.00777	0.00761	0.00745	0.00742	0.00738	0.00743	0.00736	0.00732	0.00715	0.00702	0.00675	0.00647
2142.51	0.00953	0.00946	0.00969	0.00956	0.00938	0.00914	0.00896	0.00865	0.00851	0.00854	0.00834	0.00831	0.00829	0.00828	0.00826	0.00805	0.00791	0.00777	0.00761	0.00745	0.00742	0.00739	0.00744	0.00737	0.00732	0.00716	0.00703	0.00676	0.00647
2144.44	0.00953	0.00947	0.0097	0.00956	0.00938	0.00915	0.00897	0.00865	0.00851	0.00854	0.00834	0.00831	0.00829	0.00828	0.00827	0.00805	0.00792	0.00778	0.00762	0.00746	0.00743	0.00739	0.00744	0.00737	0.00733	0.00716	0.00703	0.00677	0.00648
2146.37	0.00954	0.00947	0.0097	0.00956	0.00939	0.00915	0.00897	0.00866	0.00851	0.00854	0.00835	0.00831	0.00829	0.00829	0.00827	0.00806	0.00792	0.00778	0.00763	0.00746	0.00743	0.00739	0.00745	0.00738	0.00733	0.00716	0.00703	0.00677	0.00648
2148.3	0.00954	0.00947	0.0097	0.00957	0.00939	0.00915	0.00897	0.00866	0.00851	0.00854	0.00835	0.00832	0.0083	0.00829	0.00828	0.00806	0.00791	0.00778	0.00764	0.00746	0.00743	0.0074	0.00745	0.00738	0.00734	0.00717	0.00704	0.00677	0.00648
2150.23	0.00954	0.00947	0.0097	0.00957	0.00939	0.00915	0.00897	0.00866	0.00851	0.00854	0.00835	0.00832	0.0083	0.00829	0.00828	0.00806	0.00791	0.00778	0.00763	0.00747	0.00744	0.0074	0.00745	0.00739	0.00734	0.00717	0.00704	0.00677	0.00649
2152.15	0.00954	0.00947	0.00969	0.00956	0.00939	0.00915	0.00896	0.00866	0.00851	0.00854	0.00835	0.00832	0.0083	0.00829	0.00828	0.00807	0.00792	0.00778	0.00763	0.00747	0.00744	0.0074	0.00745	0.00739	0.00734	0.00717	0.00705	0.00677	0.00649
2154.08	0.00954	0.00947	0.0097	0.00956	0.00939	0.00915	0.00896	0.00866	0.00852	0.00854	0.00835	0.00832	0.0083	0.00829	0.00828	0.00807	0.00792	0.00778	0.00764	0.00747	0.00744	0.0074	0.00745	0.00739	0.00734	0.00717	0.00705	0.00678	0.00649
2156.01	0.00954	0.00947	0.0097	0.00956	0.00939	0.00915	0.00896	0.00866	0.00853	0.00854	0.00835	0.00832	0.0083	0.00829	0.00828	0.00807	0.00793	0.00779	0.00764	0.00747	0.00744	0.00741	0.00746	0.00739	0.00734	0.00717	0.00705	0.00678	0.0065
2157.94	0.00954	0.00948	0.0097	0.00956	0.00939	0.00916	0.00897	0.00866	0.00853	0.00855	0.00836	0.00833	0.0083	0.0083	0.00829	0.00807	0.00794	0.00779	0.00765	0.00748	0.00744	0.00741	0.00746	0.0074	0.00735	0.00718	0.00705	0.00679	0.0065
2159.87	0.00954	0.00948	0.0097	0.00957	0.0094	0.00916	0.00897	0.00866	0.00853	0.00855	0.00836	0.00833	0.00831	0.0083	0.00829	0.00807	0.00794	0.0078	0.00765	0.00748	0.00745	0.00741	0.00746	0.0074	0.00736	0.00718	0.00706	0.00679	0.00651
2161.8	0.00954	0.00948	0.0097	0.00957	0.0094	0.00916	0.00898	0.00867	0.00852	0.00856	0.00837	0.00833	0.00831	0.0083	0.00829	0.00807	0.00794	0.0078	0.00765	0.00749	0.00745	0.00741	0.00747	0.00741	0.00736	0.00718	0.00706	0.0068	0.00652
2163.72	0.00954	0.00947	0.0097	0.00957	0.0094	0.00916	0.00897	0.00867	0.00852	0.00855	0.00836	0.00833	0.00831	0.00831	0.00829	0.00807	0.00794	0.00781	0.00766	0.00748	0.00745	0.00742	0.00747	0.00741	0.00736	0.00719	0.00706	0.0068	0.00652
2165.65	0.00954	0.00947	0.0097	0.00957	0.0094	0.00916	0.00897	0.00867	0.00852	0.00855	0.00836	0.00833	0.00831	0.00831	0.00829	0.00807	0.00794	0.00781	0.00766	0.00748	0.00745	0.00742	0.00746	0.00741	0.00736	0.00719	0.00706	0.0068	0.00652
2167.58	0.00954	0.00947	0.0097	0.00956	0.00939	0.00916	0.00898	0.00867	0.00852	0.00855	0.00837	0.00833	0.00831	0.00831	0.00829	0.00807	0.00794	0.00781	0.00765	0.00749	0.00746	0.00742	0.00747	0.00741	0.00736	0.00719	0.00706	0.0068	0.00652
2169.51	0.00954	0.00947	0.0097	0.00956	0.00939	0.00916	0.00898	0.00867	0.00852	0.00856	0.00837	0.00833	0.00831	0.00831	0.00829	0.00808	0.00795	0.00781	0.00766	0.00749	0.00746	0.00742	0.00747	0.00741	0.00737	0.00719	0.00707	0.0068	0.00652
2171.44	0.00953	0.00947	0.0097	0.00956	0.00939	0.00916	0.00898	0.00867	0.00852	0.00855	0.00837	0.00833	0.00832	0.00831	0.00829	0.00808	0.00795	0.00781	0.00766	0.00749	0.00746	0.00742	0.00748	0.00741	0.00737	0.00719	0.00707	0.0068	0.00653
2173.37	0.00953	0.00947	0.0097	0.00956	0.00939	0.00916	0.00898	0.00867	0.00852	0.00855	0.00837	0.00833	0.00832	0.00831	0.0083	0.00808	0.00795	0.00781	0.00766	0.00749	0.00746	0.00742	0.00748	0.00741	0.00737	0.0072	0.00708	0.0068	0.00653
2175.3	0.00953	0.00947	0.0097	0.00956	0.00939	0.00916	0.00898	0.00867	0.00852	0.00856	0.00837	0.00833	0.00832	0.00831	0.0083	0.00808	0.00795	0.00781	0.00767	0.00749	0.00746	0.00743	0.00748	0.00742	0.00737	0.0072	0.00708	0.0068	0.00653
2177.22	0.00953	0.00947	0.0097	0.00957	0.00939	0.00916	0.00898	0.00867	0.00852	0.00856	0.00837	0.00833	0.00832	0.00831	0.0083	0.00808	0.00796	0.00781	0.00767	0.00749	0.00746	0.00743	0.00748	0.00742	0.00737	0.0072	0.00708	0.00681	0.00653
2179.15	0.00953	0.00947	0.0097	0.00956	0.00939	0.00916	0.00897	0.00867	0.00853	0.00856	0.00837	0.00833	0.00832	0.00831	0.0083	0.00808	0.00795	0.00781	0.00767	0.00749	0.00746	0.00743	0.00749	0.00742	0.00737	0.0072	0.00708	0.00681	0.00653
2181.08	0.00953	0.00946	0.00969	0.00956	0.00939	0.00915	0.00897	0.00867	0.00853	0.00856	0.00837	0.00833	0.00832	0.00831	0.00829	0.00809	0.00795	0.00782	0.00767	0.00749	0.00746	0.00743	0.00749	0.00742	0.00737	0.0072	0.00708	0.00681	0.00653
2183.01	0.00953	0.00946	0.00969	0.00956	0.00939	0.00915	0.00897	0.00867	0.00853	0.00855	0.00837	0.00833	0.00832	0.00831	0.00829	0.00809	0.00796	0.00781	0.00766	0.0075	0.00747	0.00743	0.00749	0.00742	0.00738	0.0072	0.00708	0.00681	0.00653
2184.94	0.00952	0.00945	0.00969	0.00955	0.00939	0.00915	0.00897	0.00866	0.00853	0.00855	0.00836	0.00833	0.00832	0.0083	0.00829	0.00808	0.00796	0.00781	0.00766	0.0075	0.00747	0.00743	0.00749	0.00742	0.00737	0.0072	0.00709	0.00681	0.00654
2186.87	0.00951	0.00945	0.00968	0.00955	0.00938	0.00915	0.00896	0.00866	0.00852	0.00855	0.00836	0.00833	0.00831	0.0083	0.00829	0.00808	0.00795	0.00781	0.00766	0.0075	0.00747	0.00742	0.00748	0.00742	0.00737	0.0072	0.00708	0.00681	0.00654
2188.79	0.00951	0.00945	0.00968	0.00954	0.00938	0.00914	0.00896	0.00866	0.00851	0.00855	0.00836	0.00833	0.00831	0.0083	0.00829	0.00807	0.00795	0.00782	0.00766	0.00749	0.00747	0.00742	0.00748	0.00742	0.00737	0.0072	0.00708	0.00681	0.00654
2190.72	0.00951	0.00944	0.00968	0.00954	0.00938	0.00914	0.00896	0.00866	0.00851	0.00855	0.00836	0.00833	0.00831	0.0083	0.00829	0.00808	0.00795	0.00782	0.00767	0.00749	0.00747	0.00743	0.00748	0.00742	0.00737	0.0072	0.00708	0.00681	0.00654
2192.65	0.00951	0.00944	0.00968	0.00954	0.00938	0.00915	0.00896	0.00866	0.00851	0.00855	0.00836	0.00833	0.00831	0.0083	0.00829	0.00808	0.00795	0.00781	0.00767	0.00749	0.00747	0.00743	0.00748	0.00742	0.00737	0.00721	0.00708	0.00682	0.00654
2194.58	0.00951	0.00944	0.00968	0.00954	0.00938	0.00915	0.00896	0.00866	0.00851	0.00855	0.00836	0.00833	0.00831	0.00831	0.0083	0.00808	0.00796	0.00781	0.00767	0.0075	0.00747	0.00744	0.00749	0.00742	0.00737	0.00721	0.00709	0.00682	0.00654
2196.51	0.00951	0.00945	0.00968	0.00954	0.00938	0.00915	0.00896	0.00866	0.00852	0.00855	0.00836	0.00833	0.00831	0.00831	0.0083	0.00808	0.00796	0.00781	0.00767	0.0075	0.00747	0.00744	0.00749	0.00743	0.00738	0.00721	0.00709	0.00683	0.00655
2198.44	0.00951	0.00945	0.00967	0.00954	0.00937	0.00915	0.00896	0.00866	0.00852	0.00855	0.00836	0.00833	0.00831	0.00831	0.0083	0.00808	0.00796	0.00781	0.00767	0.0075	0.00747	0.00744	0.00749	0.00743	0.00738	0.00721	0.00709	0.00683	0.00655
2200.37	0.00951	0.00945	0.00967	0.00954	0.00937	0.00915	0.00896	0.00866	0.00851	0.00855	0.00836	0.00833	0.00831	0.00831	0.0083	0.00808	0.00796	0.0078	0.00768	0.0075	0.00747	0.00744	0.00749	0.00743	0.00738	0.00721	0.00709	0.00683	0.00655
2202.29	0.00951	0.00945	0.00967	0.00954	0.00937	0.00915	0.00896	0.00866	0.00851	0.00855	0.00836	0.00833	0.00831	0.00831	0.0083	0.00808	0.00796	0.0078	0.00768	0.0075	0.00747	0.00744	0.00749	0.00743	0.00738	0.00722	0.00709	0.00683	0.00655
2204.22	0.0095	0.00944	0.00967	0.00953	0.00937	0.00914	0.00896	0.00866	0.0085	0.00855	0.00836	0.00833	0.00831	0.00831	0.0083	0.00808	0.00796	0.00781	0.00768	0.0075	0.00747	0.00744	0.00749	0.00743	0.00739	0.00722	0.00709	0.00683	0.00656
2206.15	0.0095	0.00944	0.00966	0.00953	0.00936	0.00914	0.00895	0.00865	0.00851	0.00855	0.00836	0.00833	0.00831	0.00831	0.0083	0.00808	0.00796	0.00783	0.00767	0.0075	0.00747	0.00744	0.00749	0.00743	0.00739	0.00722	0.00709	0.00684	0.00656
2208.08	0.00949	0.00943	0.00966	0.00953	0.00936	0.00913	0.00895	0.00865	0.00851	0.00855	0.00836	0.00833	0.00831	0.00831	0.0083	0.00809	0.00795	0.00783	0.00767	0.0075	0.00748	0.00744	0.00749	0.00743	0.00739	0.00722	0.0071	0.00684	0.00656
2210.01	0.00949	0.00943	0.00966	0.00953	0.00936	0.00913	0.00895	0.00865	0.00851	0.00855	0.00836	0.00833	0.00831	0.00831	0.0083	0.00809	0.00795	0.00782	0.00767	0.00751	0.00748	0.00744	0.00749	0.00743	0.00739	0.00722	0.0071	0.00684	0.00657
2211.94	0.00948	0.00942	0.00966	0.00952	0.00935	0.00913	0.00895	0.00865	0.0085	0.00854	0.00836	0.00833	0.00831	0.00831	0.0083	0.00809	0.00795	0.00782	0.00767	0.00751	0.00748	0.00744	0.0075	0.00743	0.00739	0.00722	0.0071	0.00684	0.00657
2213.86	0.00948	0.00942	0.00966	0.00952	0.00935	0.00913	0.00895	0.00865	0.0085	0.00854	0.00836	0.00832	0.00831	0.00831	0.00829	0.00808	0.00795	0.00783	0.00767	0.00751	0.00748	0.00744	0.0075	0.00744	0.00739	0.00722	0.0071	0.00684	0.00657
2215.79	0.00948	0.00941	0.00965	0.00952	0.00935	0.00913	0.00895	0.00864	0.00849	0.00854	0.00835	0.00832	0.00831	0.00831	0.00829	0.00808	0.00795	0.00783	0.00767	0.0075	0.00748	0.00745	0.0075	0.00743	0.00739	0.00722	0.0071	0.00684	0.00657
2217.72	0.00947	0.00941	0.00964	0.00951	0.00935	0.00913	0.00894	0.00864	0.00849	0.00854	0.00835	0.00832	0.00831	0.0083	0.00829	0.00809	0.00795	0.00782	0.00767	0.0075	0.00747	0.00745	0.00749	0.00743	0.00739	0.00722	0.0071	0.00684	0.00657
2219.65	0.00947	0.00941	0.00964	0.00951	0.00934	0.00912	0.00894	0.00864	0.00849	0.00854	0.00834	0.00832	0.00831	0.0083	0.00829	0.00808	0.00795	0.00782	0.00767	0.0075	0.00747	0.00744	0.0075	0.00744	0.00739	0.00722	0.0071	0.00684	0.00657
2221.58	0.00946	0.0094	0.00964	0.00951	0.00934	0.00912	0.00895	0.00864	0.00849	0.00854	0.00834	0.00832	0.00831	0.0083	0.00829	0.00808	0.00795	0.00783	0.00767	0.0075	0.00747	0.00744	0.0075	0.00744	0.00739	0.00722	0.0071	0.00684	0.00657
2223.51	0.00946	0.0094	0.00964	0.00951	0.00934	0.00912	0.00894	0.00864	0.00849	0.00854	0.00834	0.00832	0.00831	0.0083	0.00829	0.00808	0.00796	0.00782	0.00767	0.0075	0.00748	0.00745	0.0075	0.00744	0.00739	0.00723	0.0071	0.00684	0.00657
2225.44	0.00946	0.0094	0.00963	0.0095	0.00933	0.00912	0.00894	0.00864	0.00849	0.00853	0.00835	0.00832	0.0083	0.0083	0.00829	0.00808	0.00796	0.0078	0.00768	0.0075	0.00748	0.00745	0.0075	0.00744	0.0074	0.00723	0.0071	0.00685	0.00658
2227.36	0.00946	0.00939	0.00963	0.0095	0.00933	0.00911	0.00894	0.00864	0.00849	0.00853	0.00835	0.00832	0.00831	0.0083	0.00829	0.00808	0.00796	0.00781	0.00768	0.00751	0.00748	0.00745	0.0075	0.00745	0.0074	0.00723	0.0071	0.00685	0.00658
2229.29	0.00945	0.00939	0.00962	0.0095	0.00933	0.00911	0.00894	0.00863	0.00849	0.00853	0.00835	0.00832	0.00831	0.0083	0.00829	0.00808	0.00796	0.00782	0.00768	0.00751	0.00748	0.00745	0.0075	0.00745	0.0074	0.00723	0.00711	0.00685	0.00658
2231.22	0.00945	0.00939	0.00962	0.00949	0.00933	0.0091	0.00893	0.00863	0.00849	0.00852	0.00835	0.00831	0.00831	0.00829	0.00829	0.00808	0.00795	0.00782	0.00767	0.00751	0.00748	0.00745	0.0075	0.00744	0.0074	0.00723	0.00711	0.00686	0.00658
2233.15	0.00945	0.00939	0.00962	0.00949	0.00933	0.0091	0.00893	0.00863	0.00848	0.00853	0.00835	0.00831	0.00831	0.0083	0.00829	0.00809	0.00795	0.00781	0.00768	0.00751	0.00748	0.00745	0.00751	0.00744	0.0074	0.00723	0.00711	0.00686	0.00658
2235.08	0.00945	0.00939	0.00962	0.00949	0.00933	0.0091	0.00893	0.00863	0.00849	0.00853	0.00835	0.00832	0.00831	0.0083	0.00829	0.00809	0.00796	0.00782	0.00768	0.00751	0.00748	0.00746	0.00751	0.00744	0.0074	0.00723	0.00712	0.00686	0.00659
2237.01	0.00945	0.00939	0.00961	0.00949	0.00932	0.0091	0.00893	0.00863	0.00849	0.00853	0.00835	0.00832	0.00831	0.0083	0.00829	0.00809	0.00796	0.00783	0.00768	0.00751	0.00748	0.00746	0.00751	0.00744	0.0074	0.00724	0.00712	0.00686	0.00659
2238.93	0.00945	0.00938	0.00961	0.00949	0.00932	0.0091	0.00893	0.00863	0.00849	0.00853	0.00835	0.00832	0.00831	0.0083	0.0083	0.00809	0.00796	0.00784	0.00768	0.00752	0.00749	0.00746	0.00751	0.00745	0.00741	0.00724	0.00712	0.00686	0.0066
2240.86	0.00944	0.00938	0.0096	0.00948	0.00932	0.0091	0.00892	0.00863	0.00849	0.00853	0.00835	0.00832	0.00831	0.0083	0.0083	0.00809	0.00796	0.00784	0.00769	0.00752	0.00749	0.00746	0.00751	0.00745	0.00741	0.00724	0.00712	0.00687	0.0066
2242.79	0.00943	0.00937	0.0096	0.00947	0.00931	0.00909	0.00892	0.00862	0.00849	0.00852	0.00834	0.00832	0.00831	0.0083	0.0083	0.00809	0.00796	0.00783	0.00769	0.00752	0.00749	0.00746	0.00752	0.00745	0.00741	0.00724	0.00712	0.00687	0.0066
2244.72	0.00942	0.00937	0.0096	0.00947	0.00931	0.00909	0.00892	0.00862	0.00848	0.00852	0.00834	0.00831	0.0083	0.0083	0.0083	0.00809	0.00796	0.00783	0.00769	0.00752	0.00749	0.00746	0.00752	0.00745	0.00741	0.00724	0.00712	0.00687	0.0066
2246.65	0.00942	0.00936	0.00959	0.00946	0.0093	0.00909	0.00891	0.00861	0.00848	0.00852	0.00834	0.00831	0.0083	0.0083	0.0083	0.00809	0.00796	0.00783	0.00769	0.00752	0.00749	0.00746	0.00752	0.00745	0.00741	0.00725	0.00712	0.00687	0.0066
2248.58	0.00941	0.00935	0.00958	0.00945	0.00929	0.00908	0.00891	0.00861	0.00848	0.00851	0.00834	0.00831	0.0083	0.0083	0.00829	0.00808	0.00796	0.00783	0.00768	0.00752	0.00748	0.00746	0.00752	0.00745	0.00741	0.00725	0.00713	0.00687	0.0066
2250.51	0.00941	0.00934	0.00957	0.00945	0.00929	0.00908	0.0089	0.0086	0.00847	0.00851	0.00833	0.0083	0.00829	0.00829	0.00829	0.00808	0.00796	0.00783	0.00768	0.00752	0.00748	0.00745	0.00752	0.00745	0.00741	0.00725	0.00713	0.00687	0.00661
2252.43	0.0094	0.00933	0.00956	0.00944	0.00929	0.00907	0.0089	0.0086	0.00846	0.00851	0.00833	0.0083	0.00829	0.00829	0.00828	0.00808	0.00796	0.00782	0.00768	0.00751	0.00748	0.00745	0.00751	0.00745	0.00741	0.00724	0.00713	0.00687	0.00661
2254.36	0.00939	0.00933	0.00956	0.00943	0.00928	0.00906	0.00889	0.0086	0.00845	0.0085	0.00832	0.0083	0.00829	0.00828	0.00828	0.00807	0.00795	0.00781	0.00767	0.00751	0.00748	0.00745	0.00751	0.00745	0.0074	0.00724	0.00713	0.00687	0.0066
2256.29	0.00938	0.00932	0.00955	0.00942	0.00927	0.00905	0.00888	0.00859	0.00844	0.0085	0.00832	0.00829	0.00828	0.00828	0.00827	0.00807	0.00795	0.00781	0.00767	0.00751	0.00748	0.00745	0.00751	0.00745	0.0074	0.00724	0.00713	0.00687	0.0066
2258.22	0.00936	0.0093	0.00954	0.00941	0.00926	0.00904	0.00887	0.00858	0.00844	0.00849	0.00831	0.00828	0.00828	0.00827	0.00827	0.00807	0.00794	0.00781	0.00767	0.00751	0.00748	0.00745	0.0075	0.00745	0.0074	0.00724	0.00713	0.00687	0.0066
2260.15	0.00936	0.00929	0.00954	0.0094	0.00925	0.00904	0.00887	0.00858	0.00844	0.00848	0.0083	0.00828	0.00827	0.00827	0.00827	0.00806	0.00794	0.00781	0.00767	0.0075	0.00748	0.00745	0.0075	0.00744	0.0074	0.00724	0.00712	0.00686	0.0066
2262.08	0.00935	0.00928	0.00953	0.00939	0.00924	0.00903	0.00886	0.00857	0.00844	0.00848	0.0083	0.00828	0.00827	0.00826	0.00826	0.00806	0.00794	0.00781	0.00767	0.0075	0.00748	0.00745	0.0075	0.00744	0.0074	0.00724	0.00712	0.00687	0.0066
2264	0.00934	0.00928	0.00951	0.00938	0.00923	0.00902	0.00885	0.00857	0.00843	0.00847	0.00829	0.00828	0.00826	0.00826	0.00826	0.00806	0.00794	0.00781	0.00767	0.0075	0.00747	0.00745	0.0075	0.00744	0.0074	0.00723	0.00712	0.00687	0.0066
2265.93	0.00933	0.00927	0.0095	0.00938	0.00922	0.00901	0.00884	0.00856	0.00842	0.00847	0.00828	0.00827	0.00826	0.00825	0.00825	0.00806	0.00794	0.00782	0.00767	0.0075	0.00747	0.00745	0.0075	0.00745	0.00739	0.00723	0.00712	0.00687	0.0066
2267.86	0.00932	0.00925	0.00949	0.00936	0.00921	0.009	0.00883	0.00855	0.00841	0.00846	0.00828	0.00826	0.00825	0.00825	0.00824	0.00805	0.00793	0.00782	0.00766	0.0075	0.00747	0.00744	0.0075	0.00744	0.00739	0.00723	0.00712	0.00687	0.0066
2269.79	0.0093	0.00924	0.00948	0.00935	0.00921	0.00899	0.00883	0.00854	0.0084	0.00845	0.00827	0.00825	0.00825	0.00825	0.00824	0.00804	0.00792	0.00781	0.00766	0.00749	0.00747	0.00744	0.0075	0.00744	0.00739	0.00723	0.00712	0.00686	0.0066
2271.72	0.00929	0.00922	0.00947	0.00934	0.0092	0.00898	0.00882	0.00853	0.00839	0.00844	0.00827	0.00824	0.00824	0.00824	0.00823	0.00804	0.00792	0.0078	0.00766	0.00749	0.00747	0.00743	0.00749	0.00744	0.00739	0.00723	0.00712	0.00686	0.0066
2273.65	0.00928	0.00921	0.00945	0.00933	0.00918	0.00897	0.00881	0.00852	0.00838	0.00844	0.00826	0.00824	0.00824	0.00824	0.00823	0.00804	0.00792	0.00779	0.00766	0.00749	0.00746	0.00743	0.00749	0.00743	0.00739	0.00723	0.00711	0.00686	0.0066
2275.57	0.00927	0.0092	0.00944	0.00932	0.00917	0.00896	0.0088	0.00851	0.00837	0.00843	0.00826	0.00823	0.00823	0.00823	0.00822	0.00803	0.00792	0.00779	0.00765	0.00749	0.00746	0.00743	0.00749	0.00743	0.00739	0.00723	0.00712	0.00686	0.0066
2277.5	0.00925	0.00919	0.00942	0.0093	0.00915	0.00895	0.00879	0.0085	0.00837	0.00843	0.00825	0.00823	0.00822	0.00822	0.00821	0.00803	0.00792	0.0078	0.00764	0.00749	0.00746	0.00743	0.00749	0.00743	0.00738	0.00723	0.00711	0.00686	0.00661
2279.43	0.00924	0.00918	0.00941	0.00929	0.00914	0.00893	0.00878	0.00849	0.00836	0.00842	0.00824	0.00822	0.00822	0.00822	0.00821	0.00802	0.00792	0.00779	0.00764	0.00748	0.00746	0.00743	0.00749	0.00743	0.00738	0.00723	0.00711	0.00687	0.00661
2281.36	0.00922	0.00916	0.00939	0.00927	0.00912	0.00892	0.00877	0.00848	0.00835	0.00841	0.00823	0.00821	0.00821	0.00821	0.0082	0.00802	0.00791	0.00778	0.00764	0.00748	0.00746	0.00743	0.00749	0.00742	0.00738	0.00722	0.00711	0.00687	0.00661
2283.29	0.0092	0.00915	0.00938	0.00926	0.00911	0.0089	0.00876	0.00847	0.00834	0.00839	0.00823	0.0082	0.0082	0.0082	0.0082	0.00801	0.0079	0.00777	0.00764	0.00747	0.00745	0.00742	0.00749	0.00742	0.00738	0.00722	0.00711	0.00686	0.00661
2285.22	0.00918	0.00913	0.00936	0.00924	0.00909	0.00889	0.00875	0.00846	0.00833	0.00838	0.00822	0.00819	0.0082	0.0082	0.00819	0.008	0.0079	0.00776	0.00763	0.00747	0.00745	0.00742	0.00748	0.00742	0.00737	0.00722	0.00711	0.00686	0.00661
2287.15	0.00917	0.00911	0.00935	0.00922	0.00908	0.00888	0.00873	0.00845	0.00831	0.00837	0.0082	0.00819	0.00819	0.00819	0.00818	0.008	0.00789	0.00776	0.00763	0.00747	0.00744	0.00742	0.00748	0.00741	0.00737	0.00721	0.00711	0.00685	0.00661
2289.07	0.00915	0.0091	0.00933	0.00921	0.00907	0.00887	0.00872	0.00844	0.0083	0.00836	0.00819	0.00818	0.00818	0.00818	0.00818	0.00799	0.00788	0.00776	0.00762	0.00746	0.00744	0.00741	0.00747	0.00741	0.00737	0.00721	0.00711	0.00686	0.00661
2291	0.00913	0.00908	0.00931	0.00919	0.00905	0.00886	0.0087	0.00842	0.00829	0.00835	0.00818	0.00817	0.00817	0.00817	0.00817	0.00798	0.00788	0.00776	0.00762	0.00746	0.00744	0.00741	0.00747	0.00741	0.00737	0.00721	0.0071	0.00686	0.0066
2292.93	0.00911	0.00906	0.00929	0.00917	0.00903	0.00884	0.00869	0.00841	0.00828	0.00834	0.00817	0.00816	0.00816	0.00816	0.00816	0.00798	0.00787	0.00774	0.00761	0.00746	0.00743	0.00741	0.00747	0.00741	0.00736	0.00722	0.0071	0.00686	0.0066
2294.86	0.00909	0.00904	0.00927	0.00916	0.00901	0.00883	0.00867	0.00839	0.00826	0.00833	0.00816	0.00815	0.00815	0.00815	0.00815	0.00798	0.00787	0.00774	0.00761	0.00746	0.00743	0.00741	0.00746	0.0074	0.00736	0.00722	0.0071	0.00686	0.0066
2296.79	0.00907	0.00902	0.00925	0.00914	0.00899	0.00881	0.00866	0.00838	0.00825	0.00832	0.00815	0.00814	0.00814	0.00814	0.00815	0.00797	0.00786	0.00774	0.00761	0.00745	0.00743	0.0074	0.00746	0.0074	0.00736	0.00721	0.0071	0.00686	0.0066
2298.72	0.00906	0.009	0.00924	0.00912	0.00898	0.00879	0.00864	0.00837	0.00824	0.00831	0.00815	0.00813	0.00813	0.00813	0.00814	0.00796	0.00786	0.00775	0.0076	0.00744	0.00742	0.00739	0.00746	0.0074	0.00736	0.0072	0.0071	0.00685	0.0066
2300.64	0.00904	0.00899	0.00922	0.0091	0.00896	0.00878	0.00863	0.00836	0.00823	0.00829	0.00814	0.00813	0.00812	0.00813	0.00813	0.00796	0.00785	0.00774	0.0076	0.00744	0.00742	0.00739	0.00746	0.00739	0.00735	0.0072	0.00709	0.00685	0.0066
2302.57	0.00902	0.00897	0.0092	0.00908	0.00894	0.00876	0.00862	0.00834	0.00821	0.00828	0.00813	0.00812	0.00811	0.00812	0.00813	0.00795	0.00784	0.00773	0.00759	0.00743	0.00741	0.00739	0.00745	0.00739	0.00735	0.0072	0.00709	0.00685	0.0066
2304.5	0.009	0.00894	0.00918	0.00906	0.00893	0.00874	0.0086	0.00833	0.0082	0.00827	0.00811	0.0081	0.0081	0.00811	0.00811	0.00794	0.00783	0.00772	0.00758	0.00743	0.00741	0.00739	0.00745	0.00739	0.00734	0.0072	0.00709	0.00684	0.0066
2306.43	0.00898	0.00892	0.00916	0.00904	0.00891	0.00872	0.00859	0.00831	0.00819	0.00826	0.0081	0.00809	0.0081	0.0081	0.0081	0.00793	0.00783	0.00771	0.00758	0.00742	0.0074	0.00739	0.00744	0.00739	0.00734	0.00719	0.00709	0.00684	0.0066
2308.36	0.00896	0.0089	0.00914	0.00902	0.00889	0.00871	0.00857	0.0083	0.00818	0.00825	0.00809	0.00808	0.00809	0.00809	0.00809	0.00792	0.00782	0.00771	0.00757	0.00742	0.0074	0.00738	0.00744	0.00738	0.00734	0.00719	0.00708	0.00684	0.0066
2310.29	0.00894	0.00889	0.00912	0.009	0.00887	0.0087	0.00856	0.00829	0.00817	0.00824	0.00809	0.00807	0.00808	0.00808	0.00808	0.00792	0.00782	0.0077	0.00757	0.00741	0.0074	0.00738	0.00744	0.00738	0.00734	0.00719	0.00708	0.00684	0.0066
2312.22	0.00893	0.00887	0.00911	0.00899	0.00886	0.00868	0.00855	0.00828	0.00816	0.00823	0.00808	0.00807	0.00807	0.00808	0.00808	0.00791	0.00781	0.0077	0.00757	0.00741	0.0074	0.00737	0.00743	0.00738	0.00734	0.00719	0.00708	0.00684	0.0066
2314.14	0.00891	0.00886	0.00909	0.00897	0.00885	0.00867	0.00854	0.00827	0.00815	0.00822	0.00807	0.00806	0.00807	0.00807	0.00807	0.0079	0.00781	0.00769	0.00757	0.00741	0.00739	0.00737	0.00743	0.00737	0.00734	0.00719	0.00708	0.00685	0.0066
2316.07	0.00889	0.00885	0.00908	0.00896	0.00883	0.00866	0.00853	0.00826	0.00814	0.00821	0.00806	0.00806	0.00806	0.00806	0.00807	0.0079	0.0078	0.00769	0.00756	0.00741	0.00739	0.00737	0.00743	0.00737	0.00734	0.00719	0.00708	0.00685	0.0066
2318	0.00887	0.00883	0.00906	0.00895	0.00882	0.00865	0.00852	0.00825	0.00813	0.00821	0.00805	0.00805	0.00805	0.00806	0.00806	0.00789	0.0078	0.00768	0.00756	0.00741	0.00739	0.00737	0.00743	0.00737	0.00734	0.00718	0.00708	0.00685	0.0066
2319.93	0.00886	0.00881	0.00904	0.00893	0.0088	0.00864	0.0085	0.00824	0.00812	0.0082	0.00804	0.00804	0.00803	0.00805	0.00805	0.00789	0.0078	0.00768	0.00755	0.0074	0.00738	0.00736	0.00742	0.00737	0.00733	0.00718	0.00708	0.00684	0.0066
2321.86	0.00885	0.00879	0.00903	0.00892	0.00879	0.00862	0.00849	0.00822	0.00811	0.00819	0.00803	0.00802	0.00803	0.00804	0.00804	0.00788	0.00779	0.00767	0.00754	0.00739	0.00738	0.00736	0.00742	0.00736	0.00733	0.00718	0.00707	0.00684	0.0066
2323.79	0.00884	0.00878	0.00901	0.0089	0.00878	0.00861	0.00847	0.00821	0.00809	0.00817	0.00802	0.00801	0.00802	0.00803	0.00803	0.00787	0.00778	0.00766	0.00754	0.00739	0.00737	0.00735	0.00742	0.00736	0.00732	0.00717	0.00707	0.00683	0.00659
2325.71	0.00883	0.00877	0.009	0.00889	0.00877	0.0086	0.00847	0.0082	0.00809	0.00816	0.00801	0.008	0.00801	0.00802	0.00803	0.00787	0.00778	0.00766	0.00754	0.00738	0.00737	0.00735	0.00742	0.00736	0.00731	0.00717	0.00707	0.00683	0.00659
2327.64	0.00882	0.00876	0.00899	0.00888	0.00876	0.00859	0.00846	0.00819	0.00808	0.00815	0.00801	0.008	0.00801	0.00802	0.00802	0.00787	0.00777	0.00765	0.00753	0.00738	0.00737	0.00735	0.00741	0.00735	0.00731	0.00716	0.00706	0.00683	0.00659
2329.57	0.00881	0.00875	0.00898	0.00887	0.00874	0.00858	0.00845	0.00818	0.00807	0.00814	0.008	0.00799	0.008	0.00801	0.00802	0.00786	0.00776	0.00765	0.00752	0.00738	0.00736	0.00735	0.00741	0.00735	0.00731	0.00716	0.00706	0.00682	0.00659
2331.5	0.00879	0.00874	0.00897	0.00886	0.00873	0.00857	0.00844	0.00818	0.00807	0.00814	0.00799	0.00799	0.008	0.00801	0.00801	0.00785	0.00776	0.00765	0.00752	0.00737	0.00736	0.00734	0.0074	0.00735	0.0073	0.00716	0.00706	0.00682	0.00658
2333.43	0.00878	0.00873	0.00896	0.00885	0.00872	0.00856	0.00843	0.00817	0.00806	0.00813	0.00798	0.00798	0.00799	0.008	0.008	0.00785	0.00775	0.00764	0.00752	0.00737	0.00735	0.00733	0.00739	0.00734	0.0073	0.00716	0.00705	0.00681	0.00658
2335.36	0.00876	0.00871	0.00894	0.00883	0.00871	0.00854	0.00841	0.00816	0.00804	0.00812	0.00797	0.00797	0.00798	0.00799	0.00799	0.00784	0.00774	0.00763	0.00751	0.00736	0.00735	0.00732	0.00738	0.00733	0.00729	0.00715	0.00705	0.00681	0.00657
2337.29	0.00875	0.0087	0.00892	0.00882	0.00869	0.00853	0.0084	0.00815	0.00803	0.00811	0.00796	0.00796	0.00797	0.00797	0.00798	0.00782	0.00774	0.00761	0.0075	0.00735	0.00734	0.00731	0.00738	0.00732	0.00728	0.00714	0.00704	0.0068	0.00656
2339.21	0.00874	0.00869	0.00891	0.00882	0.00868	0.00852	0.0084	0.00814	0.00802	0.0081	0.00795	0.00795	0.00796	0.00797	0.00797	0.00782	0.00773	0.0076	0.00749	0.00734	0.00733	0.00731	0.00737	0.00732	0.00727	0.00713	0.00703	0.0068	0.00656
2341.14	0.00875	0.0087	0.00892	0.00882	0.00869	0.00853	0.00841	0.00814	0.00803	0.00811	0.00796	0.00796	0.00797	0.00797	0.00798	0.00782	0.00773	0.00761	0.00749	0.00735	0.00733	0.00731	0.00738	0.00732	0.00728	0.00713	0.00704	0.00681	0.00656
2343.07	0.00876	0.00871	0.00894	0.00883	0.00871	0.00855	0.00842	0.00815	0.00804	0.00812	0.00797	0.00797	0.00798	0.00798	0.00799	0.00784	0.00774	0.00763	0.0075	0.00735	0.00734	0.00733	0.00739	0.00733	0.00729	0.00714	0.00704	0.00682	0.00657
2345	0.00878	0.00873	0.00896	0.00885	0.00873	0.00856	0.00843	0.00817	0.00806	0.00814	0.00799	0.00798	0.00799	0.008	0.00801	0.00785	0.00775	0.00764	0.00752	0.00736	0.00735	0.00734	0.0074	0.00734	0.0073	0.00715	0.00706	0.00683	0.00658
2346.93	0.0088	0.00874	0.00897	0.00887	0.00875	0.00857	0.00844	0.00818	0.00807	0.00815	0.008	0.008	0.00801	0.00802	0.00802	0.00786	0.00777	0.00765	0.00753	0.00738	0.00736	0.00735	0.00741	0.00735	0.00731	0.00716	0.00707	0.00683	0.00659
2348.86	0.00881	0.00875	0.00898	0.00887	0.00875	0.00858	0.00845	0.00819	0.00808	0.00816	0.00801	0.00801	0.00801	0.00803	0.00803	0.00787	0.00777	0.00766	0.00754	0.00738	0.00737	0.00735	0.00741	0.00736	0.00731	0.00717	0.00707	0.00684	0.0066
2350.78	0.00881	0.00876	0.00899	0.00888	0.00876	0.00859	0.00846	0.0082	0.00808	0.00816	0.00801	0.00801	0.00802	0.00803	0.00803	0.00787	0.00777	0.00766	0.00754	0.00738	0.00737	0.00734	0.00741	0.00736	0.00731	0.00718	0.00707	0.00684	0.0066
2352.71	0.00881	0.00876	0.00899	0.00888	0.00875	0.00859	0.00846	0.0082	0.00808	0.00816	0.00801	0.00801	0.00801	0.00803	0.00803	0.00787	0.00777	0.00766	0.00754	0.00738	0.00737	0.00734	0.00741	0.00736	0.00731	0.00717	0.00707	0.00685	0.0066
2354.64	0.00881	0.00876	0.00899	0.00888	0.00875	0.00859	0.00846	0.0082	0.00808	0.00816	0.00801	0.00801	0.00801	0.00803	0.00803	0.00787	0.00777	0.00766	0.00754	0.00738	0.00737	0.00735	0.00741	0.00736	0.00731	0.00717	0.00707	0.00685	0.0066
2356.57	0.00881	0.00875	0.00899	0.00888	0.00875	0.00859	0.00846	0.0082	0.00808	0.00815	0.00801	0.00801	0.00801	0.00803	0.00802	0.00787	0.00777	0.00765	0.00754	0.00738	0.00737	0.00735	0.00741	0.00736	0.00731	0.00717	0.00707	0.00684	0.0066
2358.5	0.00881	0.00875	0.00899	0.00888	0.00875	0.00859	0.00846	0.0082	0.00808	0.00816	0.00801	0.008	0.00801	0.00802	0.00802	0.00787	0.00777	0.00765	0.00754	0.00738	0.00737	0.00735	0.00741	0.00736	0.00731	0.00718	0.00707	0.00684	0.0066
2360.43	0.00881	0.00876	0.00899	0.00889	0.00876	0.00859	0.00847	0.0082	0.00808	0.00816	0.00802	0.00801	0.00802	0.00803	0.00803	0.00787	0.00777	0.00766	0.00754	0.00738	0.00737	0.00735	0.00741	0.00736	0.00731	0.00718	0.00707	0.00684	0.0066
2362.36	0.00882	0.00877	0.009	0.0089	0.00877	0.0086	0.00847	0.00821	0.00809	0.00816	0.00802	0.00802	0.00802	0.00803	0.00803	0.00787	0.00778	0.00766	0.00754	0.00739	0.00737	0.00735	0.00741	0.00736	0.00732	0.00718	0.00707	0.00684	0.0066
2364.28	0.00883	0.00879	0.00902	0.00891	0.00879	0.00861	0.00848	0.00822	0.0081	0.00817	0.00803	0.00802	0.00802	0.00804	0.00804	0.00788	0.00778	0.00766	0.00755	0.00739	0.00737	0.00735	0.00742	0.00736	0.00732	0.00718	0.00708	0.00685	0.00661
2366.21	0.00885	0.00881	0.00903	0.00893	0.0088	0.00863	0.0085	0.00824	0.00811	0.00819	0.00804	0.00803	0.00803	0.00804	0.00804	0.00789	0.00779	0.00767	0.00755	0.0074	0.00738	0.00736	0.00742	0.00737	0.00733	0.00718	0.00708	0.00685	0.00661
2368.14	0.00887	0.00883	0.00905	0.00895	0.00882	0.00865	0.00852	0.00825	0.00813	0.00821	0.00805	0.00804	0.00804	0.00805	0.00806	0.0079	0.0078	0.00768	0.00756	0.00741	0.00738	0.00737	0.00743	0.00737	0.00733	0.00719	0.00709	0.00686	0.00662
2370.07	0.0089	0.00885	0.00908	0.00898	0.00884	0.00866	0.00854	0.00827	0.00815	0.00822	0.00807	0.00806	0.00806	0.00807	0.00807	0.00791	0.00781	0.00769	0.00757	0.00741	0.0074	0.00738	0.00744	0.00738	0.00734	0.0072	0.0071	0.00686	0.00663
2372	0.00892	0.00887	0.0091	0.009	0.00887	0.00868	0.00856	0.00829	0.00816	0.00824	0.00808	0.00807	0.00808	0.00808	0.00809	0.00792	0.00783	0.0077	0.00758	0.00742	0.00741	0.00738	0.00745	0.00739	0.00735	0.0072	0.0071	0.00687	0.00663
2373.93	0.00894	0.0089	0.00912	0.00902	0.00889	0.00871	0.00858	0.00831	0.00818	0.00826	0.0081	0.00809	0.00809	0.0081	0.0081	0.00793	0.00784	0.00771	0.00759	0.00743	0.00741	0.00739	0.00745	0.0074	0.00736	0.00721	0.00711	0.00688	0.00664
2375.85	0.00897	0.00892	0.00915	0.00904	0.00892	0.00873	0.0086	0.00832	0.0082	0.00827	0.00811	0.0081	0.0081	0.00811	0.00811	0.00794	0.00785	0.00772	0.00759	0.00743	0.00742	0.00739	0.00746	0.0074	0.00736	0.00721	0.00711	0.00688	0.00664
2377.78	0.009	0.00895	0.00918	0.00907	0.00894	0.00875	0.00862	0.00834	0.00821	0.00828	0.00813	0.00812	0.00812	0.00812	0.00812	0.00795	0.00785	0.00772	0.0076	0.00744	0.00743	0.0074	0.00746	0.00741	0.00737	0.00722	0.00711	0.00688	0.00664
2379.71	0.00903	0.00898	0.00921	0.0091	0.00896	0.00878	0.00864	0.00836	0.00823	0.0083	0.00814	0.00813	0.00813	0.00814	0.00813	0.00797	0.00786	0.00773	0.00761	0.00745	0.00743	0.00741	0.00747	0.00742	0.00737	0.00722	0.00712	0.00688	0.00664
2381.64	0.00905	0.009	0.00924	0.00912	0.00898	0.0088	0.00866	0.00838	0.00825	0.00832	0.00816	0.00815	0.00814	0.00815	0.00814	0.00798	0.00787	0.00774	0.00762	0.00746	0.00744	0.00741	0.00748	0.00743	0.00737	0.00723	0.00713	0.00689	0.00664
2383.57	0.00908	0.00902	0.00926	0.00914	0.00901	0.00882	0.00868	0.0084	0.00826	0.00834	0.00818	0.00817	0.00816	0.00816	0.00815	0.00799	0.00788	0.00775	0.00762	0.00747	0.00745	0.00742	0.00748	0.00743	0.00738	0.00723	0.00713	0.00689	0.00665
2385.5	0.0091	0.00904	0.00929	0.00916	0.00903	0.00884	0.00869	0.00841	0.00828	0.00835	0.00819	0.00817	0.00817	0.00817	0.00817	0.008	0.00789	0.00776	0.00763	0.00747	0.00745	0.00742	0.00749	0.00743	0.00739	0.00724	0.00713	0.0069	0.00665
2387.43	0.00912	0.00906	0.0093	0.00918	0.00904	0.00886	0.00871	0.00842	0.00829	0.00836	0.0082	0.00818	0.00818	0.00818	0.00818	0.008	0.00789	0.00776	0.00763	0.00748	0.00745	0.00743	0.00749	0.00743	0.00739	0.00724	0.00713	0.0069	0.00666
2389.35	0.00913	0.00907	0.00932	0.00919	0.00906	0.00887	0.00872	0.00843	0.0083	0.00836	0.0082	0.00818	0.00819	0.00818	0.00818	0.008	0.00789	0.00777	0.00763	0.00748	0.00745	0.00743	0.00749	0.00743	0.00739	0.00724	0.00713	0.0069	0.00666
2391.28	0.00914	0.00908	0.00933	0.00921	0.00907	0.00888	0.00873	0.00844	0.00831	0.00837	0.00821	0.00819	0.00819	0.00819	0.00819	0.00801	0.0079	0.00777	0.00763	0.00747	0.00746	0.00743	0.00749	0.00744	0.00739	0.00724	0.00713	0.0069	0.00666
2393.21	0.00915	0.00909	0.00933	0.00922	0.00908	0.00889	0.00873	0.00845	0.00832	0.00838	0.00821	0.0082	0.00819	0.00819	0.00819	0.00801	0.0079	0.00777	0.00763	0.00747	0.00746	0.00743	0.00749	0.00744	0.00739	0.00724	0.00713	0.0069	0.00665
2395.14	0.00915	0.00909	0.00934	0.00922	0.00908	0.00889	0.00874	0.00845	0.00832	0.00838	0.00821	0.0082	0.00819	0.00819	0.00819	0.00801	0.0079	0.00777	0.00763	0.00747	0.00746	0.00743	0.00749	0.00743	0.00739	0.00724	0.00713	0.0069	0.00665
2397.07	0.00915	0.0091	0.00934	0.00922	0.00908	0.00889	0.00874	0.00845	0.00832	0.00838	0.00821	0.0082	0.00819	0.00819	0.00819	0.00801	0.0079	0.00777	0.00763	0.00747	0.00746	0.00743	0.00749	0.00743	0.00739	0.00724	0.00713	0.0069	0.00665
2399	0.00915	0.0091	0.00933	0.00922	0.00908	0.00889	0.00874	0.00845	0.00832	0.00838	0.00821	0.0082	0.00819	0.00819	0.00819	0.00801	0.0079	0.00777	0.00763	0.00748	0.00745	0.00743	0.00749	0.00743	0.00739	0.00724	0.00713	0.00689	0.00665
2400.92	0.00915	0.00909	0.00933	0.00922	0.00908	0.00889	0.00873	0.00845	0.00832	0.00838	0.00821	0.00819	0.00819	0.00819	0.00819	0.00801	0.0079	0.00777	0.00763	0.00748	0.00745	0.00742	0.00749	0.00743	0.00739	0.00724	0.00713	0.00689	0.00665
2402.85	0.00915	0.00909	0.00933	0.00922	0.00908	0.00888	0.00873	0.00845	0.00832	0.00838	0.0082	0.00819	0.00819	0.00819	0.00819	0.00801	0.0079	0.00777	0.00763	0.00748	0.00745	0.00742	0.00749	0.00743	0.00739	0.00724	0.00713	0.0069	0.00666
2404.78	0.00915	0.00909	0.00933	0.00922	0.00908	0.00888	0.00873	0.00845	0.00831	0.00838	0.0082	0.00819	0.00819	0.00819	0.00818	0.00801	0.0079	0.00777	0.00763	0.00748	0.00745	0.00743	0.00749	0.00743	0.00739	0.00724	0.00713	0.0069	0.00666
2406.71	0.00914	0.00909	0.00933	0.00921	0.00908	0.00888	0.00873	0.00845	0.00831	0.00838	0.0082	0.00819	0.00819	0.00819	0.00818	0.00801	0.0079	0.00777	0.00764	0.00747	0.00745	0.00743	0.0075	0.00743	0.00739	0.00724	0.00713	0.0069	0.00666
2408.64	0.00914	0.00908	0.00933	0.00921	0.00907	0.00888	0.00873	0.00845	0.00831	0.00838	0.0082	0.0082	0.00819	0.00819	0.00818	0.00801	0.0079	0.00777	0.00764	0.00747	0.00745	0.00743	0.0075	0.00743	0.00739	0.00724	0.00713	0.0069	0.00666
2410.57	0.00914	0.00908	0.00932	0.00921	0.00907	0.00887	0.00873	0.00844	0.00831	0.00837	0.0082	0.00819	0.00819	0.00819	0.00818	0.00801	0.00789	0.00777	0.00763	0.00747	0.00745	0.00743	0.0075	0.00743	0.00739	0.00724	0.00713	0.00689	0.00665
2412.5	0.00914	0.00907	0.00932	0.0092	0.00907	0.00887	0.00873	0.00844	0.0083	0.00837	0.0082	0.00819	0.00818	0.00818	0.00818	0.00801	0.00789	0.00777	0.00763	0.00747	0.00745	0.00742	0.00749	0.00743	0.00738	0.00724	0.00713	0.00689	0.00665
2414.42	0.00913	0.00907	0.00932	0.0092	0.00906	0.00887	0.00873	0.00844	0.0083	0.00837	0.0082	0.00819	0.00818	0.00818	0.00818	0.008	0.00789	0.00776	0.00763	0.00747	0.00745	0.00742	0.00748	0.00742	0.00738	0.00724	0.00713	0.00689	0.00666
2416.35	0.00912	0.00907	0.00931	0.0092	0.00905	0.00887	0.00873	0.00843	0.0083	0.00837	0.0082	0.00818	0.00818	0.00818	0.00818	0.008	0.00789	0.00776	0.00763	0.00747	0.00745	0.00742	0.00748	0.00742	0.00738	0.00723	0.00713	0.00689	0.00666
2418.28	0.00912	0.00907	0.00931	0.00919	0.00905	0.00886	0.00872	0.00843	0.0083	0.00836	0.00819	0.00818	0.00818	0.00818	0.00818	0.00799	0.00789	0.00776	0.00762	0.00746	0.00745	0.00742	0.00748	0.00742	0.00738	0.00723	0.00713	0.0069	0.00666
2420.21	0.00911	0.00906	0.0093	0.00919	0.00905	0.00886	0.00872	0.00843	0.00829	0.00836	0.00819	0.00817	0.00818	0.00818	0.00818	0.00799	0.00789	0.00776	0.00762	0.00746	0.00745	0.00742	0.00749	0.00742	0.00738	0.00723	0.00713	0.0069	0.00666
2422.14	0.00911	0.00906	0.0093	0.00919	0.00905	0.00886	0.00871	0.00843	0.00829	0.00836	0.00819	0.00817	0.00818	0.00818	0.00817	0.00799	0.00788	0.00776	0.00762	0.00746	0.00745	0.00742	0.00749	0.00742	0.00738	0.00723	0.00713	0.0069	0.00666
2424.07	0.00911	0.00905	0.00929	0.00918	0.00904	0.00885	0.00871	0.00842	0.00828	0.00836	0.00819	0.00817	0.00817	0.00817	0.00817	0.00799	0.00788	0.00776	0.00763	0.00746	0.00744	0.00741	0.00748	0.00742	0.00738	0.00723	0.00713	0.0069	0.00666
2425.99	0.0091	0.00905	0.00929	0.00918	0.00904	0.00885	0.0087	0.00842	0.00828	0.00836	0.00819	0.00817	0.00817	0.00817	0.00816	0.00799	0.00788	0.00775	0.00763	0.00746	0.00744	0.00741	0.00748	0.00742	0.00738	0.00723	0.00713	0.0069	0.00666
2427.92	0.00909	0.00905	0.00929	0.00917	0.00903	0.00884	0.0087	0.00841	0.00828	0.00835	0.00819	0.00817	0.00816	0.00817	0.00816	0.00799	0.00788	0.00775	0.00762	0.00746	0.00743	0.00741	0.00748	0.00742	0.00738	0.00723	0.00713	0.00689	0.00666
2429.85	0.00909	0.00904	0.00928	0.00917	0.00903	0.00884	0.0087	0.00841	0.00828	0.00835	0.00819	0.00817	0.00816	0.00817	0.00816	0.00798	0.00788	0.00775	0.00762	0.00746	0.00743	0.00741	0.00748	0.00742	0.00737	0.00723	0.00713	0.00689	0.00666
2431.78	0.00909	0.00904	0.00928	0.00916	0.00903	0.00884	0.0087	0.00841	0.00828	0.00835	0.00818	0.00817	0.00817	0.00816	0.00815	0.00798	0.00788	0.00775	0.00761	0.00746	0.00743	0.00741	0.00748	0.00742	0.00737	0.00723	0.00712	0.00689	0.00666
2433.71	0.00908	0.00904	0.00927	0.00916	0.00902	0.00884	0.0087	0.0084	0.00828	0.00835	0.00818	0.00817	0.00817	0.00816	0.00815	0.00798	0.00788	0.00774	0.00761	0.00745	0.00744	0.00741	0.00748	0.00742	0.00737	0.00723	0.00712	0.00689	0.00666
2435.64	0.00909	0.00903	0.00927	0.00916	0.00902	0.00884	0.0087	0.0084	0.00828	0.00834	0.00818	0.00816	0.00816	0.00816	0.00816	0.00798	0.00788	0.00775	0.00761	0.00746	0.00744	0.00741	0.00748	0.00742	0.00737	0.00723	0.00712	0.00689	0.00666
2437.57	0.00909	0.00903	0.00927	0.00915	0.00903	0.00884	0.00869	0.0084	0.00828	0.00834	0.00818	0.00816	0.00816	0.00816	0.00816	0.00798	0.00788	0.00774	0.00762	0.00746	0.00744	0.00741	0.00748	0.00742	0.00737	0.00723	0.00712	0.0069	0.00666
2439.49	0.00908	0.00902	0.00927	0.00915	0.00903	0.00883	0.00869	0.0084	0.00828	0.00834	0.00818	0.00816	0.00816	0.00817	0.00816	0.00798	0.00788	0.00775	0.00762	0.00746	0.00743	0.00741	0.00748	0.00742	0.00737	0.00723	0.00712	0.0069	0.00666
2441.42	0.00907	0.00902	0.00927	0.00915	0.00902	0.00883	0.00869	0.0084	0.00827	0.00834	0.00818	0.00816	0.00816	0.00817	0.00816	0.00797	0.00788	0.00775	0.00762	0.00746	0.00743	0.00741	0.00748	0.00742	0.00738	0.00723	0.00713	0.0069	0.00667
2443.35	0.00907	0.00902	0.00926	0.00915	0.00901	0.00882	0.00868	0.0084	0.00827	0.00834	0.00818	0.00816	0.00816	0.00816	0.00816	0.00797	0.00787	0.00775	0.00761	0.00746	0.00743	0.00741	0.00748	0.00742	0.00738	0.00723	0.00713	0.00689	0.00667
2445.28	0.00906	0.00901	0.00926	0.00914	0.00901	0.00882	0.00868	0.0084	0.00826	0.00833	0.00817	0.00816	0.00815	0.00816	0.00815	0.00797	0.00787	0.00775	0.00761	0.00745	0.00743	0.00741	0.00748	0.00742	0.00738	0.00723	0.00712	0.00689	0.00667
2447.21	0.00906	0.00901	0.00926	0.00914	0.00901	0.00882	0.00867	0.0084	0.00826	0.00833	0.00816	0.00816	0.00815	0.00815	0.00815	0.00797	0.00787	0.00774	0.00761	0.00745	0.00743	0.00741	0.00747	0.00741	0.00737	0.00723	0.00712	0.00689	0.00667
2449.14	0.00906	0.00901	0.00926	0.00913	0.00901	0.00882	0.00867	0.0084	0.00826	0.00833	0.00816	0.00815	0.00815	0.00815	0.00815	0.00797	0.00786	0.00774	0.00761	0.00745	0.00743	0.00741	0.00747	0.00741	0.00737	0.00723	0.00712	0.00689	0.00666
2451.06	0.00906	0.009	0.00925	0.00913	0.009	0.00882	0.00867	0.00839	0.00826	0.00833	0.00816	0.00815	0.00815	0.00814	0.00815	0.00797	0.00786	0.00773	0.00761	0.00745	0.00743	0.00741	0.00747	0.00742	0.00737	0.00723	0.00712	0.0069	0.00666
2452.99	0.00906	0.009	0.00924	0.00913	0.009	0.00881	0.00867	0.00839	0.00825	0.00833	0.00816	0.00815	0.00815	0.00814	0.00815	0.00797	0.00787	0.00773	0.00761	0.00745	0.00743	0.00741	0.00747	0.00742	0.00738	0.00723	0.00712	0.0069	0.00666
2454.92	0.00905	0.00899	0.00923	0.00912	0.009	0.00881	0.00867	0.00838	0.00825	0.00832	0.00816	0.00814	0.00815	0.00814	0.00814	0.00797	0.00786	0.00773	0.00761	0.00745	0.00742	0.0074	0.00747	0.00742	0.00737	0.00723	0.00712	0.00689	0.00666
2456.85	0.00904	0.00899	0.00923	0.00912	0.00899	0.0088	0.00866	0.00838	0.00825	0.00832	0.00815	0.00814	0.00815	0.00814	0.00814	0.00796	0.00786	0.00773	0.0076	0.00745	0.00742	0.0074	0.00747	0.00742	0.00737	0.00722	0.00713	0.00689	0.00666
2458.78	0.00903	0.00898	0.00923	0.00911	0.00898	0.0088	0.00866	0.00837	0.00825	0.00832	0.00814	0.00814	0.00814	0.00814	0.00814	0.00796	0.00785	0.00773	0.0076	0.00745	0.00742	0.0074	0.00747	0.00741	0.00736	0.00722	0.00712	0.00689	0.00666
2460.71	0.00902	0.00898	0.00923	0.00911	0.00897	0.00879	0.00865	0.00837	0.00824	0.00832	0.00814	0.00814	0.00814	0.00813	0.00813	0.00796	0.00785	0.00773	0.0076	0.00744	0.00742	0.00739	0.00747	0.00741	0.00735	0.00722	0.00711	0.00689	0.00666
2462.63	0.00901	0.00897	0.00922	0.0091	0.00897	0.00878	0.00865	0.00836	0.00824	0.00831	0.00814	0.00813	0.00813	0.00813	0.00813	0.00795	0.00784	0.00772	0.0076	0.00743	0.00742	0.00739	0.00747	0.0074	0.00735	0.00722	0.00711	0.00688	0.00666
2464.56	0.009	0.00896	0.00921	0.00909	0.00896	0.00878	0.00864	0.00836	0.00823	0.0083	0.00813	0.00812	0.00813	0.00813	0.00813	0.00795	0.00783	0.00771	0.0076	0.00743	0.00742	0.00739	0.00746	0.0074	0.00736	0.00722	0.00711	0.00688	0.00666
2466.49	0.009	0.00895	0.00919	0.00909	0.00895	0.00877	0.00863	0.00835	0.00823	0.0083	0.00813	0.00812	0.00812	0.00813	0.00813	0.00794	0.00783	0.00771	0.00759	0.00743	0.00741	0.00738	0.00746	0.0074	0.00736	0.00721	0.00711	0.00688	0.00665
2468.42	0.00899	0.00895	0.00919	0.00909	0.00895	0.00877	0.00863	0.00835	0.00822	0.00829	0.00812	0.00812	0.00812	0.00812	0.00812	0.00794	0.00783	0.00771	0.00759	0.00742	0.0074	0.00738	0.00745	0.00739	0.00735	0.0072	0.00711	0.00688	0.00665
2470.35	0.00899	0.00894	0.00919	0.00908	0.00895	0.00877	0.00862	0.00835	0.00821	0.00829	0.00812	0.00811	0.00811	0.00812	0.00811	0.00793	0.00783	0.00771	0.00759	0.00742	0.0074	0.00738	0.00745	0.00739	0.00735	0.0072	0.00711	0.00688	0.00664
2472.28	0.00899	0.00894	0.00918	0.00907	0.00894	0.00876	0.00862	0.00834	0.00821	0.00828	0.00812	0.00811	0.00811	0.00812	0.00811	0.00793	0.00784	0.00771	0.00759	0.00742	0.00741	0.00739	0.00745	0.00739	0.00734	0.0072	0.0071	0.00688	0.00663
2474.21	0.00899	0.00893	0.00918	0.00907	0.00894	0.00876	0.00863	0.00834	0.0082	0.00828	0.00812	0.00811	0.00811	0.00811	0.00811	0.00793	0.00784	0.0077	0.00759	0.00742	0.0074	0.00739	0.00745	0.00739	0.00734	0.0072	0.0071	0.00688	0.00663
2476.13	0.00897	0.00892	0.00917	0.00907	0.00894	0.00875	0.00862	0.00834	0.0082	0.00828	0.00812	0.0081	0.0081	0.0081	0.0081	0.00793	0.00783	0.0077	0.00758	0.00742	0.0074	0.00738	0.00745	0.00739	0.00734	0.0072	0.0071	0.00688	0.00663
2478.06	0.00896	0.00891	0.00916	0.00907	0.00893	0.00874	0.00861	0.00833	0.0082	0.00827	0.00811	0.0081	0.0081	0.00809	0.0081	0.00792	0.00783	0.0077	0.00757	0.00741	0.0074	0.00738	0.00744	0.00738	0.00733	0.0072	0.0071	0.00687	0.00664
2479.99	0.00895	0.0089	0.00915	0.00906	0.00892	0.00873	0.0086	0.00832	0.00819	0.00827	0.0081	0.00809	0.00809	0.00808	0.0081	0.00792	0.00782	0.00769	0.00756	0.00741	0.00739	0.00737	0.00743	0.00738	0.00732	0.00719	0.00709	0.00687	0.00663
2481.92	0.00894	0.0089	0.00914	0.00905	0.00891	0.00873	0.00859	0.00831	0.00818	0.00826	0.00808	0.00809	0.00808	0.00807	0.00809	0.00792	0.00782	0.00768	0.00756	0.00741	0.00738	0.00736	0.00742	0.00737	0.00732	0.00718	0.00709	0.00686	0.00663
2483.85	0.00894	0.00889	0.00913	0.00903	0.0089	0.00872	0.00858	0.0083	0.00817	0.00825	0.00807	0.00808	0.00808	0.00807	0.00808	0.00792	0.00781	0.00767	0.00755	0.0074	0.00737	0.00735	0.00742	0.00737	0.00732	0.00718	0.00709	0.00685	0.00662
2485.78	0.00894	0.00888	0.00911	0.00902	0.00889	0.0087	0.00856	0.00829	0.00817	0.00825	0.00806	0.00807	0.00807	0.00806	0.00807	0.00791	0.0078	0.00767	0.00754	0.00739	0.00737	0.00735	0.00742	0.00737	0.00731	0.00717	0.00708	0.00685	0.00662
2487.7	0.00893	0.00888	0.0091	0.00901	0.00888	0.00869	0.00855	0.00828	0.00816	0.00823	0.00806	0.00805	0.00806	0.00806	0.00806	0.0079	0.0078	0.00767	0.00753	0.00738	0.00736	0.00734	0.00741	0.00736	0.0073	0.00717	0.00706	0.00684	0.00662
2489.63	0.00891	0.00887	0.00909	0.009	0.00887	0.00869	0.00855	0.00827	0.00815	0.00822	0.00806	0.00805	0.00805	0.00806	0.00805	0.00789	0.00779	0.00766	0.00753	0.00737	0.00735	0.00733	0.00741	0.00735	0.0073	0.00716	0.00704	0.00684	0.00661
2491.56	0.00889	0.00886	0.00909	0.00899	0.00886	0.00868	0.00854	0.00827	0.00813	0.0082	0.00806	0.00805	0.00804	0.00806	0.00805	0.00788	0.00778	0.00765	0.00753	0.00736	0.00734	0.00733	0.0074	0.00734	0.00729	0.00716	0.00704	0.00683	0.0066
2493.49	0.00887	0.00884	0.00907	0.00898	0.00886	0.00867	0.00852	0.00827	0.00813	0.0082	0.00805	0.00805	0.00804	0.00805	0.00804	0.00788	0.00778	0.00764	0.00753	0.00736	0.00734	0.00733	0.00739	0.00734	0.00729	0.00715	0.00705	0.00683	0.0066
2495.42	0.00885	0.00882	0.00907	0.00896	0.00885	0.00867	0.00851	0.00826	0.00813	0.00819	0.00804	0.00804	0.00804	0.00804	0.00804	0.00787	0.00777	0.00763	0.00752	0.00736	0.00733	0.00734	0.00739	0.00733	0.00728	0.00716	0.00705	0.00682	0.00659
2497.35	0.00885	0.00881	0.00906	0.00895	0.00885	0.00867	0.00851	0.00826	0.00813	0.00819	0.00804	0.00803	0.00804	0.00803	0.00803	0.00787	0.00777	0.00763	0.00751	0.00736	0.00733	0.00734	0.00739	0.00733	0.00728	0.00717	0.00706	0.00681	0.00658
2499.28	0.00885	0.0088	0.00907	0.00895	0.00886	0.00867	0.00852	0.00827	0.00812	0.00819	0.00805	0.00804	0.00804	0.00803	0.00803	0.00788	0.00777	0.00763	0.0075	0.00735	0.00734	0.00733	0.0074	0.00733	0.00728	0.00717	0.00706	0.00681	0.00659
2501.2	0.00884	0.0088	0.00908	0.00894	0.00886	0.00867	0.00853	0.00827	0.00812	0.0082	0.00806	0.00805	0.00803	0.00803	0.00803	0.0079	0.00778	0.00764	0.00749	0.00735	0.00735	0.00732	0.00739	0.00734	0.00729	0.00716	0.00706	0.00682	0.00661
2503.13	0.00884	0.00879	0.00907	0.00894	0.00885	0.00867	0.00853	0.00827	0.00812	0.00821	0.00807	0.00805	0.00803	0.00803	0.00804	0.0079	0.00779	0.00764	0.0075	0.00735	0.00735	0.00733	0.00739	0.00734	0.00729	0.00715	0.00706	0.00683	0.00662
2505.06	0.00884	0.00878	0.00907	0.00894	0.00884	0.00867	0.00853	0.00825	0.00813	0.00822	0.00807	0.00805	0.00803	0.00803	0.00804	0.0079	0.00779	0.00765	0.00752	0.00736	0.00735	0.00734	0.00738	0.00735	0.0073	0.00717	0.00706	0.00684	0.00661
2506.99	0.00886	0.00877	0.00906	0.00895	0.00883	0.00866	0.00852	0.00824	0.00812	0.00822	0.00807	0.00806	0.00804	0.00802	0.00804	0.00789	0.00778	0.00765	0.00752	0.00737	0.00735	0.00733	0.00738	0.00735	0.0073	0.00718	0.00706	0.00685	0.00661
2508.92	0.00886	0.00877	0.00904	0.00894	0.00882	0.00865	0.00853	0.00825	0.00813	0.00821	0.00806	0.00806	0.00804	0.00802	0.00805	0.0079	0.00778	0.00765	0.00753	0.00738	0.00735	0.00731	0.00739	0.00736	0.00731	0.00718	0.00707	0.00685	0.00662
2510.85	0.00885	0.00879	0.00904	0.00893	0.00882	0.00864	0.00853	0.00825	0.00813	0.00821	0.00805	0.00806	0.00803	0.00803	0.00806	0.00791	0.00778	0.00764	0.00754	0.00738	0.00736	0.0073	0.00739	0.00735	0.00731	0.00717	0.00706	0.00685	0.00662
2512.77	0.00885	0.0088	0.00903	0.00894	0.00883	0.00865	0.00853	0.00825	0.00813	0.0082	0.00804	0.00804	0.00803	0.00804	0.00805	0.00789	0.00777	0.00765	0.00753	0.00737	0.00735	0.00731	0.00739	0.00734	0.00731	0.00717	0.00705	0.00684	0.00662
2514.7	0.00884	0.00879	0.00904	0.00895	0.00884	0.00866	0.00852	0.00825	0.00812	0.00819	0.00803	0.00804	0.00803	0.00805	0.00804	0.00787	0.00776	0.00765	0.00752	0.00736	0.00735	0.00732	0.00739	0.00734	0.0073	0.00717	0.00705	0.00684	0.00661
2516.63	0.00883	0.00878	0.00904	0.00896	0.00883	0.00866	0.00852	0.00825	0.00811	0.00819	0.00803	0.00805	0.00803	0.00805	0.00803	0.00787	0.00778	0.00765	0.00751	0.00736	0.00735	0.00732	0.0074	0.00734	0.00729	0.00716	0.00706	0.00684	0.0066
2518.56	0.00882	0.00876	0.00904	0.00894	0.00883	0.00865	0.00852	0.00825	0.00811	0.00819	0.00804	0.00805	0.00802	0.00804	0.00802	0.00787	0.00779	0.00764	0.00751	0.00736	0.00736	0.00733	0.00741	0.00734	0.00728	0.00715	0.00707	0.00684	0.00659
2520.49	0.00881	0.00876	0.00903	0.00893	0.00883	0.00864	0.00851	0.00824	0.0081	0.00818	0.00804	0.00803	0.00802	0.00803	0.00802	0.00787	0.00778	0.00764	0.00751	0.00736	0.00735	0.00733	0.0074	0.00734	0.00728	0.00714	0.00707	0.00684	0.0066
2522.42	0.00881	0.00876	0.00902	0.00892	0.00882	0.00863	0.00851	0.00823	0.0081	0.00817	0.00803	0.00802	0.00801	0.00802	0.00801	0.00787	0.00777	0.00764	0.00752	0.00736	0.00735	0.00732	0.00739	0.00734	0.00729	0.00715	0.00706	0.00684	0.00661
2524.35	0.00881	0.00876	0.00902	0.00892	0.00881	0.00862	0.0085	0.00823	0.0081	0.00816	0.00803	0.00801	0.00801	0.00801	0.00801	0.00786	0.00776	0.00763	0.00752	0.00735	0.00734	0.00732	0.00739	0.00734	0.00729	0.00715	0.00705	0.00684	0.00662
2526.27	0.00881	0.00875	0.00901	0.00891	0.00879	0.00862	0.00849	0.00823	0.0081	0.00816	0.00802	0.00801	0.008	0.00801	0.00801	0.00785	0.00775	0.00763	0.00751	0.00735	0.00734	0.00732	0.00739	0.00733	0.00728	0.00714	0.00704	0.00683	0.00662
2528.2	0.0088	0.00874	0.009	0.0089	0.00878	0.00862	0.00848	0.00822	0.00809	0.00817	0.00801	0.00801	0.008	0.00801	0.00801	0.00785	0.00775	0.00762	0.00751	0.00735	0.00733	0.00732	0.00738	0.00733	0.00728	0.00714	0.00704	0.00683	0.00661
2530.13	0.00879	0.00874	0.009	0.00889	0.00877	0.00861	0.00848	0.00821	0.00809	0.00817	0.008	0.008	0.008	0.00801	0.00801	0.00785	0.00775	0.00762	0.0075	0.00734	0.00733	0.00731	0.00737	0.00732	0.00728	0.00714	0.00704	0.00683	0.0066
2532.06	0.00879	0.00874	0.00899	0.00889	0.00877	0.00861	0.00848	0.0082	0.00808	0.00816	0.008	0.00799	0.008	0.00801	0.00801	0.00784	0.00774	0.00762	0.0075	0.00734	0.00733	0.0073	0.00737	0.00731	0.00727	0.00714	0.00704	0.00683	0.0066
2533.99	0.00879	0.00873	0.00899	0.00889	0.00877	0.0086	0.00848	0.0082	0.00808	0.00816	0.008	0.00798	0.00799	0.008	0.008	0.00784	0.00773	0.00761	0.00749	0.00734	0.00733	0.0073	0.00736	0.00731	0.00727	0.00713	0.00704	0.00682	0.00661
2535.92	0.00878	0.00873	0.00898	0.00888	0.00877	0.0086	0.00847	0.00819	0.00807	0.00815	0.008	0.00798	0.00799	0.00799	0.00799	0.00784	0.00773	0.00761	0.00749	0.00733	0.00732	0.0073	0.00736	0.00731	0.00726	0.00713	0.00703	0.00683	0.0066
2537.84	0.00877	0.00873	0.00898	0.00888	0.00876	0.00859	0.00846	0.00819	0.00807	0.00814	0.00799	0.00798	0.00798	0.00799	0.00799	0.00783	0.00773	0.00761	0.00749	0.00733	0.00732	0.0073	0.00736	0.00731	0.00726	0.00713	0.00703	0.00683	0.0066
2539.77	0.00876	0.00872	0.00897	0.00888	0.00876	0.00859	0.00846	0.00818	0.00807	0.00814	0.00799	0.00798	0.00798	0.00799	0.00798	0.00783	0.00773	0.0076	0.00749	0.00733	0.00731	0.00729	0.00736	0.00731	0.00726	0.00712	0.00703	0.00682	0.0066
2541.7	0.00876	0.00872	0.00897	0.00888	0.00875	0.00859	0.00846	0.00818	0.00806	0.00814	0.00798	0.00798	0.00798	0.00798	0.00798	0.00782	0.00773	0.0076	0.00748	0.00732	0.00731	0.00729	0.00736	0.0073	0.00725	0.00712	0.00703	0.00681	0.00659
2543.63	0.00875	0.00871	0.00897	0.00888	0.00875	0.00859	0.00846	0.00818	0.00805	0.00814	0.00798	0.00798	0.00797	0.00798	0.00798	0.00782	0.00772	0.0076	0.00747	0.00732	0.0073	0.00729	0.00736	0.0073	0.00725	0.00712	0.00703	0.00681	0.0066
2545.56	0.00875	0.00871	0.00897	0.00887	0.00874	0.00858	0.00845	0.00818	0.00805	0.00813	0.00798	0.00798	0.00797	0.00797	0.00798	0.00782	0.00772	0.0076	0.00747	0.00732	0.0073	0.00728	0.00736	0.00729	0.00724	0.00712	0.00702	0.00681	0.0066
2547.49	0.00874	0.0087	0.00896	0.00886	0.00874	0.00858	0.00845	0.00817	0.00805	0.00813	0.00798	0.00797	0.00797	0.00797	0.00797	0.00782	0.00773	0.0076	0.00747	0.00732	0.0073	0.00728	0.00735	0.00729	0.00724	0.00712	0.00702	0.00681	0.0066
2549.42	0.00874	0.0087	0.00895	0.00885	0.00874	0.00857	0.00844	0.00817	0.00805	0.00812	0.00797	0.00797	0.00796	0.00797	0.00796	0.00781	0.00772	0.00759	0.00747	0.00732	0.0073	0.00728	0.00735	0.00729	0.00725	0.00711	0.00702	0.00681	0.0066
2551.34	0.00874	0.00869	0.00895	0.00884	0.00873	0.00856	0.00843	0.00816	0.00804	0.00812	0.00797	0.00796	0.00796	0.00797	0.00796	0.0078	0.00772	0.00759	0.00746	0.00731	0.0073	0.00728	0.00735	0.00728	0.00725	0.00711	0.00702	0.00681	0.00659
2553.27	0.00873	0.00869	0.00894	0.00884	0.00872	0.00856	0.00843	0.00815	0.00803	0.00811	0.00796	0.00795	0.00795	0.00796	0.00796	0.0078	0.00771	0.00759	0.00746	0.00731	0.00729	0.00727	0.00734	0.00728	0.00724	0.00711	0.00702	0.00681	0.00659
2555.2	0.00873	0.00868	0.00894	0.00884	0.00871	0.00855	0.00842	0.00815	0.00803	0.00811	0.00796	0.00794	0.00795	0.00796	0.00796	0.0078	0.0077	0.00758	0.00745	0.0073	0.00729	0.00727	0.00734	0.00728	0.00724	0.0071	0.00701	0.0068	0.00658
2557.13	0.00873	0.00868	0.00893	0.00883	0.00871	0.00855	0.00842	0.00814	0.00802	0.00811	0.00795	0.00794	0.00795	0.00795	0.00795	0.0078	0.0077	0.00758	0.00745	0.0073	0.00729	0.00727	0.00733	0.00728	0.00723	0.0071	0.00701	0.0068	0.00658
2559.06	0.00872	0.00867	0.00893	0.00882	0.00871	0.00854	0.00841	0.00814	0.00801	0.0081	0.00794	0.00794	0.00794	0.00795	0.00794	0.00779	0.00769	0.00757	0.00745	0.00729	0.00729	0.00726	0.00733	0.00728	0.00723	0.00709	0.00701	0.00679	0.00658
2560.99	0.00872	0.00867	0.00892	0.00881	0.0087	0.00853	0.0084	0.00813	0.00801	0.0081	0.00794	0.00794	0.00793	0.00795	0.00794	0.00779	0.00769	0.00756	0.00745	0.00729	0.00729	0.00726	0.00733	0.00728	0.00722	0.00709	0.00701	0.00679	0.00657
2562.91	0.00871	0.00866	0.00892	0.00881	0.0087	0.00853	0.0084	0.00813	0.008	0.0081	0.00793	0.00793	0.00793	0.00794	0.00794	0.00778	0.00769	0.00756	0.00744	0.00729	0.00728	0.00726	0.00733	0.00727	0.00722	0.00709	0.00701	0.00679	0.00657
2564.84	0.00871	0.00865	0.00891	0.0088	0.00869	0.00852	0.0084	0.00813	0.008	0.00809	0.00793	0.00792	0.00793	0.00794	0.00794	0.00778	0.00769	0.00756	0.00744	0.00729	0.00727	0.00726	0.00733	0.00727	0.00722	0.00709	0.007	0.00679	0.00657
2566.77	0.0087	0.00865	0.0089	0.0088	0.00868	0.00851	0.00839	0.00812	0.008	0.00808	0.00792	0.00792	0.00793	0.00794	0.00793	0.00778	0.00768	0.00756	0.00745	0.00729	0.00727	0.00726	0.00733	0.00727	0.00722	0.00708	0.007	0.00678	0.00657
2568.7	0.0087	0.00864	0.00889	0.0088	0.00867	0.00851	0.00839	0.00812	0.00799	0.00808	0.00792	0.00792	0.00792	0.00793	0.00793	0.00778	0.00768	0.00755	0.00744	0.00729	0.00727	0.00725	0.00732	0.00727	0.00722	0.00708	0.007	0.00678	0.00657
2570.63	0.00869	0.00864	0.00889	0.00879	0.00867	0.00851	0.00838	0.00811	0.00799	0.00807	0.00792	0.00791	0.00791	0.00792	0.00792	0.00777	0.00767	0.00755	0.00743	0.00728	0.00727	0.00725	0.00732	0.00727	0.00722	0.00708	0.007	0.00678	0.00657
2572.56	0.00868	0.00864	0.00889	0.00879	0.00866	0.0085	0.00838	0.00811	0.00798	0.00807	0.00791	0.0079	0.00791	0.00792	0.00792	0.00777	0.00767	0.00754	0.00743	0.00728	0.00727	0.00724	0.00731	0.00726	0.00722	0.00708	0.00699	0.00678	0.00657
2574.49	0.00867	0.00863	0.00888	0.00878	0.00866	0.0085	0.00837	0.0081	0.00798	0.00807	0.00791	0.0079	0.00791	0.00791	0.00792	0.00776	0.00766	0.00754	0.00743	0.00727	0.00726	0.00724	0.00731	0.00725	0.00721	0.00707	0.00698	0.00678	0.00657
2576.41	0.00867	0.00863	0.00887	0.00877	0.00865	0.00849	0.00837	0.0081	0.00797	0.00806	0.0079	0.0079	0.0079	0.00791	0.00791	0.00775	0.00766	0.00754	0.00742	0.00726	0.00726	0.00724	0.00731	0.00725	0.0072	0.00707	0.00698	0.00678	0.00656
2578.34	0.00866	0.00862	0.00887	0.00876	0.00865	0.00849	0.00836	0.00809	0.00797	0.00805	0.0079	0.0079	0.0079	0.0079	0.00791	0.00775	0.00766	0.00753	0.00742	0.00726	0.00726	0.00723	0.0073	0.00725	0.00719	0.00707	0.00698	0.00677	0.00656
2580.27	0.00866	0.00861	0.00886	0.00876	0.00864	0.00848	0.00836	0.00809	0.00797	0.00805	0.0079	0.00789	0.0079	0.00789	0.0079	0.00775	0.00765	0.00753	0.00741	0.00725	0.00725	0.00723	0.0073	0.00724	0.00718	0.00706	0.00698	0.00676	0.00656
2582.2	0.00865	0.0086	0.00886	0.00875	0.00863	0.00848	0.00835	0.00808	0.00796	0.00804	0.00789	0.00788	0.00789	0.00789	0.0079	0.00775	0.00765	0.00753	0.00741	0.00725	0.00725	0.00722	0.0073	0.00724	0.00718	0.00706	0.00698	0.00676	0.00655
2584.13	0.00865	0.0086	0.00885	0.00875	0.00863	0.00847	0.00835	0.00808	0.00795	0.00804	0.00788	0.00788	0.00789	0.00788	0.0079	0.00774	0.00764	0.00752	0.0074	0.00725	0.00724	0.00722	0.00729	0.00724	0.00719	0.00706	0.00698	0.00676	0.00655
2586.06	0.00864	0.00859	0.00884	0.00875	0.00862	0.00846	0.00834	0.00807	0.00794	0.00804	0.00788	0.00788	0.00789	0.00788	0.00789	0.00774	0.00764	0.00752	0.0074	0.00725	0.00724	0.00722	0.00729	0.00723	0.00719	0.00705	0.00697	0.00676	0.00655
2587.98	0.00864	0.00859	0.00883	0.00874	0.00862	0.00845	0.00834	0.00807	0.00794	0.00803	0.00787	0.00787	0.00788	0.00788	0.00788	0.00773	0.00764	0.00752	0.00739	0.00724	0.00723	0.00721	0.00729	0.00723	0.00719	0.00705	0.00697	0.00676	0.00655
2589.91	0.00862	0.00859	0.00882	0.00873	0.00861	0.00845	0.00833	0.00806	0.00794	0.00802	0.00786	0.00787	0.00787	0.00788	0.00787	0.00773	0.00763	0.00751	0.00739	0.00724	0.00723	0.00721	0.00728	0.00722	0.00718	0.00705	0.00697	0.00676	0.00655
2591.84	0.00861	0.00858	0.00881	0.00872	0.00861	0.00844	0.00832	0.00806	0.00793	0.00802	0.00785	0.00786	0.00786	0.00788	0.00787	0.00772	0.00763	0.0075	0.00738	0.00724	0.00723	0.00721	0.00727	0.00722	0.00718	0.00705	0.00696	0.00675	0.00655
2593.77	0.0086	0.00857	0.00881	0.00871	0.0086	0.00844	0.00832	0.00805	0.00793	0.00801	0.00785	0.00785	0.00786	0.00787	0.00787	0.00771	0.00763	0.00749	0.00738	0.00723	0.00722	0.00721	0.00727	0.00721	0.00717	0.00705	0.00695	0.00675	0.00654
2595.7	0.0086	0.00855	0.0088	0.0087	0.00859	0.00843	0.00831	0.00804	0.00792	0.008	0.00784	0.00785	0.00786	0.00786	0.00786	0.00771	0.00762	0.0075	0.00738	0.00722	0.00721	0.0072	0.00727	0.0072	0.00717	0.00705	0.00695	0.00674	0.00654
2597.63	0.0086	0.00854	0.00879	0.00869	0.00859	0.00843	0.00831	0.00804	0.00792	0.00799	0.00785	0.00785	0.00786	0.00786	0.00785	0.00771	0.00761	0.00749	0.00738	0.00722	0.00721	0.00719	0.00727	0.0072	0.00716	0.00704	0.00695	0.00674	0.00653
2599.56	0.00859	0.00854	0.00879	0.00869	0.00858	0.00842	0.0083	0.00803	0.00792	0.00799	0.00785	0.00785	0.00785	0.00785	0.00785	0.0077	0.00761	0.00749	0.00738	0.00722	0.00721	0.00719	0.00727	0.0072	0.00716	0.00704	0.00695	0.00675	0.00653
2601.48	0.00859	0.00854	0.00879	0.00869	0.00858	0.00841	0.0083	0.00803	0.00791	0.00799	0.00785	0.00785	0.00785	0.00785	0.00785	0.00771	0.00761	0.00749	0.00738	0.00722	0.00721	0.00718	0.00726	0.0072	0.00715	0.00703	0.00695	0.00675	0.00652
2603.41	0.00858	0.00854	0.00878	0.00869	0.00857	0.00841	0.0083	0.00803	0.00791	0.00799	0.00785	0.00784	0.00785	0.00784	0.00785	0.00771	0.00761	0.00749	0.00737	0.00721	0.0072	0.00718	0.00726	0.0072	0.00715	0.00703	0.00694	0.00674	0.00653
2605.34	0.00857	0.00853	0.00878	0.00869	0.00857	0.00841	0.00829	0.00802	0.00791	0.00799	0.00784	0.00784	0.00784	0.00785	0.00784	0.0077	0.0076	0.00748	0.00736	0.00721	0.00719	0.00718	0.00726	0.0072	0.00715	0.00702	0.00694	0.00673	0.00653
2607.27	0.00857	0.00852	0.00878	0.00868	0.00856	0.00841	0.00829	0.00802	0.0079	0.00799	0.00784	0.00783	0.00784	0.00784	0.00784	0.00769	0.0076	0.00748	0.00736	0.00722	0.00719	0.00718	0.00726	0.0072	0.00715	0.00702	0.00694	0.00673	0.00653
2609.2	0.00856	0.00852	0.00877	0.00867	0.00856	0.0084	0.00828	0.00801	0.00789	0.00799	0.00783	0.00782	0.00784	0.00784	0.00783	0.00769	0.0076	0.00747	0.00736	0.00722	0.00719	0.00718	0.00725	0.00719	0.00715	0.00703	0.00694	0.00673	0.00653
2611.13	0.00856	0.00852	0.00876	0.00866	0.00855	0.0084	0.00827	0.008	0.00789	0.00798	0.00783	0.00782	0.00783	0.00783	0.00783	0.00768	0.0076	0.00747	0.00736	0.00721	0.00719	0.00718	0.00725	0.00718	0.00714	0.00702	0.00694	0.00672	0.00653
2613.05	0.00855	0.00851	0.00875	0.00865	0.00855	0.00839	0.00827	0.008	0.00788	0.00797	0.00782	0.00782	0.00783	0.00783	0.00783	0.00768	0.00759	0.00747	0.00736	0.00721	0.00719	0.00717	0.00725	0.00718	0.00714	0.00702	0.00694	0.00672	0.00653
2614.98	0.00855	0.00851	0.00875	0.00865	0.00854	0.00838	0.00827	0.00799	0.00788	0.00797	0.00781	0.00782	0.00782	0.00783	0.00782	0.00767	0.00759	0.00747	0.00736	0.0072	0.00718	0.00717	0.00724	0.00718	0.00714	0.00702	0.00694	0.00672	0.00652
2616.91	0.00855	0.0085	0.00875	0.00865	0.00853	0.00838	0.00826	0.00799	0.00788	0.00797	0.00781	0.00782	0.00782	0.00782	0.00782	0.00767	0.00759	0.00747	0.00735	0.0072	0.00718	0.00717	0.00724	0.00718	0.00714	0.00701	0.00693	0.00672	0.00652
2618.84	0.00854	0.00849	0.00875	0.00865	0.00853	0.00838	0.00826	0.00799	0.00787	0.00797	0.0078	0.00781	0.00781	0.00781	0.00782	0.00766	0.00758	0.00746	0.00735	0.0072	0.00718	0.00717	0.00724	0.00718	0.00714	0.00701	0.00693	0.00672	0.00652
2620.77	0.00853	0.00849	0.00874	0.00864	0.00853	0.00838	0.00825	0.00798	0.00787	0.00796	0.0078	0.0078	0.00781	0.00781	0.00781	0.00766	0.00758	0.00745	0.00734	0.0072	0.00718	0.00716	0.00724	0.00718	0.00714	0.00701	0.00692	0.00672	0.00652
2622.7	0.00852	0.00848	0.00874	0.00863	0.00853	0.00837	0.00825	0.00798	0.00786	0.00795	0.00779	0.0078	0.0078	0.00781	0.0078	0.00766	0.00757	0.00745	0.00733	0.00719	0.00718	0.00716	0.00724	0.00717	0.00713	0.00701	0.00692	0.00671	0.00652
2624.63	0.00852	0.00847	0.00873	0.00863	0.00852	0.00836	0.00824	0.00797	0.00786	0.00794	0.00779	0.00779	0.0078	0.0078	0.0078	0.00765	0.00757	0.00745	0.00733	0.00719	0.00717	0.00715	0.00723	0.00717	0.00713	0.007	0.00692	0.00671	0.00652
2626.55	0.00851	0.00847	0.00872	0.00862	0.00851	0.00835	0.00824	0.00797	0.00785	0.00794	0.00778	0.00779	0.0078	0.0078	0.0078	0.00765	0.00757	0.00744	0.00732	0.00718	0.00717	0.00715	0.00722	0.00717	0.00712	0.007	0.00691	0.00671	0.00651
2628.48	0.0085	0.00846	0.00871	0.00861	0.0085	0.00834	0.00823	0.00796	0.00784	0.00793	0.00778	0.00778	0.0078	0.00779	0.0078	0.00765	0.00756	0.00743	0.00732	0.00718	0.00716	0.00714	0.00722	0.00717	0.00712	0.007	0.00691	0.00671	0.00651
2630.41	0.0085	0.00845	0.00871	0.00861	0.00849	0.00834	0.00822	0.00796	0.00784	0.00793	0.00777	0.00778	0.00779	0.00779	0.00779	0.00764	0.00756	0.00743	0.00732	0.00717	0.00716	0.00714	0.00721	0.00716	0.00711	0.00699	0.0069	0.00671	0.0065
2632.34	0.00849	0.00845	0.0087	0.0086	0.00848	0.00834	0.00821	0.00795	0.00783	0.00792	0.00777	0.00778	0.00778	0.00778	0.00779	0.00764	0.00755	0.00743	0.00731	0.00716	0.00715	0.00713	0.00721	0.00716	0.00711	0.00699	0.0069	0.0067	0.0065
2634.27	0.00848	0.00844	0.00869	0.00859	0.00848	0.00833	0.0082	0.00795	0.00783	0.00792	0.00777	0.00777	0.00778	0.00778	0.00778	0.00763	0.00755	0.00742	0.00731	0.00716	0.00715	0.00713	0.0072	0.00715	0.0071	0.00699	0.0069	0.0067	0.0065
2636.2	0.00847	0.00843	0.00868	0.00858	0.00847	0.00832	0.0082	0.00794	0.00783	0.00791	0.00776	0.00776	0.00777	0.00777	0.00777	0.00762	0.00754	0.00742	0.00731	0.00716	0.00715	0.00713	0.0072	0.00715	0.0071	0.00698	0.0069	0.0067	0.00649
2638.12	0.00846	0.00842	0.00867	0.00857	0.00846	0.00831	0.00819	0.00793	0.00782	0.0079	0.00776	0.00775	0.00776	0.00776	0.00776	0.00762	0.00753	0.00741	0.0073	0.00716	0.00714	0.00712	0.00719	0.00714	0.0071	0.00697	0.00689	0.00669	0.00649
2640.05	0.00845	0.00841	0.00866	0.00856	0.00845	0.0083	0.00818	0.00792	0.00781	0.00789	0.00775	0.00774	0.00776	0.00776	0.00776	0.00762	0.00752	0.00741	0.0073	0.00715	0.00713	0.00712	0.00719	0.00714	0.0071	0.00697	0.00689	0.00669	0.00649
2641.98	0.00845	0.0084	0.00865	0.00855	0.00845	0.00829	0.00817	0.00792	0.0078	0.00789	0.00774	0.00773	0.00775	0.00775	0.00775	0.00761	0.00752	0.00741	0.00729	0.00714	0.00713	0.00711	0.00719	0.00713	0.00709	0.00696	0.00688	0.00668	0.00648
2643.91	0.00844	0.00839	0.00863	0.00854	0.00844	0.00829	0.00817	0.00791	0.0078	0.00788	0.00773	0.00773	0.00774	0.00775	0.00775	0.0076	0.00752	0.0074	0.00728	0.00714	0.00713	0.00711	0.00718	0.00713	0.00709	0.00696	0.00687	0.00668	0.00648
2645.84	0.00842	0.00838	0.00862	0.00854	0.00843	0.00828	0.00816	0.0079	0.00779	0.00787	0.00772	0.00772	0.00773	0.00774	0.00774	0.0076	0.00751	0.0074	0.00727	0.00713	0.00712	0.0071	0.00718	0.00712	0.00708	0.00696	0.00687	0.00668	0.00648
2647.77	0.00841	0.00837	0.00861	0.00853	0.00841	0.00827	0.00815	0.00789	0.00778	0.00787	0.00772	0.00772	0.00772	0.00773	0.00773	0.00759	0.00751	0.00739	0.00727	0.00713	0.00712	0.0071	0.00717	0.00711	0.00707	0.00695	0.00686	0.00667	0.00647
2649.69	0.0084	0.00836	0.00861	0.00851	0.00841	0.00826	0.00814	0.00788	0.00777	0.00786	0.00771	0.00771	0.00772	0.00772	0.00773	0.00759	0.0075	0.00738	0.00727	0.00712	0.00711	0.00709	0.00716	0.00711	0.00707	0.00695	0.00686	0.00666	0.00646
2651.62	0.00839	0.00835	0.0086	0.0085	0.0084	0.00825	0.00813	0.00788	0.00777	0.00785	0.0077	0.0077	0.00771	0.00772	0.00772	0.00758	0.00749	0.00738	0.00726	0.00711	0.00711	0.00709	0.00716	0.0071	0.00706	0.00694	0.00685	0.00666	0.00646
2653.55	0.00837	0.00834	0.00859	0.00849	0.00839	0.00824	0.00813	0.00787	0.00776	0.00784	0.0077	0.0077	0.00771	0.00771	0.00771	0.00757	0.00749	0.00737	0.00726	0.00711	0.0071	0.00708	0.00715	0.0071	0.00706	0.00693	0.00685	0.00665	0.00646
2655.48	0.00836	0.00833	0.00859	0.00848	0.00838	0.00823	0.00812	0.00786	0.00775	0.00783	0.00769	0.00769	0.0077	0.0077	0.00771	0.00756	0.00748	0.00736	0.00726	0.0071	0.00709	0.00707	0.00715	0.00709	0.00705	0.00693	0.00684	0.00665	0.00645
2657.41	0.00835	0.00832	0.00858	0.00848	0.00838	0.00823	0.00812	0.00786	0.00775	0.00783	0.00769	0.00769	0.0077	0.0077	0.0077	0.00756	0.00748	0.00736	0.00725	0.0071	0.00709	0.00707	0.00714	0.00709	0.00705	0.00692	0.00684	0.00664	0.00645
2659.34	0.00834	0.00831	0.00857	0.00847	0.00837	0.00823	0.00811	0.00785	0.00774	0.00783	0.00768	0.00768	0.00769	0.0077	0.0077	0.00756	0.00747	0.00735	0.00725	0.0071	0.00709	0.00707	0.00714	0.00709	0.00704	0.00692	0.00684	0.00664	0.00645
2661.27	0.00834	0.00831	0.00856	0.00847	0.00837	0.00822	0.00811	0.00785	0.00774	0.00783	0.00768	0.00768	0.00769	0.00769	0.0077	0.00756	0.00747	0.00735	0.00725	0.0071	0.00708	0.00707	0.00714	0.00709	0.00704	0.00692	0.00684	0.00665	0.00645
2663.19	0.00834	0.0083	0.00855	0.00847	0.00837	0.00821	0.0081	0.00785	0.00773	0.00783	0.00767	0.00768	0.00769	0.00769	0.00769	0.00755	0.00747	0.00735	0.00724	0.0071	0.00708	0.00706	0.00714	0.00709	0.00704	0.00693	0.00684	0.00665	0.00645
2665.12	0.00833	0.00829	0.00855	0.00846	0.00836	0.00821	0.0081	0.00784	0.00773	0.00782	0.00767	0.00768	0.00768	0.00769	0.00769	0.00755	0.00747	0.00735	0.00724	0.00709	0.00708	0.00706	0.00714	0.00709	0.00704	0.00692	0.00684	0.00664	0.00645
2667.05	0.00833	0.00829	0.00854	0.00845	0.00836	0.00821	0.0081	0.00784	0.00773	0.00782	0.00767	0.00767	0.00768	0.00768	0.00769	0.00755	0.00747	0.00735	0.00724	0.00709	0.00707	0.00706	0.00713	0.00709	0.00704	0.00692	0.00683	0.00664	0.00645
2668.98	0.00831	0.00828	0.00853	0.00845	0.00835	0.00821	0.00809	0.00783	0.00772	0.00781	0.00767	0.00767	0.00767	0.00768	0.00769	0.00755	0.00747	0.00735	0.00724	0.00708	0.00707	0.00706	0.00713	0.00708	0.00704	0.00692	0.00683	0.00664	0.00645
2670.91	0.0083	0.00827	0.00853	0.00844	0.00834	0.0082	0.00809	0.00783	0.00772	0.00781	0.00766	0.00767	0.00767	0.00768	0.00768	0.00754	0.00746	0.00735	0.00724	0.00708	0.00707	0.00706	0.00713	0.00708	0.00704	0.00692	0.00683	0.00664	0.00644
2672.84	0.00829	0.00826	0.00853	0.00844	0.00834	0.0082	0.00809	0.00783	0.00771	0.00781	0.00766	0.00767	0.00767	0.00768	0.00768	0.00754	0.00746	0.00734	0.00724	0.00708	0.00707	0.00705	0.00713	0.00708	0.00704	0.00691	0.00683	0.00664	0.00644
2674.76	0.00828	0.00825	0.00852	0.00843	0.00833	0.00819	0.00808	0.00782	0.00771	0.0078	0.00765	0.00766	0.00767	0.00768	0.00768	0.00754	0.00746	0.00734	0.00723	0.00708	0.00707	0.00705	0.00713	0.00707	0.00703	0.00691	0.00683	0.00663	0.00644
2676.69	0.00828	0.00824	0.00851	0.00842	0.00833	0.00818	0.00807	0.00782	0.00771	0.0078	0.00765	0.00766	0.00766	0.00767	0.00767	0.00753	0.00745	0.00734	0.00723	0.00708	0.00707	0.00705	0.00712	0.00707	0.00703	0.00691	0.00683	0.00663	0.00644
2678.62	0.00827	0.00823	0.0085	0.00842	0.00832	0.00818	0.00807	0.00782	0.0077	0.00779	0.00764	0.00766	0.00766	0.00767	0.00767	0.00753	0.00745	0.00734	0.00722	0.00708	0.00706	0.00705	0.00712	0.00707	0.00702	0.0069	0.00682	0.00663	0.00644
2680.55	0.00825	0.00822	0.00849	0.00841	0.00831	0.00817	0.00806	0.00781	0.0077	0.00778	0.00764	0.00765	0.00765	0.00766	0.00767	0.00752	0.00745	0.00733	0.00722	0.00707	0.00706	0.00704	0.00712	0.00707	0.00702	0.0069	0.00682	0.00662	0.00643
2682.48	0.00824	0.0082	0.00848	0.0084	0.0083	0.00816	0.00806	0.0078	0.0077	0.00778	0.00764	0.00764	0.00765	0.00766	0.00766	0.00752	0.00744	0.00732	0.00721	0.00707	0.00705	0.00704	0.00711	0.00706	0.00701	0.0069	0.00681	0.00662	0.00643
2684.41	0.00822	0.00819	0.00846	0.00839	0.00829	0.00816	0.00805	0.00779	0.00769	0.00777	0.00763	0.00763	0.00764	0.00765	0.00765	0.00752	0.00744	0.00732	0.00721	0.00706	0.00705	0.00703	0.00711	0.00706	0.00701	0.0069	0.00681	0.00662	0.00643
2686.34	0.0082	0.00818	0.00845	0.00838	0.00829	0.00815	0.00804	0.00779	0.00768	0.00777	0.00763	0.00763	0.00764	0.00765	0.00765	0.00751	0.00743	0.00732	0.00721	0.00706	0.00704	0.00703	0.0071	0.00706	0.00701	0.00689	0.00681	0.00661	0.00642
2688.26	0.00818	0.00816	0.00844	0.00837	0.00827	0.00814	0.00803	0.00778	0.00767	0.00776	0.00762	0.00762	0.00763	0.00764	0.00764	0.00751	0.00742	0.00731	0.00721	0.00706	0.00704	0.00703	0.0071	0.00705	0.007	0.00688	0.0068	0.00661	0.00642
2690.19	0.00816	0.00814	0.00843	0.00836	0.00826	0.00813	0.00802	0.00777	0.00766	0.00775	0.00761	0.00762	0.00763	0.00764	0.00764	0.0075	0.00742	0.00731	0.0072	0.00705	0.00704	0.00702	0.0071	0.00705	0.007	0.00688	0.0068	0.00661	0.00642
2692.12	0.00814	0.00813	0.00841	0.00835	0.00825	0.00812	0.00802	0.00777	0.00765	0.00775	0.00761	0.00761	0.00762	0.00763	0.00763	0.0075	0.00741	0.0073	0.00719	0.00704	0.00704	0.00702	0.00709	0.00704	0.00699	0.00688	0.0068	0.00661	0.00641
2694.05	0.00813	0.00812	0.0084	0.00834	0.00824	0.00811	0.00801	0.00776	0.00764	0.00774	0.0076	0.00761	0.00762	0.00763	0.00762	0.00749	0.0074	0.0073	0.00718	0.00704	0.00703	0.00701	0.00709	0.00704	0.00699	0.00687	0.00679	0.0066	0.00641
2695.98	0.00812	0.00811	0.00839	0.00833	0.00824	0.00811	0.008	0.00775	0.00764	0.00774	0.00759	0.0076	0.00761	0.00762	0.00762	0.00749	0.0074	0.00729	0.00718	0.00704	0.00702	0.00701	0.00708	0.00703	0.00698	0.00687	0.00679	0.00659	0.0064
2697.91	0.00812	0.0081	0.00838	0.00832	0.00823	0.0081	0.00799	0.00774	0.00763	0.00773	0.00758	0.00759	0.0076	0.00761	0.00761	0.00748	0.00739	0.00728	0.00717	0.00703	0.00702	0.007	0.00708	0.00702	0.00698	0.00686	0.00678	0.00659	0.0064
2699.83	0.00811	0.00809	0.00838	0.00831	0.00822	0.00809	0.00799	0.00774	0.00763	0.00772	0.00758	0.00758	0.00759	0.0076	0.00761	0.00747	0.00739	0.00727	0.00717	0.00702	0.00701	0.00699	0.00707	0.00702	0.00697	0.00686	0.00677	0.00659	0.0064
2701.76	0.00811	0.00809	0.00838	0.0083	0.00822	0.00808	0.00798	0.00773	0.00762	0.00772	0.00757	0.00758	0.00759	0.00759	0.0076	0.00746	0.00738	0.00727	0.00716	0.00701	0.007	0.00699	0.00707	0.00701	0.00697	0.00685	0.00677	0.00658	0.00639
2703.69	0.00811	0.0081	0.00837	0.0083	0.00821	0.00808	0.00797	0.00772	0.00761	0.00771	0.00757	0.00757	0.00758	0.00759	0.00759	0.00746	0.00738	0.00726	0.00715	0.00701	0.007	0.00698	0.00706	0.00701	0.00696	0.00685	0.00676	0.00658	0.00639
2705.62	0.00812	0.0081	0.00837	0.0083	0.00821	0.00807	0.00797	0.00771	0.0076	0.0077	0.00756	0.00757	0.00757	0.00758	0.00759	0.00745	0.00737	0.00725	0.00715	0.007	0.007	0.00698	0.00705	0.007	0.00696	0.00684	0.00676	0.00658	0.00639
2707.55	0.00813	0.00811	0.00837	0.0083	0.0082	0.00807	0.00796	0.00771	0.0076	0.00769	0.00755	0.00756	0.00756	0.00758	0.00758	0.00744	0.00736	0.00725	0.00714	0.007	0.00699	0.00697	0.00705	0.007	0.00695	0.00684	0.00676	0.00657	0.00638
2709.48	0.00814	0.00811	0.00837	0.00829	0.0082	0.00806	0.00795	0.0077	0.00759	0.00769	0.00755	0.00755	0.00756	0.00757	0.00757	0.00744	0.00735	0.00724	0.00713	0.00699	0.00698	0.00697	0.00704	0.00699	0.00694	0.00683	0.00675	0.00657	0.00638
2711.41	0.00814	0.00811	0.00837	0.00828	0.00819	0.00806	0.00795	0.0077	0.00759	0.00768	0.00754	0.00755	0.00755	0.00756	0.00756	0.00743	0.00735	0.00724	0.00713	0.00698	0.00698	0.00696	0.00703	0.00699	0.00694	0.00683	0.00675	0.00656	0.00637
2713.33	0.00813	0.0081	0.00836	0.00828	0.00819	0.00805	0.00794	0.00769	0.00758	0.00767	0.00753	0.00754	0.00755	0.00756	0.00756	0.00743	0.00734	0.00723	0.00712	0.00698	0.00697	0.00696	0.00703	0.00698	0.00694	0.00682	0.00674	0.00655	0.00636
2715.26	0.00813	0.0081	0.00835	0.00827	0.00818	0.00804	0.00793	0.00769	0.00757	0.00767	0.00753	0.00753	0.00755	0.00755	0.00755	0.00742	0.00734	0.00723	0.00711	0.00697	0.00697	0.00695	0.00702	0.00698	0.00693	0.00681	0.00674	0.00655	0.00636
2717.19	0.00814	0.0081	0.00835	0.00827	0.00817	0.00803	0.00792	0.00768	0.00757	0.00766	0.00752	0.00752	0.00754	0.00754	0.00755	0.00741	0.00733	0.00722	0.00711	0.00697	0.00696	0.00694	0.00701	0.00697	0.00693	0.00681	0.00673	0.00654	0.00636
2719.12	0.00814	0.0081	0.00835	0.00826	0.00817	0.00803	0.00792	0.00767	0.00756	0.00766	0.00751	0.00752	0.00753	0.00754	0.00754	0.0074	0.00733	0.00721	0.0071	0.00696	0.00695	0.00694	0.00701	0.00696	0.00692	0.0068	0.00672	0.00654	0.00635
2721.05	0.00815	0.00811	0.00835	0.00826	0.00816	0.00802	0.00792	0.00766	0.00755	0.00765	0.00751	0.00751	0.00752	0.00753	0.00753	0.00739	0.00732	0.0072	0.0071	0.00695	0.00695	0.00693	0.00701	0.00696	0.00691	0.0068	0.00672	0.00653	0.00635
2722.98	0.00815	0.00811	0.00835	0.00826	0.00815	0.00802	0.00791	0.00766	0.00755	0.00764	0.0075	0.00751	0.00752	0.00752	0.00752	0.00739	0.00732	0.0072	0.00709	0.00695	0.00694	0.00693	0.007	0.00695	0.0069	0.00679	0.00671	0.00653	0.00635
2724.9	0.00815	0.0081	0.00834	0.00825	0.00815	0.00801	0.0079	0.00765	0.00754	0.00763	0.00749	0.0075	0.00751	0.00751	0.00752	0.00739	0.00731	0.0072	0.00709	0.00694	0.00693	0.00693	0.007	0.00694	0.0069	0.00679	0.00671	0.00653	0.00634
2726.83	0.00815	0.0081	0.00833	0.00824	0.00814	0.00801	0.00789	0.00765	0.00753	0.00763	0.00749	0.00749	0.0075	0.00751	0.00751	0.00738	0.00731	0.00719	0.00709	0.00694	0.00692	0.00692	0.00699	0.00694	0.00689	0.00678	0.0067	0.00652	0.00634
2728.76	0.00814	0.00809	0.00833	0.00824	0.00814	0.008	0.00788	0.00764	0.00753	0.00763	0.00748	0.00748	0.0075	0.0075	0.00751	0.00737	0.0073	0.00718	0.00708	0.00693	0.00692	0.00691	0.00699	0.00693	0.00689	0.00678	0.0067	0.00652	0.00633
2730.69	0.00813	0.00809	0.00832	0.00823	0.00812	0.00799	0.00788	0.00763	0.00752	0.00762	0.00747	0.00748	0.00749	0.0075	0.0075	0.00737	0.00729	0.00718	0.00707	0.00693	0.00692	0.00691	0.00698	0.00693	0.00689	0.00677	0.00669	0.00651	0.00633
2732.62	0.00813	0.00808	0.00832	0.00822	0.00812	0.00798	0.00787	0.00763	0.00751	0.00761	0.00747	0.00747	0.00749	0.0075	0.0075	0.00736	0.00728	0.00717	0.00707	0.00692	0.00692	0.0069	0.00698	0.00693	0.00688	0.00677	0.00669	0.00651	0.00633
2734.55	0.00812	0.00807	0.00831	0.00822	0.00811	0.00797	0.00787	0.00762	0.00751	0.0076	0.00746	0.00747	0.00748	0.00749	0.00749	0.00735	0.00728	0.00716	0.00706	0.00692	0.00691	0.0069	0.00697	0.00692	0.00688	0.00676	0.00669	0.0065	0.00632
2736.48	0.00811	0.00806	0.00831	0.00821	0.0081	0.00797	0.00787	0.00762	0.0075	0.0076	0.00746	0.00746	0.00748	0.00749	0.00749	0.00735	0.00728	0.00716	0.00706	0.00691	0.00691	0.00689	0.00697	0.00692	0.00687	0.00676	0.00668	0.0065	0.00632
2738.4	0.00811	0.00806	0.0083	0.0082	0.0081	0.00797	0.00786	0.00761	0.0075	0.00759	0.00746	0.00746	0.00747	0.00748	0.00748	0.00735	0.00728	0.00716	0.00706	0.00691	0.0069	0.00689	0.00697	0.00692	0.00687	0.00676	0.00668	0.0065	0.00632
2740.33	0.0081	0.00805	0.00829	0.0082	0.0081	0.00796	0.00785	0.00761	0.00749	0.00759	0.00745	0.00746	0.00747	0.00747	0.00747	0.00735	0.00727	0.00716	0.00705	0.00691	0.0069	0.00689	0.00696	0.00692	0.00687	0.00676	0.00667	0.0065	0.00632
2742.26	0.0081	0.00805	0.00829	0.00819	0.00809	0.00796	0.00785	0.0076	0.00749	0.00758	0.00745	0.00745	0.00746	0.00747	0.00747	0.00735	0.00727	0.00715	0.00705	0.00691	0.0069	0.00688	0.00696	0.00691	0.00686	0.00676	0.00667	0.0065	0.00631
2744.19	0.0081	0.00805	0.00829	0.00819	0.00809	0.00795	0.00785	0.0076	0.00749	0.00758	0.00744	0.00745	0.00746	0.00747	0.00747	0.00735	0.00727	0.00715	0.00705	0.00691	0.00689	0.00688	0.00696	0.00691	0.00686	0.00676	0.00667	0.00649	0.00631
2746.12	0.0081	0.00805	0.00829	0.00818	0.00808	0.00795	0.00784	0.00759	0.00749	0.00758	0.00744	0.00744	0.00746	0.00747	0.00747	0.00734	0.00727	0.00715	0.00704	0.00691	0.00689	0.00688	0.00696	0.0069	0.00686	0.00675	0.00667	0.00649	0.00631
2748.05	0.00809	0.00804	0.00828	0.00818	0.00808	0.00795	0.00784	0.00759	0.00748	0.00758	0.00744	0.00744	0.00745	0.00746	0.00747	0.00734	0.00726	0.00715	0.00704	0.0069	0.00689	0.00688	0.00696	0.0069	0.00686	0.00675	0.00667	0.00649	0.00631
2749.97	0.00809	0.00804	0.00828	0.00817	0.00808	0.00794	0.00783	0.00759	0.00748	0.00757	0.00743	0.00743	0.00745	0.00746	0.00746	0.00733	0.00726	0.00715	0.00704	0.00689	0.00689	0.00688	0.00695	0.00689	0.00686	0.00674	0.00666	0.00649	0.00631
2751.9	0.00808	0.00803	0.00827	0.00817	0.00807	0.00794	0.00783	0.00758	0.00747	0.00757	0.00743	0.00743	0.00744	0.00745	0.00746	0.00732	0.00725	0.00714	0.00704	0.00689	0.00688	0.00687	0.00695	0.00689	0.00685	0.00674	0.00666	0.00648	0.00631
2753.83	0.00807	0.00802	0.00826	0.00816	0.00806	0.00793	0.00782	0.00757	0.00746	0.00756	0.00742	0.00742	0.00743	0.00744	0.00745	0.00732	0.00724	0.00713	0.00703	0.00688	0.00688	0.00687	0.00694	0.00689	0.00685	0.00674	0.00666	0.00648	0.0063
2755.76	0.00807	0.00802	0.00826	0.00815	0.00805	0.00792	0.00782	0.00756	0.00746	0.00755	0.00741	0.00742	0.00743	0.00744	0.00744	0.00731	0.00724	0.00713	0.00702	0.00688	0.00687	0.00686	0.00693	0.00688	0.00684	0.00674	0.00666	0.00647	0.0063
2757.69	0.00807	0.00801	0.00825	0.00815	0.00805	0.00791	0.00781	0.00756	0.00745	0.00754	0.00741	0.00741	0.00742	0.00743	0.00744	0.00731	0.00723	0.00712	0.00701	0.00687	0.00687	0.00686	0.00693	0.00688	0.00684	0.00673	0.00665	0.00647	0.00629
2759.62	0.00806	0.00801	0.00824	0.00814	0.00804	0.00791	0.0078	0.00755	0.00744	0.00754	0.0074	0.0074	0.00742	0.00743	0.00743	0.00731	0.00723	0.00712	0.00701	0.00686	0.00686	0.00685	0.00693	0.00688	0.00683	0.00673	0.00665	0.00647	0.00628
2761.55	0.00805	0.008	0.00823	0.00813	0.00803	0.0079	0.00779	0.00754	0.00743	0.00753	0.00739	0.0074	0.00741	0.00742	0.00742	0.0073	0.00722	0.00711	0.007	0.00686	0.00686	0.00684	0.00692	0.00687	0.00682	0.00672	0.00664	0.00646	0.00628
2763.47	0.00804	0.00799	0.00822	0.00811	0.00802	0.00789	0.00778	0.00754	0.00743	0.00752	0.00739	0.00739	0.0074	0.00741	0.00741	0.00729	0.00722	0.0071	0.00699	0.00685	0.00685	0.00684	0.00691	0.00686	0.00682	0.00671	0.00663	0.00645	0.00628
2765.4	0.00803	0.00798	0.00821	0.00811	0.00801	0.00788	0.00778	0.00753	0.00742	0.00751	0.00738	0.00739	0.00739	0.0074	0.0074	0.00728	0.00721	0.0071	0.00699	0.00685	0.00684	0.00683	0.00691	0.00685	0.00681	0.0067	0.00662	0.00644	0.00627
2767.33	0.00803	0.00796	0.0082	0.0081	0.008	0.00786	0.00777	0.00752	0.00741	0.0075	0.00737	0.00738	0.00739	0.00739	0.0074	0.00727	0.0072	0.00709	0.00698	0.00684	0.00683	0.00683	0.0069	0.00684	0.0068	0.0067	0.00662	0.00644	0.00627
2769.26	0.00802	0.00795	0.00819	0.00809	0.00799	0.00786	0.00776	0.00751	0.0074	0.0075	0.00736	0.00737	0.00738	0.00739	0.00739	0.00726	0.00719	0.00708	0.00698	0.00683	0.00682	0.00682	0.00689	0.00683	0.0068	0.00669	0.00661	0.00643	0.00627
2771.19	0.008	0.00794	0.00818	0.00808	0.00798	0.00785	0.00775	0.0075	0.00739	0.00749	0.00735	0.00736	0.00737	0.00737	0.00738	0.00725	0.00718	0.00707	0.00697	0.00682	0.00682	0.00681	0.00688	0.00683	0.00679	0.00668	0.0066	0.00643	0.00626
2773.12	0.00799	0.00794	0.00817	0.00807	0.00797	0.00784	0.00774	0.00749	0.00738	0.00748	0.00734	0.00734	0.00736	0.00736	0.00737	0.00724	0.00717	0.00706	0.00696	0.00682	0.00682	0.0068	0.00688	0.00682	0.00678	0.00667	0.00659	0.00642	0.00625
2775.04	0.00797	0.00793	0.00816	0.00806	0.00796	0.00783	0.00772	0.00748	0.00737	0.00747	0.00733	0.00733	0.00735	0.00735	0.00736	0.00723	0.00716	0.00705	0.00695	0.00681	0.00681	0.00679	0.00687	0.00682	0.00677	0.00667	0.00658	0.00641	0.00624
2776.97	0.00796	0.00792	0.00814	0.00804	0.00795	0.00781	0.00771	0.00747	0.00736	0.00745	0.00732	0.00732	0.00734	0.00734	0.00735	0.00722	0.00715	0.00704	0.00694	0.0068	0.00679	0.00678	0.00685	0.00681	0.00676	0.00666	0.00657	0.0064	0.00623
2778.9	0.00795	0.0079	0.00813	0.00803	0.00793	0.0078	0.00769	0.00745	0.00735	0.00744	0.0073	0.00731	0.00732	0.00733	0.00733	0.00721	0.00713	0.00702	0.00693	0.00678	0.00679	0.00677	0.00684	0.0068	0.00675	0.00664	0.00656	0.00639	0.00621
2780.83	0.00793	0.00789	0.00811	0.00801	0.00792	0.00778	0.00768	0.00744	0.00733	0.00742	0.00729	0.0073	0.00731	0.00732	0.00732	0.00719	0.00712	0.00701	0.00691	0.00677	0.00678	0.00676	0.00683	0.00678	0.00674	0.00663	0.00655	0.00638	0.00621
2782.76	0.00792	0.00787	0.0081	0.008	0.0079	0.00777	0.00766	0.00743	0.00732	0.00741	0.00728	0.00728	0.0073	0.00731	0.00731	0.00718	0.00711	0.007	0.0069	0.00676	0.00677	0.00674	0.00682	0.00677	0.00673	0.00662	0.00654	0.00637	0.0062
2784.69	0.00791	0.00785	0.00808	0.00798	0.00789	0.00775	0.00765	0.00741	0.0073	0.0074	0.00726	0.00727	0.00728	0.00729	0.0073	0.00717	0.0071	0.00699	0.00689	0.00675	0.00675	0.00673	0.00681	0.00676	0.00672	0.00661	0.00653	0.00636	0.00619
2786.62	0.00789	0.00784	0.00807	0.00797	0.00787	0.00774	0.00764	0.0074	0.00729	0.00738	0.00725	0.00725	0.00727	0.00728	0.00729	0.00716	0.00709	0.00698	0.00688	0.00674	0.00673	0.00672	0.0068	0.00675	0.00671	0.0066	0.00652	0.00635	0.00618
2788.54	0.00788	0.00783	0.00806	0.00796	0.00786	0.00773	0.00763	0.00739	0.00728	0.00737	0.00724	0.00724	0.00726	0.00727	0.00727	0.00715	0.00708	0.00697	0.00687	0.00673	0.00672	0.00671	0.00679	0.00674	0.0067	0.00659	0.00652	0.00634	0.00617
2790.47	0.00786	0.00781	0.00804	0.00794	0.00784	0.00771	0.00761	0.00737	0.00726	0.00736	0.00723	0.00723	0.00724	0.00725	0.00726	0.00714	0.00707	0.00696	0.00686	0.00673	0.00671	0.00671	0.00677	0.00673	0.00669	0.00658	0.00651	0.00633	0.00616
2792.4	0.00784	0.0078	0.00802	0.00793	0.00783	0.0077	0.0076	0.00736	0.00725	0.00735	0.00722	0.00722	0.00723	0.00724	0.00725	0.00713	0.00705	0.00695	0.00685	0.00671	0.0067	0.00669	0.00676	0.00671	0.00668	0.00657	0.0065	0.00632	0.00615
2794.33	0.00783	0.00778	0.00801	0.00791	0.00781	0.00769	0.00758	0.00734	0.00724	0.00734	0.0072	0.00721	0.00722	0.00723	0.00723	0.00711	0.00704	0.00694	0.00683	0.0067	0.00669	0.00668	0.00675	0.0067	0.00666	0.00656	0.00648	0.00631	0.00614
2796.26	0.00782	0.00777	0.00799	0.0079	0.0078	0.00767	0.00757	0.00733	0.00723	0.00732	0.00719	0.00719	0.00721	0.00722	0.00722	0.0071	0.00703	0.00693	0.00682	0.00669	0.00668	0.00667	0.00674	0.00669	0.00665	0.00654	0.00647	0.0063	0.00613
2798.19	0.00781	0.00775	0.00798	0.00788	0.00779	0.00766	0.00756	0.00732	0.00722	0.00731	0.00718	0.00718	0.00719	0.0072	0.00721	0.00708	0.00702	0.00691	0.00681	0.00667	0.00666	0.00665	0.00673	0.00668	0.00664	0.00653	0.00646	0.00629	0.00613
2800.11	0.00779	0.00774	0.00796	0.00787	0.00778	0.00764	0.00754	0.00731	0.0072	0.0073	0.00716	0.00717	0.00718	0.00719	0.0072	0.00707	0.00701	0.0069	0.0068	0.00666	0.00665	0.00664	0.00671	0.00667	0.00663	0.00652	0.00645	0.00628	0.00611
2802.04	0.00777	0.00772	0.00794	0.00785	0.00776	0.00763	0.00753	0.00729	0.00719	0.00728	0.00715	0.00716	0.00717	0.00717	0.00718	0.00706	0.00699	0.00689	0.00679	0.00665	0.00664	0.00663	0.0067	0.00665	0.00662	0.00651	0.00644	0.00627	0.0061
2803.97	0.00775	0.00771	0.00793	0.00783	0.00774	0.00761	0.00751	0.00727	0.00717	0.00727	0.00713	0.00714	0.00715	0.00716	0.00717	0.00705	0.00698	0.00687	0.00677	0.00664	0.00663	0.00661	0.00669	0.00664	0.0066	0.0065	0.00643	0.00626	0.00609
2805.9	0.00774	0.00769	0.00791	0.00782	0.00772	0.00759	0.0075	0.00726	0.00716	0.00725	0.00712	0.00713	0.00714	0.00715	0.00715	0.00703	0.00696	0.00686	0.00676	0.00663	0.00662	0.0066	0.00668	0.00663	0.00659	0.00649	0.00642	0.00624	0.00608
2807.83	0.00772	0.00768	0.00789	0.0078	0.00771	0.00758	0.00748	0.00725	0.00715	0.00724	0.00711	0.00712	0.00713	0.00714	0.00714	0.00702	0.00695	0.00685	0.00675	0.00661	0.0066	0.00659	0.00667	0.00662	0.00658	0.00647	0.0064	0.00623	0.00607
2809.76	0.00771	0.00766	0.00788	0.00778	0.00769	0.00757	0.00747	0.00723	0.00713	0.00722	0.00709	0.0071	0.00711	0.00712	0.00713	0.00701	0.00694	0.00684	0.00674	0.0066	0.00659	0.00658	0.00666	0.00661	0.00657	0.00646	0.00639	0.00622	0.00606
2811.68	0.00769	0.00764	0.00786	0.00777	0.00768	0.00755	0.00745	0.00722	0.00711	0.0072	0.00708	0.00708	0.00709	0.0071	0.00711	0.00699	0.00692	0.00683	0.00672	0.00658	0.00657	0.00657	0.00664	0.00659	0.00655	0.00645	0.00638	0.00621	0.00605
2813.61	0.00767	0.00762	0.00784	0.00775	0.00766	0.00753	0.00744	0.0072	0.0071	0.00719	0.00706	0.00707	0.00708	0.00709	0.0071	0.00698	0.00691	0.00681	0.0067	0.00657	0.00656	0.00655	0.00662	0.00658	0.00654	0.00643	0.00636	0.0062	0.00603
2815.54	0.00765	0.0076	0.00783	0.00773	0.00764	0.00751	0.00742	0.00719	0.00708	0.00717	0.00704	0.00705	0.00706	0.00707	0.00708	0.00696	0.00689	0.00679	0.00669	0.00655	0.00654	0.00654	0.00661	0.00656	0.00653	0.00642	0.00635	0.00618	0.00602
2817.47	0.00764	0.00759	0.00781	0.00771	0.00762	0.0075	0.0074	0.00717	0.00706	0.00716	0.00703	0.00704	0.00704	0.00705	0.00706	0.00694	0.00688	0.00677	0.00667	0.00654	0.00653	0.00652	0.0066	0.00655	0.00651	0.00641	0.00633	0.00617	0.00601
2819.4	0.00762	0.00756	0.00779	0.00769	0.0076	0.00748	0.00738	0.00715	0.00704	0.00714	0.00701	0.00702	0.00703	0.00704	0.00704	0.00692	0.00686	0.00676	0.00666	0.00652	0.00651	0.0065	0.00658	0.00653	0.00649	0.00639	0.00632	0.00615	0.00599
2821.33	0.0076	0.00754	0.00776	0.00767	0.00757	0.00746	0.00736	0.00713	0.00702	0.00712	0.00699	0.007	0.00701	0.00702	0.00702	0.0069	0.00684	0.00674	0.00663	0.0065	0.00649	0.00648	0.00656	0.00651	0.00647	0.00637	0.0063	0.00614	0.00597
2823.26	0.00757	0.00752	0.00774	0.00764	0.00755	0.00743	0.00733	0.0071	0.007	0.00709	0.00697	0.00697	0.00698	0.00699	0.00699	0.00687	0.00681	0.00671	0.00661	0.00648	0.00647	0.00646	0.00654	0.00649	0.00645	0.00635	0.00628	0.00611	0.00596
2825.18	0.00754	0.00749	0.00771	0.00761	0.00753	0.0074	0.0073	0.00708	0.00697	0.00706	0.00694	0.00695	0.00695	0.00696	0.00697	0.00685	0.00678	0.00669	0.00658	0.00646	0.00645	0.00644	0.00651	0.00646	0.00642	0.00632	0.00625	0.00609	0.00593
2827.11	0.00751	0.00746	0.00767	0.00758	0.00749	0.00737	0.00727	0.00705	0.00694	0.00703	0.00691	0.00692	0.00692	0.00693	0.00693	0.00682	0.00675	0.00666	0.00656	0.00643	0.00642	0.00642	0.00648	0.00643	0.00639	0.00629	0.00622	0.00606	0.00591
2829.04	0.00747	0.00742	0.00764	0.00755	0.00745	0.00733	0.00724	0.00701	0.00691	0.007	0.00688	0.00688	0.00689	0.0069	0.0069	0.00679	0.00672	0.00663	0.00653	0.0064	0.00639	0.00638	0.00645	0.0064	0.00636	0.00626	0.00619	0.00603	0.00588
2830.97	0.00743	0.00738	0.0076	0.00751	0.00741	0.00729	0.0072	0.00697	0.00687	0.00696	0.00684	0.00685	0.00686	0.00686	0.00686	0.00675	0.00668	0.00659	0.00649	0.00636	0.00635	0.00634	0.00642	0.00637	0.00633	0.00623	0.00616	0.006	0.00585
2832.9	0.00739	0.00734	0.00755	0.00746	0.00736	0.00724	0.00715	0.00692	0.00683	0.00691	0.00679	0.0068	0.00681	0.00682	0.00682	0.00671	0.00664	0.00655	0.00645	0.00632	0.00632	0.0063	0.00638	0.00632	0.00629	0.00619	0.00612	0.00596	0.00581
2834.83	0.00733	0.00728	0.0075	0.0074	0.00731	0.00719	0.0071	0.00687	0.00678	0.00686	0.00674	0.00675	0.00676	0.00677	0.00677	0.00666	0.00659	0.00649	0.0064	0.00627	0.00627	0.00625	0.00633	0.00628	0.00624	0.00614	0.00608	0.00591	0.00576
2836.75	0.00726	0.00722	0.00743	0.00733	0.00724	0.00713	0.00703	0.00682	0.00672	0.0068	0.00667	0.00669	0.00669	0.00671	0.00671	0.0066	0.00653	0.00643	0.00634	0.00621	0.00621	0.0062	0.00627	0.00622	0.00618	0.00609	0.00602	0.00586	0.00571
2838.68	0.00718	0.00714	0.00734	0.00725	0.00716	0.00704	0.00695	0.00674	0.00664	0.00672	0.0066	0.00661	0.00662	0.00663	0.00663	0.00652	0.00645	0.00636	0.00627	0.00614	0.00613	0.00612	0.00619	0.00614	0.00611	0.00601	0.00595	0.00579	0.00564
2840.61	0.00708	0.00703	0.00724	0.00714	0.00705	0.00694	0.00685	0.00663	0.00654	0.00662	0.0065	0.00651	0.00652	0.00652	0.00653	0.00642	0.00635	0.00626	0.00617	0.00604	0.00604	0.00603	0.0061	0.00605	0.00601	0.00592	0.00586	0.0057	0.00555
2842.54	0.00694	0.00689	0.00709	0.007	0.00691	0.00679	0.00671	0.0065	0.0064	0.00649	0.00637	0.00637	0.00638	0.00639	0.00639	0.00629	0.00622	0.00614	0.00604	0.00591	0.00591	0.0059	0.00597	0.00592	0.00588	0.00579	0.00573	0.00558	0.00543
2844.47	0.00676	0.00672	0.00691	0.00682	0.00673	0.00662	0.00654	0.00633	0.00624	0.00632	0.0062	0.00621	0.00622	0.00622	0.00622	0.00612	0.00606	0.00598	0.00588	0.00576	0.00576	0.00574	0.00581	0.00576	0.00572	0.00563	0.00557	0.00543	0.00529
2846.4	0.00658	0.00654	0.00672	0.00664	0.00654	0.00643	0.00635	0.00615	0.00607	0.00614	0.00603	0.00604	0.00605	0.00604	0.00604	0.00594	0.00589	0.00581	0.00571	0.00559	0.00559	0.00558	0.00564	0.0056	0.00556	0.00547	0.00541	0.00527	0.00514
2848.33	0.00645	0.0064	0.00658	0.0065	0.00641	0.0063	0.00622	0.00603	0.00594	0.00602	0.00591	0.00591	0.00592	0.00592	0.00592	0.00582	0.00577	0.00569	0.0056	0.00548	0.00548	0.00547	0.00552	0.00548	0.00545	0.00536	0.0053	0.00517	0.00504
2850.25	0.00639	0.00635	0.00652	0.00644	0.00636	0.00625	0.00617	0.00597	0.00589	0.00597	0.00586	0.00587	0.00587	0.00587	0.00587	0.00578	0.00572	0.00564	0.00555	0.00544	0.00544	0.00543	0.00548	0.00544	0.00541	0.00533	0.00526	0.00514	0.005
2852.18	0.00637	0.00633	0.00651	0.00643	0.00634	0.00624	0.00616	0.00596	0.00588	0.00596	0.00585	0.00586	0.00586	0.00587	0.00587	0.00578	0.00571	0.00564	0.00555	0.00544	0.00543	0.00542	0.00548	0.00544	0.00541	0.00533	0.00526	0.00514	0.005
2854.11	0.00636	0.00633	0.0065	0.00642	0.00633	0.00623	0.00615	0.00595	0.00588	0.00595	0.00584	0.00585	0.00586	0.00586	0.00586	0.00577	0.00571	0.00564	0.00555	0.00544	0.00543	0.00542	0.00548	0.00544	0.00541	0.00532	0.00526	0.00513	0.005
2856.04	0.00635	0.00631	0.00648	0.0064	0.00632	0.00622	0.00614	0.00595	0.00586	0.00594	0.00583	0.00584	0.00585	0.00585	0.00585	0.00576	0.0057	0.00563	0.00554	0.00543	0.00542	0.00541	0.00547	0.00543	0.0054	0.00531	0.00526	0.00513	0.00499
2857.97	0.00634	0.0063	0.00648	0.0064	0.00632	0.00621	0.00613	0.00594	0.00586	0.00593	0.00582	0.00583	0.00584	0.00585	0.00585	0.00576	0.0057	0.00562	0.00553	0.00542	0.00542	0.00541	0.00547	0.00543	0.0054	0.00531	0.00526	0.00512	0.00499
2859.9	0.00635	0.0063	0.00649	0.0064	0.00632	0.00622	0.00614	0.00594	0.00586	0.00594	0.00583	0.00584	0.00584	0.00586	0.00585	0.00576	0.00571	0.00563	0.00554	0.00543	0.00542	0.00542	0.00547	0.00544	0.0054	0.00532	0.00526	0.00513	0.005
2861.82	0.00636	0.00631	0.0065	0.00641	0.00633	0.00623	0.00615	0.00595	0.00587	0.00595	0.00584	0.00585	0.00586	0.00587	0.00587	0.00577	0.00572	0.00564	0.00555	0.00544	0.00544	0.00543	0.00548	0.00545	0.00542	0.00533	0.00527	0.00514	0.00501
2863.75	0.00636	0.00632	0.00651	0.00642	0.00634	0.00624	0.00616	0.00596	0.00588	0.00596	0.00585	0.00586	0.00587	0.00587	0.00588	0.00578	0.00573	0.00565	0.00556	0.00545	0.00545	0.00544	0.0055	0.00546	0.00542	0.00534	0.00528	0.00515	0.00502
2865.68	0.00636	0.00632	0.0065	0.00642	0.00634	0.00624	0.00616	0.00596	0.00588	0.00596	0.00584	0.00585	0.00587	0.00587	0.00588	0.00578	0.00573	0.00565	0.00556	0.00545	0.00545	0.00544	0.0055	0.00545	0.00542	0.00534	0.00528	0.00515	0.00502
2867.61	0.00635	0.00631	0.00649	0.00641	0.00633	0.00622	0.00615	0.00595	0.00586	0.00595	0.00583	0.00584	0.00585	0.00586	0.00587	0.00577	0.00572	0.00564	0.00555	0.00544	0.00544	0.00543	0.00548	0.00544	0.00541	0.00533	0.00527	0.00514	0.00501
2869.54	0.00633	0.00629	0.00647	0.00639	0.00631	0.00621	0.00613	0.00593	0.00585	0.00593	0.00581	0.00583	0.00584	0.00584	0.00585	0.00576	0.0057	0.00562	0.00553	0.00542	0.00542	0.00541	0.00547	0.00543	0.0054	0.00531	0.00526	0.00513	0.00499
2871.47	0.00632	0.00628	0.00646	0.00638	0.0063	0.0062	0.00612	0.00592	0.00584	0.00592	0.00581	0.00582	0.00583	0.00584	0.00584	0.00575	0.00569	0.00561	0.00552	0.00542	0.00541	0.0054	0.00546	0.00543	0.00539	0.0053	0.00525	0.00512	0.00498
2873.4	0.00633	0.00629	0.00647	0.00639	0.00631	0.00621	0.00613	0.00593	0.00585	0.00593	0.00582	0.00583	0.00584	0.00585	0.00585	0.00576	0.0057	0.00562	0.00553	0.00542	0.00542	0.00541	0.00547	0.00543	0.0054	0.00531	0.00526	0.00513	0.00499
2875.32	0.00636	0.00632	0.0065	0.00642	0.00634	0.00624	0.00616	0.00596	0.00588	0.00596	0.00585	0.00586	0.00587	0.00587	0.00588	0.00578	0.00573	0.00565	0.00556	0.00545	0.00545	0.00544	0.0055	0.00546	0.00542	0.00534	0.00528	0.00515	0.00502
2877.25	0.0064	0.00636	0.00654	0.00646	0.00638	0.00628	0.0062	0.006	0.00592	0.006	0.00589	0.0059	0.00591	0.00591	0.00592	0.00582	0.00577	0.00569	0.0056	0.00549	0.00548	0.00547	0.00554	0.0055	0.00546	0.00538	0.00532	0.00518	0.00506
2879.18	0.00644	0.0064	0.00659	0.0065	0.00642	0.00632	0.00624	0.00604	0.00596	0.00604	0.00592	0.00593	0.00595	0.00595	0.00596	0.00586	0.0058	0.00572	0.00563	0.00552	0.00552	0.00551	0.00558	0.00553	0.0055	0.00541	0.00536	0.00522	0.00509
2881.11	0.00647	0.00643	0.00662	0.00653	0.00645	0.00635	0.00627	0.00607	0.00599	0.00607	0.00595	0.00596	0.00598	0.00598	0.00599	0.00589	0.00583	0.00575	0.00566	0.00555	0.00555	0.00554	0.0056	0.00556	0.00553	0.00544	0.00539	0.00525	0.00512
2883.04	0.00649	0.00644	0.00663	0.00655	0.00647	0.00636	0.00628	0.00609	0.006	0.00608	0.00597	0.00598	0.00599	0.006	0.006	0.00591	0.00585	0.00576	0.00568	0.00556	0.00556	0.00555	0.00561	0.00557	0.00554	0.00545	0.0054	0.00526	0.00513
2884.97	0.00648	0.00644	0.00663	0.00654	0.00647	0.00636	0.00628	0.00608	0.006	0.00608	0.00597	0.00598	0.00599	0.00599	0.006	0.0059	0.00584	0.00576	0.00568	0.00556	0.00556	0.00555	0.00561	0.00557	0.00554	0.00545	0.0054	0.00526	0.00513
2886.89	0.00647	0.00642	0.00661	0.00652	0.00645	0.00634	0.00626	0.00606	0.00598	0.00606	0.00595	0.00596	0.00597	0.00597	0.00598	0.00588	0.00583	0.00575	0.00566	0.00555	0.00554	0.00553	0.00559	0.00555	0.00552	0.00543	0.00538	0.00524	0.00511
2888.82	0.00643	0.00639	0.00658	0.00649	0.00642	0.00631	0.00623	0.00603	0.00595	0.00602	0.00591	0.00593	0.00594	0.00594	0.00594	0.00585	0.0058	0.00572	0.00562	0.00552	0.00551	0.0055	0.00556	0.00552	0.00549	0.0054	0.00535	0.00522	0.00508
2890.75	0.00639	0.00634	0.00653	0.00644	0.00637	0.00626	0.00618	0.00599	0.0059	0.00598	0.00587	0.00589	0.0059	0.0059	0.0059	0.00581	0.00576	0.00567	0.00558	0.00547	0.00547	0.00546	0.00552	0.00548	0.00545	0.00536	0.00531	0.00518	0.00505
2892.68	0.00633	0.00629	0.00647	0.00639	0.00632	0.00621	0.00612	0.00594	0.00585	0.00593	0.00583	0.00583	0.00585	0.00585	0.00585	0.00576	0.00571	0.00563	0.00554	0.00542	0.00542	0.00541	0.00548	0.00544	0.0054	0.00532	0.00527	0.00513	0.005
2894.61	0.00627	0.00623	0.00641	0.00632	0.00625	0.00616	0.00607	0.00588	0.0058	0.00588	0.00577	0.00578	0.00579	0.0058	0.0058	0.00571	0.00565	0.00558	0.00549	0.00538	0.00537	0.00536	0.00542	0.00539	0.00535	0.00527	0.00521	0.00508	0.00495
2896.54	0.00621	0.00617	0.00635	0.00626	0.00619	0.0061	0.00601	0.00582	0.00574	0.00582	0.00571	0.00572	0.00573	0.00574	0.00574	0.00565	0.00559	0.00552	0.00543	0.00532	0.00532	0.00531	0.00537	0.00533	0.0053	0.00522	0.00516	0.00503	0.0049
2898.47	0.00615	0.00611	0.00628	0.0062	0.00612	0.00603	0.00595	0.00576	0.00568	0.00576	0.00565	0.00566	0.00567	0.00567	0.00567	0.00559	0.00554	0.00546	0.00537	0.00526	0.00526	0.00525	0.00531	0.00527	0.00524	0.00516	0.0051	0.00498	0.00485
2900.39	0.00608	0.00604	0.00621	0.00613	0.00606	0.00596	0.00588	0.0057	0.00562	0.0057	0.00559	0.0056	0.00561	0.00561	0.00561	0.00553	0.00548	0.0054	0.00531	0.0052	0.0052	0.00519	0.00525	0.00521	0.00519	0.0051	0.00505	0.00493	0.0048
2902.32	0.00601	0.00597	0.00615	0.00606	0.00599	0.0059	0.00582	0.00564	0.00555	0.00563	0.00552	0.00553	0.00554	0.00555	0.00555	0.00546	0.00541	0.00534	0.00525	0.00514	0.00514	0.00513	0.0052	0.00515	0.00513	0.00504	0.00499	0.00487	0.00474
2904.25	0.00594	0.0059	0.00607	0.00599	0.00591	0.00582	0.00574	0.00556	0.00548	0.00556	0.00546	0.00546	0.00548	0.00548	0.00548	0.00539	0.00535	0.00527	0.00519	0.00508	0.00507	0.00507	0.00513	0.00509	0.00506	0.00498	0.00493	0.0048	0.00469
2906.18	0.00585	0.00582	0.00598	0.00591	0.00583	0.00573	0.00566	0.00549	0.0054	0.00548	0.00538	0.00538	0.0054	0.0054	0.0054	0.00532	0.00527	0.00519	0.00511	0.00501	0.005	0.00499	0.00505	0.00501	0.00498	0.0049	0.00485	0.00473	0.00462
2908.11	0.00576	0.00572	0.00588	0.00581	0.00573	0.00564	0.00557	0.00539	0.00531	0.00538	0.00529	0.00529	0.0053	0.0053	0.0053	0.00522	0.00518	0.0051	0.00502	0.00492	0.00492	0.0049	0.00496	0.00492	0.00489	0.00481	0.00476	0.00464	0.00453
2910.04	0.00564	0.0056	0.00575	0.00568	0.00561	0.00551	0.00545	0.00528	0.00519	0.00526	0.00517	0.00518	0.00518	0.00519	0.00518	0.00511	0.00506	0.00499	0.00491	0.00481	0.00481	0.0048	0.00485	0.00481	0.00478	0.00471	0.00466	0.00454	0.00443
2911.96	0.0055	0.00546	0.00561	0.00553	0.00546	0.00537	0.00531	0.00514	0.00506	0.00513	0.00504	0.00504	0.00505	0.00505	0.00505	0.00497	0.00492	0.00485	0.00478	0.00468	0.00468	0.00467	0.00472	0.00468	0.00465	0.00458	0.00454	0.00442	0.00431
2913.89	0.00535	0.00531	0.00546	0.00539	0.00532	0.00523	0.00517	0.005	0.00492	0.00499	0.0049	0.00491	0.00491	0.00491	0.00491	0.00483	0.00478	0.00472	0.00465	0.00456	0.00455	0.00455	0.00459	0.00456	0.00452	0.00445	0.00441	0.0043	0.00419
2915.82	0.00524	0.00519	0.00534	0.00527	0.0052	0.00511	0.00505	0.00489	0.00482	0.00488	0.0048	0.0048	0.00481	0.0048	0.0048	0.00473	0.00468	0.00461	0.00454	0.00446	0.00445	0.00445	0.00449	0.00446	0.00442	0.00436	0.00432	0.0042	0.0041
2917.75	0.00515	0.00511	0.00526	0.00518	0.00512	0.00504	0.00497	0.00482	0.00475	0.00481	0.00472	0.00472	0.00474	0.00473	0.00473	0.00466	0.00462	0.00454	0.00448	0.00439	0.00439	0.00438	0.00442	0.00439	0.00436	0.00429	0.00425	0.00414	0.00404
2919.68	0.0051	0.00506	0.00521	0.00513	0.00507	0.00499	0.00492	0.00477	0.0047	0.00476	0.00467	0.00468	0.00469	0.00469	0.00468	0.00461	0.00457	0.0045	0.00443	0.00435	0.00435	0.00433	0.00438	0.00435	0.00432	0.00426	0.00421	0.00411	0.00401
2921.61	0.00506	0.00502	0.00517	0.0051	0.00504	0.00496	0.00489	0.00473	0.00467	0.00473	0.00464	0.00464	0.00466	0.00466	0.00465	0.00459	0.00455	0.00448	0.00441	0.00432	0.00432	0.0043	0.00436	0.00433	0.0043	0.00423	0.00419	0.00408	0.00398
2923.54	0.00504	0.005	0.00514	0.00507	0.00501	0.00493	0.00487	0.00471	0.00464	0.0047	0.00462	0.00462	0.00463	0.00464	0.00464	0.00457	0.00453	0.00446	0.00439	0.0043	0.0043	0.00429	0.00434	0.00431	0.00428	0.00421	0.00417	0.00407	0.00397
2925.46	0.00502	0.00498	0.00512	0.00505	0.005	0.00492	0.00486	0.0047	0.00463	0.00469	0.00461	0.00461	0.00462	0.00462	0.00463	0.00456	0.00451	0.00445	0.00438	0.00429	0.00429	0.00428	0.00433	0.0043	0.00427	0.00421	0.00417	0.00406	0.00396
2927.39	0.00502	0.00498	0.00512	0.00506	0.005	0.00492	0.00486	0.0047	0.00463	0.00469	0.00461	0.00461	0.00463	0.00463	0.00463	0.00456	0.00451	0.00445	0.00438	0.0043	0.00429	0.00428	0.00434	0.00431	0.00428	0.00422	0.00417	0.00407	0.00397
2929.32	0.00504	0.005	0.00514	0.00508	0.00502	0.00494	0.00488	0.00472	0.00465	0.00472	0.00463	0.00463	0.00464	0.00465	0.00466	0.00458	0.00454	0.00448	0.00441	0.00432	0.00432	0.0043	0.00436	0.00433	0.0043	0.00424	0.00419	0.00409	0.00399
2931.25	0.00508	0.00504	0.00519	0.00512	0.00506	0.00498	0.00491	0.00476	0.00469	0.00476	0.00467	0.00467	0.00468	0.00469	0.00469	0.00462	0.00458	0.00452	0.00444	0.00436	0.00436	0.00435	0.0044	0.00437	0.00434	0.00427	0.00423	0.00412	0.00403
2933.18	0.00514	0.0051	0.00525	0.00518	0.00512	0.00503	0.00497	0.00482	0.00475	0.00481	0.00472	0.00473	0.00474	0.00475	0.00475	0.00468	0.00464	0.00457	0.0045	0.00441	0.00441	0.00441	0.00445	0.00442	0.00439	0.00433	0.00429	0.00418	0.00408
2935.11	0.00521	0.00517	0.00533	0.00525	0.00519	0.00511	0.00505	0.00489	0.00482	0.00488	0.0048	0.0048	0.00481	0.00482	0.00482	0.00475	0.00471	0.00464	0.00457	0.00448	0.00448	0.00448	0.00452	0.00449	0.00446	0.0044	0.00436	0.00424	0.00415
2937.03	0.0053	0.00525	0.00541	0.00534	0.00528	0.00519	0.00513	0.00497	0.0049	0.00496	0.00488	0.00488	0.00489	0.0049	0.00491	0.00483	0.00479	0.00472	0.00465	0.00456	0.00455	0.00455	0.0046	0.00457	0.00454	0.00448	0.00443	0.00432	0.00422
2938.96	0.00537	0.00533	0.00549	0.00542	0.00536	0.00527	0.00521	0.00504	0.00498	0.00504	0.00495	0.00496	0.00497	0.00498	0.00498	0.00491	0.00487	0.00479	0.00472	0.00463	0.00463	0.00462	0.00468	0.00464	0.00462	0.00455	0.0045	0.00439	0.00429
2940.89	0.00544	0.0054	0.00556	0.00549	0.00543	0.00534	0.00527	0.00511	0.00504	0.00511	0.00502	0.00503	0.00504	0.00505	0.00505	0.00498	0.00493	0.00486	0.00479	0.00469	0.00469	0.00469	0.00474	0.00471	0.00468	0.00461	0.00457	0.00445	0.00434
2942.82	0.00549	0.00545	0.00561	0.00554	0.00548	0.00539	0.00533	0.00516	0.00509	0.00515	0.00506	0.00507	0.00509	0.0051	0.0051	0.00502	0.00498	0.0049	0.00484	0.00474	0.00473	0.00473	0.00479	0.00475	0.00472	0.00465	0.00461	0.00449	0.00438
2944.75	0.00551	0.00547	0.00563	0.00556	0.0055	0.00541	0.00535	0.00517	0.0051	0.00517	0.00508	0.00509	0.0051	0.00511	0.00512	0.00504	0.005	0.00492	0.00485	0.00475	0.00475	0.00475	0.0048	0.00477	0.00474	0.00467	0.00462	0.00451	0.0044
2946.68	0.00549	0.00546	0.00562	0.00554	0.00548	0.00539	0.00533	0.00516	0.00509	0.00516	0.00506	0.00508	0.00509	0.0051	0.0051	0.00502	0.00498	0.00491	0.00484	0.00474	0.00474	0.00473	0.00478	0.00475	0.00473	0.00466	0.00461	0.0045	0.00439
2948.61	0.00544	0.00541	0.00556	0.00549	0.00543	0.00535	0.00528	0.00511	0.00504	0.00511	0.00502	0.00503	0.00504	0.00505	0.00505	0.00497	0.00493	0.00486	0.00479	0.0047	0.00469	0.00469	0.00474	0.00471	0.00468	0.00461	0.00456	0.00445	0.00435
2950.53	0.00537	0.00533	0.00548	0.00541	0.00535	0.00527	0.0052	0.00504	0.00497	0.00504	0.00495	0.00496	0.00497	0.00498	0.00498	0.0049	0.00486	0.00479	0.00472	0.00463	0.00463	0.00462	0.00467	0.00464	0.00461	0.00454	0.00449	0.00438	0.00428
2952.46	0.00528	0.00524	0.00538	0.00532	0.00525	0.00518	0.00511	0.00495	0.00489	0.00495	0.00486	0.00487	0.00488	0.00489	0.00489	0.00481	0.00478	0.00471	0.00464	0.00455	0.00454	0.00454	0.00459	0.00456	0.00453	0.00446	0.00442	0.00431	0.00421
2954.39	0.00519	0.00515	0.0053	0.00523	0.00517	0.00509	0.00503	0.00487	0.00481	0.00487	0.00478	0.00479	0.0048	0.00481	0.00481	0.00473	0.0047	0.00463	0.00456	0.00447	0.00447	0.00447	0.00452	0.00449	0.00445	0.00439	0.00435	0.00424	0.00414
2956.32	0.00513	0.0051	0.00524	0.00517	0.00511	0.00503	0.00497	0.00482	0.00475	0.00481	0.00473	0.00473	0.00475	0.00475	0.00476	0.00468	0.00464	0.00458	0.00451	0.00442	0.00441	0.00442	0.00447	0.00443	0.0044	0.00434	0.00429	0.00419	0.00409
2958.25	0.00511	0.00507	0.00522	0.00515	0.00509	0.00501	0.00495	0.00479	0.00473	0.00479	0.0047	0.00471	0.00472	0.00473	0.00473	0.00466	0.00462	0.00456	0.00449	0.0044	0.00439	0.00439	0.00444	0.00441	0.00438	0.00432	0.00427	0.00417	0.00407
2960.18	0.00512	0.00508	0.00523	0.00516	0.0051	0.00502	0.00496	0.00481	0.00474	0.0048	0.00472	0.00472	0.00473	0.00474	0.00474	0.00468	0.00463	0.00457	0.0045	0.00441	0.00441	0.0044	0.00445	0.00442	0.00439	0.00433	0.00428	0.00418	0.00408
2962.1	0.00517	0.00513	0.00528	0.00521	0.00515	0.00507	0.00501	0.00486	0.00478	0.00484	0.00476	0.00477	0.00478	0.00479	0.00479	0.00473	0.00467	0.00462	0.00454	0.00446	0.00445	0.00445	0.0045	0.00446	0.00444	0.00438	0.00433	0.00422	0.00412
2964.03	0.00525	0.00521	0.00537	0.00529	0.00523	0.00515	0.00509	0.00493	0.00486	0.00493	0.00484	0.00485	0.00486	0.00487	0.00487	0.0048	0.00475	0.00469	0.00462	0.00453	0.00453	0.00452	0.00458	0.00454	0.00451	0.00445	0.0044	0.0043	0.0042
2965.96	0.00536	0.00532	0.00548	0.00541	0.00534	0.00526	0.00519	0.00504	0.00496	0.00504	0.00494	0.00496	0.00497	0.00497	0.00498	0.00491	0.00486	0.0048	0.00472	0.00463	0.00463	0.00462	0.00468	0.00464	0.00462	0.00455	0.0045	0.00439	0.00429
2967.89	0.00549	0.00545	0.00562	0.00554	0.00547	0.00539	0.00532	0.00516	0.00509	0.00517	0.00507	0.00508	0.00509	0.0051	0.0051	0.00503	0.00499	0.00492	0.00484	0.00475	0.00474	0.00474	0.0048	0.00476	0.00473	0.00467	0.00462	0.00451	0.00441
2969.82	0.00563	0.00559	0.00576	0.00568	0.00561	0.00553	0.00546	0.00529	0.00522	0.0053	0.0052	0.00522	0.00523	0.00524	0.00524	0.00517	0.00512	0.00505	0.00497	0.00487	0.00487	0.00487	0.00493	0.00489	0.00486	0.00479	0.00474	0.00463	0.00453
2971.75	0.00577	0.00573	0.00591	0.00583	0.00576	0.00567	0.00561	0.00543	0.00535	0.00544	0.00533	0.00535	0.00537	0.00537	0.00538	0.0053	0.00526	0.00518	0.00511	0.005	0.005	0.005	0.00506	0.00502	0.00499	0.00492	0.00487	0.00475	0.00465
2973.68	0.00591	0.00587	0.00605	0.00597	0.0059	0.00581	0.00574	0.00556	0.00548	0.00557	0.00547	0.00549	0.0055	0.0055	0.00551	0.00543	0.00538	0.00531	0.00523	0.00512	0.00513	0.00512	0.00518	0.00514	0.00512	0.00505	0.00499	0.00487	0.00476
2975.6	0.00603	0.00599	0.00618	0.0061	0.00604	0.00594	0.00587	0.00569	0.00561	0.00569	0.00559	0.00561	0.00562	0.00563	0.00564	0.00555	0.0055	0.00542	0.00535	0.00524	0.00525	0.00524	0.0053	0.00526	0.00523	0.00516	0.00511	0.00499	0.00487
2977.53	0.00616	0.00611	0.0063	0.00622	0.00616	0.00606	0.00599	0.0058	0.00572	0.00581	0.00571	0.00572	0.00574	0.00574	0.00576	0.00567	0.00562	0.00553	0.00546	0.00535	0.00535	0.00535	0.00541	0.00538	0.00534	0.00527	0.00521	0.00509	0.00498
2979.46	0.00627	0.00622	0.00642	0.00633	0.00627	0.00617	0.0061	0.00591	0.00582	0.00592	0.00581	0.00583	0.00585	0.00585	0.00586	0.00577	0.00572	0.00563	0.00557	0.00545	0.00545	0.00545	0.00551	0.00548	0.00544	0.00536	0.00531	0.00519	0.00507
2981.39	0.00637	0.00632	0.00652	0.00644	0.00637	0.00627	0.0062	0.00601	0.00592	0.00602	0.00591	0.00593	0.00595	0.00596	0.00596	0.00587	0.00582	0.00573	0.00566	0.00554	0.00554	0.00554	0.00561	0.00557	0.00554	0.00545	0.0054	0.00527	0.00516
2983.32	0.00646	0.00642	0.00662	0.00653	0.00646	0.00637	0.00629	0.00609	0.00601	0.00611	0.006	0.00602	0.00603	0.00605	0.00605	0.00596	0.00591	0.00582	0.00574	0.00563	0.00563	0.00563	0.00569	0.00565	0.00562	0.00554	0.00548	0.00535	0.00524
2985.25	0.00655	0.0065	0.0067	0.00662	0.00655	0.00645	0.00638	0.00618	0.00609	0.00619	0.00608	0.0061	0.00611	0.00613	0.00613	0.00604	0.00599	0.0059	0.00582	0.0057	0.0057	0.0057	0.00577	0.00573	0.0057	0.00561	0.00556	0.00542	0.00531
2987.17	0.00662	0.00657	0.00678	0.00669	0.00662	0.00653	0.00645	0.00625	0.00616	0.00626	0.00615	0.00617	0.00618	0.0062	0.0062	0.00612	0.00606	0.00597	0.00589	0.00577	0.00577	0.00577	0.00584	0.0058	0.00577	0.00568	0.00563	0.00549	0.00537
2989.1	0.00669	0.00664	0.00685	0.00676	0.00669	0.00659	0.00652	0.00631	0.00622	0.00632	0.00621	0.00623	0.00625	0.00626	0.00626	0.00618	0.00612	0.00603	0.00594	0.00583	0.00583	0.00583	0.0059	0.00586	0.00583	0.00574	0.00569	0.00554	0.00542
2991.03	0.00675	0.0067	0.0069	0.00682	0.00675	0.00665	0.00657	0.00637	0.00628	0.00638	0.00627	0.00628	0.0063	0.00631	0.00632	0.00623	0.00618	0.00608	0.006	0.00588	0.00588	0.00588	0.00596	0.00591	0.00588	0.00579	0.00573	0.0056	0.00547
2992.96	0.00679	0.00675	0.00696	0.00687	0.0068	0.0067	0.00662	0.00641	0.00632	0.00642	0.00631	0.00633	0.00635	0.00636	0.00637	0.00628	0.00622	0.00612	0.00605	0.00593	0.00592	0.00592	0.006	0.00596	0.00592	0.00583	0.00578	0.00564	0.00551
2994.89	0.00683	0.00679	0.007	0.00692	0.00684	0.00674	0.00666	0.00645	0.00636	0.00646	0.00635	0.00637	0.00639	0.0064	0.00641	0.00631	0.00626	0.00616	0.00609	0.00596	0.00596	0.00596	0.00604	0.006	0.00596	0.00587	0.00582	0.00568	0.00555
2996.82	0.00687	0.00683	0.00704	0.00695	0.00688	0.00678	0.0067	0.00649	0.0064	0.0065	0.00639	0.00641	0.00642	0.00644	0.00644	0.00635	0.0063	0.00619	0.00612	0.006	0.00599	0.00599	0.00607	0.00603	0.00599	0.00591	0.00585	0.00571	0.00558
2998.74	0.0069	0.00686	0.00707	0.00699	0.00691	0.00681	0.00673	0.00652	0.00643	0.00653	0.00642	0.00644	0.00645	0.00647	0.00647	0.00638	0.00632	0.00622	0.00614	0.00603	0.00602	0.00602	0.0061	0.00605	0.00602	0.00594	0.00588	0.00574	0.00561
3000.67	0.00693	0.00689	0.0071	0.00701	0.00693	0.00683	0.00676	0.00654	0.00645	0.00655	0.00644	0.00646	0.00648	0.00649	0.0065	0.00641	0.00635	0.00625	0.00617	0.00605	0.00605	0.00605	0.00612	0.00608	0.00605	0.00596	0.0059	0.00576	0.00563
3002.6	0.00695	0.00691	0.00712	0.00704	0.00695	0.00686	0.00678	0.00656	0.00647	0.00657	0.00646	0.00648	0.0065	0.00651	0.00652	0.00643	0.00637	0.00627	0.00619	0.00607	0.00607	0.00607	0.00614	0.0061	0.00607	0.00598	0.00592	0.00578	0.00565
3004.53	0.00697	0.00693	0.00714	0.00706	0.00697	0.00688	0.0068	0.00658	0.00649	0.0066	0.00648	0.0065	0.00652	0.00653	0.00654	0.00645	0.00639	0.00629	0.00621	0.00608	0.00609	0.00609	0.00616	0.00612	0.00608	0.006	0.00594	0.0058	0.00567
3006.46	0.00699	0.00695	0.00716	0.00707	0.00699	0.00689	0.00681	0.0066	0.00651	0.00662	0.0065	0.00652	0.00654	0.00655	0.00655	0.00646	0.00641	0.0063	0.00623	0.0061	0.00611	0.0061	0.00618	0.00614	0.0061	0.00601	0.00595	0.00582	0.00568
3008.39	0.007	0.00696	0.00718	0.00709	0.00701	0.00691	0.00683	0.00661	0.00652	0.00663	0.00651	0.00654	0.00655	0.00657	0.00657	0.00648	0.00642	0.00632	0.00624	0.00612	0.00612	0.00611	0.0062	0.00615	0.00612	0.00603	0.00597	0.00583	0.00569
3010.32	0.00701	0.00698	0.00719	0.0071	0.00703	0.00692	0.00684	0.00662	0.00654	0.00664	0.00653	0.00655	0.00657	0.00658	0.00658	0.00649	0.00644	0.00633	0.00626	0.00613	0.00613	0.00613	0.00621	0.00616	0.00613	0.00604	0.00598	0.00584	0.00571
3012.24	0.00702	0.00698	0.00719	0.00711	0.00704	0.00693	0.00685	0.00664	0.00654	0.00665	0.00654	0.00656	0.00657	0.00658	0.0066	0.0065	0.00645	0.00634	0.00627	0.00614	0.00614	0.00614	0.00622	0.00617	0.00614	0.00605	0.00599	0.00585	0.00572
3014.17	0.00703	0.00699	0.0072	0.00712	0.00705	0.00694	0.00686	0.00664	0.00655	0.00666	0.00655	0.00656	0.00658	0.00659	0.0066	0.0065	0.00645	0.00635	0.00627	0.00615	0.00615	0.00615	0.00622	0.00618	0.00614	0.00606	0.006	0.00586	0.00572
3016.1	0.00704	0.00699	0.0072	0.00712	0.00705	0.00694	0.00687	0.00664	0.00655	0.00666	0.00655	0.00656	0.00658	0.0066	0.0066	0.00651	0.00646	0.00635	0.00628	0.00615	0.00616	0.00615	0.00623	0.00618	0.00614	0.00606	0.006	0.00586	0.00573
3018.03	0.00704	0.00699	0.0072	0.00712	0.00705	0.00694	0.00687	0.00664	0.00656	0.00666	0.00655	0.00657	0.00659	0.0066	0.0066	0.00651	0.00646	0.00635	0.00628	0.00615	0.00616	0.00615	0.00623	0.00618	0.00615	0.00606	0.006	0.00586	0.00573
3019.96	0.00704	0.00699	0.0072	0.00712	0.00705	0.00694	0.00687	0.00664	0.00655	0.00666	0.00655	0.00657	0.00658	0.0066	0.0066	0.00651	0.00646	0.00635	0.00628	0.00615	0.00616	0.00615	0.00623	0.00618	0.00615	0.00607	0.006	0.00586	0.00573
3021.89	0.00703	0.00698	0.0072	0.00711	0.00704	0.00694	0.00686	0.00664	0.00655	0.00665	0.00655	0.00656	0.00658	0.0066	0.0066	0.00651	0.00646	0.00634	0.00627	0.00615	0.00615	0.00615	0.00623	0.00618	0.00615	0.00606	0.006	0.00586	0.00573
3023.81	0.00702	0.00698	0.0072	0.0071	0.00703	0.00693	0.00686	0.00663	0.00654	0.00665	0.00654	0.00656	0.00658	0.00659	0.0066	0.00651	0.00645	0.00634	0.00627	0.00615	0.00614	0.00614	0.00622	0.00618	0.00614	0.00606	0.006	0.00586	0.00573
3025.74	0.00701	0.00697	0.00719	0.0071	0.00702	0.00692	0.00685	0.00663	0.00654	0.00664	0.00653	0.00655	0.00657	0.00658	0.00659	0.0065	0.00645	0.00634	0.00627	0.00614	0.00614	0.00614	0.00621	0.00617	0.00614	0.00605	0.00599	0.00585	0.00572
3027.67	0.00701	0.00697	0.00718	0.00709	0.00702	0.00692	0.00684	0.00662	0.00653	0.00664	0.00652	0.00655	0.00657	0.00658	0.00659	0.0065	0.00644	0.00633	0.00626	0.00614	0.00614	0.00613	0.00621	0.00617	0.00613	0.00604	0.00599	0.00585	0.00572
3029.6	0.007	0.00696	0.00718	0.00709	0.00701	0.00691	0.00684	0.00662	0.00652	0.00663	0.00652	0.00654	0.00656	0.00657	0.00658	0.00649	0.00644	0.00633	0.00626	0.00613	0.00613	0.00612	0.00621	0.00616	0.00613	0.00604	0.00598	0.00585	0.00571
3031.53	0.007	0.00695	0.00717	0.00708	0.007	0.0069	0.00683	0.00661	0.00652	0.00663	0.00651	0.00654	0.00655	0.00657	0.00657	0.00648	0.00643	0.00632	0.00625	0.00613	0.00613	0.00612	0.00621	0.00616	0.00612	0.00603	0.00598	0.00584	0.00571
3033.46	0.00699	0.00694	0.00717	0.00707	0.007	0.0069	0.00682	0.00661	0.00651	0.00663	0.00651	0.00653	0.00655	0.00657	0.00657	0.00648	0.00642	0.00632	0.00624	0.00612	0.00612	0.00612	0.0062	0.00615	0.00612	0.00603	0.00598	0.00584	0.00571
3035.39	0.00698	0.00694	0.00716	0.00707	0.00699	0.0069	0.00682	0.0066	0.00651	0.00662	0.00651	0.00653	0.00655	0.00656	0.00656	0.00647	0.00642	0.00631	0.00624	0.00612	0.00612	0.00612	0.0062	0.00615	0.00611	0.00603	0.00598	0.00584	0.00571
3037.31	0.00698	0.00694	0.00715	0.00706	0.00699	0.00689	0.00681	0.0066	0.00651	0.00662	0.0065	0.00652	0.00655	0.00655	0.00656	0.00647	0.00642	0.00631	0.00624	0.00611	0.00612	0.00611	0.00619	0.00615	0.00611	0.00603	0.00597	0.00583	0.0057
3039.24	0.00698	0.00693	0.00715	0.00706	0.00698	0.00689	0.00681	0.0066	0.0065	0.00661	0.0065	0.00652	0.00655	0.00655	0.00656	0.00646	0.00641	0.00631	0.00623	0.00611	0.00611	0.00611	0.00619	0.00615	0.0061	0.00603	0.00597	0.00583	0.0057
3041.17	0.00697	0.00693	0.00715	0.00705	0.00698	0.00688	0.0068	0.00659	0.0065	0.0066	0.00649	0.00652	0.00654	0.00655	0.00655	0.00646	0.00641	0.0063	0.00623	0.00611	0.00611	0.0061	0.00618	0.00614	0.0061	0.00602	0.00596	0.00583	0.00569
3043.1	0.00697	0.00692	0.00714	0.00705	0.00697	0.00688	0.0068	0.00659	0.00649	0.0066	0.00649	0.00651	0.00653	0.00654	0.00655	0.00645	0.00641	0.0063	0.00622	0.0061	0.0061	0.00609	0.00618	0.00613	0.0061	0.00602	0.00596	0.00582	0.00569
3045.03	0.00696	0.00691	0.00713	0.00704	0.00696	0.00687	0.00679	0.00658	0.00648	0.00659	0.00648	0.0065	0.00652	0.00654	0.00654	0.00644	0.0064	0.00629	0.00622	0.00609	0.0061	0.00609	0.00618	0.00613	0.00609	0.00601	0.00596	0.00582	0.00569
3046.96	0.00694	0.0069	0.00712	0.00703	0.00695	0.00686	0.00678	0.00657	0.00647	0.00658	0.00647	0.00649	0.00651	0.00653	0.00653	0.00644	0.00639	0.00628	0.00621	0.00609	0.00609	0.00609	0.00617	0.00612	0.00609	0.006	0.00595	0.00581	0.00568
3048.88	0.00693	0.00689	0.00711	0.00702	0.00694	0.00685	0.00677	0.00656	0.00646	0.00657	0.00646	0.00648	0.0065	0.00652	0.00652	0.00643	0.00638	0.00627	0.0062	0.00608	0.00608	0.00608	0.00616	0.00611	0.00608	0.00599	0.00594	0.0058	0.00568
3050.81	0.00692	0.00687	0.00709	0.00701	0.00693	0.00683	0.00676	0.00655	0.00645	0.00656	0.00645	0.00647	0.00649	0.00651	0.00651	0.00642	0.00637	0.00626	0.00619	0.00607	0.00607	0.00607	0.00615	0.0061	0.00607	0.00598	0.00593	0.00579	0.00566
3052.74	0.00691	0.00687	0.00708	0.00699	0.00692	0.00682	0.00675	0.00653	0.00644	0.00655	0.00644	0.00646	0.00648	0.00649	0.0065	0.00641	0.00636	0.00625	0.00618	0.00606	0.00606	0.00606	0.00613	0.00609	0.00605	0.00597	0.00592	0.00578	0.00565
3054.67	0.00689	0.00685	0.00707	0.00698	0.00691	0.00681	0.00673	0.00652	0.00642	0.00653	0.00642	0.00644	0.00647	0.00648	0.00648	0.00639	0.00635	0.00623	0.00617	0.00604	0.00604	0.00604	0.00612	0.00608	0.00604	0.00596	0.0059	0.00577	0.00564
3056.6	0.00688	0.00684	0.00705	0.00697	0.00689	0.00679	0.00672	0.0065	0.00641	0.00652	0.00641	0.00643	0.00645	0.00647	0.00647	0.00638	0.00634	0.00622	0.00615	0.00603	0.00603	0.00603	0.00611	0.00607	0.00603	0.00595	0.00589	0.00576	0.00563
3058.53	0.00686	0.00682	0.00704	0.00696	0.00688	0.00678	0.00671	0.00649	0.0064	0.00651	0.0064	0.00642	0.00644	0.00645	0.00646	0.00637	0.00632	0.00621	0.00614	0.00602	0.00602	0.00602	0.0061	0.00605	0.00602	0.00593	0.00588	0.00575	0.00562
3060.46	0.00685	0.00681	0.00702	0.00694	0.00686	0.00676	0.0067	0.00648	0.00639	0.0065	0.00639	0.00641	0.00643	0.00644	0.00645	0.00636	0.00631	0.0062	0.00613	0.00601	0.00601	0.00601	0.00609	0.00604	0.00601	0.00593	0.00587	0.00574	0.00561
3062.38	0.00684	0.0068	0.00701	0.00693	0.00685	0.00675	0.00669	0.00646	0.00637	0.00649	0.00638	0.0064	0.00642	0.00643	0.00644	0.00635	0.0063	0.00619	0.00612	0.006	0.006	0.006	0.00608	0.00603	0.006	0.00592	0.00586	0.00573	0.0056
3064.31	0.00683	0.00679	0.007	0.00692	0.00684	0.00674	0.00667	0.00646	0.00636	0.00648	0.00637	0.00639	0.00641	0.00642	0.00643	0.00634	0.00629	0.00618	0.00611	0.00599	0.00599	0.00599	0.00607	0.00602	0.00599	0.00591	0.00585	0.00573	0.0056
3066.24	0.00682	0.00677	0.00699	0.00691	0.00683	0.00674	0.00666	0.00645	0.00636	0.00647	0.00636	0.00638	0.0064	0.00641	0.00642	0.00633	0.00628	0.00617	0.0061	0.00598	0.00599	0.00598	0.00606	0.00602	0.00599	0.0059	0.00585	0.00572	0.00559
3068.17	0.00681	0.00676	0.00698	0.00689	0.00683	0.00673	0.00665	0.00644	0.00635	0.00646	0.00635	0.00637	0.00639	0.0064	0.00641	0.00633	0.00628	0.00617	0.00609	0.00597	0.00598	0.00597	0.00605	0.00601	0.00598	0.00589	0.00584	0.00571	0.00559
3070.1	0.0068	0.00675	0.00697	0.00688	0.00682	0.00672	0.00664	0.00643	0.00634	0.00645	0.00634	0.00636	0.00638	0.00639	0.0064	0.00632	0.00627	0.00616	0.00608	0.00596	0.00597	0.00597	0.00605	0.006	0.00597	0.00588	0.00583	0.0057	0.00558
3072.03	0.00679	0.00674	0.00696	0.00687	0.0068	0.00671	0.00663	0.00642	0.00633	0.00644	0.00633	0.00635	0.00637	0.00638	0.00639	0.0063	0.00626	0.00615	0.00608	0.00596	0.00596	0.00596	0.00604	0.006	0.00596	0.00588	0.00582	0.00569	0.00557
3073.95	0.00678	0.00673	0.00695	0.00686	0.00679	0.00669	0.00662	0.00641	0.00632	0.00643	0.00632	0.00634	0.00636	0.00637	0.00638	0.00629	0.00625	0.00614	0.00607	0.00595	0.00595	0.00595	0.00603	0.00599	0.00596	0.00586	0.00582	0.00568	0.00556
3075.88	0.00677	0.00672	0.00693	0.00685	0.00678	0.00668	0.0066	0.0064	0.00631	0.00641	0.00631	0.00633	0.00635	0.00636	0.00637	0.00628	0.00624	0.00613	0.00606	0.00594	0.00594	0.00594	0.00602	0.00598	0.00595	0.00585	0.00581	0.00567	0.00555
3077.81	0.00675	0.00671	0.00692	0.00683	0.00677	0.00667	0.00659	0.00639	0.00629	0.0064	0.0063	0.00632	0.00634	0.00635	0.00635	0.00627	0.00623	0.00612	0.00605	0.00593	0.00593	0.00593	0.00601	0.00597	0.00593	0.00584	0.0058	0.00566	0.00554
3079.74	0.00673	0.00669	0.0069	0.00682	0.00675	0.00666	0.00658	0.00638	0.00629	0.00639	0.00628	0.00631	0.00633	0.00634	0.00634	0.00626	0.00621	0.00611	0.00604	0.00591	0.00592	0.00592	0.006	0.00595	0.00592	0.00584	0.00578	0.00565	0.00553
3081.67	0.00672	0.00668	0.00688	0.0068	0.00674	0.00664	0.00656	0.00636	0.00627	0.00637	0.00627	0.00629	0.00632	0.00632	0.00633	0.00625	0.0062	0.0061	0.00603	0.0059	0.00591	0.0059	0.00599	0.00594	0.00591	0.00582	0.00577	0.00564	0.00552
3083.6	0.0067	0.00666	0.00686	0.00679	0.00671	0.00662	0.00655	0.00634	0.00626	0.00636	0.00625	0.00628	0.0063	0.00631	0.00631	0.00623	0.00618	0.00608	0.00601	0.00589	0.00589	0.00588	0.00597	0.00593	0.00589	0.00581	0.00575	0.00563	0.00551
3085.53	0.00668	0.00664	0.00684	0.00677	0.00669	0.0066	0.00653	0.00632	0.00624	0.00635	0.00623	0.00626	0.00628	0.00629	0.00629	0.00621	0.00616	0.00606	0.00599	0.00587	0.00588	0.00587	0.00595	0.00591	0.00588	0.00579	0.00574	0.00561	0.00549
3087.45	0.00666	0.00662	0.00682	0.00674	0.00667	0.00658	0.0065	0.0063	0.00622	0.00632	0.00621	0.00623	0.00626	0.00627	0.00628	0.00619	0.00614	0.00604	0.00597	0.00585	0.00586	0.00585	0.00593	0.00589	0.00586	0.00577	0.00572	0.00559	0.00548
3089.38	0.00664	0.0066	0.0068	0.00672	0.00665	0.00655	0.00648	0.00628	0.0062	0.0063	0.00619	0.00621	0.00623	0.00625	0.00626	0.00617	0.00612	0.00602	0.00595	0.00583	0.00584	0.00583	0.00591	0.00587	0.00584	0.00575	0.00571	0.00558	0.00546
3091.31	0.00661	0.00658	0.00678	0.00669	0.00662	0.00653	0.00646	0.00626	0.00617	0.00628	0.00617	0.00619	0.00621	0.00622	0.00624	0.00615	0.0061	0.006	0.00593	0.00582	0.00581	0.00582	0.00589	0.00585	0.00582	0.00574	0.00569	0.00556	0.00544
3093.24	0.00659	0.00656	0.00675	0.00667	0.0066	0.00651	0.00644	0.00624	0.00615	0.00625	0.00615	0.00617	0.00619	0.0062	0.00621	0.00613	0.00608	0.00598	0.00591	0.0058	0.0058	0.0058	0.00587	0.00583	0.0058	0.00572	0.00567	0.00554	0.00542
3095.17	0.00657	0.00653	0.00673	0.00665	0.00658	0.00649	0.00641	0.00622	0.00613	0.00623	0.00613	0.00615	0.00617	0.00618	0.00619	0.00611	0.00606	0.00596	0.00589	0.00577	0.00578	0.00578	0.00585	0.00581	0.00578	0.0057	0.00564	0.00552	0.0054
3097.1	0.00655	0.00651	0.0067	0.00662	0.00655	0.00646	0.00639	0.00619	0.00611	0.00621	0.00611	0.00613	0.00614	0.00616	0.00617	0.00609	0.00604	0.00594	0.00587	0.00575	0.00576	0.00576	0.00583	0.00579	0.00576	0.00568	0.00563	0.0055	0.00539
3099.02	0.00653	0.00648	0.00668	0.0066	0.00653	0.00644	0.00637	0.00617	0.00609	0.00619	0.00609	0.0061	0.00612	0.00613	0.00614	0.00606	0.00601	0.00591	0.00585	0.00573	0.00574	0.00574	0.00581	0.00577	0.00573	0.00566	0.00561	0.00548	0.00537
3100.95	0.0065	0.00646	0.00665	0.00657	0.0065	0.00641	0.00634	0.00614	0.00607	0.00616	0.00606	0.00608	0.0061	0.00611	0.00612	0.00604	0.00599	0.00589	0.00583	0.00571	0.00572	0.00571	0.00579	0.00575	0.00571	0.00564	0.00559	0.00546	0.00535
3102.88	0.00647	0.00643	0.00663	0.00655	0.00647	0.00639	0.00631	0.00612	0.00604	0.00614	0.00604	0.00605	0.00608	0.00608	0.00609	0.00601	0.00597	0.00588	0.0058	0.00569	0.00569	0.00569	0.00577	0.00572	0.00569	0.00562	0.00557	0.00544	0.00533
3104.81	0.00644	0.0064	0.0066	0.00652	0.00645	0.00636	0.00629	0.0061	0.00602	0.00612	0.00601	0.00603	0.00605	0.00606	0.00607	0.00599	0.00595	0.00585	0.00578	0.00567	0.00567	0.00567	0.00575	0.0057	0.00567	0.00559	0.00555	0.00542	0.00531
3106.74	0.00642	0.00637	0.00657	0.00649	0.00642	0.00633	0.00627	0.00607	0.00599	0.0061	0.00599	0.00601	0.00603	0.00604	0.00605	0.00597	0.00592	0.00583	0.00576	0.00565	0.00565	0.00564	0.00573	0.00568	0.00565	0.00557	0.00553	0.0054	0.00529
3108.67	0.00639	0.00635	0.00654	0.00647	0.0064	0.00631	0.00624	0.00605	0.00597	0.00607	0.00597	0.00599	0.006	0.00602	0.00602	0.00595	0.0059	0.00581	0.00574	0.00562	0.00563	0.00562	0.0057	0.00566	0.00563	0.00555	0.00551	0.00538	0.00527
3110.6	0.00637	0.00632	0.00652	0.00644	0.00637	0.00629	0.00622	0.00603	0.00594	0.00605	0.00594	0.00596	0.00598	0.00599	0.006	0.00592	0.00588	0.00578	0.00571	0.0056	0.00561	0.0056	0.00568	0.00564	0.0056	0.00553	0.00548	0.00536	0.00525
3112.52	0.00634	0.0063	0.00649	0.00641	0.00635	0.00626	0.00619	0.006	0.00592	0.00602	0.00592	0.00594	0.00596	0.00597	0.00597	0.0059	0.00585	0.00576	0.00569	0.00558	0.00559	0.00558	0.00565	0.00562	0.00558	0.00551	0.00546	0.00534	0.00523
3114.45	0.00631	0.00627	0.00647	0.00639	0.00632	0.00623	0.00617	0.00597	0.0059	0.00599	0.0059	0.00591	0.00593	0.00595	0.00595	0.00587	0.00583	0.00574	0.00567	0.00555	0.00556	0.00556	0.00563	0.00559	0.00556	0.00548	0.00543	0.00532	0.00521
3116.38	0.00629	0.00625	0.00644	0.00636	0.0063	0.00621	0.00614	0.00595	0.00587	0.00596	0.00587	0.00589	0.00591	0.00593	0.00592	0.00585	0.00581	0.00572	0.00565	0.00553	0.00554	0.00554	0.00561	0.00557	0.00553	0.00546	0.00541	0.0053	0.00519
3118.31	0.00626	0.00622	0.00641	0.00633	0.00627	0.00619	0.00611	0.00593	0.00584	0.00594	0.00585	0.00586	0.00589	0.0059	0.0059	0.00583	0.00578	0.00569	0.00563	0.00551	0.00551	0.00551	0.00559	0.00555	0.00551	0.00544	0.00539	0.00528	0.00516
3120.24	0.00623	0.00619	0.00638	0.00631	0.00624	0.00616	0.00609	0.00591	0.00582	0.00592	0.00582	0.00584	0.00586	0.00588	0.00588	0.0058	0.00576	0.00567	0.0056	0.00549	0.00549	0.00549	0.00557	0.00552	0.00549	0.00542	0.00537	0.00526	0.00515
3122.17	0.00621	0.00617	0.00636	0.00629	0.00622	0.00614	0.00607	0.00588	0.0058	0.0059	0.0058	0.00582	0.00584	0.00585	0.00586	0.00578	0.00574	0.00565	0.00558	0.00547	0.00547	0.00547	0.00554	0.0055	0.00547	0.0054	0.00535	0.00524	0.00513
3124.09	0.00618	0.00615	0.00634	0.00626	0.0062	0.00611	0.00605	0.00586	0.00578	0.00588	0.00577	0.0058	0.00582	0.00583	0.00583	0.00576	0.00572	0.00563	0.00555	0.00545	0.00545	0.00545	0.00552	0.00548	0.00545	0.00538	0.00533	0.00522	0.00511
3126.02	0.00616	0.00613	0.00631	0.00624	0.00617	0.00609	0.00603	0.00584	0.00576	0.00585	0.00575	0.00577	0.0058	0.00581	0.00581	0.00574	0.00569	0.00561	0.00553	0.00543	0.00543	0.00543	0.0055	0.00546	0.00543	0.00536	0.00531	0.0052	0.00509
3127.95	0.00614	0.00611	0.00629	0.00621	0.00615	0.00607	0.006	0.00582	0.00574	0.00583	0.00573	0.00575	0.00577	0.00578	0.00579	0.00572	0.00567	0.00559	0.00552	0.00541	0.00541	0.00541	0.00549	0.00544	0.00541	0.00534	0.00529	0.00518	0.00507
3129.88	0.00612	0.00609	0.00627	0.00619	0.00613	0.00604	0.00598	0.0058	0.00572	0.00581	0.00571	0.00573	0.00575	0.00576	0.00577	0.0057	0.00566	0.00557	0.0055	0.00539	0.00539	0.00539	0.00546	0.00542	0.00539	0.00532	0.00527	0.00516	0.00505
3131.81	0.0061	0.00606	0.00625	0.00616	0.0061	0.00603	0.00596	0.00578	0.00569	0.00579	0.0057	0.00571	0.00573	0.00574	0.00575	0.00568	0.00564	0.00555	0.00548	0.00537	0.00537	0.00537	0.00544	0.00541	0.00537	0.0053	0.00525	0.00514	0.00503
3133.74	0.00607	0.00604	0.00622	0.00614	0.00608	0.00601	0.00594	0.00575	0.00567	0.00577	0.00567	0.00569	0.00571	0.00572	0.00573	0.00566	0.00562	0.00553	0.00546	0.00535	0.00535	0.00535	0.00542	0.00539	0.00536	0.00528	0.00524	0.00513	0.00502
3135.67	0.00605	0.00602	0.0062	0.00612	0.00606	0.00598	0.00592	0.00573	0.00566	0.00575	0.00565	0.00568	0.00569	0.0057	0.00571	0.00564	0.0056	0.00551	0.00544	0.00534	0.00534	0.00533	0.00541	0.00537	0.00534	0.00527	0.00522	0.00511	0.005
3137.59	0.00603	0.006	0.00618	0.0061	0.00604	0.00596	0.0059	0.00571	0.00564	0.00573	0.00563	0.00566	0.00567	0.00569	0.00569	0.00562	0.00558	0.00549	0.00543	0.00532	0.00532	0.00532	0.00539	0.00535	0.00532	0.00525	0.0052	0.00509	0.00499
3139.52	0.00601	0.00598	0.00616	0.00608	0.00602	0.00594	0.00588	0.00569	0.00561	0.00571	0.00562	0.00564	0.00566	0.00567	0.00567	0.0056	0.00556	0.00547	0.00541	0.0053	0.0053	0.0053	0.00537	0.00533	0.00531	0.00524	0.00519	0.00508	0.00497
3141.45	0.00599	0.00596	0.00614	0.00607	0.006	0.00592	0.00586	0.00568	0.00559	0.00569	0.0056	0.00562	0.00564	0.00565	0.00565	0.00558	0.00554	0.00545	0.00538	0.00528	0.00529	0.00528	0.00536	0.00532	0.00529	0.00522	0.00517	0.00506	0.00495
3143.38	0.00597	0.00594	0.00612	0.00605	0.00598	0.0059	0.00584	0.00566	0.00558	0.00568	0.00558	0.0056	0.00562	0.00563	0.00563	0.00556	0.00552	0.00544	0.00536	0.00526	0.00527	0.00527	0.00534	0.0053	0.00527	0.0052	0.00516	0.00505	0.00494
3145.31	0.00595	0.00592	0.0061	0.00602	0.00596	0.00588	0.00582	0.00564	0.00556	0.00566	0.00556	0.00558	0.0056	0.00561	0.00562	0.00554	0.0055	0.00542	0.00535	0.00525	0.00525	0.00525	0.00532	0.00528	0.00525	0.00518	0.00514	0.00503	0.00492
3147.24	0.00593	0.0059	0.00608	0.00601	0.00594	0.00587	0.0058	0.00563	0.00555	0.00564	0.00555	0.00556	0.00558	0.0056	0.0056	0.00553	0.00549	0.0054	0.00534	0.00523	0.00523	0.00523	0.0053	0.00527	0.00524	0.00517	0.00512	0.00502	0.00491
3149.16	0.00592	0.00588	0.00606	0.00599	0.00592	0.00585	0.00578	0.00561	0.00553	0.00562	0.00553	0.00555	0.00557	0.00558	0.00558	0.00551	0.00547	0.00539	0.00532	0.00522	0.00522	0.00522	0.00529	0.00525	0.00522	0.00515	0.00511	0.005	0.0049
3151.09	0.0059	0.00586	0.00604	0.00597	0.0059	0.00583	0.00577	0.00559	0.00551	0.0056	0.00551	0.00553	0.00555	0.00556	0.00557	0.0055	0.00546	0.00537	0.0053	0.0052	0.0052	0.0052	0.00528	0.00524	0.0052	0.00513	0.00509	0.00499	0.00488
3153.02	0.00588	0.00584	0.00602	0.00595	0.00588	0.00581	0.00575	0.00557	0.00549	0.00558	0.00549	0.00551	0.00553	0.00555	0.00555	0.00548	0.00544	0.00535	0.00528	0.00518	0.00519	0.00518	0.00526	0.00522	0.00518	0.00512	0.00507	0.00497	0.00487
3154.95	0.00586	0.00582	0.006	0.00593	0.00587	0.00579	0.00573	0.00555	0.00547	0.00556	0.00547	0.0055	0.00551	0.00553	0.00554	0.00546	0.00542	0.00533	0.00527	0.00516	0.00517	0.00517	0.00524	0.00521	0.00517	0.0051	0.00506	0.00495	0.00485
3156.88	0.00584	0.0058	0.00598	0.00591	0.00585	0.00577	0.00571	0.00553	0.00545	0.00555	0.00546	0.00548	0.0055	0.00551	0.00551	0.00544	0.0054	0.00532	0.00525	0.00515	0.00516	0.00515	0.00522	0.00519	0.00515	0.00509	0.00504	0.00494	0.00484
3158.81	0.00582	0.00578	0.00597	0.00589	0.00583	0.00575	0.00569	0.00551	0.00544	0.00553	0.00544	0.00546	0.00548	0.00549	0.00549	0.00543	0.00539	0.0053	0.00523	0.00513	0.00514	0.00514	0.00521	0.00517	0.00514	0.00507	0.00503	0.00492	0.00482
3160.74	0.0058	0.00577	0.00595	0.00588	0.00581	0.00573	0.00568	0.0055	0.00542	0.00551	0.00543	0.00545	0.00546	0.00548	0.00548	0.00541	0.00537	0.00529	0.00522	0.00512	0.00512	0.00512	0.00519	0.00515	0.00512	0.00506	0.00501	0.00491	0.00481
3162.66	0.00579	0.00575	0.00593	0.00586	0.0058	0.00572	0.00566	0.00548	0.00541	0.00549	0.00541	0.00543	0.00545	0.00546	0.00547	0.0054	0.00536	0.00527	0.0052	0.00511	0.00511	0.00511	0.00518	0.00514	0.00511	0.00505	0.005	0.0049	0.00479
3164.59	0.00577	0.00574	0.00591	0.00584	0.00578	0.0057	0.00565	0.00547	0.00539	0.00548	0.0054	0.00541	0.00543	0.00545	0.00545	0.00538	0.00534	0.00526	0.00519	0.00509	0.0051	0.0051	0.00516	0.00512	0.00509	0.00503	0.00498	0.00488	0.00478
3166.52	0.00575	0.00572	0.00589	0.00583	0.00576	0.00569	0.00563	0.00545	0.00538	0.00547	0.00538	0.0054	0.00542	0.00544	0.00544	0.00537	0.00533	0.00524	0.00518	0.00507	0.00508	0.00508	0.00515	0.00511	0.00508	0.00502	0.00497	0.00487	0.00477
3168.45	0.00574	0.0057	0.00588	0.00581	0.00575	0.00567	0.00561	0.00543	0.00536	0.00546	0.00536	0.00538	0.0054	0.00542	0.00542	0.00535	0.00531	0.00523	0.00517	0.00506	0.00507	0.00506	0.00513	0.0051	0.00507	0.005	0.00496	0.00485	0.00476
3170.38	0.00572	0.00568	0.00586	0.00579	0.00573	0.00565	0.00559	0.00541	0.00534	0.00544	0.00534	0.00536	0.00538	0.00539	0.0054	0.00533	0.0053	0.00521	0.00515	0.00504	0.00505	0.00504	0.00512	0.00508	0.00505	0.00499	0.00494	0.00484	0.00474
3172.31	0.0057	0.00566	0.00584	0.00577	0.00571	0.00563	0.00558	0.00539	0.00532	0.00542	0.00532	0.00535	0.00537	0.00537	0.00538	0.00532	0.00528	0.0052	0.00513	0.00503	0.00503	0.00503	0.0051	0.00507	0.00504	0.00497	0.00493	0.00482	0.00473
3174.23	0.00568	0.00565	0.00582	0.00575	0.00569	0.00561	0.00556	0.00538	0.0053	0.0054	0.00531	0.00533	0.00535	0.00536	0.00536	0.0053	0.00526	0.00518	0.00511	0.00501	0.00502	0.00502	0.00508	0.00505	0.00502	0.00495	0.00491	0.00481	0.00471
3176.16	0.00566	0.00563	0.00579	0.00573	0.00567	0.00559	0.00553	0.00536	0.00529	0.00538	0.00529	0.00531	0.00533	0.00534	0.00535	0.00528	0.00524	0.00516	0.00509	0.005	0.005	0.005	0.00507	0.00504	0.005	0.00494	0.0049	0.00479	0.0047
3178.09	0.00564	0.00561	0.00577	0.00571	0.00565	0.00557	0.00551	0.00535	0.00527	0.00536	0.00527	0.0053	0.00532	0.00532	0.00533	0.00526	0.00523	0.00514	0.00508	0.00498	0.00498	0.00498	0.00505	0.00502	0.00498	0.00492	0.00488	0.00477	0.00468
3180.02	0.00562	0.00559	0.00576	0.00569	0.00563	0.00555	0.0055	0.00533	0.00526	0.00535	0.00526	0.00528	0.0053	0.00531	0.00531	0.00525	0.00521	0.00512	0.00506	0.00497	0.00496	0.00497	0.00503	0.005	0.00497	0.00491	0.00486	0.00476	0.00467
3181.95	0.0056	0.00557	0.00574	0.00567	0.00561	0.00554	0.00548	0.00531	0.00524	0.00533	0.00524	0.00526	0.00528	0.00529	0.00529	0.00523	0.00519	0.00511	0.00504	0.00495	0.00495	0.00495	0.00502	0.00499	0.00495	0.00489	0.00485	0.00474	0.00466
3183.88	0.00558	0.00555	0.00572	0.00565	0.00559	0.00552	0.00546	0.00529	0.00522	0.00531	0.00522	0.00524	0.00526	0.00527	0.00528	0.00521	0.00518	0.00509	0.00503	0.00493	0.00493	0.00493	0.005	0.00497	0.00493	0.00487	0.00483	0.00473	0.00464
3185.8	0.00556	0.00553	0.0057	0.00563	0.00557	0.0055	0.00544	0.00528	0.0052	0.00529	0.0052	0.00522	0.00524	0.00525	0.00526	0.00519	0.00516	0.00507	0.00501	0.00491	0.00492	0.00492	0.00499	0.00496	0.00492	0.00485	0.00482	0.00472	0.00463
3187.73	0.00554	0.00551	0.00568	0.00561	0.00555	0.00548	0.00543	0.00526	0.00519	0.00527	0.00518	0.00521	0.00522	0.00524	0.00524	0.00517	0.00514	0.00506	0.00499	0.0049	0.0049	0.0049	0.00497	0.00494	0.0049	0.00484	0.0048	0.0047	0.00461
3189.66	0.00552	0.00549	0.00566	0.00559	0.00553	0.00546	0.00541	0.00524	0.00517	0.00525	0.00517	0.00519	0.0052	0.00522	0.00522	0.00515	0.00512	0.00504	0.00498	0.00488	0.00489	0.00488	0.00495	0.00492	0.00489	0.00482	0.00478	0.00468	0.00459
3191.59	0.0055	0.00547	0.00564	0.00557	0.00551	0.00544	0.00538	0.00522	0.00515	0.00524	0.00515	0.00517	0.00519	0.0052	0.00521	0.00514	0.0051	0.00502	0.00496	0.00486	0.00487	0.00487	0.00493	0.0049	0.00487	0.00481	0.00477	0.00466	0.00457
3193.52	0.00548	0.00545	0.00562	0.00555	0.00549	0.00542	0.00536	0.0052	0.00513	0.00522	0.00513	0.00515	0.00517	0.00518	0.00519	0.00512	0.00508	0.00501	0.00494	0.00484	0.00485	0.00485	0.00492	0.00488	0.00485	0.00479	0.00475	0.00464	0.00456
3195.45	0.00546	0.00542	0.0056	0.00553	0.00547	0.0054	0.00534	0.00518	0.00511	0.0052	0.00511	0.00513	0.00515	0.00516	0.00517	0.0051	0.00506	0.00499	0.00492	0.00482	0.00483	0.00483	0.0049	0.00486	0.00483	0.00477	0.00473	0.00463	0.00454
3197.38	0.00544	0.0054	0.00557	0.00551	0.00545	0.00538	0.00532	0.00516	0.00509	0.00518	0.00509	0.00511	0.00513	0.00514	0.00514	0.00508	0.00505	0.00497	0.00491	0.00481	0.00481	0.00481	0.00488	0.00484	0.00482	0.00475	0.00472	0.00461	0.00453
3199.3	0.00542	0.00538	0.00555	0.00548	0.00543	0.00536	0.00531	0.00514	0.00507	0.00516	0.00507	0.00509	0.00511	0.00512	0.00512	0.00506	0.00503	0.00495	0.00488	0.00479	0.0048	0.0048	0.00486	0.00482	0.0048	0.00474	0.0047	0.0046	0.00451
3201.23	0.0054	0.00536	0.00553	0.00546	0.00541	0.00534	0.00529	0.00512	0.00505	0.00513	0.00505	0.00507	0.00509	0.0051	0.0051	0.00504	0.00501	0.00493	0.00486	0.00477	0.00478	0.00478	0.00485	0.0048	0.00478	0.00472	0.00468	0.00458	0.00449
3203.16	0.00538	0.00534	0.0055	0.00544	0.00538	0.00531	0.00527	0.0051	0.00503	0.00511	0.00503	0.00505	0.00507	0.00508	0.00508	0.00502	0.00498	0.00491	0.00484	0.00475	0.00476	0.00476	0.00482	0.00479	0.00477	0.0047	0.00466	0.00456	0.00447
3205.09	0.00535	0.00532	0.00548	0.00541	0.00536	0.00529	0.00524	0.00507	0.00501	0.00509	0.00501	0.00503	0.00505	0.00506	0.00506	0.005	0.00496	0.00489	0.00482	0.00473	0.00474	0.00474	0.0048	0.00477	0.00475	0.00469	0.00464	0.00454	0.00445
3207.02	0.00533	0.00529	0.00545	0.00539	0.00533	0.00527	0.00522	0.00505	0.00499	0.00507	0.00499	0.00501	0.00503	0.00503	0.00503	0.00498	0.00494	0.00487	0.0048	0.00471	0.00472	0.00472	0.00478	0.00475	0.00472	0.00466	0.00462	0.00452	0.00444
3208.95	0.0053	0.00527	0.00543	0.00537	0.00531	0.00524	0.00519	0.00503	0.00496	0.00505	0.00496	0.00498	0.005	0.00501	0.00501	0.00496	0.00492	0.00485	0.00478	0.00469	0.0047	0.0047	0.00476	0.00473	0.0047	0.00464	0.0046	0.00451	0.00442
3210.87	0.00528	0.00525	0.00541	0.00534	0.00529	0.00522	0.00516	0.00501	0.00494	0.00502	0.00494	0.00496	0.00498	0.00499	0.00499	0.00494	0.0049	0.00483	0.00476	0.00467	0.00468	0.00468	0.00474	0.00471	0.00468	0.00462	0.00458	0.00449	0.0044
3212.8	0.00526	0.00522	0.00539	0.00532	0.00527	0.0052	0.00514	0.00499	0.00492	0.005	0.00492	0.00494	0.00495	0.00497	0.00497	0.00492	0.00488	0.00481	0.00475	0.00465	0.00466	0.00466	0.00472	0.00469	0.00466	0.0046	0.00456	0.00447	0.00438
3214.73	0.00524	0.0052	0.00537	0.0053	0.00525	0.00518	0.00512	0.00497	0.0049	0.00498	0.0049	0.00492	0.00494	0.00495	0.00495	0.0049	0.00486	0.00479	0.00473	0.00463	0.00464	0.00464	0.00471	0.00467	0.00464	0.00458	0.00455	0.00445	0.00437
3216.66	0.00522	0.00518	0.00535	0.00528	0.00523	0.00516	0.0051	0.00495	0.00488	0.00496	0.00488	0.0049	0.00492	0.00493	0.00494	0.00488	0.00484	0.00477	0.00471	0.00462	0.00462	0.00463	0.00469	0.00465	0.00462	0.00457	0.00453	0.00443	0.00435
3218.59	0.0052	0.00516	0.00533	0.00527	0.00521	0.00514	0.00508	0.00493	0.00487	0.00495	0.00487	0.00489	0.0049	0.00492	0.00492	0.00486	0.00483	0.00475	0.00469	0.0046	0.00461	0.00461	0.00467	0.00464	0.00461	0.00455	0.00452	0.00442	0.00434
3220.52	0.00519	0.00515	0.00532	0.00525	0.00519	0.00513	0.00507	0.00492	0.00485	0.00493	0.00486	0.00487	0.00489	0.0049	0.00491	0.00485	0.00481	0.00474	0.00469	0.00459	0.0046	0.0046	0.00466	0.00463	0.0046	0.00454	0.0045	0.00441	0.00432
3222.45	0.00518	0.00514	0.00531	0.00524	0.00518	0.00512	0.00506	0.00491	0.00484	0.00492	0.00485	0.00487	0.00488	0.00489	0.0049	0.00484	0.0048	0.00473	0.00468	0.00458	0.00458	0.00458	0.00465	0.00462	0.00459	0.00453	0.00449	0.0044	0.00432
3224.37	0.00516	0.00514	0.00529	0.00523	0.00517	0.00511	0.00505	0.0049	0.00483	0.00492	0.00484	0.00486	0.00487	0.00488	0.00489	0.00483	0.0048	0.00472	0.00467	0.00458	0.00458	0.00458	0.00465	0.00461	0.00458	0.00452	0.00449	0.00439	0.00431
3226.3	0.00515	0.00513	0.00528	0.00523	0.00517	0.0051	0.00505	0.00489	0.00482	0.00491	0.00483	0.00485	0.00486	0.00488	0.00489	0.00482	0.00479	0.00471	0.00466	0.00457	0.00457	0.00457	0.00464	0.0046	0.00457	0.00451	0.00448	0.00439	0.00431
3228.23	0.00515	0.00512	0.00528	0.00522	0.00516	0.00509	0.00504	0.00488	0.00482	0.0049	0.00483	0.00485	0.00486	0.00488	0.00488	0.00482	0.00479	0.00471	0.00466	0.00456	0.00457	0.00457	0.00463	0.0046	0.00457	0.00451	0.00448	0.00438	0.0043
3230.16	0.00514	0.00511	0.00527	0.00521	0.00516	0.00508	0.00503	0.00488	0.00482	0.0049	0.00482	0.00484	0.00485	0.00487	0.00488	0.00481	0.00478	0.0047	0.00465	0.00455	0.00456	0.00456	0.00463	0.00459	0.00456	0.0045	0.00447	0.00438	0.0043
3232.09	0.00514	0.0051	0.00527	0.0052	0.00515	0.00508	0.00503	0.00488	0.00481	0.0049	0.00482	0.00484	0.00485	0.00487	0.00487	0.00481	0.00478	0.0047	0.00464	0.00455	0.00455	0.00456	0.00462	0.00459	0.00456	0.0045	0.00447	0.00437	0.00429
3234.02	0.00513	0.0051	0.00527	0.00519	0.00515	0.00508	0.00503	0.00487	0.00481	0.00489	0.00481	0.00484	0.00485	0.00487	0.00487	0.0048	0.00477	0.00469	0.00464	0.00455	0.00455	0.00455	0.00462	0.00459	0.00456	0.0045	0.00446	0.00437	0.00429
3235.94	0.00513	0.0051	0.00526	0.00519	0.00514	0.00508	0.00503	0.00487	0.0048	0.00489	0.00481	0.00483	0.00485	0.00486	0.00486	0.0048	0.00477	0.00469	0.00463	0.00454	0.00455	0.00455	0.00461	0.00459	0.00455	0.0045	0.00446	0.00437	0.00429
3237.87	0.00513	0.0051	0.00526	0.00519	0.00514	0.00508	0.00502	0.00486	0.0048	0.00488	0.00481	0.00482	0.00485	0.00485	0.00486	0.0048	0.00477	0.00469	0.00463	0.00454	0.00455	0.00455	0.00461	0.00458	0.00455	0.0045	0.00446	0.00437	0.00429
3239.8	0.00513	0.00509	0.00526	0.00519	0.00513	0.00507	0.00502	0.00486	0.0048	0.00488	0.0048	0.00482	0.00484	0.00485	0.00485	0.0048	0.00477	0.00469	0.00463	0.00454	0.00455	0.00455	0.00461	0.00458	0.00455	0.00449	0.00445	0.00436	0.00429
3241.73	0.00512	0.00509	0.00525	0.00519	0.00513	0.00506	0.00502	0.00486	0.00479	0.00488	0.0048	0.00482	0.00484	0.00484	0.00485	0.00479	0.00477	0.00469	0.00463	0.00454	0.00454	0.00455	0.00461	0.00458	0.00455	0.00449	0.00445	0.00436	0.00428
3243.66	0.00512	0.00509	0.00525	0.00519	0.00513	0.00506	0.00501	0.00485	0.00479	0.00488	0.0048	0.00482	0.00483	0.00484	0.00485	0.00479	0.00477	0.00468	0.00463	0.00454	0.00454	0.00455	0.00461	0.00457	0.00455	0.00449	0.00445	0.00436	0.00428
3245.59	0.00512	0.00508	0.00525	0.00518	0.00513	0.00506	0.00501	0.00485	0.00478	0.00487	0.00479	0.00481	0.00483	0.00484	0.00485	0.00479	0.00476	0.00468	0.00462	0.00453	0.00454	0.00454	0.00461	0.00457	0.00455	0.00448	0.00445	0.00436	0.00428
3247.52	0.00512	0.00508	0.00524	0.00518	0.00513	0.00506	0.005	0.00485	0.00478	0.00487	0.00479	0.00481	0.00483	0.00484	0.00485	0.00479	0.00476	0.00468	0.00462	0.00453	0.00454	0.00454	0.0046	0.00457	0.00454	0.00448	0.00445	0.00436	0.00428
3249.44	0.00511	0.00508	0.00524	0.00517	0.00513	0.00506	0.005	0.00485	0.00478	0.00487	0.00479	0.00481	0.00483	0.00484	0.00484	0.00479	0.00476	0.00468	0.00462	0.00453	0.00454	0.00454	0.0046	0.00457	0.00454	0.00448	0.00445	0.00436	0.00428
3251.37	0.00511	0.00508	0.00524	0.00517	0.00512	0.00505	0.005	0.00485	0.00478	0.00487	0.00479	0.00481	0.00483	0.00484	0.00484	0.00479	0.00476	0.00468	0.00462	0.00453	0.00454	0.00453	0.0046	0.00457	0.00454	0.00448	0.00445	0.00436	0.00428
3253.3	0.0051	0.00507	0.00523	0.00516	0.00512	0.00505	0.005	0.00484	0.00478	0.00487	0.00479	0.00481	0.00482	0.00484	0.00484	0.00478	0.00475	0.00468	0.00461	0.00453	0.00454	0.00453	0.0046	0.00457	0.00454	0.00448	0.00445	0.00436	0.00428
3255.23	0.0051	0.00507	0.00523	0.00516	0.00512	0.00505	0.005	0.00484	0.00477	0.00486	0.00479	0.0048	0.00482	0.00483	0.00484	0.00478	0.00475	0.00468	0.00461	0.00453	0.00453	0.00453	0.0046	0.00457	0.00454	0.00448	0.00445	0.00436	0.00428
3257.16	0.0051	0.00506	0.00522	0.00516	0.00511	0.00504	0.005	0.00484	0.00477	0.00486	0.00479	0.0048	0.00482	0.00483	0.00484	0.00478	0.00475	0.00467	0.00461	0.00452	0.00453	0.00453	0.0046	0.00456	0.00453	0.00448	0.00445	0.00436	0.00428
3259.09	0.0051	0.00506	0.00522	0.00516	0.00511	0.00504	0.00499	0.00484	0.00477	0.00486	0.00478	0.0048	0.00482	0.00483	0.00484	0.00478	0.00475	0.00467	0.00461	0.00452	0.00453	0.00453	0.0046	0.00456	0.00453	0.00447	0.00444	0.00436	0.00428
3261.01	0.00509	0.00506	0.00522	0.00516	0.0051	0.00504	0.00499	0.00484	0.00477	0.00486	0.00478	0.0048	0.00482	0.00483	0.00484	0.00478	0.00475	0.00467	0.00461	0.00452	0.00453	0.00453	0.00459	0.00456	0.00453	0.00447	0.00444	0.00436	0.00427
3262.94	0.00509	0.00506	0.00522	0.00516	0.0051	0.00503	0.00499	0.00483	0.00476	0.00486	0.00478	0.0048	0.00482	0.00483	0.00484	0.00478	0.00474	0.00466	0.00461	0.00452	0.00453	0.00453	0.00459	0.00456	0.00453	0.00447	0.00444	0.00436	0.00427
3264.87	0.00509	0.00506	0.00522	0.00516	0.00511	0.00503	0.00499	0.00483	0.00476	0.00485	0.00478	0.0048	0.00481	0.00483	0.00484	0.00478	0.00474	0.00466	0.00461	0.00452	0.00453	0.00453	0.00459	0.00456	0.00453	0.00447	0.00444	0.00435	0.00428
3266.8	0.00509	0.00506	0.00522	0.00515	0.00511	0.00503	0.00499	0.00483	0.00476	0.00485	0.00478	0.0048	0.00481	0.00483	0.00484	0.00477	0.00474	0.00467	0.00461	0.00452	0.00453	0.00453	0.00459	0.00456	0.00453	0.00447	0.00444	0.00435	0.00428
3268.73	0.00508	0.00506	0.00522	0.00515	0.0051	0.00503	0.00499	0.00483	0.00476	0.00485	0.00478	0.0048	0.00481	0.00482	0.00483	0.00478	0.00475	0.00466	0.00461	0.00451	0.00453	0.00453	0.00459	0.00456	0.00453	0.00447	0.00444	0.00435	0.00428
3270.66	0.00508	0.00506	0.00522	0.00515	0.0051	0.00503	0.00498	0.00483	0.00476	0.00485	0.00478	0.0048	0.00481	0.00482	0.00483	0.00478	0.00475	0.00466	0.00461	0.00451	0.00453	0.00453	0.00459	0.00456	0.00453	0.00448	0.00444	0.00435	0.00428
3272.59	0.00508	0.00506	0.00522	0.00515	0.0051	0.00503	0.00498	0.00483	0.00476	0.00485	0.00478	0.0048	0.00482	0.00483	0.00483	0.00477	0.00475	0.00466	0.00461	0.00452	0.00453	0.00452	0.00459	0.00456	0.00453	0.00448	0.00444	0.00435	0.00428
3274.51	0.00509	0.00506	0.00522	0.00515	0.0051	0.00503	0.00498	0.00483	0.00476	0.00486	0.00478	0.0048	0.00482	0.00483	0.00483	0.00477	0.00475	0.00466	0.00461	0.00452	0.00453	0.00452	0.00459	0.00456	0.00453	0.00448	0.00444	0.00435	0.00428
3276.44	0.00509	0.00505	0.00522	0.00515	0.0051	0.00503	0.00499	0.00483	0.00476	0.00485	0.00478	0.0048	0.00482	0.00483	0.00483	0.00477	0.00475	0.00466	0.00461	0.00452	0.00453	0.00453	0.0046	0.00456	0.00453	0.00447	0.00444	0.00435	0.00428
3278.37	0.00509	0.00505	0.00522	0.00515	0.0051	0.00503	0.00498	0.00483	0.00476	0.00485	0.00478	0.00479	0.00481	0.00482	0.00483	0.00477	0.00475	0.00466	0.00461	0.00452	0.00453	0.00453	0.0046	0.00456	0.00453	0.00447	0.00444	0.00435	0.00428
3280.3	0.00508	0.00505	0.00522	0.00515	0.0051	0.00504	0.00498	0.00483	0.00476	0.00485	0.00477	0.00479	0.00481	0.00482	0.00482	0.00477	0.00474	0.00466	0.00461	0.00452	0.00453	0.00453	0.00459	0.00456	0.00454	0.00448	0.00445	0.00435	0.00428
3282.23	0.00508	0.00505	0.00522	0.00515	0.0051	0.00504	0.00498	0.00483	0.00476	0.00485	0.00477	0.0048	0.00482	0.00483	0.00483	0.00477	0.00474	0.00466	0.00461	0.00452	0.00453	0.00453	0.00459	0.00457	0.00454	0.00448	0.00445	0.00435	0.00428
3284.16	0.00508	0.00505	0.00522	0.00515	0.0051	0.00503	0.00499	0.00483	0.00476	0.00485	0.00477	0.0048	0.00482	0.00483	0.00483	0.00478	0.00475	0.00466	0.00461	0.00452	0.00453	0.00453	0.00459	0.00457	0.00454	0.00448	0.00445	0.00436	0.00428
3286.08	0.00508	0.00505	0.00522	0.00515	0.0051	0.00503	0.00499	0.00483	0.00476	0.00485	0.00477	0.0048	0.00482	0.00483	0.00483	0.00478	0.00475	0.00467	0.00461	0.00452	0.00453	0.00453	0.00459	0.00457	0.00454	0.00448	0.00445	0.00436	0.00428
3288.01	0.00508	0.00505	0.00522	0.00515	0.0051	0.00503	0.00499	0.00483	0.00476	0.00485	0.00478	0.0048	0.00482	0.00483	0.00483	0.00478	0.00475	0.00467	0.00461	0.00453	0.00453	0.00453	0.00459	0.00456	0.00454	0.00448	0.00445	0.00436	0.00428
3289.94	0.00508	0.00505	0.00522	0.00515	0.0051	0.00503	0.00499	0.00483	0.00476	0.00486	0.00478	0.0048	0.00482	0.00483	0.00483	0.00478	0.00475	0.00467	0.00461	0.00453	0.00453	0.00453	0.0046	0.00457	0.00454	0.00448	0.00445	0.00436	0.00429
3291.87	0.00509	0.00505	0.00522	0.00515	0.0051	0.00504	0.00499	0.00483	0.00476	0.00486	0.00478	0.0048	0.00482	0.00483	0.00483	0.00478	0.00475	0.00467	0.00462	0.00453	0.00453	0.00454	0.0046	0.00457	0.00454	0.00449	0.00445	0.00437	0.00429
3293.8	0.00508	0.00506	0.00522	0.00515	0.0051	0.00504	0.00499	0.00483	0.00476	0.00486	0.00478	0.0048	0.00482	0.00484	0.00483	0.00478	0.00475	0.00468	0.00462	0.00453	0.00454	0.00454	0.00461	0.00457	0.00454	0.00449	0.00445	0.00437	0.00429
3295.73	0.00508	0.00505	0.00522	0.00515	0.0051	0.00504	0.00499	0.00483	0.00476	0.00486	0.00478	0.0048	0.00482	0.00484	0.00483	0.00479	0.00475	0.00468	0.00462	0.00453	0.00454	0.00454	0.00461	0.00457	0.00454	0.00449	0.00446	0.00436	0.00429
3297.66	0.00509	0.00505	0.00522	0.00515	0.0051	0.00504	0.00499	0.00483	0.00476	0.00486	0.00478	0.0048	0.00482	0.00483	0.00484	0.00478	0.00476	0.00468	0.00462	0.00453	0.00454	0.00454	0.00461	0.00457	0.00454	0.00449	0.00446	0.00437	0.00429
3299.58	0.00509	0.00505	0.00522	0.00515	0.0051	0.00504	0.00499	0.00483	0.00476	0.00486	0.00478	0.0048	0.00482	0.00483	0.00484	0.00478	0.00476	0.00467	0.00462	0.00453	0.00454	0.00454	0.00461	0.00457	0.00454	0.00449	0.00446	0.00437	0.00429
3301.51	0.00508	0.00505	0.00522	0.00515	0.0051	0.00504	0.00499	0.00483	0.00476	0.00486	0.00478	0.0048	0.00482	0.00483	0.00484	0.00478	0.00475	0.00467	0.00463	0.00453	0.00454	0.00454	0.00461	0.00457	0.00454	0.00449	0.00446	0.00437	0.00429
3303.44	0.00508	0.00505	0.00522	0.00515	0.0051	0.00503	0.00499	0.00483	0.00476	0.00486	0.00477	0.0048	0.00482	0.00483	0.00484	0.00478	0.00475	0.00467	0.00462	0.00453	0.00454	0.00454	0.0046	0.00457	0.00454	0.00449	0.00445	0.00436	0.00429
3305.37	0.00508	0.00505	0.00522	0.00514	0.0051	0.00503	0.00499	0.00483	0.00476	0.00486	0.00477	0.0048	0.00482	0.00483	0.00483	0.00478	0.00475	0.00466	0.00462	0.00453	0.00453	0.00454	0.0046	0.00457	0.00454	0.00449	0.00445	0.00437	0.00429
3307.3	0.00508	0.00504	0.00521	0.00514	0.0051	0.00503	0.00499	0.00483	0.00476	0.00486	0.00478	0.0048	0.00482	0.00483	0.00483	0.00478	0.00475	0.00466	0.00461	0.00453	0.00453	0.00454	0.0046	0.00457	0.00454	0.00449	0.00446	0.00437	0.00429
3309.23	0.00508	0.00504	0.00521	0.00514	0.00509	0.00503	0.00499	0.00482	0.00476	0.00485	0.00477	0.00479	0.00481	0.00483	0.00483	0.00478	0.00475	0.00467	0.00461	0.00453	0.00453	0.00454	0.0046	0.00457	0.00454	0.00449	0.00446	0.00437	0.0043
3311.15	0.00507	0.00504	0.00521	0.00514	0.00509	0.00503	0.00498	0.00482	0.00475	0.00485	0.00477	0.00479	0.00481	0.00483	0.00483	0.00478	0.00475	0.00467	0.00461	0.00453	0.00453	0.00454	0.00461	0.00457	0.00454	0.00449	0.00445	0.00437	0.0043
3313.08	0.00507	0.00504	0.00521	0.00514	0.00509	0.00503	0.00498	0.00482	0.00475	0.00485	0.00477	0.00479	0.00481	0.00483	0.00483	0.00478	0.00475	0.00466	0.00461	0.00452	0.00453	0.00454	0.0046	0.00457	0.00454	0.00449	0.00446	0.00437	0.0043
3315.01	0.00507	0.00504	0.00521	0.00514	0.00508	0.00502	0.00498	0.00482	0.00475	0.00485	0.00476	0.00479	0.00482	0.00483	0.00483	0.00478	0.00475	0.00466	0.00461	0.00452	0.00453	0.00453	0.0046	0.00457	0.00454	0.00449	0.00446	0.00437	0.0043
3316.94	0.00507	0.00504	0.0052	0.00513	0.00508	0.00502	0.00498	0.00482	0.00475	0.00485	0.00476	0.00479	0.00481	0.00482	0.00483	0.00478	0.00474	0.00466	0.00461	0.00452	0.00453	0.00453	0.0046	0.00457	0.00454	0.00449	0.00445	0.00437	0.0043
3318.87	0.00506	0.00504	0.0052	0.00513	0.00508	0.00502	0.00497	0.00481	0.00475	0.00484	0.00476	0.00479	0.00481	0.00482	0.00482	0.00477	0.00474	0.00466	0.00461	0.00452	0.00453	0.00453	0.00461	0.00457	0.00454	0.00449	0.00445	0.00436	0.00429
3320.8	0.00506	0.00503	0.00519	0.00513	0.00508	0.00502	0.00497	0.00481	0.00474	0.00484	0.00476	0.00479	0.00481	0.00481	0.00482	0.00477	0.00474	0.00466	0.00461	0.00452	0.00453	0.00453	0.00461	0.00457	0.00453	0.00449	0.00445	0.00436	0.00429
3322.73	0.00506	0.00503	0.00519	0.00512	0.00507	0.00501	0.00497	0.00481	0.00474	0.00484	0.00476	0.00478	0.00481	0.00481	0.00482	0.00477	0.00474	0.00465	0.00461	0.00452	0.00452	0.00453	0.0046	0.00456	0.00453	0.00448	0.00445	0.00436	0.00429
3324.65	0.00505	0.00502	0.00518	0.00512	0.00507	0.00501	0.00496	0.0048	0.00474	0.00483	0.00476	0.00478	0.0048	0.00481	0.00482	0.00477	0.00473	0.00465	0.00461	0.00452	0.00452	0.00453	0.0046	0.00456	0.00453	0.00448	0.00445	0.00436	0.00429
3326.58	0.00505	0.00502	0.00518	0.00511	0.00507	0.005	0.00496	0.0048	0.00473	0.00483	0.00475	0.00478	0.0048	0.00481	0.00482	0.00476	0.00473	0.00465	0.00461	0.00452	0.00452	0.00453	0.00459	0.00456	0.00453	0.00448	0.00444	0.00436	0.00429
3328.51	0.00504	0.00501	0.00517	0.00511	0.00506	0.005	0.00495	0.00479	0.00473	0.00483	0.00475	0.00477	0.00479	0.00481	0.00481	0.00476	0.00473	0.00464	0.0046	0.00451	0.00452	0.00452	0.00459	0.00456	0.00453	0.00447	0.00444	0.00436	0.00429
3330.44	0.00504	0.00501	0.00517	0.00511	0.00506	0.00499	0.00494	0.00479	0.00472	0.00482	0.00474	0.00477	0.00479	0.0048	0.00481	0.00475	0.00473	0.00464	0.0046	0.00451	0.00452	0.00452	0.00459	0.00455	0.00453	0.00447	0.00444	0.00435	0.00429
3332.37	0.00503	0.005	0.00516	0.0051	0.00505	0.00499	0.00494	0.00478	0.00472	0.00481	0.00473	0.00476	0.00478	0.0048	0.0048	0.00475	0.00472	0.00464	0.00459	0.0045	0.00451	0.00451	0.00458	0.00454	0.00452	0.00447	0.00443	0.00435	0.00428
3334.3	0.00502	0.005	0.00516	0.00509	0.00505	0.00498	0.00494	0.00478	0.00472	0.00481	0.00473	0.00476	0.00478	0.00479	0.00479	0.00474	0.00472	0.00463	0.00458	0.0045	0.0045	0.00451	0.00458	0.00454	0.00452	0.00447	0.00443	0.00435	0.00428
3336.22	0.00502	0.00499	0.00516	0.00508	0.00504	0.00498	0.00493	0.00477	0.00471	0.00481	0.00472	0.00475	0.00477	0.00478	0.00479	0.00474	0.00471	0.00463	0.00458	0.00449	0.0045	0.0045	0.00457	0.00454	0.00451	0.00446	0.00442	0.00434	0.00428
3338.15	0.00501	0.00498	0.00515	0.00508	0.00504	0.00497	0.00493	0.00477	0.0047	0.0048	0.00472	0.00475	0.00477	0.00478	0.00479	0.00473	0.0047	0.00463	0.00458	0.00449	0.00449	0.0045	0.00456	0.00453	0.00451	0.00446	0.00442	0.00434	0.00428
3340.08	0.005	0.00497	0.00514	0.00507	0.00503	0.00496	0.00492	0.00476	0.0047	0.00479	0.00472	0.00474	0.00476	0.00478	0.00478	0.00473	0.0047	0.00462	0.00457	0.00448	0.00449	0.00449	0.00456	0.00453	0.0045	0.00445	0.00442	0.00433	0.00427
3342.01	0.005	0.00496	0.00513	0.00506	0.00502	0.00495	0.00491	0.00476	0.00469	0.00479	0.00471	0.00473	0.00476	0.00477	0.00478	0.00472	0.0047	0.00461	0.00457	0.00448	0.00448	0.00449	0.00455	0.00453	0.0045	0.00444	0.00441	0.00433	0.00427
3343.94	0.00499	0.00496	0.00512	0.00506	0.00501	0.00495	0.0049	0.00475	0.00468	0.00478	0.0047	0.00473	0.00475	0.00476	0.00477	0.00471	0.00469	0.00461	0.00457	0.00447	0.00448	0.00448	0.00455	0.00452	0.00449	0.00444	0.00441	0.00433	0.00426
3345.87	0.00498	0.00495	0.00511	0.00505	0.005	0.00494	0.00489	0.00474	0.00468	0.00477	0.0047	0.00472	0.00474	0.00476	0.00476	0.00471	0.00468	0.00461	0.00456	0.00447	0.00447	0.00448	0.00454	0.00452	0.00449	0.00443	0.00441	0.00432	0.00426
3347.8	0.00498	0.00495	0.00511	0.00504	0.00499	0.00493	0.00489	0.00473	0.00467	0.00477	0.00469	0.00472	0.00473	0.00475	0.00476	0.0047	0.00468	0.0046	0.00455	0.00446	0.00447	0.00447	0.00454	0.00451	0.00448	0.00443	0.0044	0.00432	0.00425
3349.72	0.00497	0.00494	0.0051	0.00503	0.00498	0.00492	0.00488	0.00473	0.00466	0.00476	0.00469	0.00471	0.00473	0.00474	0.00475	0.0047	0.00467	0.00459	0.00454	0.00446	0.00446	0.00446	0.00454	0.0045	0.00447	0.00443	0.00439	0.00431	0.00425
3351.65	0.00496	0.00493	0.00509	0.00502	0.00497	0.00491	0.00487	0.00472	0.00465	0.00475	0.00468	0.0047	0.00472	0.00473	0.00474	0.00469	0.00466	0.00458	0.00454	0.00445	0.00445	0.00446	0.00453	0.0045	0.00446	0.00442	0.00439	0.0043	0.00424
3353.58	0.00495	0.00492	0.00508	0.00501	0.00496	0.0049	0.00487	0.00471	0.00465	0.00474	0.00467	0.00469	0.00471	0.00472	0.00473	0.00468	0.00465	0.00458	0.00453	0.00444	0.00445	0.00445	0.00452	0.00449	0.00446	0.00441	0.00438	0.0043	0.00424
3355.51	0.00494	0.00491	0.00508	0.00501	0.00495	0.0049	0.00486	0.0047	0.00464	0.00473	0.00466	0.00468	0.0047	0.00472	0.00473	0.00467	0.00464	0.00457	0.00453	0.00444	0.00445	0.00444	0.00452	0.00449	0.00445	0.00441	0.00438	0.00429	0.00423
3357.44	0.00493	0.0049	0.00507	0.005	0.00494	0.00489	0.00486	0.00469	0.00463	0.00473	0.00465	0.00468	0.0047	0.00471	0.00472	0.00467	0.00464	0.00456	0.00451	0.00443	0.00444	0.00444	0.00451	0.00448	0.00445	0.0044	0.00437	0.00429	0.00422
3359.37	0.00492	0.00489	0.00505	0.00499	0.00494	0.00488	0.00484	0.00469	0.00462	0.00472	0.00464	0.00467	0.00469	0.0047	0.00471	0.00466	0.00463	0.00455	0.00451	0.00443	0.00443	0.00443	0.0045	0.00447	0.00445	0.00439	0.00436	0.00429	0.00422
3361.29	0.00492	0.00489	0.00504	0.00498	0.00493	0.00487	0.00483	0.00468	0.00461	0.00471	0.00464	0.00466	0.00468	0.0047	0.0047	0.00466	0.00462	0.00455	0.00451	0.00442	0.00442	0.00443	0.00449	0.00446	0.00444	0.00439	0.00436	0.00428	0.00422
3363.22	0.00491	0.00489	0.00504	0.00497	0.00492	0.00487	0.00482	0.00468	0.00461	0.0047	0.00463	0.00465	0.00468	0.00469	0.0047	0.00465	0.00462	0.00455	0.0045	0.00441	0.00442	0.00442	0.00449	0.00446	0.00443	0.00438	0.00435	0.00428	0.00421
3365.15	0.0049	0.00488	0.00503	0.00496	0.00492	0.00486	0.00482	0.00467	0.0046	0.0047	0.00463	0.00465	0.00467	0.00468	0.00469	0.00464	0.00462	0.00454	0.0045	0.00441	0.00441	0.00442	0.00448	0.00445	0.00443	0.00438	0.00435	0.00428	0.00421
3367.08	0.0049	0.00487	0.00502	0.00495	0.00491	0.00485	0.00481	0.00466	0.00459	0.00469	0.00462	0.00464	0.00467	0.00468	0.00469	0.00464	0.00462	0.00453	0.00449	0.0044	0.00441	0.00441	0.00448	0.00445	0.00442	0.00438	0.00435	0.00427	0.0042
3369.01	0.00489	0.00486	0.00502	0.00495	0.0049	0.00485	0.00481	0.00465	0.00459	0.00469	0.00462	0.00464	0.00466	0.00467	0.00468	0.00463	0.00461	0.00453	0.00449	0.0044	0.00441	0.00441	0.00448	0.00445	0.00442	0.00437	0.00434	0.00427	0.0042
3370.94	0.00488	0.00485	0.00501	0.00494	0.0049	0.00484	0.0048	0.00465	0.00459	0.00468	0.00461	0.00463	0.00466	0.00467	0.00467	0.00462	0.0046	0.00452	0.00448	0.0044	0.0044	0.00441	0.00447	0.00444	0.00441	0.00437	0.00434	0.00426	0.0042
3372.86	0.00487	0.00485	0.005	0.00494	0.00489	0.00484	0.00479	0.00464	0.00458	0.00468	0.0046	0.00463	0.00465	0.00466	0.00467	0.00462	0.0046	0.00452	0.00447	0.0044	0.0044	0.0044	0.00447	0.00444	0.00441	0.00436	0.00433	0.00425	0.0042
3374.79	0.00487	0.00484	0.00499	0.00493	0.00489	0.00484	0.00479	0.00464	0.00457	0.00467	0.0046	0.00462	0.00464	0.00466	0.00466	0.00462	0.00459	0.00451	0.00446	0.00439	0.00439	0.0044	0.00446	0.00443	0.0044	0.00436	0.00433	0.00425	0.00419
3376.72	0.00486	0.00483	0.00498	0.00492	0.00488	0.00483	0.00478	0.00463	0.00457	0.00466	0.00459	0.00462	0.00464	0.00465	0.00466	0.00461	0.00459	0.0045	0.00446	0.00438	0.00439	0.00439	0.00446	0.00443	0.0044	0.00436	0.00433	0.00424	0.00418
3378.65	0.00485	0.00482	0.00498	0.00492	0.00487	0.00482	0.00478	0.00462	0.00456	0.00466	0.00459	0.00461	0.00463	0.00465	0.00465	0.0046	0.00458	0.0045	0.00446	0.00437	0.00438	0.00438	0.00446	0.00442	0.00439	0.00435	0.00432	0.00424	0.00418
3380.58	0.00485	0.00481	0.00497	0.00491	0.00486	0.00481	0.00477	0.00462	0.00456	0.00466	0.00458	0.00461	0.00463	0.00464	0.00464	0.0046	0.00458	0.00449	0.00445	0.00437	0.00437	0.00438	0.00445	0.00442	0.00439	0.00435	0.00432	0.00423	0.00418
3382.51	0.00484	0.00481	0.00497	0.00491	0.00485	0.00481	0.00476	0.00461	0.00456	0.00465	0.00457	0.0046	0.00462	0.00464	0.00464	0.00459	0.00457	0.00449	0.00445	0.00436	0.00437	0.00438	0.00445	0.00442	0.00438	0.00434	0.00431	0.00423	0.00417
3384.44	0.00483	0.00481	0.00496	0.0049	0.00485	0.0048	0.00476	0.00461	0.00455	0.00465	0.00457	0.00459	0.00462	0.00463	0.00464	0.00459	0.00457	0.00449	0.00444	0.00436	0.00436	0.00437	0.00444	0.00442	0.00438	0.00434	0.00431	0.00423	0.00417
3386.36	0.00483	0.00481	0.00496	0.0049	0.00485	0.00479	0.00475	0.00461	0.00454	0.00464	0.00457	0.00459	0.00461	0.00463	0.00463	0.00459	0.00456	0.00449	0.00444	0.00436	0.00436	0.00437	0.00444	0.00441	0.00438	0.00433	0.00431	0.00423	0.00417
3388.29	0.00483	0.0048	0.00496	0.00489	0.00485	0.00479	0.00475	0.00461	0.00454	0.00464	0.00457	0.00459	0.00461	0.00463	0.00463	0.00459	0.00456	0.00449	0.00444	0.00436	0.00436	0.00437	0.00444	0.00441	0.00438	0.00433	0.00431	0.00423	0.00417
3390.22	0.00483	0.0048	0.00496	0.0049	0.00485	0.00479	0.00475	0.00461	0.00454	0.00464	0.00457	0.00459	0.00461	0.00463	0.00463	0.00459	0.00456	0.00449	0.00444	0.00436	0.00437	0.00437	0.00444	0.00441	0.00438	0.00433	0.00431	0.00423	0.00417
3392.15	0.00483	0.0048	0.00496	0.0049	0.00485	0.0048	0.00475	0.00461	0.00454	0.00464	0.00457	0.00459	0.00462	0.00463	0.00463	0.00459	0.00457	0.00449	0.00444	0.00436	0.00437	0.00437	0.00444	0.00441	0.00438	0.00433	0.00431	0.00423	0.00417
3394.08	0.00483	0.0048	0.00496	0.0049	0.00485	0.0048	0.00475	0.00461	0.00455	0.00464	0.00457	0.00459	0.00462	0.00463	0.00463	0.00459	0.00457	0.00449	0.00445	0.00436	0.00437	0.00437	0.00444	0.00441	0.00438	0.00433	0.00431	0.00423	0.00417
3396.01	0.00483	0.0048	0.00496	0.0049	0.00485	0.0048	0.00476	0.00461	0.00455	0.00465	0.00457	0.00459	0.00462	0.00463	0.00463	0.0046	0.00457	0.00449	0.00445	0.00436	0.00437	0.00437	0.00444	0.00441	0.00438	0.00434	0.00431	0.00423	0.00417
3397.93	0.00483	0.00481	0.00497	0.0049	0.00485	0.0048	0.00476	0.00461	0.00455	0.00465	0.00457	0.0046	0.00462	0.00463	0.00464	0.0046	0.00457	0.00449	0.00445	0.00436	0.00437	0.00438	0.00444	0.00441	0.00439	0.00434	0.00432	0.00423	0.00417
3399.86	0.00483	0.00481	0.00497	0.00491	0.00486	0.0048	0.00476	0.00461	0.00455	0.00465	0.00458	0.0046	0.00462	0.00463	0.00464	0.0046	0.00457	0.00449	0.00445	0.00436	0.00437	0.00438	0.00444	0.00442	0.00439	0.00435	0.00432	0.00424	0.00418
3401.79	0.00484	0.00482	0.00498	0.00491	0.00487	0.00481	0.00477	0.00462	0.00455	0.00465	0.00458	0.00461	0.00463	0.00463	0.00464	0.0046	0.00458	0.0045	0.00445	0.00437	0.00438	0.00439	0.00445	0.00442	0.0044	0.00435	0.00432	0.00424	0.00418
3403.72	0.00485	0.00482	0.00498	0.00492	0.00487	0.00481	0.00477	0.00462	0.00456	0.00466	0.00459	0.00462	0.00464	0.00464	0.00465	0.00461	0.00459	0.0045	0.00446	0.00437	0.00438	0.00439	0.00445	0.00443	0.0044	0.00435	0.00433	0.00424	0.00419
3405.65	0.00486	0.00483	0.00499	0.00492	0.00488	0.00482	0.00478	0.00463	0.00457	0.00466	0.00459	0.00462	0.00464	0.00465	0.00466	0.00462	0.00459	0.00451	0.00447	0.00438	0.00439	0.0044	0.00446	0.00443	0.00441	0.00436	0.00433	0.00425	0.0042
3407.58	0.00486	0.00483	0.005	0.00493	0.00489	0.00483	0.00479	0.00464	0.00457	0.00467	0.0046	0.00463	0.00465	0.00466	0.00467	0.00462	0.0046	0.00451	0.00448	0.00439	0.0044	0.0044	0.00447	0.00444	0.00441	0.00436	0.00434	0.00425	0.0042
3409.51	0.00487	0.00484	0.00501	0.00494	0.0049	0.00483	0.00479	0.00465	0.00458	0.00468	0.00461	0.00463	0.00466	0.00467	0.00468	0.00463	0.0046	0.00452	0.00449	0.00439	0.0044	0.00441	0.00447	0.00444	0.00442	0.00437	0.00434	0.00426	0.00421
3411.43	0.00488	0.00485	0.00501	0.00495	0.0049	0.00484	0.0048	0.00466	0.00459	0.00469	0.00462	0.00464	0.00466	0.00467	0.00469	0.00463	0.00461	0.00453	0.00449	0.0044	0.00441	0.00442	0.00448	0.00445	0.00442	0.00438	0.00435	0.00427	0.00421
3413.36	0.00488	0.00486	0.00502	0.00496	0.0049	0.00485	0.00481	0.00466	0.00459	0.0047	0.00462	0.00465	0.00467	0.00468	0.00469	0.00464	0.00462	0.00454	0.0045	0.00441	0.00442	0.00443	0.00449	0.00446	0.00443	0.00439	0.00436	0.00428	0.00422
3415.29	0.00489	0.00487	0.00503	0.00497	0.00491	0.00486	0.00482	0.00467	0.0046	0.0047	0.00463	0.00465	0.00468	0.00469	0.0047	0.00465	0.00463	0.00454	0.0045	0.00442	0.00442	0.00444	0.0045	0.00447	0.00444	0.00439	0.00436	0.00429	0.00423
3417.22	0.0049	0.00488	0.00504	0.00497	0.00493	0.00487	0.00483	0.00468	0.00461	0.00471	0.00464	0.00466	0.00469	0.0047	0.0047	0.00466	0.00463	0.00455	0.00451	0.00442	0.00443	0.00444	0.00451	0.00448	0.00445	0.0044	0.00437	0.0043	0.00424
3419.15	0.00491	0.00489	0.00505	0.00499	0.00494	0.00488	0.00484	0.00468	0.00462	0.00472	0.00465	0.00467	0.00469	0.00471	0.00471	0.00466	0.00464	0.00456	0.00451	0.00443	0.00444	0.00445	0.00452	0.00448	0.00446	0.00441	0.00438	0.0043	0.00424
3421.08	0.00492	0.0049	0.00506	0.005	0.00495	0.00488	0.00484	0.00469	0.00463	0.00473	0.00465	0.00468	0.0047	0.00471	0.00472	0.00467	0.00465	0.00457	0.00452	0.00444	0.00445	0.00446	0.00452	0.00449	0.00447	0.00442	0.00439	0.00431	0.00425
3423	0.00493	0.0049	0.00507	0.005	0.00496	0.00489	0.00485	0.0047	0.00464	0.00473	0.00466	0.00469	0.00471	0.00472	0.00473	0.00468	0.00466	0.00458	0.00454	0.00445	0.00446	0.00446	0.00453	0.0045	0.00447	0.00443	0.0044	0.00432	0.00426
3424.93	0.00494	0.00491	0.00508	0.00501	0.00497	0.0049	0.00487	0.00471	0.00464	0.00474	0.00467	0.0047	0.00472	0.00473	0.00474	0.00469	0.00467	0.00459	0.00454	0.00445	0.00446	0.00447	0.00453	0.00451	0.00448	0.00443	0.0044	0.00432	0.00427
3426.86	0.00495	0.00492	0.00509	0.00502	0.00497	0.00491	0.00488	0.00472	0.00465	0.00475	0.00468	0.0047	0.00473	0.00474	0.00474	0.0047	0.00467	0.00459	0.00455	0.00446	0.00447	0.00447	0.00454	0.00451	0.00449	0.00444	0.00441	0.00433	0.00427
3428.79	0.00495	0.00493	0.00509	0.00503	0.00498	0.00492	0.00488	0.00472	0.00466	0.00476	0.00468	0.00471	0.00473	0.00474	0.00475	0.00471	0.00468	0.0046	0.00455	0.00447	0.00448	0.00448	0.00455	0.00452	0.00449	0.00445	0.00442	0.00434	0.00428
3430.72	0.00496	0.00493	0.00511	0.00504	0.00498	0.00492	0.00489	0.00473	0.00467	0.00477	0.00469	0.00472	0.00474	0.00475	0.00476	0.00471	0.00469	0.0046	0.00455	0.00448	0.00448	0.00449	0.00456	0.00453	0.0045	0.00445	0.00442	0.00434	0.00428
3432.65	0.00497	0.00494	0.00511	0.00504	0.00499	0.00493	0.00489	0.00473	0.00467	0.00478	0.0047	0.00472	0.00474	0.00476	0.00477	0.00472	0.00469	0.00461	0.00456	0.00448	0.00449	0.0045	0.00456	0.00454	0.00451	0.00446	0.00443	0.00435	0.00429
3434.58	0.00498	0.00495	0.00512	0.00505	0.005	0.00494	0.0049	0.00475	0.00468	0.00478	0.00471	0.00474	0.00475	0.00477	0.00478	0.00472	0.0047	0.00462	0.00457	0.00449	0.0045	0.0045	0.00457	0.00454	0.00451	0.00447	0.00444	0.00436	0.0043
3436.5	0.00499	0.00496	0.00513	0.00506	0.00501	0.00495	0.00491	0.00476	0.00469	0.00479	0.00472	0.00475	0.00476	0.00478	0.00478	0.00474	0.00471	0.00463	0.0046	0.0045	0.0045	0.00451	0.00458	0.00455	0.00452	0.00447	0.00444	0.00436	0.0043
3438.43	0.00499	0.00497	0.00514	0.00507	0.00503	0.00496	0.00492	0.00477	0.0047	0.00479	0.00473	0.00475	0.00477	0.00479	0.00479	0.00475	0.00472	0.00464	0.00461	0.0045	0.00451	0.00452	0.0046	0.00456	0.00453	0.00448	0.00445	0.00437	0.00431
3440.36	0.005	0.00498	0.00515	0.00508	0.00504	0.00497	0.00493	0.00477	0.00471	0.0048	0.00474	0.00476	0.00478	0.0048	0.00481	0.00476	0.00473	0.00465	0.00462	0.00451	0.00452	0.00453	0.00461	0.00457	0.00454	0.00449	0.00446	0.00438	0.00432
3442.29	0.00501	0.00499	0.00516	0.00509	0.00505	0.00498	0.00494	0.00478	0.00472	0.00482	0.00474	0.00477	0.0048	0.00481	0.00482	0.00477	0.00474	0.00466	0.00462	0.00452	0.00454	0.00454	0.00461	0.00457	0.00455	0.0045	0.00447	0.00439	0.00433
3444.22	0.00502	0.005	0.00518	0.0051	0.00505	0.005	0.00495	0.00479	0.00472	0.00483	0.00475	0.00478	0.0048	0.00482	0.00482	0.00477	0.00475	0.00467	0.00463	0.00453	0.00455	0.00455	0.00461	0.00458	0.00456	0.00451	0.00448	0.0044	0.00434
3446.15	0.00503	0.00501	0.00519	0.00511	0.00506	0.00501	0.00496	0.0048	0.00473	0.00484	0.00476	0.00479	0.00481	0.00483	0.00483	0.00479	0.00476	0.00468	0.00464	0.00454	0.00455	0.00456	0.00462	0.00459	0.00457	0.00452	0.00449	0.00441	0.00435
3448.07	0.00505	0.00502	0.0052	0.00513	0.00507	0.00501	0.00497	0.00481	0.00474	0.00485	0.00478	0.0048	0.00483	0.00484	0.00484	0.0048	0.00477	0.00469	0.00465	0.00455	0.00456	0.00457	0.00464	0.00461	0.00458	0.00453	0.0045	0.00442	0.00436
3450	0.00506	0.00503	0.00521	0.00514	0.00509	0.00502	0.00499	0.00482	0.00476	0.00486	0.00479	0.00481	0.00483	0.00485	0.00486	0.00481	0.00478	0.0047	0.00466	0.00456	0.00457	0.00458	0.00465	0.00462	0.0046	0.00454	0.00451	0.00443	0.00437
3451.93	0.00508	0.00504	0.00522	0.00515	0.00509	0.00504	0.005	0.00483	0.00477	0.00487	0.0048	0.00482	0.00484	0.00486	0.00487	0.00482	0.00479	0.00471	0.00467	0.00457	0.00458	0.00459	0.00466	0.00463	0.0046	0.00455	0.00452	0.00444	0.00437
3453.86	0.00509	0.00505	0.00523	0.00516	0.0051	0.00505	0.00501	0.00484	0.00478	0.00488	0.00481	0.00483	0.00485	0.00487	0.00487	0.00483	0.0048	0.00471	0.00467	0.00458	0.00459	0.0046	0.00466	0.00464	0.00461	0.00456	0.00453	0.00445	0.00438
3455.79	0.0051	0.00506	0.00524	0.00517	0.00511	0.00506	0.00502	0.00485	0.00478	0.00489	0.00481	0.00484	0.00486	0.00488	0.00488	0.00483	0.0048	0.00472	0.00467	0.00459	0.0046	0.00461	0.00466	0.00465	0.00461	0.00456	0.00453	0.00446	0.00439
3457.72	0.0051	0.00507	0.00525	0.00518	0.00513	0.00507	0.00503	0.00486	0.00479	0.0049	0.00482	0.00485	0.00487	0.00489	0.00489	0.00484	0.00481	0.00473	0.00468	0.00459	0.00461	0.00462	0.00467	0.00466	0.00462	0.00457	0.00454	0.00446	0.0044
3459.65	0.00511	0.00508	0.00525	0.00519	0.00514	0.00508	0.00503	0.00487	0.0048	0.00491	0.00483	0.00486	0.00488	0.00489	0.0049	0.00485	0.00482	0.00474	0.00468	0.0046	0.00461	0.00462	0.00468	0.00467	0.00463	0.00459	0.00455	0.00447	0.00441
3461.57	0.00512	0.00509	0.00526	0.00519	0.00514	0.00508	0.00504	0.00488	0.00481	0.00492	0.00484	0.00487	0.00489	0.0049	0.00491	0.00486	0.00483	0.00474	0.0047	0.00461	0.00462	0.00463	0.0047	0.00468	0.00464	0.00459	0.00456	0.00448	0.00441
3463.5	0.00513	0.0051	0.00527	0.0052	0.00515	0.00509	0.00504	0.00488	0.00482	0.00492	0.00484	0.00488	0.0049	0.00491	0.00492	0.00487	0.00485	0.00475	0.00471	0.00461	0.00463	0.00463	0.0047	0.00468	0.00465	0.0046	0.00457	0.00449	0.00442
3465.43	0.00513	0.00511	0.00528	0.0052	0.00516	0.0051	0.00505	0.00489	0.00482	0.00493	0.00485	0.00488	0.0049	0.00492	0.00493	0.00487	0.00485	0.00476	0.00472	0.00462	0.00464	0.00464	0.00471	0.00468	0.00465	0.0046	0.00457	0.00449	0.00443
3467.36	0.00513	0.00511	0.00529	0.00521	0.00517	0.0051	0.00506	0.00489	0.00483	0.00493	0.00486	0.00489	0.00491	0.00493	0.00493	0.00488	0.00486	0.00476	0.00473	0.00463	0.00465	0.00465	0.00471	0.00469	0.00466	0.00461	0.00458	0.0045	0.00444
3469.29	0.00514	0.00512	0.0053	0.00522	0.00517	0.00511	0.00507	0.0049	0.00483	0.00494	0.00486	0.00489	0.00492	0.00493	0.00494	0.00488	0.00486	0.00477	0.00474	0.00464	0.00466	0.00465	0.00472	0.0047	0.00467	0.00461	0.00459	0.0045	0.00444
3471.22	0.00515	0.00513	0.0053	0.00523	0.00518	0.00512	0.00507	0.00491	0.00484	0.00495	0.00487	0.0049	0.00492	0.00494	0.00494	0.00489	0.00487	0.00478	0.00475	0.00465	0.00466	0.00466	0.00473	0.00471	0.00468	0.00462	0.0046	0.00451	0.00445
3473.14	0.00516	0.00514	0.00531	0.00524	0.00518	0.00513	0.00508	0.00492	0.00485	0.00496	0.00488	0.00491	0.00493	0.00495	0.00495	0.0049	0.00488	0.00478	0.00477	0.00465	0.00467	0.00467	0.00474	0.00472	0.00468	0.00463	0.0046	0.00452	0.00446
3475.07	0.00516	0.00514	0.00532	0.00525	0.00519	0.00513	0.00509	0.00493	0.00486	0.00497	0.00489	0.00491	0.00493	0.00496	0.00496	0.00491	0.00489	0.00479	0.00478	0.00466	0.00468	0.00467	0.00475	0.00473	0.00469	0.00464	0.00461	0.00453	0.00447
3477	0.00517	0.00515	0.00533	0.00526	0.0052	0.00514	0.0051	0.00494	0.00487	0.00498	0.0049	0.00492	0.00494	0.00496	0.00496	0.00492	0.0049	0.0048	0.00478	0.00467	0.00468	0.00467	0.00476	0.00474	0.0047	0.00464	0.00462	0.00454	0.00447
3478.93	0.00518	0.00516	0.00534	0.00526	0.00521	0.00515	0.00511	0.00494	0.00487	0.00498	0.0049	0.00493	0.00496	0.00497	0.00497	0.00492	0.0049	0.00481	0.00478	0.00468	0.00469	0.00468	0.00476	0.00474	0.00471	0.00465	0.00463	0.00454	0.00448
3480.86	0.00519	0.00516	0.00535	0.00527	0.00522	0.00516	0.00511	0.00495	0.00488	0.00499	0.00491	0.00494	0.00497	0.00498	0.00498	0.00494	0.00491	0.00482	0.00478	0.00469	0.00469	0.00469	0.00477	0.00474	0.00471	0.00466	0.00463	0.00455	0.00449
3482.79	0.0052	0.00517	0.00536	0.00528	0.00523	0.00517	0.00512	0.00496	0.00489	0.00499	0.00492	0.00495	0.00498	0.00498	0.00499	0.00495	0.00492	0.00483	0.00479	0.00469	0.0047	0.0047	0.00478	0.00474	0.00471	0.00467	0.00464	0.00456	0.0045
3484.72	0.00521	0.00517	0.00537	0.00529	0.00524	0.00518	0.00513	0.00497	0.0049	0.005	0.00493	0.00495	0.00499	0.00499	0.005	0.00496	0.00492	0.00483	0.00479	0.0047	0.0047	0.00471	0.00479	0.00475	0.00472	0.00467	0.00465	0.00456	0.00451
3486.64	0.00522	0.00519	0.00538	0.00529	0.00525	0.00519	0.00514	0.00498	0.0049	0.00501	0.00493	0.00496	0.00499	0.005	0.00501	0.00496	0.00493	0.00484	0.0048	0.0047	0.00471	0.00472	0.0048	0.00476	0.00473	0.00468	0.00465	0.00457	0.00451
3488.57	0.00523	0.00521	0.00539	0.0053	0.00526	0.0052	0.00515	0.00498	0.00491	0.00502	0.00494	0.00497	0.005	0.00501	0.00502	0.00497	0.00494	0.00485	0.00481	0.00472	0.00473	0.00473	0.00481	0.00478	0.00473	0.00468	0.00466	0.00458	0.00452
3490.5	0.00524	0.00522	0.0054	0.00532	0.00527	0.00521	0.00516	0.00499	0.00492	0.00503	0.00496	0.00498	0.00501	0.00502	0.00502	0.00497	0.00495	0.00486	0.00482	0.00473	0.00474	0.00474	0.00482	0.00479	0.00474	0.00469	0.00467	0.00459	0.00453
3492.43	0.00525	0.00522	0.00541	0.00533	0.00528	0.00521	0.00516	0.005	0.00493	0.00504	0.00498	0.00499	0.00502	0.00503	0.00503	0.00498	0.00496	0.00486	0.00483	0.00474	0.00475	0.00474	0.00482	0.00479	0.00475	0.0047	0.00468	0.0046	0.00453
3494.36	0.00525	0.00522	0.00542	0.00535	0.00529	0.00522	0.00517	0.00501	0.00493	0.00505	0.00498	0.005	0.00502	0.00504	0.00504	0.00499	0.00497	0.00487	0.00484	0.00474	0.00476	0.00475	0.00483	0.0048	0.00477	0.00471	0.00469	0.0046	0.00454
3496.29	0.00526	0.00523	0.00542	0.00535	0.00529	0.00523	0.00518	0.00502	0.00494	0.00506	0.00498	0.00501	0.00503	0.00505	0.00505	0.005	0.00498	0.00488	0.00484	0.00475	0.00477	0.00476	0.00484	0.00481	0.00478	0.00472	0.0047	0.00461	0.00455
3498.21	0.00527	0.00523	0.00542	0.00536	0.0053	0.00524	0.0052	0.00502	0.00495	0.00506	0.00498	0.00501	0.00504	0.00505	0.00506	0.00501	0.00498	0.00489	0.00484	0.00475	0.00477	0.00478	0.00485	0.00482	0.00479	0.00474	0.0047	0.00462	0.00456
3500.14	0.00528	0.00524	0.00543	0.00536	0.00531	0.00524	0.00521	0.00503	0.00496	0.00507	0.005	0.00502	0.00504	0.00506	0.00508	0.00502	0.00499	0.0049	0.00485	0.00476	0.00477	0.00479	0.00486	0.00482	0.0048	0.00474	0.00471	0.00463	0.00457
3502.07	0.00529	0.00525	0.00544	0.00536	0.00532	0.00525	0.00522	0.00504	0.00497	0.00509	0.00501	0.00503	0.00505	0.00506	0.00508	0.00503	0.005	0.00491	0.00487	0.00477	0.00477	0.00479	0.00487	0.00483	0.0048	0.00475	0.00472	0.00464	0.00458
3504	0.00529	0.00526	0.00545	0.00537	0.00532	0.00525	0.00523	0.00505	0.00498	0.0051	0.00501	0.00504	0.00505	0.00507	0.00509	0.00504	0.00501	0.00492	0.00487	0.00478	0.00478	0.00479	0.00487	0.00483	0.00481	0.00476	0.00473	0.00465	0.00458
3505.93	0.0053	0.00527	0.00545	0.00538	0.00532	0.00526	0.00523	0.00506	0.00499	0.0051	0.00501	0.00505	0.00506	0.00509	0.0051	0.00504	0.00501	0.00492	0.00488	0.00479	0.0048	0.0048	0.00488	0.00484	0.00481	0.00477	0.00474	0.00465	0.00459
3507.86	0.00531	0.00528	0.00546	0.00539	0.00532	0.00528	0.00524	0.00507	0.00499	0.0051	0.00502	0.00505	0.00507	0.00509	0.0051	0.00504	0.00502	0.00493	0.00489	0.0048	0.0048	0.0048	0.00488	0.00485	0.00482	0.00478	0.00475	0.00466	0.0046
3509.79	0.00532	0.00529	0.00547	0.00539	0.00533	0.00529	0.00524	0.00507	0.005	0.00511	0.00502	0.00506	0.00508	0.00509	0.00511	0.00505	0.00503	0.00494	0.0049	0.0048	0.00481	0.00481	0.00489	0.00486	0.00483	0.00478	0.00475	0.00467	0.0046
3511.71	0.00532	0.0053	0.00547	0.0054	0.00535	0.00529	0.00524	0.00508	0.00501	0.00512	0.00503	0.00507	0.00509	0.0051	0.00511	0.00505	0.00504	0.00495	0.00491	0.00481	0.00482	0.00482	0.00489	0.00487	0.00484	0.00479	0.00476	0.00467	0.00461
3513.64	0.00533	0.00531	0.00548	0.00541	0.00536	0.0053	0.00525	0.00508	0.00502	0.00512	0.00504	0.00508	0.0051	0.00511	0.00512	0.00506	0.00504	0.00495	0.00492	0.00482	0.00483	0.00483	0.0049	0.00487	0.00485	0.00479	0.00477	0.00468	0.00462
3515.57	0.00534	0.00531	0.00549	0.00542	0.00538	0.00531	0.00526	0.00508	0.00502	0.00513	0.00505	0.00509	0.00511	0.00512	0.00513	0.00507	0.00505	0.00495	0.00492	0.00483	0.00484	0.00483	0.00491	0.00488	0.00485	0.0048	0.00477	0.00469	0.00463
3517.5	0.00535	0.00532	0.0055	0.00542	0.00538	0.00532	0.00527	0.00509	0.00503	0.00513	0.00506	0.0051	0.00512	0.00513	0.00513	0.00508	0.00505	0.00496	0.00492	0.00483	0.00484	0.00484	0.00492	0.00489	0.00486	0.0048	0.00477	0.0047	0.00464
3519.43	0.00535	0.00532	0.0055	0.00542	0.00538	0.00532	0.00528	0.0051	0.00503	0.00514	0.00507	0.0051	0.00512	0.00513	0.00514	0.00508	0.00506	0.00497	0.00492	0.00483	0.00485	0.00485	0.00493	0.00489	0.00486	0.00481	0.00478	0.0047	0.00464
3521.36	0.00536	0.00532	0.00551	0.00543	0.00538	0.00533	0.00529	0.00511	0.00504	0.00515	0.00507	0.0051	0.00513	0.00513	0.00514	0.00509	0.00506	0.00498	0.00493	0.00484	0.00486	0.00485	0.00494	0.0049	0.00487	0.00482	0.00479	0.0047	0.00464
3523.28	0.00536	0.00533	0.00552	0.00543	0.00539	0.00534	0.0053	0.00512	0.00505	0.00516	0.00507	0.00511	0.00513	0.00514	0.00515	0.0051	0.00507	0.00499	0.00494	0.00484	0.00486	0.00486	0.00494	0.0049	0.00488	0.00482	0.0048	0.0047	0.00465
3525.21	0.00537	0.00534	0.00552	0.00544	0.0054	0.00534	0.0053	0.00512	0.00506	0.00516	0.00508	0.00511	0.00514	0.00515	0.00515	0.00511	0.00508	0.00499	0.00495	0.00485	0.00487	0.00486	0.00495	0.00491	0.00488	0.00482	0.0048	0.00471	0.00466
3527.14	0.00537	0.00534	0.00552	0.00545	0.00541	0.00534	0.0053	0.00512	0.00506	0.00517	0.00509	0.00512	0.00514	0.00516	0.00516	0.00512	0.00509	0.00499	0.00496	0.00485	0.00487	0.00487	0.00495	0.00491	0.00489	0.00483	0.00481	0.00472	0.00466
3529.07	0.00538	0.00535	0.00553	0.00546	0.00541	0.00535	0.0053	0.00513	0.00506	0.00517	0.0051	0.00512	0.00515	0.00516	0.00517	0.00512	0.00509	0.005	0.00496	0.00486	0.00487	0.00488	0.00496	0.00492	0.00489	0.00484	0.00481	0.00473	0.00467
3531	0.00539	0.00536	0.00554	0.00547	0.00542	0.00536	0.00531	0.00514	0.00507	0.00518	0.0051	0.00512	0.00515	0.00517	0.00518	0.00513	0.0051	0.00501	0.00497	0.00487	0.00488	0.00489	0.00497	0.00493	0.0049	0.00485	0.00482	0.00473	0.00467
3532.93	0.00539	0.00537	0.00555	0.00548	0.00543	0.00537	0.00532	0.00515	0.00507	0.00519	0.00511	0.00513	0.00516	0.00518	0.00519	0.00514	0.00511	0.00501	0.00497	0.00488	0.00489	0.0049	0.00497	0.00493	0.00491	0.00485	0.00483	0.00474	0.00467
3534.86	0.0054	0.00537	0.00556	0.00548	0.00543	0.00537	0.00532	0.00515	0.00508	0.00519	0.00511	0.00514	0.00517	0.00518	0.00519	0.00514	0.00511	0.00502	0.00498	0.00488	0.00489	0.00491	0.00498	0.00494	0.00491	0.00486	0.00484	0.00475	0.00468
3536.78	0.00541	0.00538	0.00557	0.00549	0.00543	0.00538	0.00533	0.00516	0.00508	0.00519	0.00512	0.00515	0.00518	0.00519	0.0052	0.00515	0.00512	0.00503	0.00499	0.00489	0.0049	0.00491	0.00499	0.00495	0.00492	0.00487	0.00484	0.00475	0.00469
3538.71	0.00542	0.00538	0.00558	0.0055	0.00544	0.00539	0.00533	0.00517	0.00509	0.0052	0.00512	0.00516	0.00518	0.0052	0.0052	0.00516	0.00513	0.00504	0.005	0.00489	0.00491	0.00491	0.00499	0.00496	0.00493	0.00488	0.00485	0.00476	0.0047
3540.64	0.00543	0.00539	0.00558	0.0055	0.00545	0.00539	0.00534	0.00517	0.00511	0.00521	0.00513	0.00516	0.00519	0.00521	0.00521	0.00517	0.00513	0.00505	0.005	0.0049	0.00492	0.00492	0.005	0.00496	0.00493	0.00489	0.00485	0.00477	0.0047
3542.57	0.00544	0.0054	0.00559	0.00551	0.00546	0.0054	0.00535	0.00518	0.00511	0.00522	0.00514	0.00517	0.0052	0.00522	0.00522	0.00518	0.00514	0.00505	0.00501	0.00491	0.00492	0.00492	0.00501	0.00497	0.00494	0.0049	0.00486	0.00478	0.00471
3544.5	0.00545	0.00541	0.0056	0.00552	0.00547	0.00541	0.00536	0.00519	0.00512	0.00523	0.00515	0.00518	0.00521	0.00523	0.00523	0.00518	0.00515	0.00505	0.00502	0.00492	0.00493	0.00493	0.00502	0.00498	0.00495	0.0049	0.00487	0.00479	0.00472
3546.43	0.00545	0.00542	0.00561	0.00553	0.00548	0.00541	0.00537	0.00519	0.00513	0.00524	0.00516	0.00519	0.00522	0.00523	0.00524	0.00519	0.00516	0.00506	0.00503	0.00492	0.00493	0.00494	0.00502	0.00499	0.00496	0.00491	0.00488	0.00479	0.00473
3548.35	0.00546	0.00543	0.00562	0.00554	0.00548	0.00542	0.00538	0.0052	0.00513	0.00525	0.00517	0.00519	0.00522	0.00524	0.00525	0.00519	0.00517	0.00507	0.00503	0.00493	0.00494	0.00495	0.00503	0.005	0.00497	0.00492	0.00489	0.0048	0.00474
3550.28	0.00547	0.00544	0.00563	0.00555	0.0055	0.00543	0.00538	0.00521	0.00514	0.00525	0.00518	0.0052	0.00523	0.00524	0.00525	0.0052	0.00518	0.00508	0.00504	0.00494	0.00495	0.00496	0.00504	0.00501	0.00497	0.00492	0.00489	0.00481	0.00474
3552.21	0.00548	0.00545	0.00563	0.00556	0.0055	0.00544	0.00539	0.00522	0.00515	0.00526	0.00518	0.00521	0.00523	0.00525	0.00526	0.00521	0.00518	0.00509	0.00504	0.00494	0.00496	0.00496	0.00504	0.00501	0.00498	0.00493	0.0049	0.00481	0.00475
3554.14	0.00549	0.00546	0.00564	0.00556	0.00551	0.00544	0.0054	0.00523	0.00515	0.00527	0.00518	0.00522	0.00524	0.00525	0.00527	0.00521	0.00519	0.0051	0.00505	0.00495	0.00496	0.00497	0.00505	0.00502	0.00499	0.00493	0.00491	0.00482	0.00476
3556.07	0.00549	0.00546	0.00565	0.00557	0.00551	0.00545	0.00541	0.00523	0.00516	0.00527	0.00519	0.00522	0.00525	0.00526	0.00527	0.00522	0.00519	0.0051	0.00506	0.00496	0.00497	0.00498	0.00505	0.00502	0.005	0.00494	0.00491	0.00482	0.00476
3558	0.0055	0.00547	0.00565	0.00557	0.00552	0.00545	0.00541	0.00523	0.00516	0.00528	0.00519	0.00523	0.00525	0.00527	0.00528	0.00522	0.0052	0.0051	0.00506	0.00496	0.00497	0.00498	0.00506	0.00502	0.005	0.00494	0.00492	0.00483	0.00477
3559.92	0.0055	0.00547	0.00566	0.00558	0.00552	0.00545	0.00541	0.00523	0.00517	0.00528	0.0052	0.00523	0.00526	0.00527	0.00528	0.00523	0.0052	0.0051	0.00507	0.00496	0.00498	0.00498	0.00507	0.00503	0.005	0.00495	0.00492	0.00484	0.00477
3561.85	0.00551	0.00547	0.00566	0.00558	0.00552	0.00546	0.00541	0.00523	0.00517	0.00528	0.0052	0.00523	0.00526	0.00527	0.00528	0.00523	0.0052	0.0051	0.00507	0.00496	0.00498	0.00498	0.00507	0.00503	0.005	0.00495	0.00492	0.00484	0.00478
3563.78	0.0055	0.00547	0.00566	0.00558	0.00552	0.00546	0.00541	0.00523	0.00517	0.00528	0.00519	0.00523	0.00526	0.00527	0.00528	0.00523	0.0052	0.00511	0.00506	0.00497	0.00498	0.00498	0.00507	0.00503	0.005	0.00495	0.00493	0.00484	0.00478
3565.71	0.0055	0.00547	0.00566	0.00558	0.00552	0.00545	0.0054	0.00523	0.00516	0.00528	0.00519	0.00523	0.00526	0.00527	0.00527	0.00523	0.0052	0.00511	0.00506	0.00497	0.00498	0.00498	0.00507	0.00503	0.005	0.00495	0.00492	0.00484	0.00478
3567.64	0.0055	0.00547	0.00566	0.00558	0.00552	0.00545	0.0054	0.00523	0.00517	0.00528	0.00519	0.00523	0.00526	0.00526	0.00528	0.00522	0.0052	0.00511	0.00506	0.00497	0.00498	0.00498	0.00507	0.00503	0.005	0.00495	0.00492	0.00484	0.00478
3569.57	0.00551	0.00548	0.00566	0.00558	0.00552	0.00545	0.0054	0.00524	0.00517	0.00528	0.00519	0.00523	0.00525	0.00526	0.00528	0.00522	0.0052	0.00511	0.00507	0.00497	0.00498	0.00499	0.00507	0.00503	0.005	0.00496	0.00492	0.00484	0.00478
3571.5	0.00551	0.00548	0.00566	0.00558	0.00552	0.00546	0.0054	0.00524	0.00517	0.00528	0.0052	0.00523	0.00525	0.00527	0.00527	0.00522	0.0052	0.00511	0.00507	0.00497	0.00498	0.00499	0.00507	0.00504	0.005	0.00496	0.00493	0.00484	0.00479
3573.42	0.00551	0.00548	0.00566	0.00558	0.00552	0.00545	0.0054	0.00524	0.00516	0.00527	0.0052	0.00523	0.00525	0.00527	0.00527	0.00522	0.0052	0.00511	0.00507	0.00496	0.00498	0.00499	0.00507	0.00504	0.005	0.00496	0.00493	0.00485	0.00479
3575.35	0.0055	0.00548	0.00566	0.00558	0.00552	0.00545	0.0054	0.00523	0.00516	0.00527	0.00519	0.00523	0.00525	0.00526	0.00527	0.00522	0.0052	0.0051	0.00507	0.00496	0.00498	0.00498	0.00507	0.00504	0.00501	0.00496	0.00493	0.00485	0.00479
3577.28	0.0055	0.00547	0.00566	0.00557	0.00551	0.00544	0.0054	0.00523	0.00515	0.00527	0.00519	0.00522	0.00525	0.00526	0.00527	0.00522	0.0052	0.0051	0.00506	0.00496	0.00498	0.00498	0.00507	0.00503	0.005	0.00495	0.00493	0.00485	0.00479
3579.21	0.0055	0.00547	0.00565	0.00557	0.0055	0.00543	0.00539	0.00522	0.00515	0.00527	0.00519	0.00522	0.00524	0.00525	0.00527	0.00521	0.00519	0.0051	0.00506	0.00496	0.00498	0.00498	0.00507	0.00503	0.005	0.00495	0.00492	0.00484	0.00479
3581.14	0.00549	0.00546	0.00564	0.00556	0.0055	0.00543	0.00538	0.00521	0.00514	0.00526	0.00518	0.00521	0.00524	0.00525	0.00526	0.00521	0.00519	0.00509	0.00505	0.00495	0.00497	0.00498	0.00507	0.00502	0.005	0.00495	0.00492	0.00484	0.00479
3583.07	0.00548	0.00546	0.00564	0.00555	0.00549	0.00542	0.00538	0.0052	0.00513	0.00525	0.00517	0.0052	0.00523	0.00524	0.00525	0.0052	0.00518	0.00509	0.00505	0.00495	0.00497	0.00497	0.00506	0.00502	0.00499	0.00495	0.00492	0.00484	0.00478
3584.99	0.00547	0.00545	0.00563	0.00554	0.00548	0.00541	0.00537	0.00519	0.00512	0.00524	0.00516	0.00519	0.00523	0.00524	0.00524	0.0052	0.00517	0.00508	0.00504	0.00494	0.00496	0.00497	0.00505	0.00502	0.00499	0.00494	0.00491	0.00484	0.00478
3586.92	0.00546	0.00544	0.00562	0.00553	0.00547	0.0054	0.00536	0.00518	0.00511	0.00523	0.00515	0.00518	0.00521	0.00522	0.00523	0.00519	0.00517	0.00507	0.00503	0.00493	0.00495	0.00496	0.00504	0.00501	0.00498	0.00493	0.00491	0.00483	0.00478
3588.85	0.00545	0.00543	0.00561	0.00552	0.00546	0.00539	0.00535	0.00518	0.0051	0.00522	0.00514	0.00517	0.0052	0.00522	0.00523	0.00518	0.00516	0.00506	0.00502	0.00493	0.00494	0.00495	0.00503	0.005	0.00497	0.00493	0.00491	0.00483	0.00478
3590.78	0.00545	0.00542	0.00561	0.00551	0.00545	0.00538	0.00534	0.00517	0.00509	0.00521	0.00513	0.00516	0.00519	0.00521	0.00522	0.00517	0.00515	0.00505	0.00501	0.00492	0.00494	0.00495	0.00503	0.00499	0.00496	0.00492	0.0049	0.00483	0.00478
3592.71	0.00544	0.00542	0.0056	0.0055	0.00544	0.00537	0.00533	0.00516	0.00509	0.0052	0.00512	0.00515	0.00518	0.0052	0.0052	0.00516	0.00514	0.00504	0.005	0.00491	0.00493	0.00494	0.00502	0.00498	0.00495	0.00492	0.0049	0.00482	0.00478
3594.64	0.00543	0.00541	0.00559	0.00549	0.00542	0.00536	0.00532	0.00515	0.00508	0.00519	0.00511	0.00514	0.00517	0.00518	0.00519	0.00515	0.00513	0.00504	0.005	0.0049	0.00492	0.00494	0.00501	0.00498	0.00494	0.00491	0.00489	0.00482	0.00478
3596.57	0.00542	0.0054	0.00558	0.00548	0.00542	0.00535	0.0053	0.00514	0.00506	0.00518	0.0051	0.00513	0.00516	0.00517	0.00518	0.00513	0.00511	0.00503	0.00499	0.00489	0.00491	0.00492	0.005	0.00497	0.00494	0.0049	0.00488	0.00481	0.00477
3598.49	0.00541	0.00539	0.00557	0.00547	0.00541	0.00534	0.0053	0.00512	0.00505	0.00516	0.00509	0.00512	0.00515	0.00516	0.00517	0.00512	0.0051	0.00502	0.00498	0.00488	0.0049	0.00491	0.00499	0.00496	0.00493	0.00489	0.00487	0.0048	0.00476
3600.42	0.0054	0.00538	0.00556	0.00546	0.0054	0.00533	0.00529	0.00511	0.00504	0.00516	0.00508	0.00511	0.00513	0.00515	0.00516	0.00511	0.00509	0.005	0.00496	0.00488	0.00489	0.0049	0.00498	0.00495	0.00492	0.00488	0.00486	0.00479	0.00476
3602.35	0.0054	0.00538	0.00555	0.00545	0.00538	0.00532	0.00528	0.0051	0.00503	0.00515	0.00507	0.0051	0.00512	0.00514	0.00515	0.0051	0.00508	0.00499	0.00495	0.00487	0.00488	0.00489	0.00497	0.00494	0.00491	0.00487	0.00485	0.00479	0.00475
3604.28	0.00538	0.00537	0.00554	0.00544	0.00537	0.00531	0.00526	0.00509	0.00502	0.00514	0.00506	0.00509	0.00511	0.00513	0.00514	0.00509	0.00507	0.00498	0.00494	0.00486	0.00487	0.00488	0.00496	0.00493	0.0049	0.00486	0.00483	0.00478	0.00474
3606.21	0.00537	0.00535	0.00552	0.00543	0.00536	0.0053	0.00525	0.00508	0.00501	0.00513	0.00505	0.00508	0.00511	0.00512	0.00513	0.00508	0.00506	0.00497	0.00493	0.00484	0.00486	0.00487	0.00495	0.00492	0.00489	0.00485	0.00483	0.00477	0.00473
3608.14	0.00536	0.00534	0.00551	0.00542	0.00535	0.00529	0.00524	0.00508	0.00501	0.00512	0.00504	0.00507	0.0051	0.00512	0.00512	0.00508	0.00506	0.00497	0.00493	0.00484	0.00485	0.00486	0.00494	0.00491	0.00488	0.00484	0.00482	0.00476	0.00472
3610.06	0.00535	0.00533	0.0055	0.00541	0.00535	0.00528	0.00524	0.00507	0.005	0.00512	0.00504	0.00507	0.0051	0.00512	0.00512	0.00507	0.00506	0.00496	0.00493	0.00483	0.00485	0.00486	0.00494	0.00491	0.00488	0.00483	0.00481	0.00475	0.00472
3611.99	0.00534	0.00532	0.00549	0.0054	0.00534	0.00528	0.00524	0.00507	0.005	0.00511	0.00504	0.00507	0.0051	0.00511	0.00511	0.00507	0.00505	0.00496	0.00492	0.00483	0.00485	0.00486	0.00494	0.0049	0.00487	0.00483	0.00481	0.00475	0.00471
3613.92	0.00534	0.00531	0.00548	0.0054	0.00534	0.00527	0.00523	0.00506	0.00499	0.00511	0.00503	0.00507	0.00509	0.00511	0.00511	0.00507	0.00505	0.00496	0.00492	0.00483	0.00485	0.00485	0.00494	0.0049	0.00487	0.00483	0.00481	0.00474	0.00471
3615.85	0.00532	0.0053	0.00547	0.00539	0.00533	0.00527	0.00523	0.00506	0.00499	0.00511	0.00503	0.00506	0.00509	0.00511	0.00511	0.00507	0.00505	0.00496	0.00492	0.00483	0.00485	0.00485	0.00494	0.0049	0.00487	0.00483	0.00481	0.00474	0.0047
3617.78	0.00531	0.00529	0.00546	0.00538	0.00532	0.00526	0.00522	0.00506	0.00498	0.00511	0.00503	0.00506	0.00509	0.00511	0.00511	0.00507	0.00505	0.00496	0.00492	0.00483	0.00485	0.00485	0.00494	0.0049	0.00487	0.00483	0.00481	0.00473	0.0047
3619.71	0.00531	0.00528	0.00545	0.00537	0.00532	0.00526	0.00522	0.00505	0.00498	0.0051	0.00503	0.00506	0.00509	0.00511	0.00511	0.00507	0.00505	0.00496	0.00492	0.00483	0.00484	0.00485	0.00493	0.0049	0.00487	0.00483	0.00481	0.00473	0.0047
3621.64	0.0053	0.00527	0.00545	0.00537	0.00531	0.00526	0.00522	0.00505	0.00498	0.0051	0.00503	0.00506	0.00509	0.00511	0.00511	0.00507	0.00505	0.00496	0.00492	0.00483	0.00484	0.00486	0.00493	0.0049	0.00488	0.00483	0.00481	0.00474	0.0047
3623.56	0.0053	0.00527	0.00544	0.00536	0.00531	0.00525	0.00522	0.00505	0.00497	0.00509	0.00502	0.00505	0.00509	0.00511	0.00511	0.00507	0.00505	0.00495	0.00492	0.00483	0.00484	0.00486	0.00494	0.0049	0.00488	0.00483	0.00481	0.00474	0.0047
3625.49	0.00529	0.00525	0.00543	0.00535	0.0053	0.00525	0.00521	0.00504	0.00497	0.00509	0.00502	0.00505	0.00508	0.0051	0.00511	0.00507	0.00505	0.00495	0.00491	0.00483	0.00484	0.00486	0.00494	0.0049	0.00487	0.00483	0.00481	0.00473	0.0047
3627.42	0.00527	0.00524	0.00541	0.00533	0.00529	0.00523	0.0052	0.00503	0.00496	0.00508	0.005	0.00504	0.00507	0.00509	0.0051	0.00506	0.00504	0.00494	0.00491	0.00482	0.00484	0.00485	0.00493	0.0049	0.00487	0.00482	0.0048	0.00473	0.0047
3629.35	0.00525	0.00522	0.0054	0.00532	0.00528	0.00522	0.00519	0.00502	0.00495	0.00507	0.00499	0.00503	0.00506	0.00508	0.00509	0.00505	0.00503	0.00494	0.00491	0.00481	0.00483	0.00484	0.00493	0.00489	0.00486	0.00482	0.0048	0.00473	0.00469
3631.28	0.00524	0.00521	0.00539	0.00531	0.00526	0.00521	0.00517	0.00501	0.00495	0.00506	0.00499	0.00503	0.00505	0.00507	0.00508	0.00504	0.00502	0.00493	0.0049	0.0048	0.00482	0.00483	0.00492	0.00488	0.00485	0.00481	0.00479	0.00472	0.00468
3633.21	0.00523	0.00519	0.00537	0.00529	0.00525	0.0052	0.00516	0.00499	0.00494	0.00505	0.00498	0.00501	0.00504	0.00506	0.00507	0.00503	0.00501	0.00492	0.00489	0.00479	0.00481	0.00482	0.00491	0.00488	0.00484	0.00481	0.00478	0.00471	0.00468
3635.13	0.00521	0.00517	0.00535	0.00528	0.00523	0.00519	0.00514	0.00498	0.00492	0.00504	0.00496	0.005	0.00503	0.00504	0.00506	0.00502	0.005	0.00491	0.00488	0.00478	0.0048	0.00481	0.0049	0.00486	0.00483	0.00479	0.00477	0.0047	0.00467
3637.06	0.00518	0.00515	0.00533	0.00526	0.00521	0.00517	0.00512	0.00496	0.0049	0.00502	0.00494	0.00498	0.00501	0.00503	0.00504	0.005	0.00498	0.00489	0.00486	0.00477	0.00478	0.00479	0.00488	0.00485	0.00482	0.00478	0.00476	0.00469	0.00466
3638.99	0.00516	0.00513	0.0053	0.00523	0.00519	0.00514	0.0051	0.00493	0.00487	0.005	0.00492	0.00496	0.00498	0.00501	0.00502	0.00498	0.00496	0.00487	0.00484	0.00475	0.00476	0.00477	0.00486	0.00483	0.0048	0.00476	0.00474	0.00468	0.00465
3640.92	0.00513	0.0051	0.00527	0.0052	0.00516	0.00511	0.00507	0.00491	0.00484	0.00497	0.00489	0.00493	0.00496	0.00498	0.00499	0.00495	0.00493	0.00484	0.00481	0.00472	0.00474	0.00475	0.00483	0.0048	0.00477	0.00474	0.00472	0.00466	0.00464
3642.85	0.0051	0.00507	0.00524	0.00516	0.00512	0.00507	0.00503	0.00487	0.00481	0.00493	0.00485	0.0049	0.00492	0.00494	0.00495	0.00491	0.0049	0.00481	0.00478	0.00469	0.00471	0.00472	0.0048	0.00477	0.00474	0.00471	0.00469	0.00463	0.00462
3644.78	0.00506	0.00503	0.0052	0.00512	0.00508	0.00503	0.00499	0.00483	0.00477	0.00489	0.00482	0.00486	0.00488	0.0049	0.00491	0.00487	0.00486	0.00477	0.00474	0.00465	0.00467	0.00468	0.00476	0.00473	0.00471	0.00467	0.00466	0.0046	0.00459
3646.71	0.00502	0.00499	0.00516	0.00508	0.00504	0.00499	0.00495	0.00479	0.00473	0.00484	0.00478	0.00482	0.00484	0.00486	0.00487	0.00482	0.00482	0.00473	0.0047	0.00462	0.00463	0.00464	0.00472	0.0047	0.00467	0.00463	0.00462	0.00456	0.00457
3648.63	0.00499	0.00496	0.00512	0.00505	0.005	0.00495	0.00491	0.00476	0.0047	0.00481	0.00475	0.00478	0.0048	0.00483	0.00483	0.00479	0.00479	0.0047	0.00467	0.00458	0.0046	0.00461	0.00469	0.00467	0.00464	0.0046	0.00459	0.00453	0.00454
3650.56	0.00497	0.00494	0.0051	0.00503	0.00498	0.00493	0.0049	0.00474	0.00468	0.00479	0.00473	0.00477	0.00479	0.00481	0.00482	0.00478	0.00477	0.00468	0.00465	0.00456	0.00459	0.00459	0.00467	0.00465	0.00462	0.00458	0.00457	0.00451	0.00452
3652.49	0.00497	0.00493	0.00509	0.00502	0.00498	0.00493	0.00489	0.00474	0.00467	0.00479	0.00472	0.00476	0.00478	0.0048	0.00481	0.00477	0.00476	0.00467	0.00464	0.00456	0.00458	0.00459	0.00467	0.00464	0.00461	0.00457	0.00456	0.0045	0.0045
3654.42	0.00496	0.00492	0.00508	0.00502	0.00497	0.00492	0.00488	0.00473	0.00467	0.00478	0.00472	0.00475	0.00478	0.00479	0.00481	0.00477	0.00476	0.00467	0.00464	0.00455	0.00457	0.00458	0.00466	0.00463	0.00461	0.00457	0.00455	0.0045	0.00449
3656.35	0.00495	0.00492	0.00508	0.00501	0.00497	0.00492	0.00488	0.00473	0.00467	0.00478	0.00471	0.00475	0.00478	0.00479	0.00481	0.00477	0.00475	0.00467	0.00464	0.00455	0.00457	0.00458	0.00466	0.00463	0.0046	0.00457	0.00455	0.00449	0.00447
3658.28	0.00495	0.00491	0.00508	0.00501	0.00497	0.00492	0.00488	0.00473	0.00467	0.00478	0.00471	0.00475	0.00478	0.00479	0.0048	0.00477	0.00475	0.00466	0.00464	0.00454	0.00456	0.00457	0.00465	0.00463	0.0046	0.00456	0.00455	0.00449	0.00446
3660.2	0.00495	0.00491	0.00508	0.00501	0.00496	0.00492	0.00488	0.00474	0.00467	0.00478	0.00471	0.00475	0.00478	0.00479	0.0048	0.00476	0.00475	0.00466	0.00463	0.00454	0.00456	0.00457	0.00465	0.00462	0.00459	0.00456	0.00454	0.00448	0.00445
3662.13	0.00496	0.00492	0.00508	0.00501	0.00497	0.00493	0.00489	0.00474	0.00467	0.00479	0.00471	0.00475	0.00478	0.0048	0.0048	0.00476	0.00475	0.00466	0.00464	0.00454	0.00456	0.00457	0.00465	0.00462	0.00459	0.00456	0.00454	0.00448	0.00445
3664.06	0.00497	0.00494	0.0051	0.00503	0.00499	0.00494	0.00491	0.00475	0.00468	0.0048	0.00472	0.00476	0.00479	0.00481	0.00481	0.00478	0.00476	0.00467	0.00465	0.00455	0.00457	0.00458	0.00466	0.00463	0.0046	0.00456	0.00455	0.00449	0.00446
3665.99	0.005	0.00496	0.00513	0.00505	0.00502	0.00497	0.00494	0.00478	0.00471	0.00483	0.00475	0.00479	0.00482	0.00483	0.00484	0.0048	0.00479	0.0047	0.00467	0.00458	0.0046	0.0046	0.00469	0.00466	0.00463	0.00459	0.00457	0.00451	0.00447
3667.92	0.00504	0.005	0.00518	0.0051	0.00506	0.00501	0.00497	0.00481	0.00475	0.00487	0.00479	0.00483	0.00486	0.00487	0.00488	0.00484	0.00482	0.00473	0.0047	0.00461	0.00463	0.00464	0.00472	0.00469	0.00466	0.00462	0.0046	0.00454	0.0045
3669.85	0.00509	0.00505	0.00522	0.00515	0.0051	0.00505	0.00502	0.00486	0.00479	0.00491	0.00483	0.00487	0.0049	0.00491	0.00492	0.00488	0.00487	0.00478	0.00475	0.00466	0.00468	0.00468	0.00477	0.00474	0.00471	0.00467	0.00464	0.00458	0.00454
3671.78	0.00514	0.0051	0.00527	0.0052	0.00515	0.0051	0.00506	0.0049	0.00484	0.00496	0.00488	0.00492	0.00494	0.00496	0.00497	0.00493	0.00492	0.00482	0.00479	0.0047	0.00472	0.00473	0.00481	0.00478	0.00475	0.00471	0.00469	0.00462	0.00458
3673.7	0.00518	0.00514	0.00531	0.00524	0.00519	0.00514	0.0051	0.00494	0.00488	0.00499	0.00492	0.00496	0.00498	0.005	0.00501	0.00497	0.00496	0.00486	0.00483	0.00474	0.00476	0.00477	0.00485	0.00482	0.00479	0.00475	0.00473	0.00466	0.00462
3675.63	0.00522	0.00517	0.00535	0.00527	0.00522	0.00517	0.00514	0.00497	0.00491	0.00502	0.00495	0.00499	0.00501	0.00503	0.00504	0.005	0.00499	0.00489	0.00486	0.00477	0.00479	0.0048	0.00488	0.00485	0.00482	0.00478	0.00476	0.00469	0.00466
3677.56	0.00525	0.0052	0.00539	0.0053	0.00525	0.00519	0.00516	0.00499	0.00493	0.00505	0.00497	0.00501	0.00504	0.00505	0.00506	0.00502	0.00501	0.00491	0.00489	0.00479	0.00481	0.00482	0.00491	0.00488	0.00485	0.00481	0.00479	0.00473	0.00469
3679.49	0.00527	0.00522	0.00541	0.00532	0.00527	0.00521	0.00517	0.005	0.00494	0.00506	0.00498	0.00502	0.00505	0.00507	0.00508	0.00503	0.00502	0.00493	0.0049	0.00481	0.00483	0.00484	0.00493	0.0049	0.00487	0.00483	0.00481	0.00475	0.00471
3681.42	0.00528	0.00524	0.00542	0.00533	0.00528	0.00522	0.00518	0.00502	0.00495	0.00507	0.00499	0.00503	0.00506	0.00508	0.00509	0.00504	0.00503	0.00494	0.00491	0.00482	0.00485	0.00485	0.00494	0.00491	0.00488	0.00484	0.00483	0.00477	0.00474
3683.35	0.0053	0.00526	0.00544	0.00535	0.0053	0.00524	0.00519	0.00503	0.00496	0.00508	0.005	0.00505	0.00507	0.00509	0.0051	0.00506	0.00505	0.00495	0.00493	0.00483	0.00486	0.00487	0.00496	0.00493	0.0049	0.00486	0.00485	0.00479	0.00476
3685.27	0.00534	0.00529	0.00547	0.00538	0.00533	0.00527	0.00522	0.00506	0.00499	0.00511	0.00503	0.00507	0.0051	0.00511	0.00512	0.00509	0.00507	0.00498	0.00496	0.00486	0.00488	0.0049	0.00498	0.00495	0.00492	0.00489	0.00488	0.00482	0.00479
3687.2	0.00538	0.00534	0.00551	0.00543	0.00537	0.00531	0.00527	0.0051	0.00503	0.00515	0.00507	0.00511	0.00514	0.00516	0.00517	0.00513	0.00511	0.00502	0.00499	0.0049	0.00492	0.00493	0.00502	0.00499	0.00496	0.00493	0.00491	0.00485	0.00481
3689.13	0.00544	0.0054	0.00558	0.00549	0.00544	0.00538	0.00534	0.00516	0.00509	0.00522	0.00513	0.00517	0.0052	0.00522	0.00523	0.00519	0.00517	0.00508	0.00504	0.00495	0.00497	0.00498	0.00507	0.00503	0.00501	0.00497	0.00495	0.00488	0.00484
3691.06	0.0055	0.00546	0.00565	0.00556	0.00551	0.00545	0.00541	0.00523	0.00516	0.00529	0.0052	0.00524	0.00527	0.00528	0.0053	0.00525	0.00523	0.00514	0.0051	0.005	0.00502	0.00503	0.00512	0.00509	0.00506	0.00501	0.00499	0.00492	0.00487
3692.99	0.00555	0.00551	0.0057	0.00562	0.00557	0.00551	0.00547	0.00529	0.00522	0.00534	0.00526	0.0053	0.00533	0.00534	0.00535	0.00531	0.00529	0.00519	0.00515	0.00505	0.00507	0.00508	0.00516	0.00514	0.0051	0.00505	0.00503	0.00495	0.0049
3694.92	0.0056	0.00555	0.00575	0.00567	0.00562	0.00556	0.00552	0.00534	0.00527	0.00538	0.0053	0.00535	0.00537	0.00539	0.0054	0.00535	0.00533	0.00523	0.00519	0.00509	0.00511	0.00511	0.0052	0.00517	0.00513	0.00508	0.00506	0.00498	0.00492
3696.85	0.00563	0.00558	0.00578	0.0057	0.00566	0.0056	0.00555	0.00538	0.0053	0.00542	0.00534	0.00538	0.00541	0.00542	0.00543	0.00538	0.00536	0.00526	0.00522	0.00512	0.00513	0.00514	0.00523	0.00519	0.00516	0.00511	0.00508	0.005	0.00493
3698.77	0.00565	0.0056	0.00581	0.00573	0.00569	0.00562	0.00558	0.0054	0.00533	0.00545	0.00537	0.0054	0.00543	0.00545	0.00546	0.00541	0.00538	0.00528	0.00524	0.00514	0.00515	0.00516	0.00525	0.00521	0.00518	0.00513	0.00509	0.00501	0.00494
3700.7	0.00567	0.00562	0.00582	0.00575	0.00571	0.00564	0.00559	0.00542	0.00534	0.00547	0.00539	0.00542	0.00545	0.00546	0.00547	0.00542	0.0054	0.00529	0.00525	0.00515	0.00517	0.00517	0.00526	0.00522	0.00519	0.00514	0.0051	0.00502	0.00494
3702.63	0.00568	0.00563	0.00583	0.00576	0.00572	0.00566	0.00561	0.00543	0.00535	0.00548	0.0054	0.00543	0.00546	0.00547	0.00548	0.00543	0.00541	0.0053	0.00526	0.00516	0.00518	0.00518	0.00527	0.00523	0.0052	0.00515	0.00511	0.00502	0.00495
3704.56	0.00568	0.00563	0.00584	0.00577	0.00573	0.00566	0.00562	0.00543	0.00536	0.00549	0.0054	0.00544	0.00547	0.00548	0.00549	0.00544	0.00541	0.00531	0.00527	0.00516	0.00518	0.00518	0.00528	0.00524	0.0052	0.00515	0.00512	0.00503	0.00496
3706.49	0.00568	0.00563	0.00584	0.00577	0.00572	0.00566	0.00562	0.00543	0.00536	0.00549	0.0054	0.00544	0.00547	0.00548	0.00549	0.00544	0.00541	0.00531	0.00527	0.00517	0.00518	0.00518	0.00528	0.00524	0.0052	0.00515	0.00512	0.00502	0.00496
3708.42	0.00567	0.00562	0.00583	0.00576	0.00572	0.00565	0.00561	0.00542	0.00535	0.00548	0.00539	0.00543	0.00546	0.00547	0.00549	0.00543	0.00541	0.0053	0.00527	0.00516	0.00518	0.00518	0.00527	0.00523	0.0052	0.00514	0.00511	0.00502	0.00495
3710.34	0.00566	0.00561	0.00582	0.00575	0.00571	0.00564	0.0056	0.00541	0.00535	0.00547	0.00538	0.00542	0.00545	0.00547	0.00548	0.00543	0.0054	0.00529	0.00526	0.00516	0.00517	0.00517	0.00526	0.00523	0.00519	0.00514	0.0051	0.00501	0.00494
3712.27	0.00565	0.0056	0.00581	0.00574	0.0057	0.00563	0.00559	0.0054	0.00534	0.00546	0.00538	0.00542	0.00545	0.00546	0.00547	0.00542	0.00539	0.00529	0.00525	0.00515	0.00516	0.00517	0.00526	0.00522	0.00518	0.00514	0.0051	0.00501	0.00493
3714.2	0.00564	0.00559	0.0058	0.00573	0.00569	0.00563	0.00559	0.0054	0.00533	0.00546	0.00537	0.00541	0.00544	0.00545	0.00547	0.00542	0.00539	0.00528	0.00524	0.00514	0.00516	0.00517	0.00525	0.00522	0.00518	0.00513	0.0051	0.005	0.00494
3716.13	0.00564	0.00559	0.0058	0.00573	0.00569	0.00563	0.00559	0.0054	0.00533	0.00546	0.00537	0.00541	0.00544	0.00545	0.00546	0.00542	0.00539	0.00528	0.00524	0.00514	0.00516	0.00517	0.00526	0.00522	0.00518	0.00513	0.0051	0.00501	0.00494
3718.06	0.00564	0.0056	0.0058	0.00574	0.0057	0.00564	0.00559	0.00541	0.00534	0.00546	0.00538	0.00542	0.00544	0.00546	0.00547	0.00542	0.0054	0.00528	0.00525	0.00515	0.00516	0.00517	0.00526	0.00522	0.00518	0.00514	0.00511	0.00501	0.00495
[truncated: 145 more rows]

## Sheet: SingleChannel_475C
Wavenumber	Nitrogen	25H2	50H2	75H2	100H2	125H2	150H2	175H2	200H2	250H2	300H2	350H2	400H2	450H2	500H2	750H2	1000H2	1250H2	1500H2	1750H2	2000H2	2250H2	2500H2	2750H2	3000H2	4000H2	5000H2	7500H2	10000H2
[truncated: 1,867 more rows]

[truncated: 1 more sheets: SingleChannel_450C]
